# Supplementary material for: Secondary-sphere modification in proline catalysis: old friend, new connection
Source: Royal Society of Chemistry journal article supplement (doi:10.1039/d1cc05589e), 2021-12-23
Supplement: d1cc05589e1.pdf [file d1cc05589e1.pdf]

## Secondary-sphere modification in proline catalysis: Old friend, new connection

Ido Domb, Danilo M. Lustosa and Anat Milo\*

Department of Chemistry, Ben-Gurion University of the Negev, Beer-Sheva 84105, Israel

\*correspondence may be addressed to anatmilo@bgu.ac.il

### Supporting Information

#### Table of Contents

|     |                                                                              |     |
|-----|------------------------------------------------------------------------------|-----|
| 1.  | General Information -----                                                    | 2   |
| 2.  | Synthesis of Aryl boroxine -----                                             | 3   |
| 4.  | Control experiments -----                                                    | 5   |
| 5.  | Solvent screening -----                                                      | 7   |
| 6.  | Time optimization -----                                                      | 8   |
| 7.  | Water optimization -----                                                     | 9   |
| 8.  | Boronic acid screening -----                                                 | 10  |
| 9.  | Aldehyde scope -----                                                         | 13  |
| 10. | Additional ketones as donors -----                                           | 14  |
| 11. | Boronic acid screening for acetone as aldol donor -----                      | 15  |
| 12. | Screening of boronic acid / proline ratio using acetone as a substrate ----- | 16  |
| 13. | Mechanistic investigation -----                                              | 17  |
| 14. | Characterization -----                                                       | 30  |
| 15. | Chiral HPLC of the scope -----                                               | 37  |
| 16. | Chiral HPLC of optimization and control experiments -----                    | 58  |
| 17. | NMR spectra of aldol adducts after purification -----                        | 88  |
| 18. | Crude NMR spectra -----                                                      | 118 |
| 19. | References -----                                                             | 196 |

## 1. General Information

Reagents were purchased from commercial suppliers and used without further purification, unless otherwise stated. All the aldehydes were distilled before use. Anhydrous solvents were prepared from commercial grade (AR), added to molecular sieves (3Å) that were activated by microwave (20% m/v) for 6-7 minutes and then under vacuum with flame. The solvent with molecular sieves was kept under argon for at least 48h before use. For catalytic reactions, the molecular sieves (3, 4 and 5Å) were crushed to powder, weighed and kept in the oven in the reaction vial overnight at 200 °C, they were then activated by heat gun and cooled to room temperature under argon before use. Thin-layer chromatography (TLC) analysis of reaction mixtures was performed using Merck silica gel 60 F254 TLC plates and visualized under UV or by staining with anisaldehyde stain. Column chromatography was performed on Merck Silica Gel 60 Å, 230 X 400 mesh. Nuclear magnetic resonance (NMR) spectra were recorded using a Bruker DPX400 instrument. <sup>1</sup>H and <sup>13</sup>C chemical shifts are reported in ppm downfield of tetramethylsilane and referenced to residual solvent peak (CHCl<sub>3</sub>; δH = 7.26 ppm and δC = 77.0 ppm, DMSO; δH = 2.50 ppm and δC = 39.5 ppm, ACN; δH = 1.96 ppm). Multiplicities are reported using the following abbreviations: s = singlet, d = doublet, t = triplet, q = quartet, m = multiplet. Solvent abbreviations are reported as follows: EtOAc = ethyl acetate, Hex = hexanes, DCM = dichloromethane, Et<sub>2</sub>O = diethyl ether, MeOH = methanol, THF = tetrahydrofuran. Enantiomeric excess was measured on a Shimadzu high performance liquid chromatography, LC-20A series chiral HPLC using Chiralpak IB, IA, IC, AD-H, and AS-H columns.

All raw files for HPLC, Mass spectrometry and NMR analyses presented in this work are provided online:

<https://github.com/Milo-group/ChemComm2021>

## 2. Synthesis of Aryl boroxine

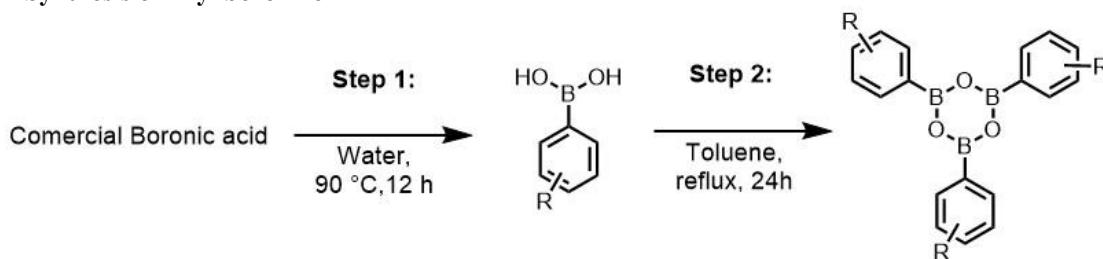

### Step 1: Synthesis of boronic acid

Commercial aryl boroxines are available as a mixture of boronic acid, its dimer and boroxine. To better control the addition of boronic acid to our reaction, we converted the purchased mixture completely to the respective boroxine. This was accomplished by first heating the mixture in water (distilled) for 12 h, at 90 °C. This yielded the boronic acid as a solid, after filtration. The solid was then brought into a sealed box (or a desiccator) containing Drierite and left to dry for 12 h. Next, the boronic acid was converted to boroxine, following the procedure presented in step 2

### Step 2: Boroxine synthesis

In a dry Dean-Stark apparatus equipped with a magnetic stir bar and under argon, the aryl boronic acid prepared in step 1 (16.4 mmol) and anhydrous toluene (70 mL) were added. The mixture was refluxed for 24 h and was allowed to cool to room temperature, followed by evaporation under reduced pressure to furnish boroxine.<sup>1</sup>

## 3. General Procedure for the Enantioselective Direct Aldol Reaction

Proline (0.05 mmol, 5.8 mg), 2-F-phenyl boroxine (0.0333 mmol, 12.1 mg), 1,3,5-trimethoxybenzene (20 mg, 0.119 mmol), 25 mg of molecular sieves 3 Å, 0.8 mL cyclopentanone and 9  $\mu\text{L}$   $\text{H}_2\text{O}$  were placed in a screw capped vial under argon. The mixture was stirred for 15 min at ambient temperature followed by addition of aldehyde (0.5 mmol). After completion of the reaction, the reaction mixture was treated with saturated aqueous ammonium chloride solution and the whole mixture was extracted 3 times with  $\text{CHCl}_3$ . The organic layer was dried over sodium-sulfate and concentrated to give a crude residue which was then purified via column chromatography over silica gel using hexane-ethyl acetate or hexane-DCM as an eluent to afford pure product. Diastereoselectivity and yield were determined by  $^1\text{H}$  NMR analysis of the crude aldol product. The enantiomeric excess (ee) of the aldol product was determined by chiral-phase HPLC analysis. The absolute configuration of aldol products was determined by comparing the values with those previously reported in the literature.<sup>6-9</sup>

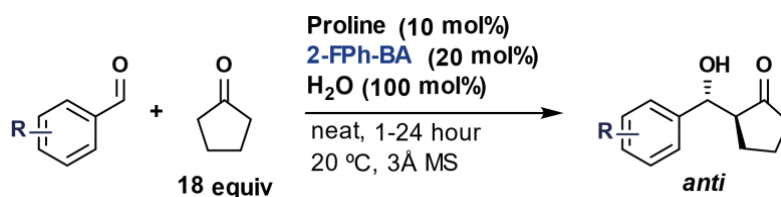

**Scheme S1.** General aldol Reaction scheme

Lastly, solvent was removed under reduced pressure and the reaction crude was then dissolved in CDCl<sub>3</sub> and directly analyzed via <sup>1</sup>H NMR for yield and diastereoselectivity determination. From this solution, 0.05 mL was sampled into HPLC vials. The solvent was again removed under high vacuum and the remaining crude was diluted with 1 mL of isopropanol and analyzed via chiral-HPLC for determination of enantioselectivity.



#### 4. Control experiments

These reactions were performed according to the general procedure above, all NMR spectra and HPLC traces are presented below.

**Table S1.** Control experiments

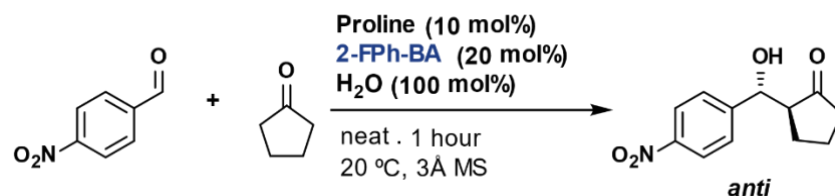

| Deviation from conditions                                         | Yield <sup>[a]</sup> % |    | d.r. <sup>[a]</sup> |        | ee <sup>[b]</sup> % |     |
|-------------------------------------------------------------------|------------------------|----|---------------------|--------|---------------------|-----|
| No boronic acid, no H <sub>2</sub> O <sup>[c]</sup>               | 10                     | 14 | 0.4:1               | 0.3:1  | n.d                 | n.d |
| No boronic acid <sup>[d]</sup>                                    | 36                     | 39 | 0.6:1               | 0.7:1  | 35                  | 37  |
| No proline <sup>[f]</sup>                                         | 0                      | 0  | --                  | --     | --                  | --  |
| No molecular sieves <sup>[e]</sup>                                | 75                     | 75 | 11.1:1              | 11.5:1 | 97                  | 96  |
| No molecular sieves <sup>[e]</sup> , 77 mol% H <sub>2</sub> O     | 57                     | 57 | 7.5:1               | 8.2:1  | 98                  | 98  |
| No molecular sieves <sup>[e]</sup> , 55 mol% H <sub>2</sub> O     | 40                     | 48 | 6.2:1               | 7.2:1  | 97                  | 97  |
| No molecular sieves <sup>[e]</sup> , 22 mol% H <sub>2</sub> O     | 25                     | 29 | 4.8:1               | 6.5:1  | 96                  | 96  |
| 4 Å molecular sieves                                              | 86                     | 86 | 10.1:1              | 11.0:1 | 97                  | 96  |
| 5 Å molecular sieves                                              | 56                     | 59 | 8.6:1               | 6.4:1  | 96                  | 97  |
| No molecular sieves <sup>[e]</sup> , 100 mol% KCl <sub>(s)</sub>  | 76                     | 79 | 11.1:1              | 11.9:1 | 98                  | 98  |
| No molecular sieves <sup>[e]</sup> , 10 mol% 2,6-lutidine         | 78                     | 80 | 9.1:1               | 9.9:1  | 98                  | 98  |
| No molecular sieves <sup>[e]</sup> , 10 mol% KHCO <sub>3(s)</sub> | 69                     | 67 | 1.3:1               | 1.2:1  | 30                  | 37  |

Reaction conditions: Proline (0.05 mmol, 5.8 mg), 2-F-phenyl boroxine (0.0333 mmol, 12.1 mg), 1,3,5-trimethoxybenzene (20 mg, 0.119 mmol), 25 mg of molecular sieves 3 Å, 0.8 mL cyclopentanone, 9 µL H<sub>2</sub>O were first mixed together and stirred for 15 min, followed by addition of 0.5 mmol of *p*-nitro benzaldehyde; <sup>a</sup>determined by the crude H<sup>1</sup> NMR; <sup>b</sup>determined by chiral HPLC; <sup>c</sup>Neither water nor boronic acid were added; <sup>d</sup>no boronic acid was added; <sup>e</sup>no molecular sieves were added; <sup>f</sup>no proline

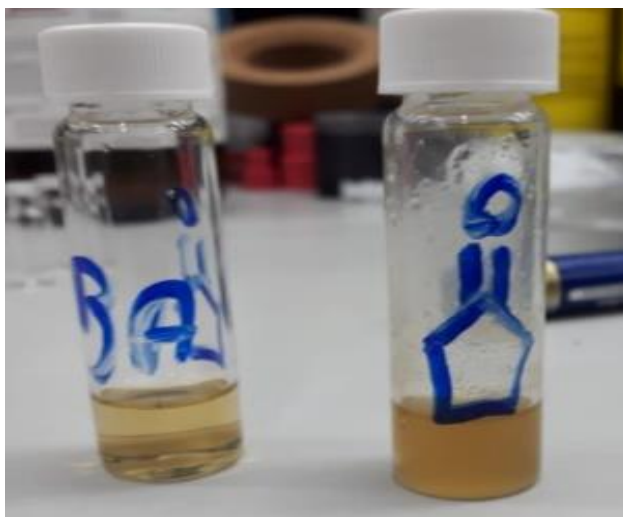

**Figure S1.** Reaction with addition of boronic acid (left) vs. reaction without boronic acid

## 5. Solvent screening

A set of 4 different solvent have been tested as a part of the optimization. Results shown below (all NMR spectra and HPLC traces are presented bellow).

**Table S2.** Reaction Optimization: Solvent screening

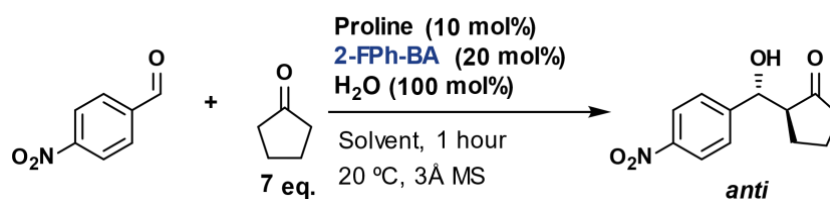

| Solvent            | Yield <sup>[a]</sup> % |    | d.r. <sup>[a]</sup> |        | ee <sup>[b]</sup> % |     |
|--------------------|------------------------|----|---------------------|--------|---------------------|-----|
| CH <sub>3</sub> CN | 17                     | 19 | n.d. <sup>[c]</sup> | 19.3:1 | n.d                 | n.d |
| CHCl <sub>3</sub>  | 25                     | 32 | 6.9:1               | 7.1:1  | 89                  | 90  |
| MeOH               | 57                     | 70 | 5.5                 | 4.0    | 20                  | 20  |
| Hexane             | 67                     | 78 | 3.7                 | 3.9    | 65                  | 67  |

Reaction conditions: Proline (0.05 mmol, 5.8 mg), 2-F-phenyl boroxine (0.0333 mmol, 12.1 mg), 1,3,5-trimethoxybenzene (20 mg, 0.119 mmol), 25 mg of molecular sieves 3 Å, 0.2 mL cyclopentanone, 0.6 mL solvent, 9 µL H<sub>2</sub>O and 0.5 mmol of *p*-nitro benzaldehyde.; <sup>a</sup>determined by the crude H<sup>1</sup> NMR.; <sup>b</sup>determined by chiral HPLC.; <sup>c</sup> d.r couldn't be determined accurately in the crude mixture.

## 6. Time optimization

**Table S3.** Reaction optimization: Time screening

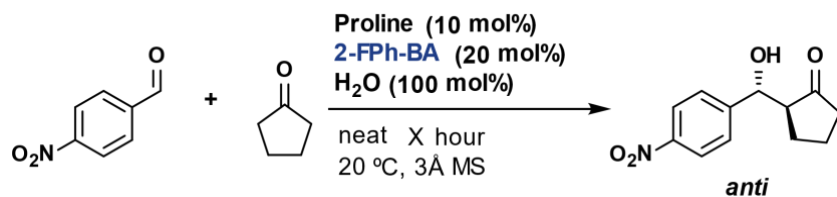

| Time (hours) | Yield <sup>[a]</sup> % |    | d.r. <sup>[a]</sup> |        | ee <sup>[b]</sup> % |    |
|--------------|------------------------|----|---------------------|--------|---------------------|----|
| <b>0.5</b>   | 81                     | 86 | 9.4:1               | 9.7:1  | 96                  | 96 |
| <b>1</b>     | 98                     | 99 | 10.6:1              | 12.8:1 | 96                  | 96 |
| <b>2</b>     | 88                     | 93 | 11.9:1              | 11.8:1 | 96                  | 96 |
| <b>4</b>     | 86                     | 87 | 8.7:1               | 8.1:1  | 96                  | 96 |
| <b>20</b>    | 87                     | 92 | 5.9:1               | 6.3:1  | 96                  | 96 |

Reaction conditions: Proline (0.05 mmol, 5.8 mg), 2-F-phenyl boroxine (0.0333 mmol, 12.1 mg), 1,3,5-trimethoxybenzene (20 mg, 0.119 mmol), 25 mg of molecular sieves 3 Å, 0.8 mL cyclopentanone, 9 µL H<sub>2</sub>O and 0.5 mmol of *p*-nitro benzaldehyde.; <sup>b</sup> determined by the crude H<sup>1</sup> NMR.; <sup>c</sup> determined by chiral HPLC.

## 7. Water optimization

**Table S4.** Reaction optimization: Screening of amount of water (0-200 mol%)

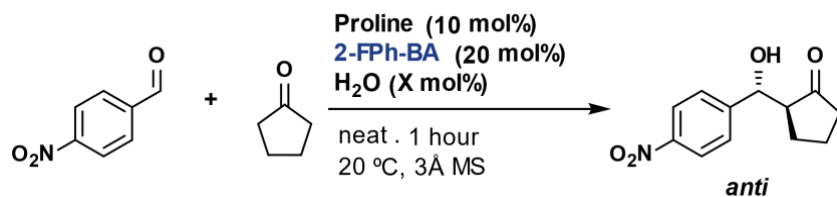

| H <sub>2</sub> O (mol%) | Yield <sup>[a]</sup> % |    | d.r. <sup>[b]</sup> |        | ee <sup>[c]</sup> % |    |
|-------------------------|------------------------|----|---------------------|--------|---------------------|----|
| <b>0</b>                | 31                     | 26 | 5.1:1               | 5.2:1  | 89                  | 90 |
| <b>50</b>               | 46                     | 47 | 6.8:1               | 8.2:1  | 96                  | 96 |
| <b>100</b>              | 98                     | 99 | 10.6:1              | 12.8:1 | 96                  | 96 |
| <b>200</b>              | 98                     | 99 | 10.0:1              | 11.2:1 | 88                  | 90 |

Reaction conditions: Proline (0.05 mmol, 5.8 mg), 2-F-phenyl boroxine (0.0333 mmol, 12.1 mg), 1,3,5-trimethoxybenzene (20 mg, 0.119 mmol), 25 mg of molecular sieves 3 Å, 0.8 mL cyclopentanone, 9 µL H<sub>2</sub>O and 0.5 mmol of *p*-nitro benzaldehyde.; <sup>a</sup>determined by the crude H<sup>1</sup> NMR; <sup>c</sup>determined by chiral HPLC.

## 8. Boronic acid screening

**Table S5.** Reaction optimization: Boronic acid screening

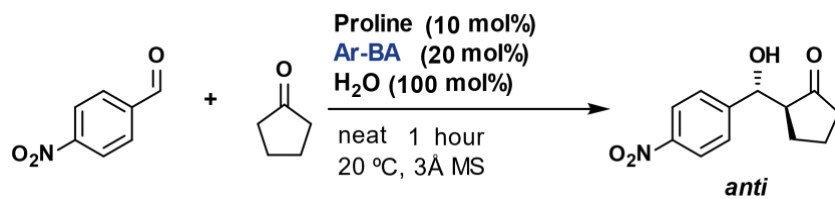

| Boronic acid | Yield <sup>[a]</sup> % |    | d.r. <sup>[a]</sup> |        | ee <sup>[b]</sup> % |    |
|--------------|------------------------|----|---------------------|--------|---------------------|----|
|              | 78                     | 81 | 10.1:1              | 10.8:1 | 96                  | 96 |
|              | 89                     | 88 | 11.3:1              | 9.9:1  | 98                  | 97 |
|              | 93                     | 89 | 3.6:1               | 3.4:1  | 90                  | 90 |
|              | 90                     | 91 | 3.3:1               | 3.4:1  | 92                  | 90 |
|              | 90                     | 95 | 6.4:1               | 6.3:1  | 92                  | 92 |
|              | 76                     | 76 | 3.6:1               | 3.9:1  | 90                  | 90 |

|                                                                                     |    |    |        |        |    |    |
|-------------------------------------------------------------------------------------|----|----|--------|--------|----|----|
| 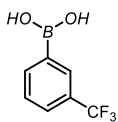   | 73 | 78 | 9.9:1  | 10.4:1 | 96 | 96 |
|    | 94 | 98 | 6.1:1  | 6.2:1  | 92 | 92 |
|    | 70 | 76 | 3.3:1  | 3.8:1  | 92 | 92 |
|   | 76 | 78 | 6.6:1  | 6.9:1  | 94 | 94 |
|  | 71 | 72 | 3.2:1  | 3.3:1  | 90 | 90 |
|  | 88 | 87 | 4.7:1  | 5.6:1  | 90 | 90 |
|  | 89 | 90 | 4.4:1  | 4.6:1  | 98 | 98 |
|  | 73 | 73 | 5.5:1  | 5.7:1  | 92 |    |
|  | 98 | 99 | 10.6:1 | 12.8:1 | 96 | 96 |

Reaction conditions: Proline (0.05 mmol, 5.8 mg), aryl boroxine (0.0333 mmol), 1,3,5-trimethoxybenzene (20 mg, 0.119 mmol), 25 mg of molecular sieves 3 Å, 0.8 mL cyclopentanone, 9 µL H<sub>2</sub>O and 0.5 mmol of *p*-nitro benzaldehyde. <sup>a</sup>determined by the crude H<sup>1</sup> NMR; <sup>b</sup>determined by chiral HPLC.



## 9. Aldehyde scope

**Table S6.** Reaction scope

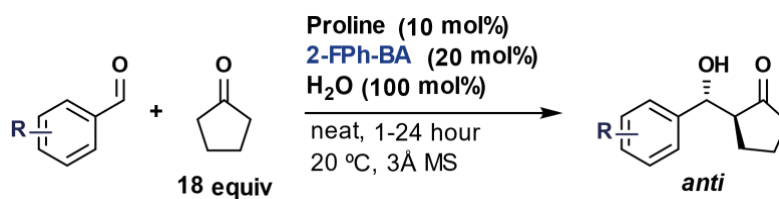

| Benzaldehyde      | Reaction Time (hours) | Yield <sup>[a]</sup> % |    | ee <sup>[c]</sup> % |    | d.r <sup>[b]</sup> |        |
|-------------------|-----------------------|------------------------|----|---------------------|----|--------------------|--------|
| 4-NO <sub>2</sub> | 1                     | 99                     | 98 | 96                  | 96 | 12.7:1             | 11.7:1 |
| 4-I               | 1                     | 92                     | 89 | 94                  | 94 | 10.1:1             | 9.7:1  |
| 4-Cl              | 24                    | 78                     | 78 | 93                  | 94 | 6.34:1             | 6.14:1 |
| 2-F               | 1                     | 85                     | 83 | 97                  | 98 | 17.2:1             | 17.9:1 |
| 2-Cl              | 1                     | 91                     | 93 | 96                  | 96 | 9.7:1              | 9.2:1  |
| 2-Br              | 1                     | 78                     | 75 | 92                  | 94 | 10.1:1             | 9.0:1  |
| 4-CF <sub>3</sub> | 1                     | 86                     | 88 | 95                  | 94 | 9.5:1              | 8.5:1  |
| -H                | 24                    | 90                     | 89 | 89                  | 90 | 5.5:1              | 5.3:1  |
| 3-Ome             | 24                    | 81                     | 82 | 92                  | 92 | 6:1                | 6.4:1  |
| 4-Me              | 24                    | 83                     | 81 | 88                  | 90 | 6.4:1              | 5.4:1  |
| 2-Ome             | 24                    | 87                     | 88 | 89                  | 89 | 4.8:1              | 4.8:1  |
| 3-Cl              | 1                     | 89                     | 88 | 94                  | 95 | 7.5:1              | 6.2:1  |
| Thiophene         | 24                    | 81                     | 83 | 92                  | 92 | 6.5:1              | 6.3:1  |
| Furfural          | 24                    | 88                     | 88 | 88                  | 86 | 4.6:1              | 4.5:1  |

Reaction conditions: Proline (0.05 mmol, 5.8 mg), 2-F-phenyl boroxine (0.0333 mmol, 12.1 mg), 1,3,5-trimethoxybenzene (20 mg, 0.119 mmol), 25 mg of molecular sieves 3 Å, 0.8 mL cyclopentanone, 9 µL H<sub>2</sub>O and 0.5 mmol of aryl aldehyde; <sup>a</sup>isolated yield; <sup>b</sup>determined by the crude H<sup>1</sup> NMR; <sup>c</sup>determined by chiral HPLC.

## 10. Additional ketones as donors

Table S7. Ketone scope

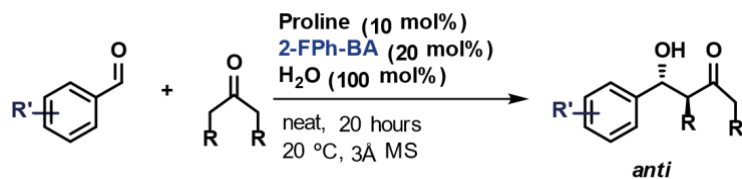

| Ketone donor    | Benzaldehyde      | Yield <sup>[a]</sup> % |     | ee <sup>[c]</sup> % |    | d.r <sup>[b]</sup> |        |
|-----------------|-------------------|------------------------|-----|---------------------|----|--------------------|--------|
| Cyclo-hexanone  | 4-NO <sub>2</sub> | 90                     | 88  | 98                  | 98 | 12.3:1             | 14.3:1 |
|                 | 4-CF <sub>3</sub> | >99                    | >99 | 98                  | 98 | 15.1:1             | 18.5:1 |
|                 | 4-CN              | 90                     | 97  | 98                  | 98 | 18.5:1             | 20.0:1 |
|                 | 2-OMe             | 71                     | 71  | 98                  | 98 | 3.3:1              | 4.6:1  |
|                 | 4-Cl              | 81                     | 84  | 93                  | 93 | 11.8:1             | 13.4:1 |
| Acetone         | 4-NO <sub>2</sub> | 63                     | 64  | 68                  | 66 | --                 | --     |
|                 | 4-CN              | 60                     | 59  | 67                  | 68 | --                 | --     |
|                 | 2-OMe             | 24                     | 21  | 68                  | 67 | --                 | --     |
| Cyclo-heptanone | 4-NO <sub>2</sub> | n.d                    | n.d | --                  | -- | --                 | --     |

Reaction conditions: Proline (0.05 mmol, 5.8 mg), 2-F-phenyl boroxine (0.0333 mmol, 12.1 mg), 1,3,5-trimethoxybenzene (20 mg, 0.119 mmol), 25 mg of molecular sieves 3 Å, 0.8 mL ketone, 9 µL H<sub>2</sub>O and 0.5 mmol of aryl aldehyde; <sup>a</sup>isolated yield; <sup>b</sup>determined by the crude <sup>1</sup>H NMR; <sup>c</sup>determined by chiral HPLC. n.d = no product detected.

## 11. Boronic acid screening for acetone as aldol donor

The selection of 2-fluoroboronic acid as secondary sphere modifier was made on the basis of the optimization presented below. In this optimization, acetone was used as aldol donor and it was part of our preliminary investigation on the feasibility of this project. As seen below, both 2-F and 4-CF<sub>3</sub> were good candidates to proceed with our reaction optimization.

**Table S8.** Preliminary results: Boronic acid screening.

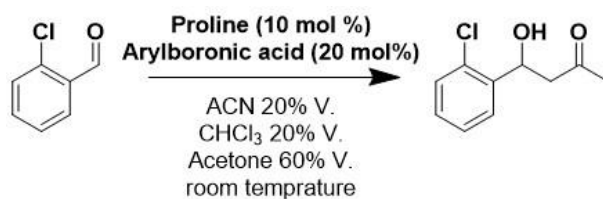

| Boronic Acid | Yield <sup>a</sup> % |    | ee <sup>b</sup> % |    |
|--------------|----------------------|----|-------------------|----|
|              | 83                   | 83 | 57                | 55 |
|              | 90                   | 92 | 60                | 62 |
|              | 78                   | 79 | 53                | 56 |
|              | 88                   | 88 | 57                | 59 |
|              | 84                   | 81 | 55                | 56 |
|              | 87                   | 93 | 61                | 60 |

Reaction conditions: Proline (0.05 mmol, 5.8 mg), phenyl boroxine (0.0333 mmol, 12.1 mg), 0.8 mL of a solvent mixture (20% DMSO / 20% CHCl<sub>3</sub> / 60% acetone), 0.5 mmol of aryl aldehyde; <sup>a</sup>isolated yield;

<sup>b</sup>determined by chiral HPLC.

## 12. Screening of boronic acid / proline ratio using acetone as a substrate

The selection of the ratio of 2:1 of 2-fluoroboronic acid to proline was made on the basis of the optimization presented below. In this optimization, acetone was used as aldol donor and it was part of our preliminary investigation on the feasibility of this project. As seen below, a ratio of 1:1 led to a slight decrease in e.e., whereas a ratio higher than 2:1 boronic acid to proline led to decreased yields. In all cases when the yield was lower unreacted aldehyde accounts for >95% of the remaining mass balance.

**Table S9.** Preliminary results: Boronic acid / proline ratio screening.

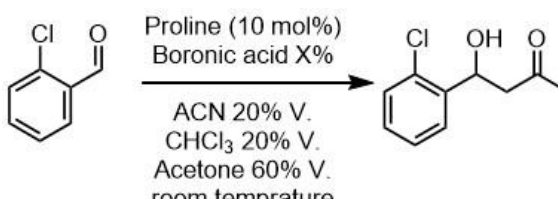

Proline (10 mol%)  
Boronic acid X%  
ACN 20% V.  
CHCl<sub>3</sub> 20% V.  
Acetone 60% V.  
room temperature

| Boronic Acid | Yield <sup>a</sup> % |    | ee <sup>b</sup> % |    |
|--------------|----------------------|----|-------------------|----|
| 1 eq         | 91                   | 91 | 56                | 60 |
| 2 eq         | 88                   | 89 | 66                | 68 |
| 4 eq         | 66                   | 61 | 62                | 66 |
| 6 eq         | 45                   | 33 | 66                | 70 |

Reaction conditions: Proline (0.05 mmol, 5.8 mg), phenyl boroxine (xx mmol, xx mg), 0.8 mL of a solvent mixture (20%DMSO / 20% CHCl / 60% acetone), 0.5 mmol of aryl aldehyde; <sup>a</sup>isolated yield; <sup>b</sup>determined by chiral HPLC.

### 13. Mechanistic investigation

#### 13.1 NMR studies

CD<sub>3</sub>CN was used as NMR solvent. The following measurements were performed with a D1= 50, at 20 °C and with the same concentration as used in the general procedure.

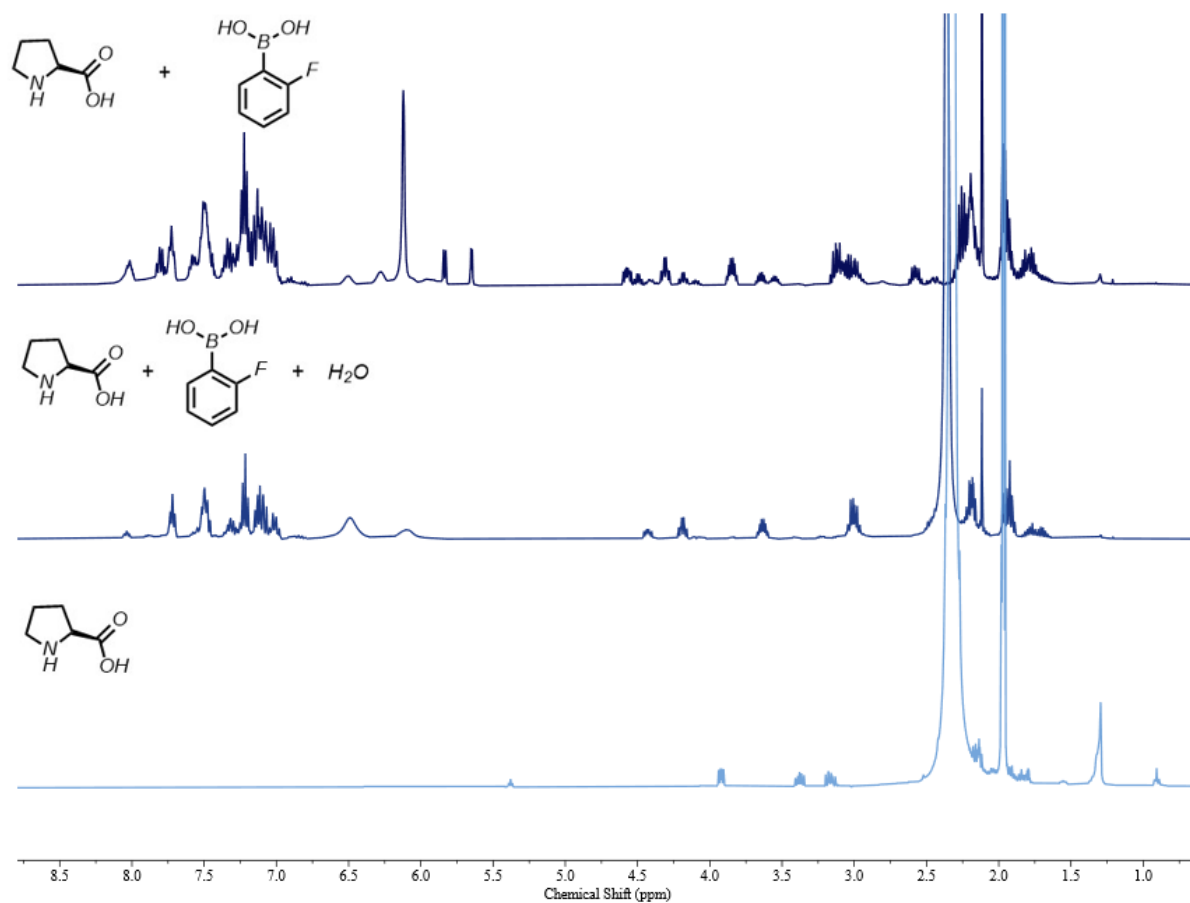

**Figure S2.** NMR studies (full spectra): **Bottom** - Proline + H<sub>2</sub>O; **Middle** - Proline + 2-Fluorophenyl boroxine + H<sub>2</sub>O; **Top** - Proline + 2-Fluorophenyl boroxine

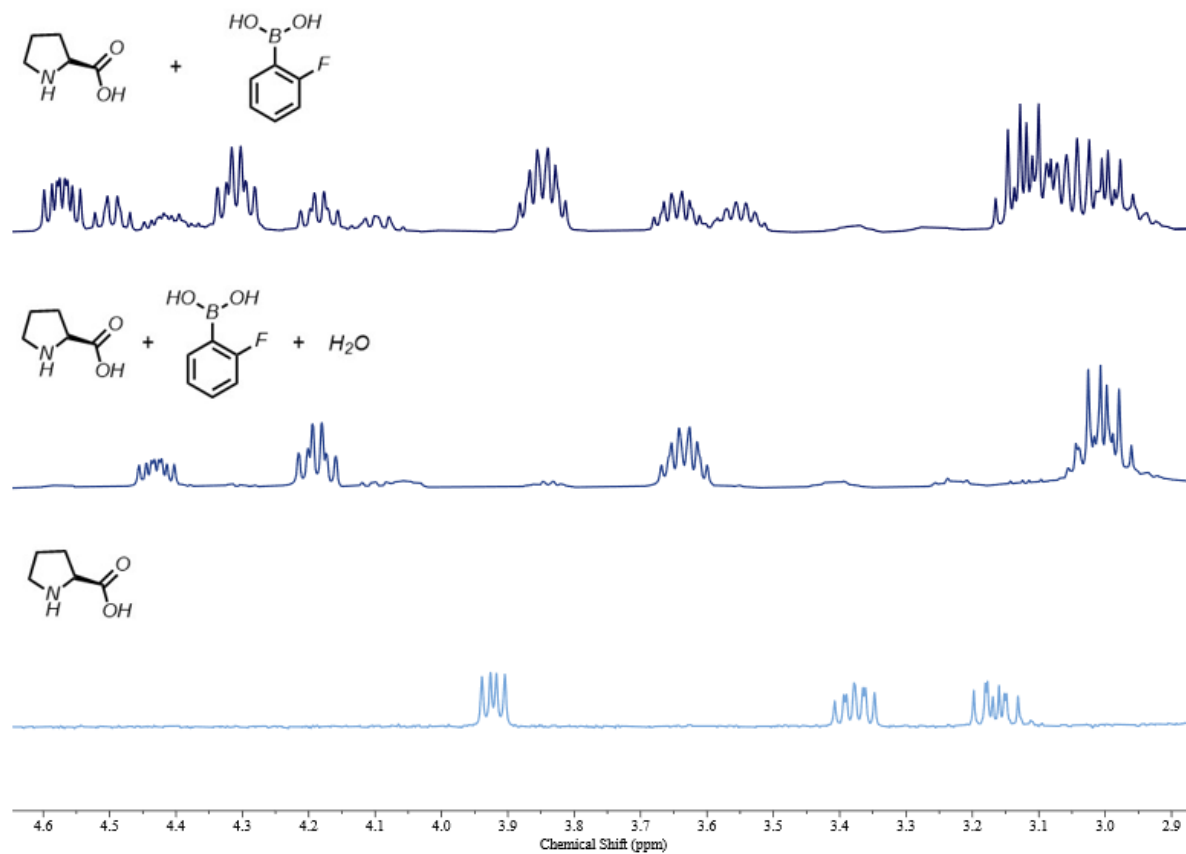

**Figure S3.** NMR studies (zoom in between 2.8 and 4.7 ppm): **Bottom** - Proline +  $\text{H}_2\text{O}$ ; **Middle** - Proline + 2-Fluorophenyl boroxine +  $\text{H}_2\text{O}$ ; **Top** - Proline + 2-Fluorophenyl boroxine

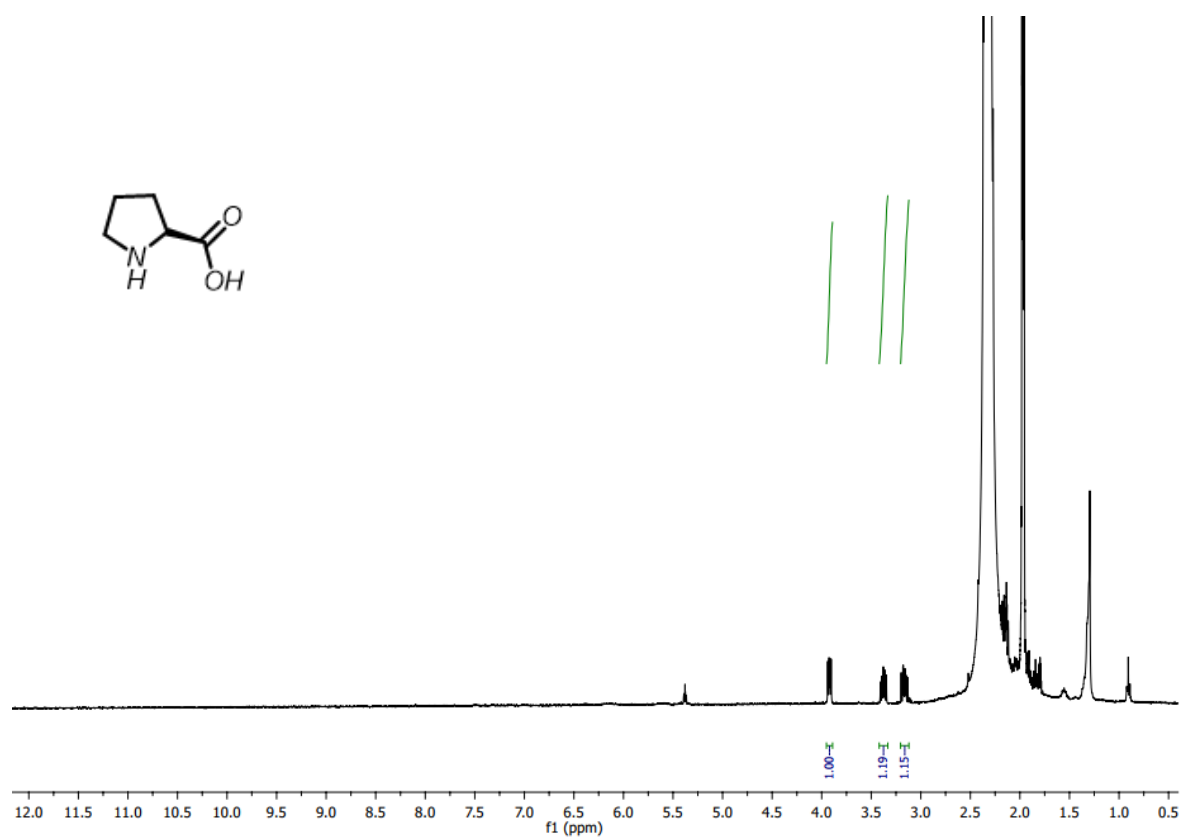

**Figure S4.** NMR studies (full spectra): Proline + H<sub>2</sub>O.

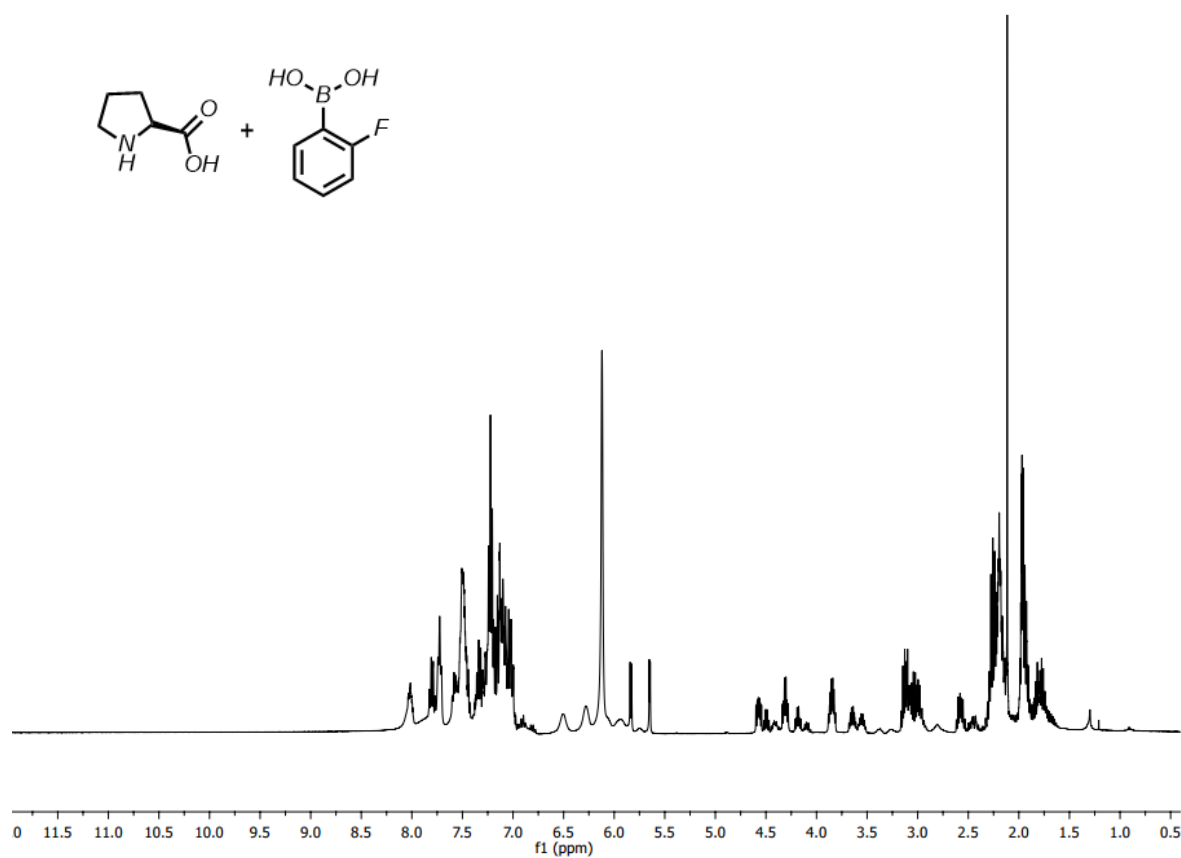

**Figure S5.** NMR studies (full spectra): Proline + 2-fluorophenylboronic acid.

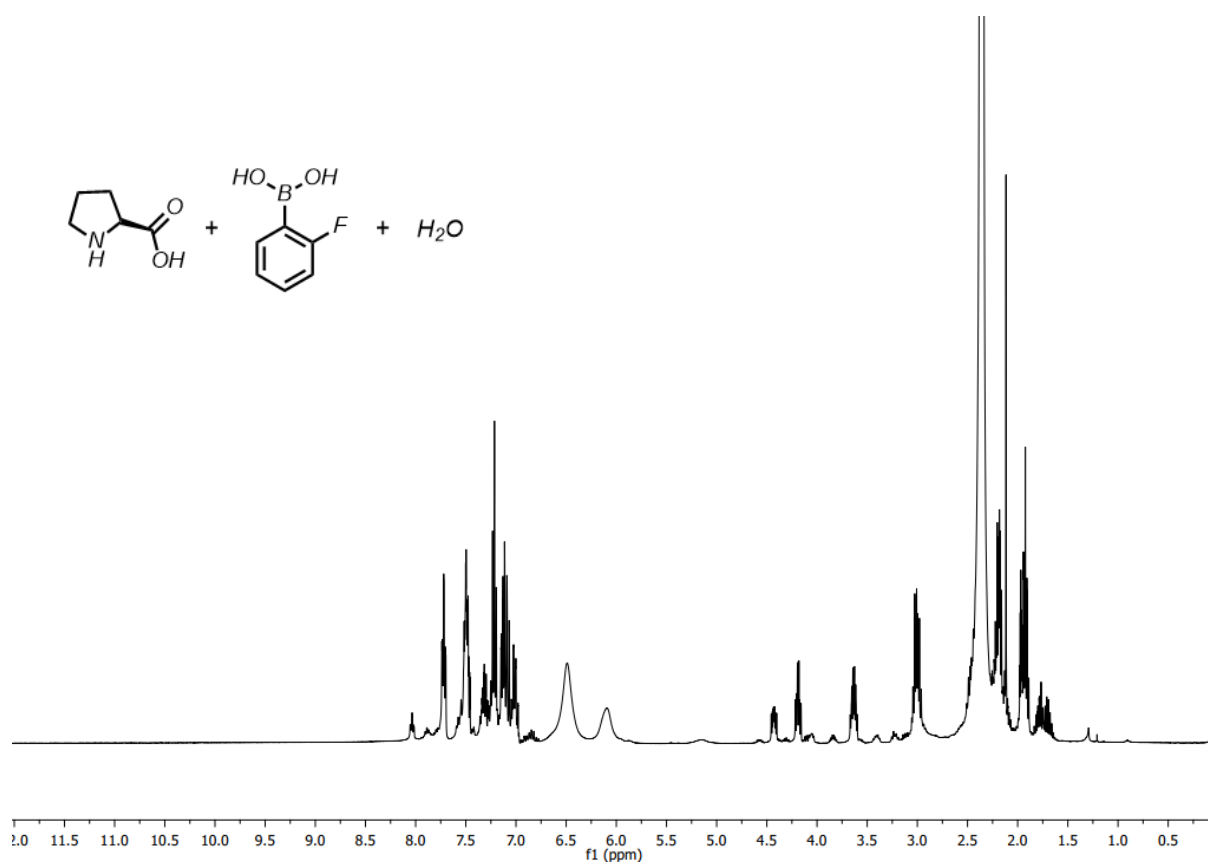

**Figure S6.** NMR studies (full spectra): Proline + 2-fluorophenylboronic acid + water.



### 13.2 Non-linear experiments (NLE)

These reactions were performed according to the general procedure. Reactions were run with a scalemic mixture of catalyst. A graph was plotted of the average %ee of the product versus the %ee<sub>cat</sub>. A non-linear effect was not observed in this system.

**Table S10.** Non-linear experiments

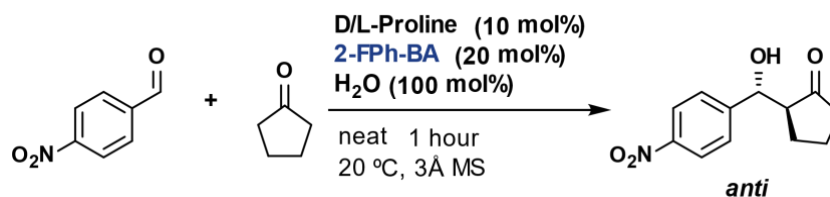

| D-proline<br>(mg) | L-proline<br>(mg) | %ee <sub>cat</sub> | ee <sup>[a]</sup> % |
|-------------------|-------------------|--------------------|---------------------|
| 0                 | 5.8               | 99                 | 96                  |
| 0.725             | 5.075             | 75                 | 74.4                |
| 1.45              | 4.35              | 50                 | 51                  |
| 2.175             | 3.625             | 25                 | 29                  |
| 2.9               | 2.9               | 0                  | 1                   |

Reaction conditions: Proline (0.05 mmol, 5.8 mg), 2-F-phenyl boroxine (0.0333 mmol, 12.1 mg), 1,3,5-trimethoxybenzene (20 mg, 0.119 mmol), 25 mg of molecular sieves 3 Å, 0.8 mL cyclopentanone, 9 µL H<sub>2</sub>O and 0.5 mmol of aryl aldehyde; <sup>a</sup>determined by chiral HPLC.

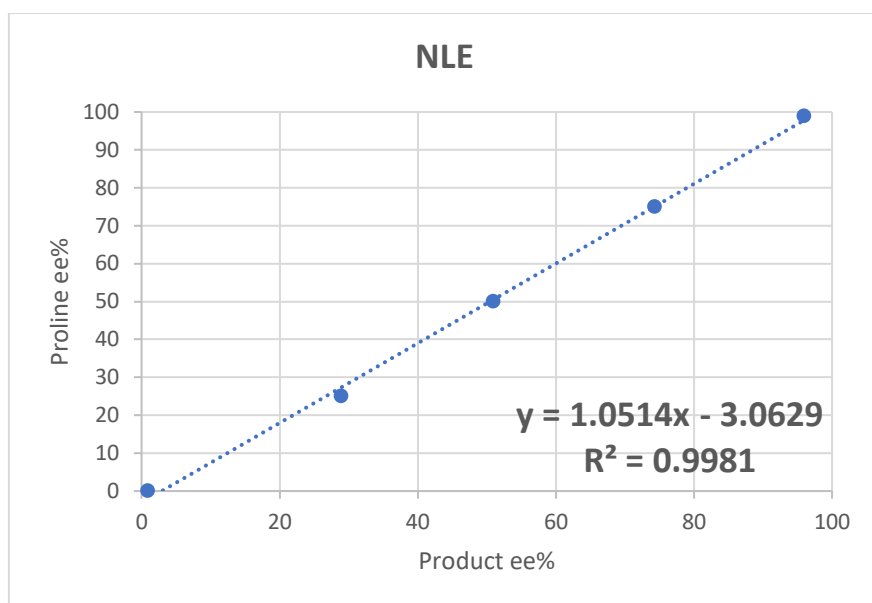

**Figure S7.** Non-linear experiment plot

### 13.3 High-resolution MS experiments

CH<sub>3</sub>CN used as a solvent. A mixture of 1 to 1 proline and 2-Fluorophenyl boroxine diluted with the solvent and injected to the machine. In addition, a similar sample made but with stoichiometric amount of H<sub>2</sub>O.

a. without water

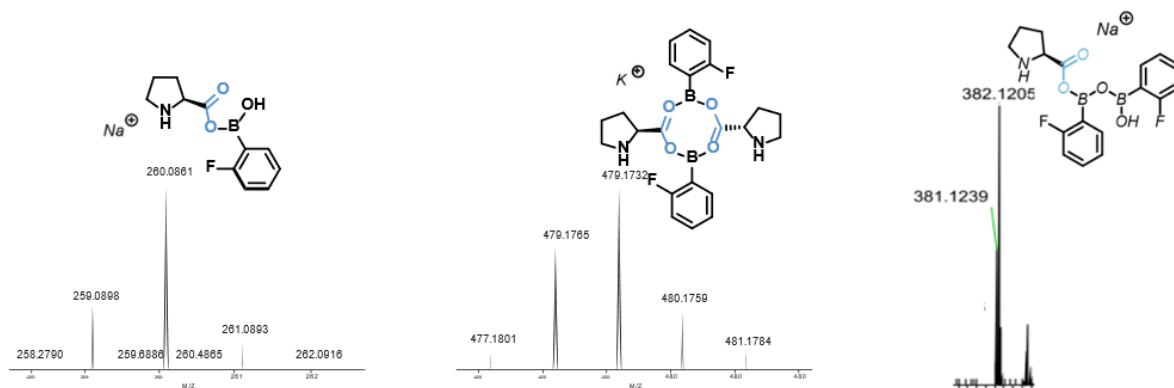

b. with water

ACN #1 RT: 0.00 AV: 1 NL: 2.80E+008  
T: FTMS + p ESI Full ms [100.0000-600.0000]

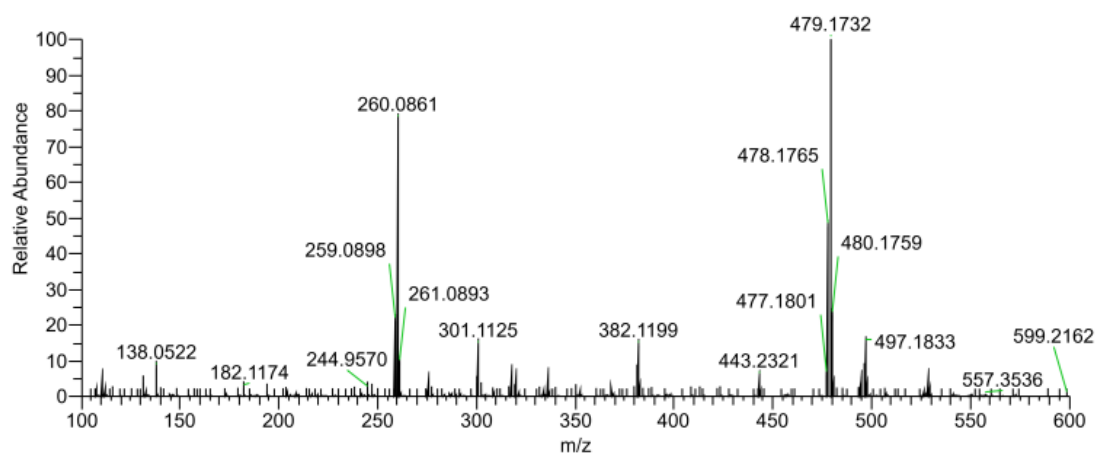

ACN + H2O #1 RT: 0.01 AV: 1 NL: 2.41E+008  
T: FTMS + p ESI Full ms [100.0000-800.0000]

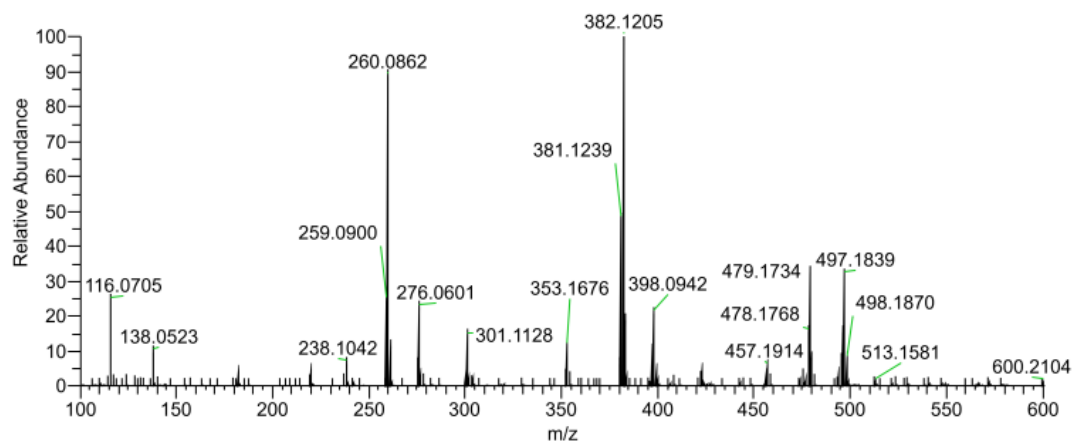

### 13.4 Influence of boronic acid and water on the reaction intermediates

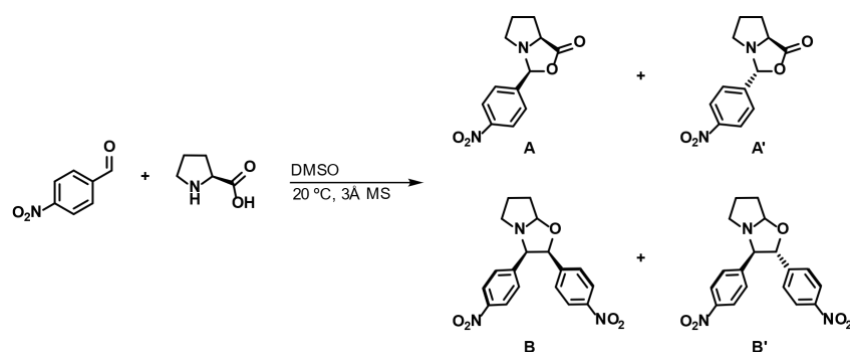

In previous work,<sup>2-4</sup> several reaction intermediates that are considered unreactive have been identified, of those, the main ones are oxazolidinones that can decompose reversibly back to proline (A and A') and oxapyrrolizidines (B and B') that are formed irreversibly. To probe the influence of our reaction conditions on the formation of these intermediates we conducted the following experiments.

We first performed a stoichiometric experiment between proline and *p*-nitro benzaldehyde at a 1:1 ratio to isolate the different products. **Procedure:** proline (58 mg, 0.5 mmol), and *p*-nitro benzaldehyde (76 mg, 0.5 mmol) were placed in screw capped vial loaded with a magnetic stir bar. 3 ml of DMSO were added and the mixture was stirred for 24 hours. Upon aqueous work-up and column chromatography we isolated B and B' (clean on pages S112-S115), while A and A' could not be purified. This procedure was based on previous literature.<sup>4</sup>

At the second step we conducted a set of 4 NMR experiments to probe the influence of each reaction component on the formation of the different intermediates:

1. To a 1:1 mixture of proline and aldehyde we added 2 equiv of boronic acid. This was followed by adding 10 equiv of water
2. To a 1:2 mixture of proline and boronic acid (respectively) we added 1 equiv of aldehyde
3. To a 1:2:10 mixture of proline, boronic acid and water (respectively) we added 1 equiv of aldehyde
4. To a 1:10 mixture of proline and water (respectively) we added 1 equiv of aldehyde

In the next pages we will provide the procedure and NMR spectra for each of these experiment.

1. **(a)** 1:1 proline (0.03 mmol) to *p*-nitro benzaldehyde (0.03 mmol) in 0.5 ml of DMSO<sub>d6</sub> were mixed for 5 minutes and then NMR spectrum was recorded. **(b)** 2 equivalent of 2-F phenylboronic acid was added and an NMR spectrum was recorded after 5 minutes. **(c)** 10 equivalent of H<sub>2</sub>O was added and again an NMR spectrum was recorded after 5 minutes.

Crude NMR spectra:

**Figure S8. 1(a)** proline and aldehyde (1:1)

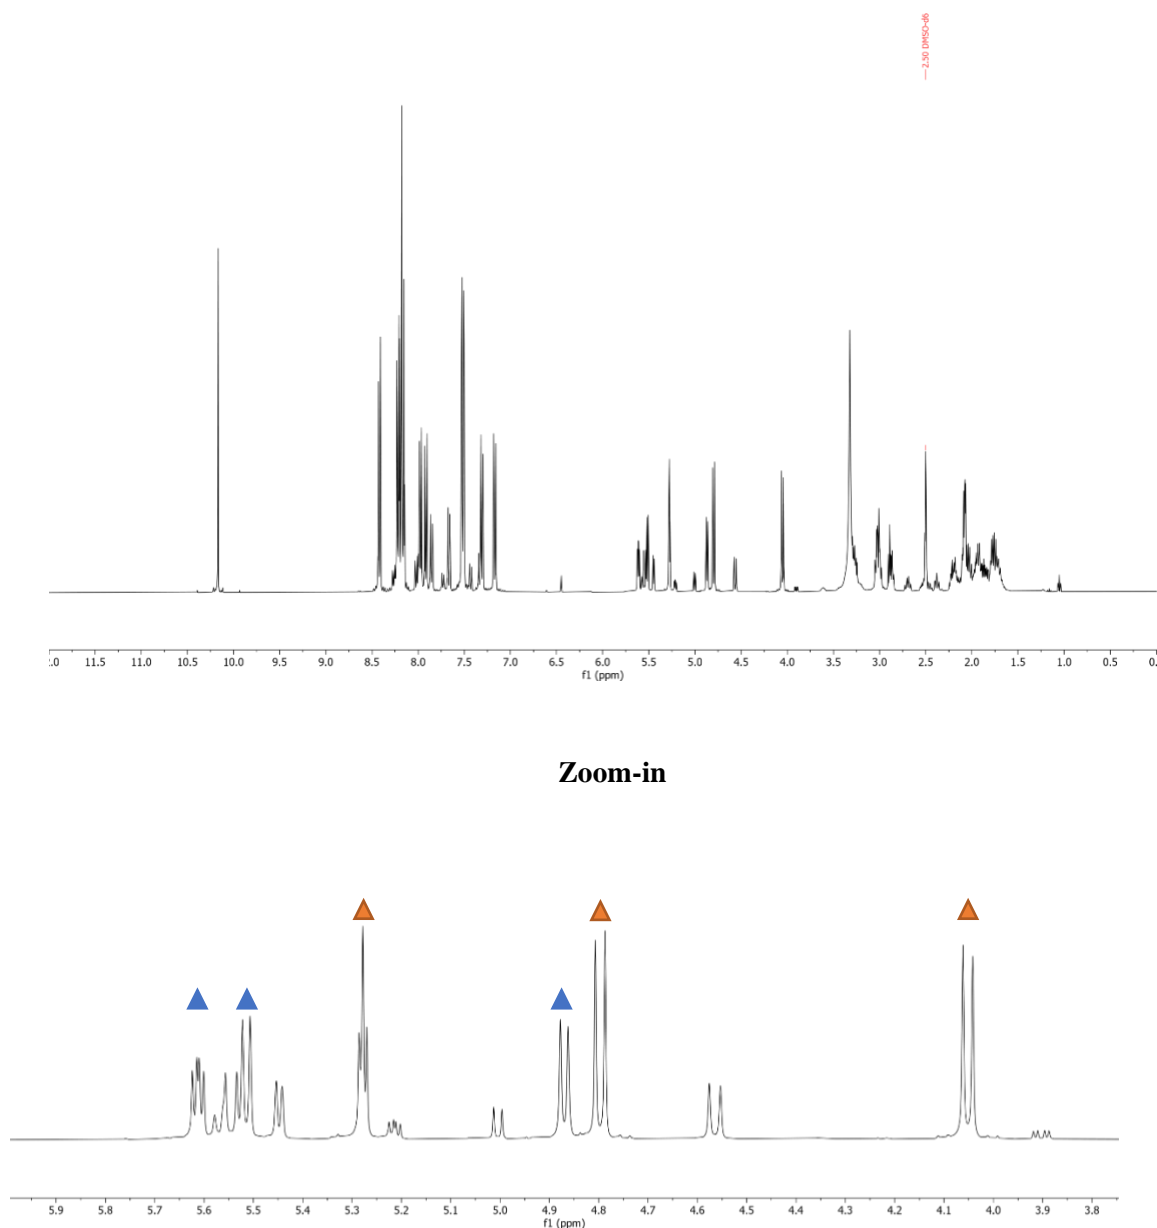

Peaks marked with ▲ corresponded to the *anti* oxapyrrolizidine (**B**).

Peaks marked with ▲ corresponded to the *syn* oxapyrrolizidine (**B'**).

The rest of the peaks are assumed to be the reversible oxazolidinones based on similarity to literature.<sup>4</sup> As shown in the following figure, these peaks disappeared after the addition of boronic acid, while the irreversible peaks were not affected even after the addition of H<sub>2</sub>O, as expected. The additional peaks between 4.1 to 4.5 ppm correspond to the species forming between the boronic acid and proline.

**Figure S9. 1(a-c)**

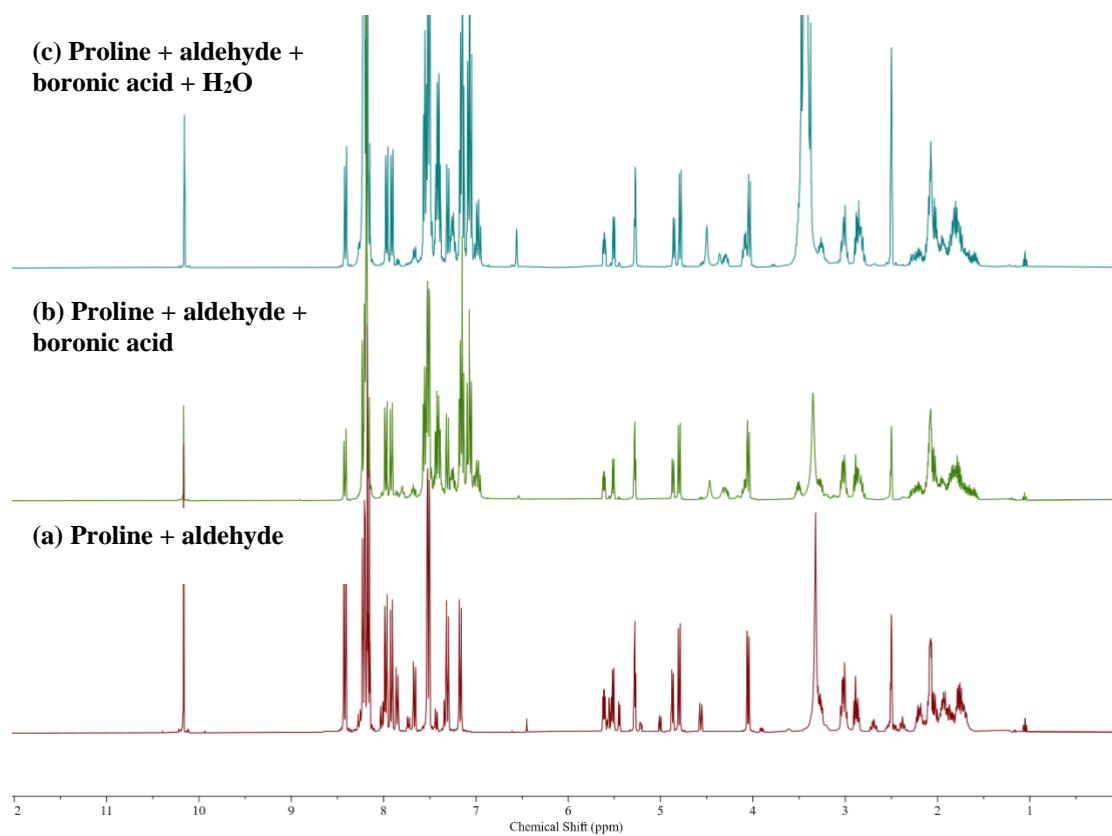

**Zoom-in**

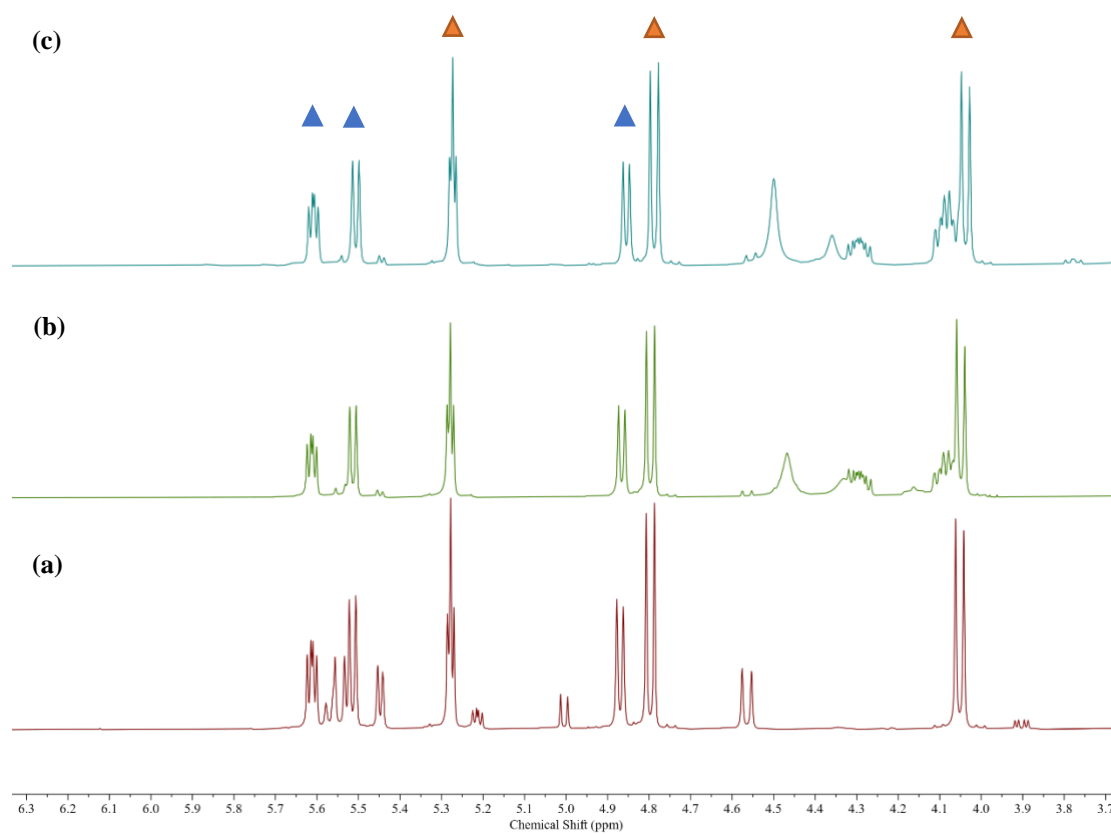

2. (a) 1:2 proline to 2-FPh boronic acid in DMSO<sub>d6</sub> for 5 minutes then NMR spectrum was recorded. (b) 1 equivalent of p-nitro benzaldehyde was added and an NMR spectrum was recorded after 5 minutes.

From this experiment we see that the change in the order of addition does not affect the formation of the irreversible side product.

**Figure S10. 2(a-b)**

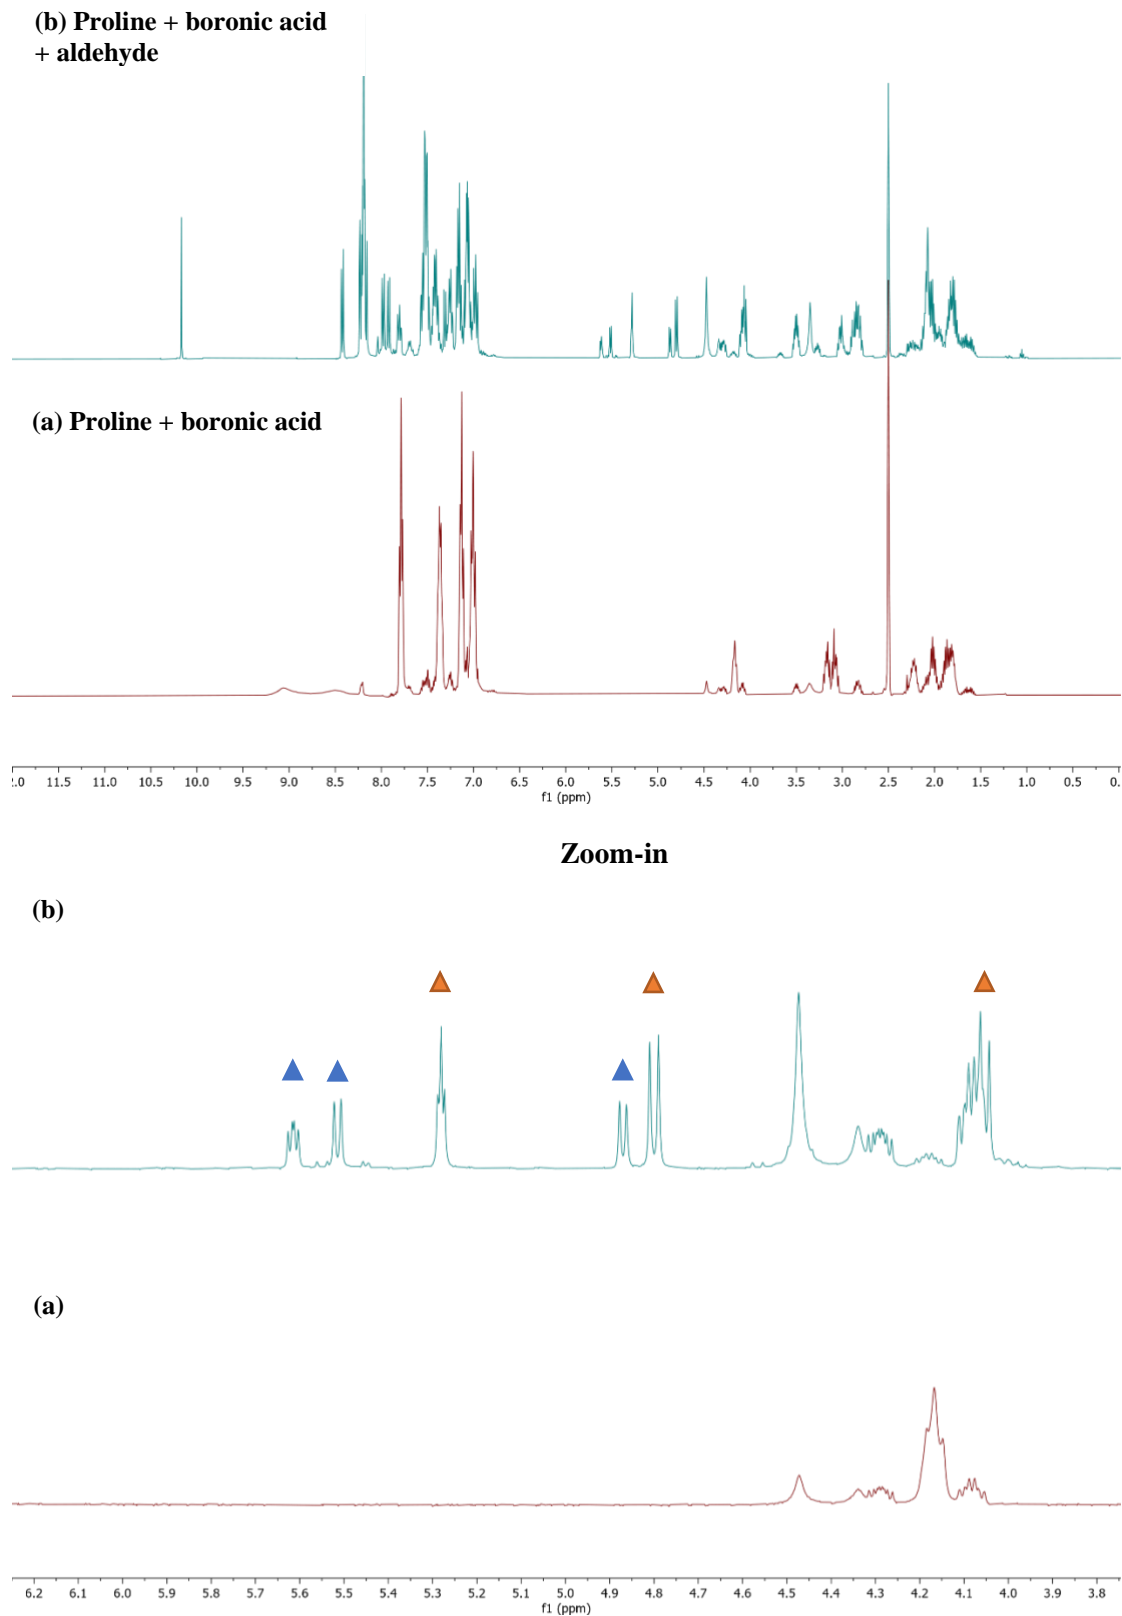

3. (a) 1:2:10 of proline, 2-FPh boronic acid, and H<sub>2</sub>O were mixed in DMSO<sub>d6</sub> for 5 minutes then an NMR spectrum was recorded. (b) 1 equivalent of *p*-nitro benzaldehyde was added, and then an NMR spectrum was recorded after 5 minutes.

These results showed that upon prior addition of boronic acid and water no formation of both reversible and irreversible side products.

Figure S11. 3(a-b)

(b) Proline + boronic acid + H<sub>2</sub>O + aldehyde

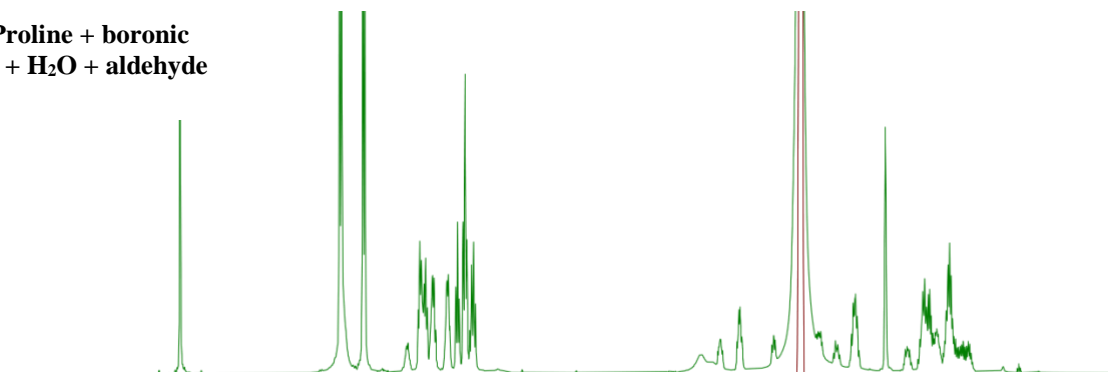

(a) Proline + boronic acid + H<sub>2</sub>O

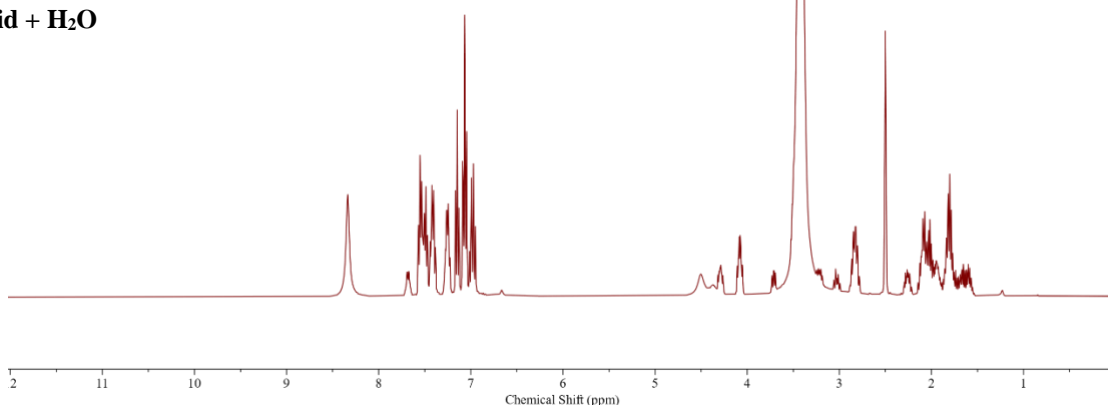

Zoom-in

(b)

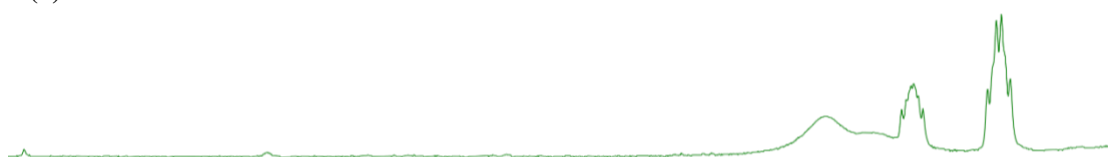

(a)

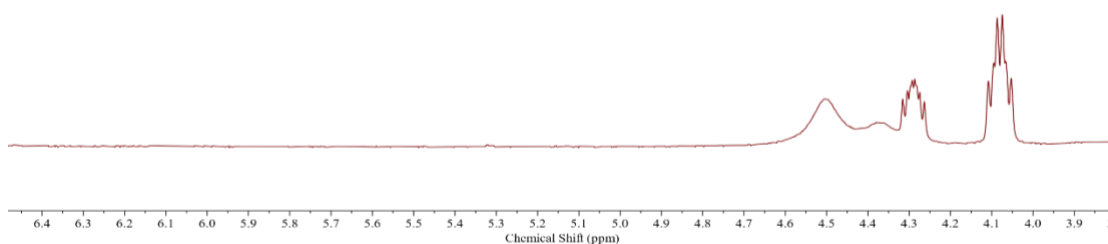



4. (a) 1:10 proline and H<sub>2</sub>O was mixed in DMSO<sub>d6</sub> for 5 minutes then an NMR spectrum was recorded.  
(b) 1 equivalent of *p*-nitro benzaldehyde was added, and an NMR spectrum recorded after 5 minutes.

The results from this control experiment show that water alone can suppress the formation of both reversible and irreversible side-product. This conclusion fits with previous work by Blackmond and coworkers<sup>4</sup> which also observed the suppression of side products when adding water to the catalytic proline system.

Figure S12. 4(a-b)

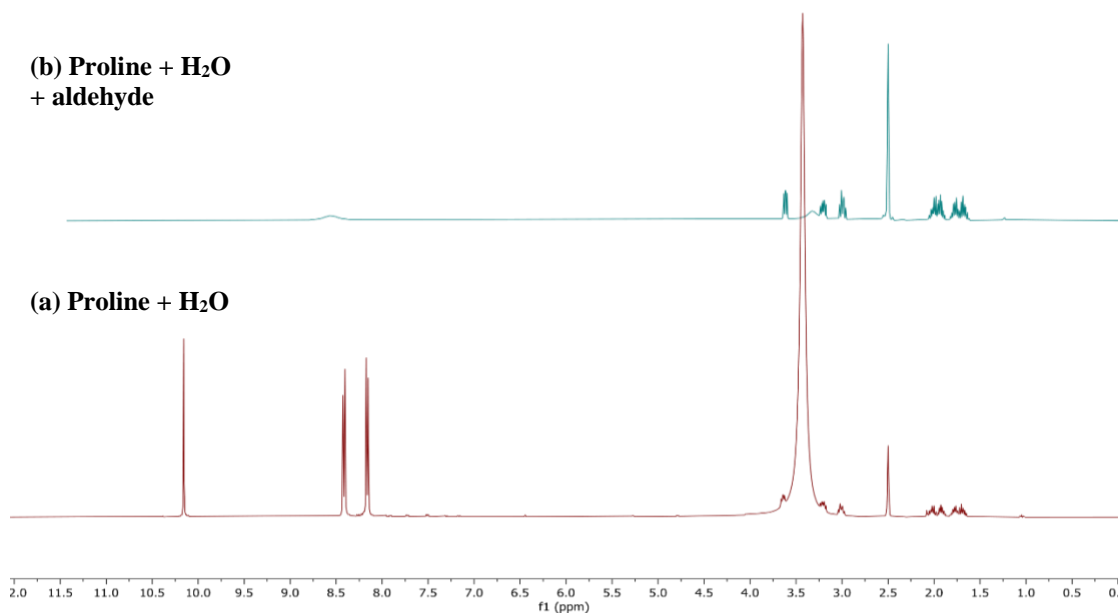

Zoom-in

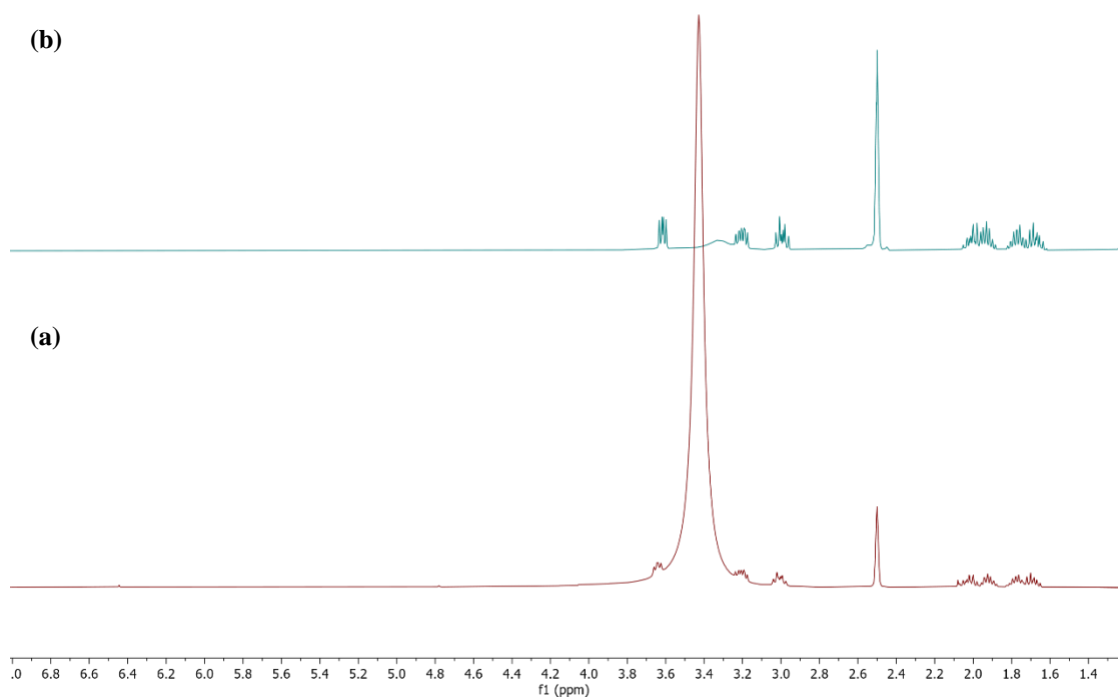

#### 14. Characterization

All of the compound prepared according to the procedure mentioned below and compared to literature<sup>5-8</sup>.

##### *p*-iodo benzaldehyde

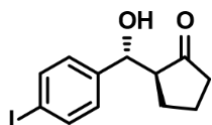

The resulting pure product was examined by <sup>1</sup>H and <sup>13</sup>C NMR. The spectroscopic NMR data agree with the previously reported ones.

<sup>1</sup>H NMR (400 MHz, CDCl<sub>3</sub>) δ 7.61 (d, J = 8.3 Hz, 2H), 7.03 (d, J = 8.3 Hz, 2H), 4.59 (d, J = 9.1 Hz, 1H), 4.49 (s, 1H), 2.45 – 2.25 (m, 2H), 2.17 (ddd, J = 19.5, 10.8, 9.0 Hz, 1H), 1.96 – 1.84 (m, 1H), 1.66 (dddd, J = 14.3, 8.4, 7.3, 3.5 Hz, 2H), 1.47 – 1.34 (m, 1H).

<sup>13</sup>C NMR (101 MHz, CDCl<sub>3</sub>) δ 141.21, 137.55, 128.52, 93.51, 74.74, 55.24, 38.71, 26.93, 20.41.

##### *p*-nitro benzaldehyde

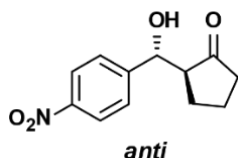

The resulting pure product was examined by <sup>1</sup>H and <sup>13</sup>C NMR. The spectroscopic NMR data agree with the previously reported ones.

<sup>1</sup>H NMR (400 MHz, CDCl<sub>3</sub>) δ 8.15 (d, J = 8.6 Hz, 2H), 7.47 (d, J = 8.7 Hz, 2H), 4.78 (d, J = 9.2 Hz, 1H), 4.67 (s, 1H), 2.47 – 2.15 (m, 2H), 2.01 – 1.90 (m, 1H), 1.72 – 1.60 (m, 2H), 1.48 (q, J = 6.7 Hz, 2H).

<sup>13</sup>C NMR (101 MHz, CDCl<sub>3</sub>) δ 148.65, 127.36, 123.74, 74.47, 55.11, 38.60, 26.88, 20.38.

##### *p*-chloro benzaldehyde

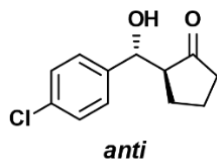

The resulting pure product was examined by <sup>1</sup>H and <sup>13</sup>C NMR. The spectroscopic NMR data agree with the previously reported ones.

<sup>1</sup>H NMR (400 MHz, CDCl<sub>3</sub>) δ 7.54 – 6.96 (m, 4H), 4.62 (d, J = 9.1 Hz, 1H), 4.51 (s, 1H), 2.46 – 2.26 (m, 2H), 2.17 (ddd, J = 19.5, 10.7, 9.0 Hz, 1H), 1.96 – 1.86 (m, 1H), 1.72 – 1.61 (m, 2H), 1.48 – 1.36 (m, 1H).

<sup>13</sup>C NMR (101 MHz, CDCl<sub>3</sub>) δ 140.01, 133.71, 128.64, 127.94, 74.63, 55.31, 38.71, 26.94, 20.41.

*o*-fluoro benzaldehyde

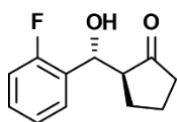

*anti*

The resulting pure product was examined by  $^1\text{H}$  and  $^{13}\text{C}$  NMR. The spectroscopic NMR data agree with the previously reported ones.

$^1\text{H}$  NMR (400 MHz,  $\text{CDCl}_3$ )  $\delta$  7.44 (td,  $J = 7.5, 1.9$  Hz, 1H), 7.17 (ddd,  $J = 7.4, 5.5, 2.1$  Hz, 1H), 7.09 (td,  $J = 7.5, 1.3$  Hz, 1H), 6.93 (ddd,  $J = 9.7, 8.2, 1.3$  Hz, 1H), 5.02 (d,  $J = 9.5$  Hz, 1H), 4.52 (s, 1H), 2.44 – 2.30 (m, 2H), 2.20 (ddd,  $J = 19.3, 10.3, 8.7$  Hz, 1H), 1.92 (dddd,  $J = 12.5, 10.3, 7.3, 2.2$  Hz, 1H), 1.76 – 1.60 (m, 2H), 1.54 (dddd,  $J = 12.6, 7.7, 5.7, 2.1$  Hz, 1H).

$^{13}\text{C}$  NMR (101 MHz,  $\text{CDCl}_3$ )  $\delta$  161.07, 158.62, 129.33, 128.20, 124.55, 68.12, 55.09, 38.64, 26.45, 20.42.

*o*-chloro benzaldehyde

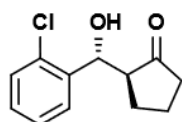

*anti*

The resulting pure product was examined by  $^1\text{H}$  and  $^{13}\text{C}$  NMR. The spectroscopic NMR data agree with the previously reported ones.

$^1\text{H}$  NMR (400 MHz,  $\text{CDCl}_3$ )  $\delta$  7.58 (dd,  $J = 7.7, 1.7$  Hz, 1H), 7.36 – 7.27 (m, 2H), 7.21 (td,  $J = 7.6, 1.8$  Hz, 1H), 5.30 (d,  $J = 9.3$  Hz, 1H), 4.52 (s, 1H), 2.53 – 2.36 (m, 2H), 2.37 – 2.23 (m, 1H), 2.06 – 1.95 (m, 1H), 1.83 – 1.60 (m, 2H).

$^{13}\text{C}$  NMR (101 MHz,  $\text{CDCl}_3$ )  $\delta$  139.18, 132.44, 129.34, 128.93, 128.38, 127.39, 70.37, 55.56, 38.68, 26.43, 20.55.

*o*-bromo benzaldehyde

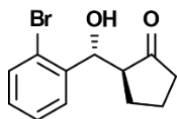

*anti*

The resulting pure product was examined by  $^1\text{H}$  and  $^{13}\text{C}$  NMR. The spectroscopic NMR data agree with the previously reported ones.

$^1\text{H}$  NMR (400 MHz,  $\text{CDCl}_3$ )  $\delta$  7.54 (ddd,  $J = 13.4, 7.9, 1.5$  Hz, 2H), 7.36 (td,  $J = 7.6, 1.3$  Hz, 1H), 7.15 (td,  $J = 7.7, 1.8$  Hz, 1H), 5.27 (d,  $J = 9.3$  Hz, 1H), 4.50 (s, 1H), 2.51 – 2.39 (m, 2H), 2.36 – 2.26 (m, 1H), 2.02 (tdt,  $J = 8.0, 5.5, 3.2$  Hz, 1H), 1.79 – 1.66 (m, 3H).

$^{13}\text{C}$  NMR (101 MHz,  $\text{CDCl}_3$ )  $\delta$  140.75, 132.64, 129.34, 128.67, 128.02, 122.77, 72.76, 55.65, 38.71, 26.53, 20.60.

*p*-trifluoromethyl benzaldehyde

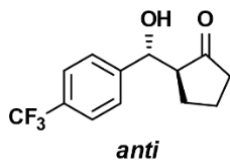

The resulting pure product was examined by  $^1\text{H}$  and  $^{13}\text{C}$  NMR. The spectroscopic NMR data agree with the previously reported ones.

$^1\text{H}$  NMR (400 MHz,  $\text{CDCl}_3$ )  $\delta$  7.54 (d,  $J = 8.1$  Hz, 2H), 7.40 (d,  $J = 8.1$  Hz, 2H), 4.71 (d,  $J = 9.2$  Hz, 1H), 4.60 (s, 1H), 2.46 – 2.28 (m, 2H), 2.19 (ddd,  $J = 19.5, 10.7, 8.9$  Hz, 1H), 1.93 (dddd,  $J = 16.0, 8.8, 5.8, 2.6$  Hz, 1H), 1.74 – 1.58 (m, 2H), 1.45 (qt,  $J = 11.5, 5.5$  Hz, 1H).

$^{13}\text{C}$  NMR (101 MHz,  $\text{CDCl}_3$ )  $\delta$  145.44, 126.89, 125.41, 74.71, 55.22, 38.66, 26.90, 20.39.

Benzaldehyde

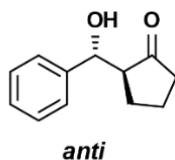

The resulting pure product was examined by  $^1\text{H}$  and  $^{13}\text{C}$  NMR. The spectroscopic NMR data agree with the previously reported ones.

$^1\text{H}$  NMR (400 MHz,  $\text{CDCl}_3$ )  $\delta$  7.27 (d,  $J = 4.4$  Hz, 4H), 7.25 – 7.20 (m, 1H), 4.64 (d,  $J = 9.2$  Hz, 1H), 2.44 – 2.30 (m, 2H), 2.25 – 2.09 (m, 1H), 1.89 (dddd,  $J = 16.3, 8.9, 4.2, 2.1$  Hz, 1H), 1.74 – 1.56 (m, 2H), 1.51 – 1.37 (m, 1H).

$^{13}\text{C}$  NMR (101 MHz,  $\text{CDCl}_3$ )  $\delta$  141.45, 128.47, 128.03, 126.59, 75.27, 55.37, 38.77, 27.03, 20.43.

*o*-methoxy benzaldehyde

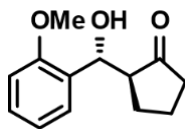

The resulting pure product was examined by  $^1\text{H}$  and  $^{13}\text{C}$  NMR. The spectroscopic NMR data agree with the previously reported ones.

$^1\text{H}$  NMR (400 MHz,  $\text{CDCl}_3$ )  $\delta$  7.43 (dd,  $J = 7.6, 1.8$  Hz, 1H), 7.27 – 7.21 (m, 1H), 6.98 (td,  $J = 7.5, 1.1$  Hz, 1H), 6.86 (dd,  $J = 8.3, 1.1$  Hz, 1H), 5.19 (d,  $J = 9.1$  Hz, 1H), 4.37 (s, 1H), 3.81 (s, 3H), 2.57 – 2.46 (m, 1H), 2.45 – 2.34 (m, 1H), 2.25 (ddd,  $J = 19.0, 10.0, 8.7$  Hz, 1H), 2.00 – 1.91 (m, 1H), 1.79 – 1.57 (m, 3H).

$^{13}\text{C}$  NMR (101 MHz,  $\text{CDCl}_3$ )  $\delta$  156.52, 129.86, 128.73, 127.68, 121.00, 110.57, 68.48, 55.39, 38.71, 26.55, 20.52.

*m*-chloro benzaldehyde

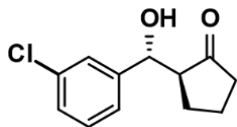

The resulting pure product was examined by  $^1\text{H}$  and  $^{13}\text{C}$  NMR. The spectroscopic NMR data agree with the previously reported ones.

$^1\text{H}$  NMR (400 MHz,  $\text{CDCl}_3$ )  $\delta$  7.29 (q,  $J = 1.5$  Hz, 1H), 7.21 – 7.19 (m, 2H), 7.14 (dtd,  $J = 5.4, 3.9, 1.4$  Hz, 1H), 4.61 (d,  $J = 9.2$  Hz, 1H), 4.55 (s, 0H), 2.43 – 2.24 (m, 2H), 2.24 – 2.11 (m, 1H), 1.99 – 1.83 (m, 1H), 1.76 – 1.57 (m, 2H), 1.49 – 1.38 (m, 1H).

$^{13}\text{C}$  NMR (101 MHz,  $\text{CDCl}_3$ )  $\delta$  143.57, 134.41, 129.73, 128.17, 126.73, 124.79, 74.69, 55.24, 38.69, 26.95, 20.40.

*p*-methyl benzaldehyde

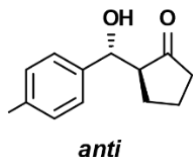

The resulting pure product was examined by  $^1\text{H}$  and  $^{13}\text{C}$  NMR. The spectroscopic NMR data agree with the previously reported ones.

$^1\text{H}$  NMR (400 MHz,  $\text{CDCl}_3$ )  $\delta$  7.24 – 7.20 (m, 2H), 7.15 (d,  $J = 7.9$  Hz, 2H), 4.67 (d,  $J = 9.1$  Hz, 1H), 2.48 – 2.37 (m, 2H), 2.34 (s, 3H), 2.29 – 2.17 (m, 1H), 1.95 (dddd,  $J = 12.6, 8.5, 6.6, 2.2$  Hz, 1H), 1.79 – 1.65 (m, 2H), 1.56 – 1.42 (m, 1H).

$^{13}\text{C}$  NMR (101 MHz,  $\text{CDCl}_3$ )  $\delta$  138.53, 137.66, 129.12, 126.52, 75.04, 55.35, 38.79, 27.04, 21.17, 20.43.

*m*-methoxy benzaldehyde

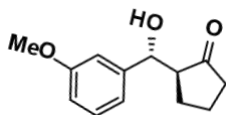

The resulting pure product was examined by  $^1\text{H}$  and  $^{13}\text{C}$  NMR. The spectroscopic NMR data agree with the previously reported ones.

$^1\text{H}$  NMR (400 MHz,  $\text{CDCl}_3$ )  $\delta$  7.28 – 7.22 (m, 1H), 6.94 – 6.88 (m, 2H), 6.83 (ddd,  $J = 8.2, 2.6, 1.1$  Hz, 1H), 4.68 (d,  $J = 9.1$  Hz, 1H), 4.53 (s, 1H), 3.81 (s, 3H), 2.48 – 2.36 (m, 2H), 2.25 (ddd,  $J = 19.4, 10.5, 8.7$  Hz, 1H), 2.04 – 1.89 (m, 1H), 1.84 – 1.64 (m, 2H), 1.56 – 1.43 (m, 1H).

$^{13}\text{C}$  NMR (101 MHz,  $\text{CDCl}_3$ )  $\delta$  159.78, 143.08, 129.44, 118.97, 113.57, 111.96, 75.18, 55.35, 55.26, 38.77, 27.06, 20.43.

#### Thiophene-2-carbaldehyde

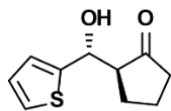

*anti*

The resulting pure product was examined by  $^1\text{H}$  and  $^{13}\text{C}$  NMR. The spectroscopic NMR data agree with the previously reported ones.

$^1\text{H}$  NMR (400 MHz,  $\text{CDCl}_3$ )  $\delta$  7.20 (dd,  $J = 4.7, 1.5$  Hz, 1H), 6.91 – 6.85 (m, 2H), 4.94 (d,  $J = 9.0$  Hz, 1H), 4.57 (d,  $J = 1.3$  Hz, 1H), 2.48 – 2.32 (m, 2H), 2.17 (ddd,  $J = 19.4, 10.9, 8.7$  Hz, 1H), 1.96 – 1.80 (m, 2H), 1.70 (dddd,  $J = 17.7, 8.5, 4.6, 2.6$  Hz, 1H), 1.49 (qd,  $J = 11.8, 6.8$  Hz, 1H).

$^{13}\text{C}$  NMR (101 MHz,  $\text{CDCl}_3$ )  $\delta$  145.28, 126.39, 125.14, 124.41, 71.28, 55.85, 38.74, 27.01, 20.30.

#### Furfural

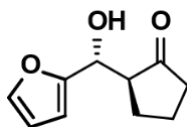

The resulting pure product was examined by  $^1\text{H}$  and  $^{13}\text{C}$  NMR. The spectroscopic NMR data agree with the previously reported ones.

$^1\text{H}$  NMR (400 MHz,  $\text{CDCl}_3$ )  $\delta$  7.38 (dd,  $J = 1.9, 0.8$  Hz, 1H), 6.31 (ddd,  $J = 16.0, 3.2, 1.3$  Hz, 2H), 4.78 (d,  $J = 9.1$  Hz, 1H), 4.33 (s, 1H), 2.75 – 2.65 (m, 1H), 2.44 (ddd,  $J = 19.2, 8.5, 2.1$  Hz, 1H), 2.24 (ddd,  $J = 19.3, 10.8, 8.8$  Hz, 1H), 2.06 – 1.89 (m, 2H), 1.86 – 1.76 (m, 1H), 1.52 (qd,  $J = 11.8, 7.0$  Hz, 1H).

$^{13}\text{C}$  NMR (101 MHz,  $\text{CDCl}_3$ )  $\delta$  142.39, 110.14, 107.53, 68.54, 52.86, 38.51, 26.55, 20.40.

#### *m*-nitro benzaldehyde

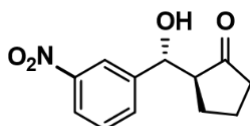

The resulting pure product was examined by  $^1\text{H}$  and  $^{13}\text{C}$  NMR. The spectroscopic NMR data agree with the previously reported ones.

$^1\text{H}$  NMR (400 MHz,  $\text{CDCl}_3$ )  $\delta$  8.24 (t,  $J = 2.1$  Hz, 1H), 8.17 (ddd,  $J = 8.1, 2.4, 1.1$  Hz, 1H), 7.72 – 7.69 (m, 1H), 7.54 (t,  $J = 7.9$  Hz, 1H), 4.83 (d,  $J = 9.3$  Hz, 1H), 4.78 (d,  $J = 1.0$  Hz, 1H), 2.53 – 2.37 (m, 2H), 2.35 – 2.18 (m, 1H), 2.08 – 1.94 (m, 1H), 1.82 – 1.69 (m, 2H), 1.57 (s, 1H).

$^{13}\text{C}$  NMR (101 MHz,  $\text{CDCl}_3$ )  $\delta$  143.69, 132.66, 129.48, 123.03, 121.63, 74.49, 55.10, 38.61, 29.70, 26.94, 20.38.

*m*-cyano benzaldehyde

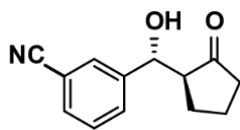

The resulting pure product was examined by  $^1\text{H}$  and  $^{13}\text{C}$  NMR. The spectroscopic NMR data agree with the previously reported ones.

$^1\text{H}$  NMR (400 MHz,  $\text{CDCl}_3$ )  $\delta$  7.67 (d,  $J = 1.8$  Hz, 1H), 7.60 (dd,  $J = 7.8, 1.7$  Hz, 2H), 7.49 – 7.44 (m, 1H), 4.75 (d,  $J = 9.3$  Hz, 1H), 4.72 (d,  $J = 1.1$  Hz, 1H), 2.52 – 2.21 (m, 3H), 2.11 – 1.91 (m, 1H), 1.84 – 1.66 (m, 2H), 1.61 – 1.44 (m, 1H).

$^{13}\text{C}$  NMR (101 MHz,  $\text{CDCl}_3$ )  $\delta$  143.08, 131.68, 130.99, 130.26, 129.31, 118.68, 112.63, 74.46, 55.14, 38.61, 29.70, 26.91, 20.37.

*p*-cyano benzaldehyde

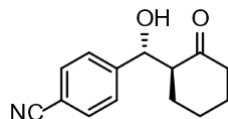

The resulting pure product was examined by  $^1\text{H}$  and  $^{13}\text{C}$  NMR. The spectroscopic NMR data agree with the previously reported ones.

$^1\text{H}$  NMR (400 MHz,  $\text{CDCl}_3$ )  $\delta$  7.68 – 7.60 (m, 2H), 7.46 – 7.41 (m, 2H), 4.83 (dd,  $J = 8.5, 3.1$  Hz, 1H), 4.04 (d,  $J = 3.1$  Hz, 1H), 2.62 – 2.44 (m, 2H), 2.40 – 2.31 (m, 1H), 2.11 (ddt,  $J = 12.1, 5.7, 2.9$  Hz, 1H), 1.89 – 1.79 (m, 1H), 1.76 – 1.47 (m, 2H), 1.43 – 1.28 (m, 1H).

$^{13}\text{C}$  NMR (101 MHz,  $\text{CDCl}_3$ )  $\delta$  215.01, 146.47, 132.35, 127.92, 118.87, 77.48, 77.16, 76.84, 74.40, 57.29, 42.83, 30.88, 27.79, 24.84.

*p*-chloro benzaldehyde

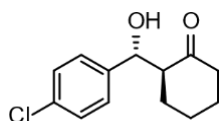

The resulting pure product was examined by  $^1\text{H}$  and  $^{13}\text{C}$  NMR. The spectroscopic NMR data agree with the previously reported ones.

$^1\text{H}$  NMR (400 MHz,  $\text{CDCl}_3$ )  $\delta$  7.34 – 7.29 (m, 2H), 7.29 – 7.21 (m, 2H), 4.76 (dd,  $J = 8.7, 2.8$  Hz, 1H), 3.98 (d,  $J = 2.8$  Hz, 1H), 2.60 – 2.44 (m, 2H), 2.35 (tdd,  $J = 13.6, 6.2, 1.3$  Hz, 1H), 2.09 (ddt,  $J = 12.2, 5.8, 2.8$  Hz, 1H), 1.79 (dq,  $J = 10.4, 3.3, 1.7$  Hz, 1H), 1.74 – 1.46 (m, 2H), 1.32 – 1.26 (m, 1H).

$^{13}\text{C}$  NMR (101 MHz,  $\text{CDCl}_3$ )  $\delta$  214.93, 139.08, 128.15, 127.99, 126.76, 73.75, 56.97, 42.28, 30.36, 27.33, 24.32.

*o*-methoxy benzaldehyde

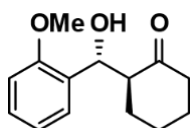

The resulting pure product was examined by  $^1\text{H}$  and  $^{13}\text{C}$  NMR. The spectroscopic NMR data agree with the previously reported ones.

$^1\text{H}$  NMR (400 MHz,  $\text{CDCl}_3$ )  $\delta$  7.40 (dd,  $J$  = 7.6, 1.8 Hz, 1H), 7.25 (ddd,  $J$  = 8.3, 7.4, 1.8 Hz, 1H), 6.98 (td,  $J$  = 7.5, 1.1 Hz, 1H), 6.86 (dd,  $J$  = 8.3, 1.1 Hz, 1H), 5.26 (dd,  $J$  = 8.5, 4.5 Hz, 1H), 3.83 (d,  $J$  = 4.5 Hz, 1H), 3.81 (s, 3H), 2.79 – 2.68 (m, 1H), 2.52 – 2.42 (m, 1H), 2.35 (dddd,  $J$  = 13.6, 12.4, 5.9, 1.3 Hz, 1H), 2.10 – 1.96 (m, 1H), 1.92 – 1.37 (m, 4H).

$^{13}\text{C}$  NMR (101 MHz,  $\text{CDCl}_3$ )  $\delta$  215.57, 154.70, 129.62, 128.63, 127.80, 120.92, 110.50, 68.62, 57.32, 42.60, 30.52, 27.96, 24.74.

*p*-nitro benzaldehyde

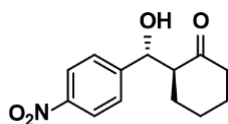

The resulting pure product was examined by  $^1\text{H}$  and  $^{13}\text{C}$  NMR. The spectroscopic NMR data agree with the previously reported ones.

$^1\text{H}$  NMR (400 MHz,  $\text{CDCl}_3$ )  $\delta$  8.36 – 8.09 (m, 2H), 7.59 – 7.42 (m, 2H), 4.90 (dd,  $J$  = 8.4, 3.1 Hz, 1H), 4.07 (d,  $J$  = 3.2 Hz, 1H), 2.68 – 2.45 (m, 2H), 2.36 (tdd,  $J$  = 13.6, 6.1, 1.2 Hz, 1H), 2.12 (ddt,  $J$  = 12.1, 5.8, 2.8 Hz, 1H), 1.88 – 1.77 (m, 1H), 1.78 – 1.48 (m, 3H), 1.46 – 1.29 (m, 1H).

$^{13}\text{C}$  NMR (101 MHz,  $\text{CDCl}_3$ )  $\delta$  214.35, 148.35, 147.16, 127.47, 123.18, 73.63, 56.79, 42.28, 30.36, 27.24, 24.29.

*p*-trifluoromethyl benzaldehyde

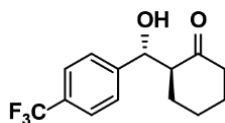

The resulting pure product was examined by  $^1\text{H}$  and  $^{13}\text{C}$  NMR. The spectroscopic NMR data agree with the previously reported ones.

$^1\text{H}$  NMR (400 MHz,  $\text{CDCl}_3$ )  $\delta$  7.64 – 7.58 (m, 2H), 7.52 – 7.39 (m, 2H), 4.85 (dd,  $J$  = 8.6, 3.0 Hz, 1H), 4.03 (d,  $J$  = 3.0 Hz, 1H), 2.65 – 2.44 (m, 2H), 2.36 (tdd,  $J$  = 13.5, 6.1, 1.2 Hz, 1H), 2.10 (ddt,  $J$  = 12.2, 5.8, 3.0 Hz, 1H), 1.87 – 1.75 (m, 1H), 1.74 – 1.47 (m, 3H), 1.40 – 1.28 (m, 1H).

$^{13}\text{C}$  NMR (101 MHz,  $\text{CDCl}_3$ )  $\delta$  215.23, 145.12, 127.51, 125.45, 122.89, 74.43, 57.42, 42.83, 30.91, 27.85, 24.87.



### 15. Chiral HPLC of the scope

All the reactions were performed in duplicate and HPLC traces are provided. The absolute configuration of Aldol product for the L-proline was determined by comparison to literature<sup>6-9</sup> and by analogy for new substrates. The retention time and peak area (in %) appear on each peak of the HPLC traces (table S6 and S7).

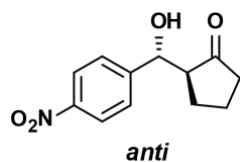

**HPLC conditions:** IC 10% IPA in Hexane. 1 ml/min. 254.

**HPLC traces for racemic:**

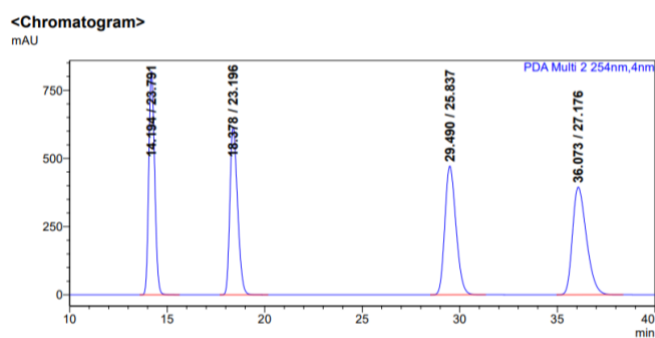

**HPLC traces for chiral (reaction and duplicate) (reaction and duplicate)**

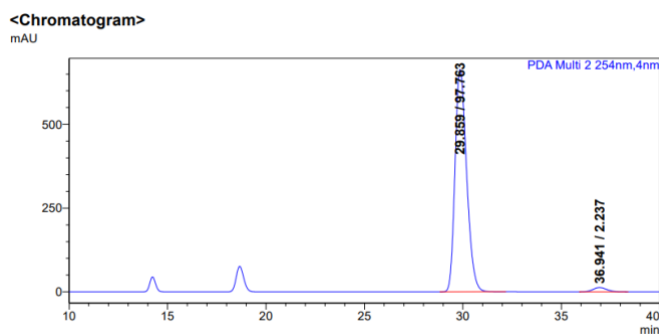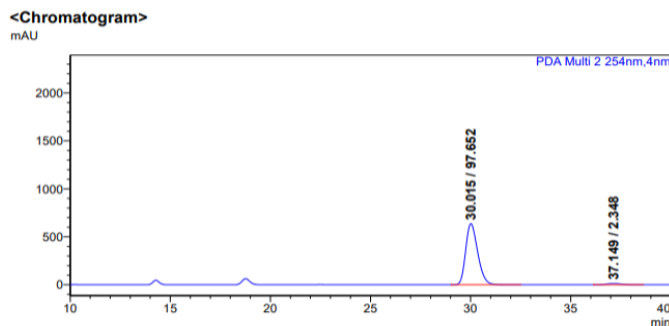

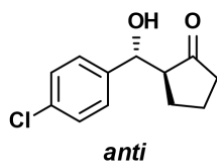

**HPLC conditions:** IC 10% IPA in Hexane. 1 ml/min. 210 nm.

### HPLC traces for racemic

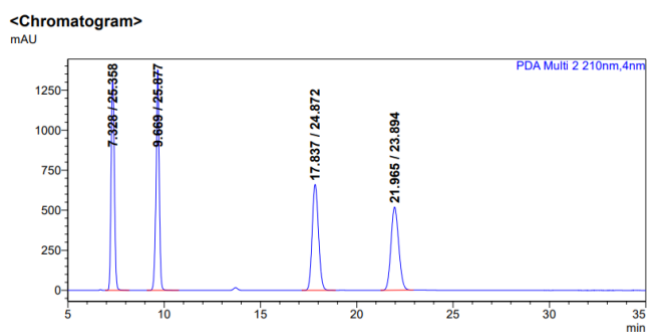

### HPLC traces for chiral (reaction and duplicate)

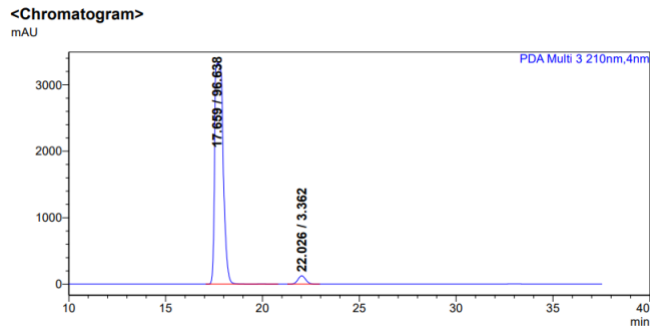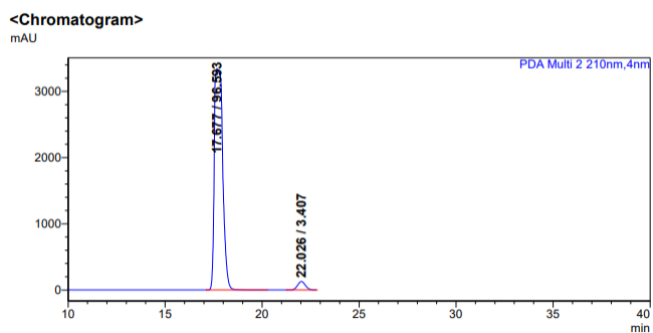

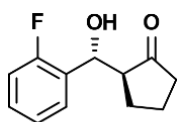

*anti*

**HPLC conditions:** IC 3% IPA in Hexane. 1 ml/min. 210 nm.

**HPLC traces for racemic**

<Chromatogram>

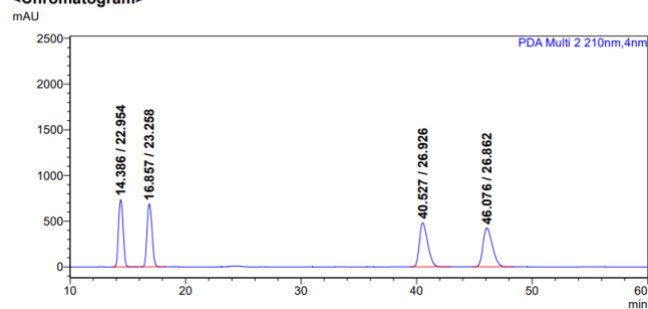

**HPLC traces for chiral (reaction and duplicate)**

<Chromatogram>

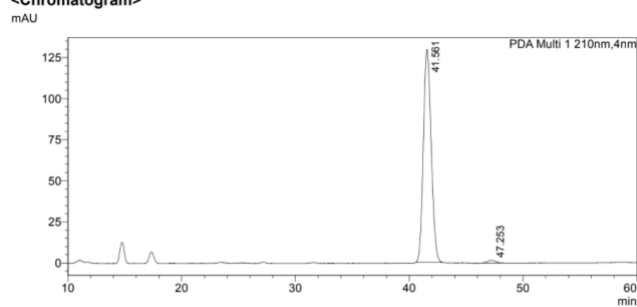

<Peak Table>

| PDA Ch1 210nm |           |         |        |       |      |      |
|---------------|-----------|---------|--------|-------|------|------|
| Peak#         | Ret. Time | Area    | Height | Conc. | Unit | Mark |
| 1             | 41.561    | 6230222 | 129553 | 0.000 |      |      |
| 2             | 47.253    | 79699   | 1557   | 0.000 |      | M    |
| Total         |           | 6309921 | 131110 |       |      |      |

<Chromatogram>

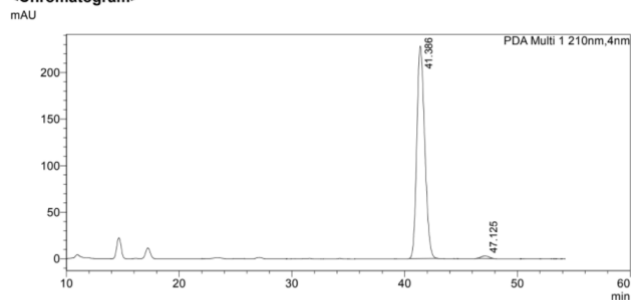

<Peak Table>

| PDA Ch1 210nm |           |          |        |       |      |      |
|---------------|-----------|----------|--------|-------|------|------|
| Peak#         | Ret. Time | Area     | Height | Conc. | Unit | Mark |
| 1             | 41.386    | 11140852 | 228124 | 0.000 |      |      |
| 2             | 47.125    | 125796   | 2685   | 0.000 |      | M    |
| Total         |           | 11266649 | 230809 |       |      |      |

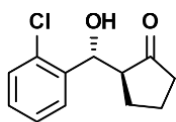

*anti*

**HPLC conditions:** IC 10% IPA in Hexane. 1 ml/min. 210 nm.

### HPLC traces for racemic

#### <Chromatogram>

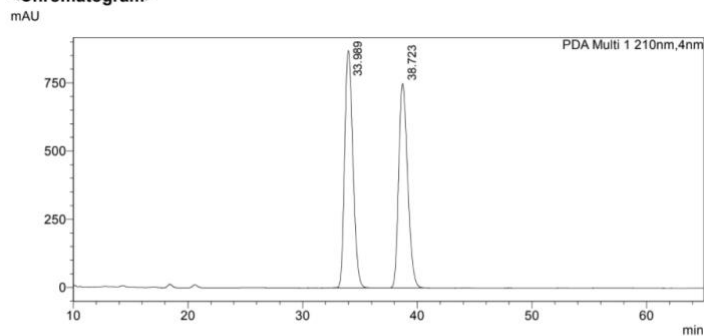

#### <Peak Table>

| PDA Ch1 210nm |           |          |         |       |      |      |
|---------------|-----------|----------|---------|-------|------|------|
| Peak#         | Ret. Time | Area     | Height  | Conc. | Unit | Name |
| 1             | 33.989    | 43446910 | 868293  | 0.000 |      | M    |
| 2             | 38.723    | 40689789 | 748104  | 0.000 |      |      |
| Total         |           | 84136699 | 1616397 |       |      |      |

### HPLC traces for chiral (reaction and duplicate)

#### <Chromatogram>

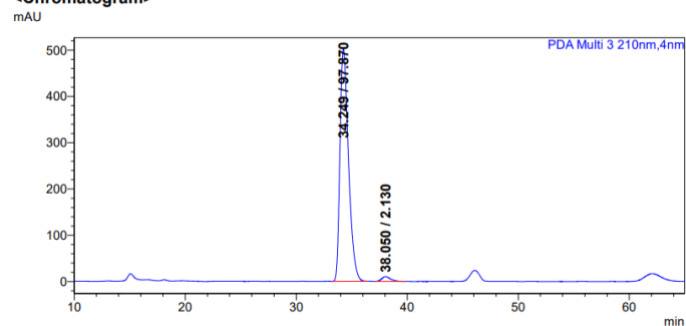

#### <Chromatogram>

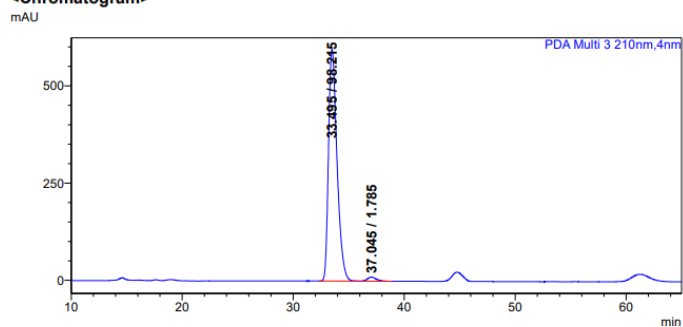

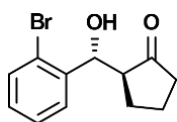

*anti*

**HPLC conditions:** IC 10% IPA in Hexane. 1 ml/min. 210 nm.

**HPLC traces for racemic**

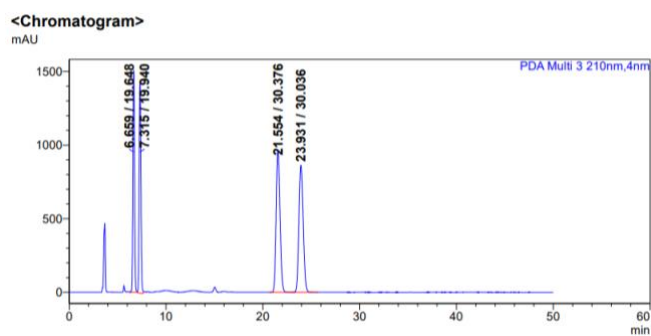

**HPLC traces for chiral (reaction and duplicate)**

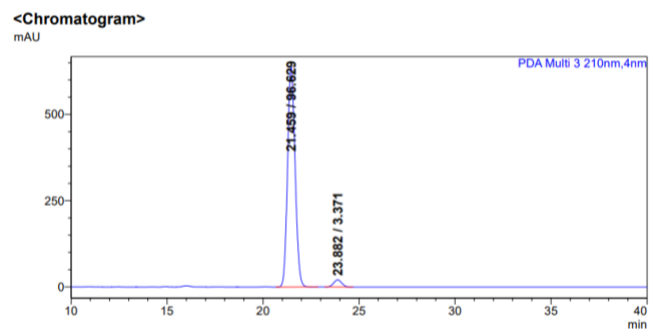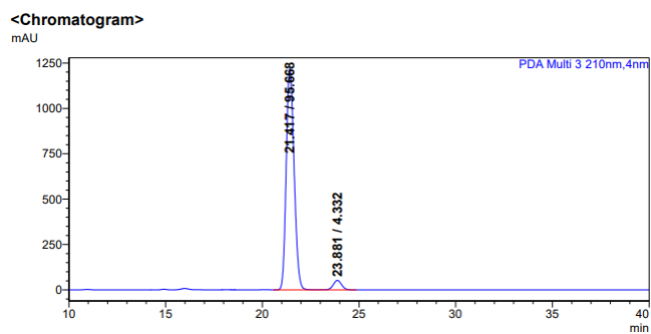

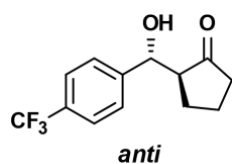

**HPLC conditions:** IC 10% IPA in Hexane. 1 ml/min. 210 nm.

### HPLC traces for racemic

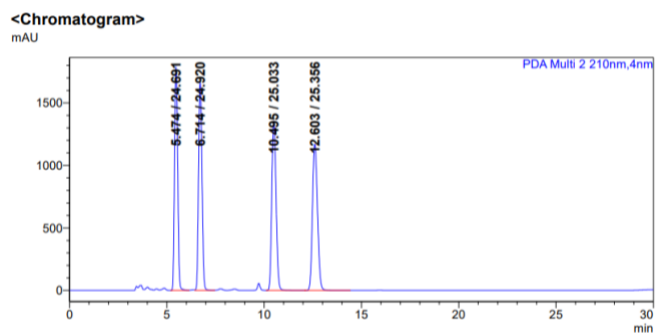

### HPLC traces for chiral (reaction and duplicate)

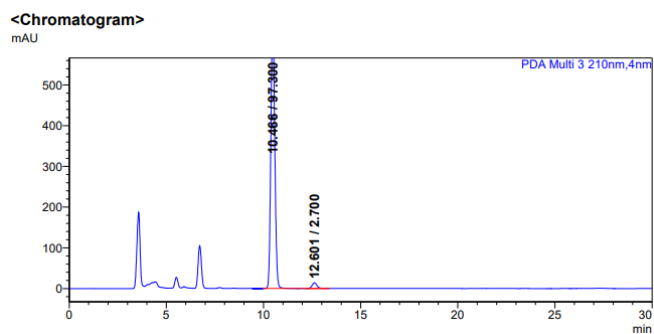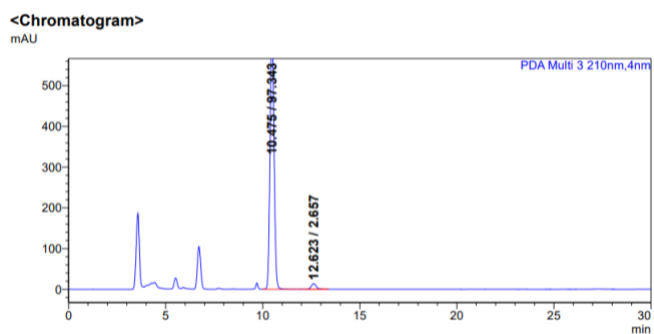

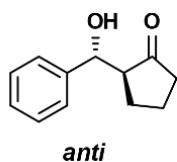

**HPLC conditions:** IC 10% IPA in Hexane. 1 ml/min. 210 nm.

### HPLC traces for racemic

#### <Chromatogram>

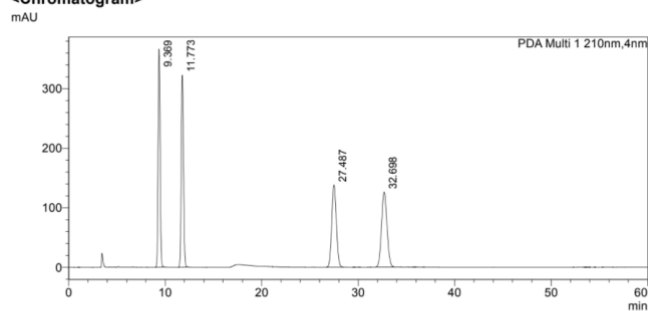

#### <Peak Table>

| Peak# | Ret. Time | Area     | Height | Conc. | Unit | Mark | Name |
|-------|-----------|----------|--------|-------|------|------|------|
| 1     | 9.369     | 5398449  | 366490 | 0.000 |      |      |      |
| 2     | 11.773    | 5182903  | 322761 | 0.000 |      |      |      |
| 3     | 27.487    | 4584706  | 138085 | 0.000 |      |      |      |
| 4     | 32.698    | 4980465  | 125961 | 0.000 |      |      |      |
| Total |           | 20146523 | 953298 |       |      |      |      |

### HPLC traces for chiral (reaction and duplicate)

#### <Chromatogram>

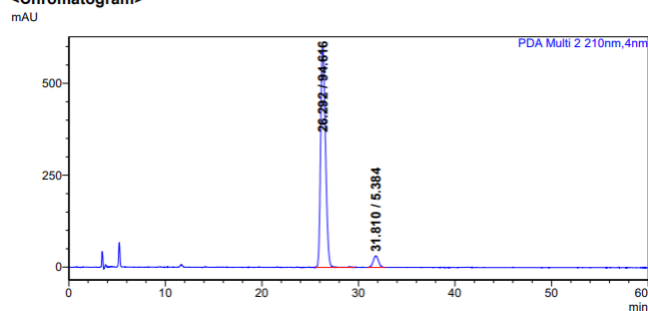

#### <Chromatogram>

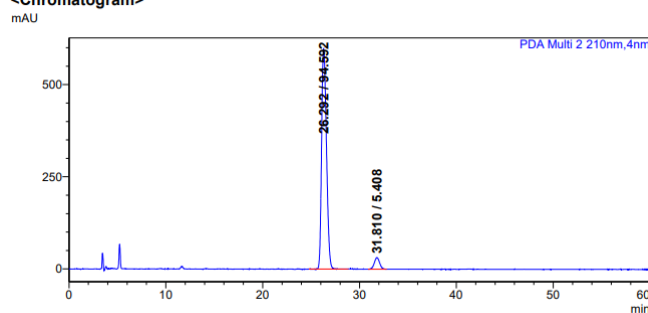

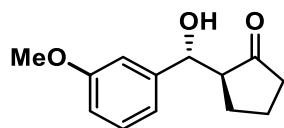

**HPLC conditions:** IC 10% IPA in Hexane. 1 ml/min. 210 nm.

### HPLC traces for racemic

#### <Chromatogram>

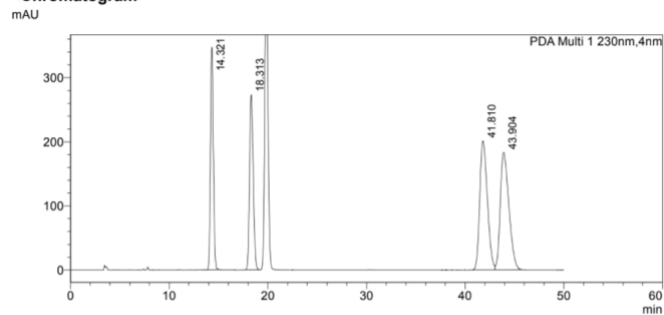

#### <Peak Table>

PDA Ch1 230nm

| Peak# | Ret. Time | Area     | Height  | Conc. | Unit | Mark | Name |
|-------|-----------|----------|---------|-------|------|------|------|
| 1     | 14.321    | 7073360  | 347276  | 0.000 |      |      |      |
| 2     | 18.313    | 7065614  | 272871  | 0.000 |      |      |      |
| 3     | 41.810    | 10789824 | 201105  | 0.000 |      |      |      |
| 4     | 43.904    | 11112362 | 183022  | 0.000 |      | V    |      |
| Total |           | 36041160 | 1004274 |       |      |      |      |

### HPLC traces for chiral (reaction and duplicate)

#### <Chromatogram>

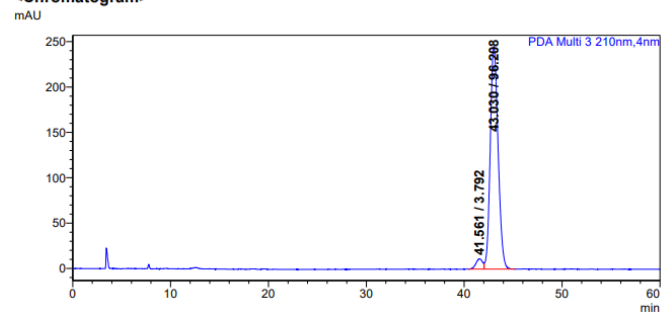

#### <Chromatogram>

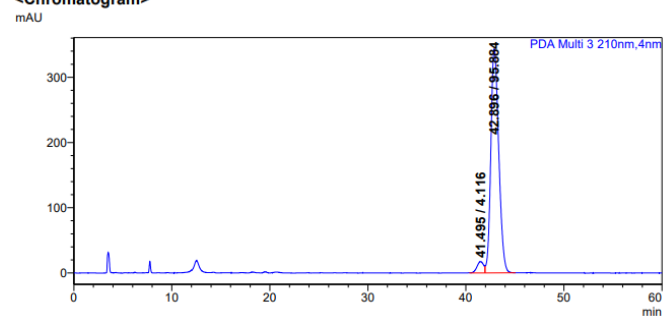



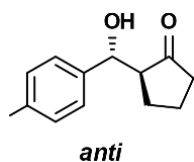

**HPLC conditions:** IC 10% IPA in Hexane. 1 ml/min. 210 nm.

### HPLC traces for racemic

#### <Chromatogram>

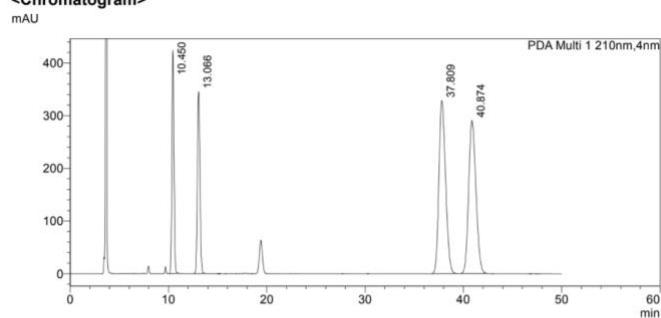

#### <Peak Table>

| Peak# | Ret. Time | Area     | Height  | Conc. | Unit | Mark | Name    |
|-------|-----------|----------|---------|-------|------|------|---------|
| 1     | 10.450    | 6185642  | 422194  | 2.091 | mg/L |      | Binol R |
| 2     | 13.066    | 6193100  | 345079  | 0.000 |      |      |         |
| 3     | 37.809    | 15457760 | 328018  | 0.000 |      |      |         |
| 4     | 40.874    | 14936524 | 290364  | 0.000 |      |      |         |
| Total |           | 42773026 | 1385655 |       |      |      |         |

### HPLC traces for chiral (reaction and duplicate)

#### <Chromatogram>

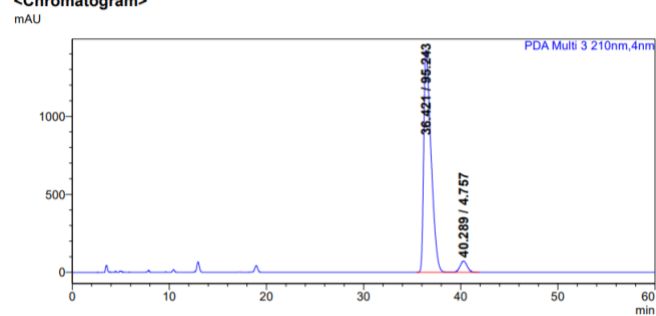

#### <Chromatogram>

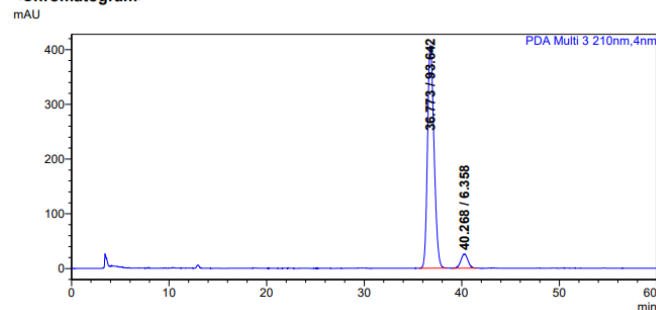

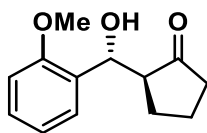

**HPLC conditions:** IB 5% IPA in Hexane. 1 ml/min. 210 nm.

### HPLC traces for racemic

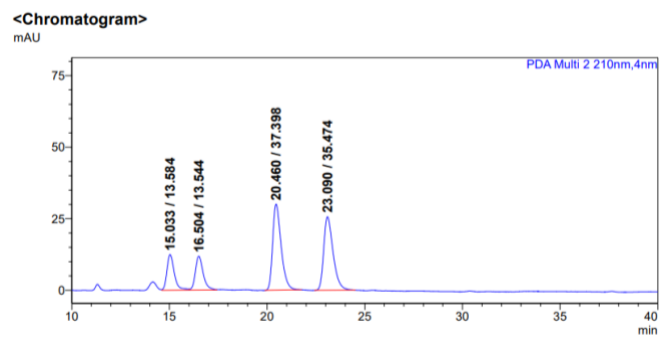

### HPLC traces for chiral (reaction and duplicate)

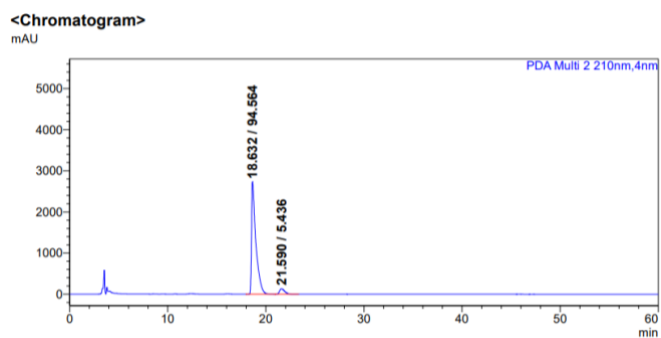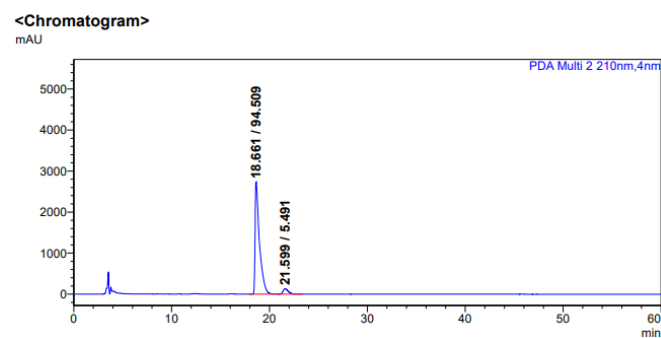

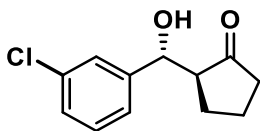

**HPLC conditions:** IC 10% IPA in Hexane. 1 ml/min. 210 nm.

### HPLC traces for racemic

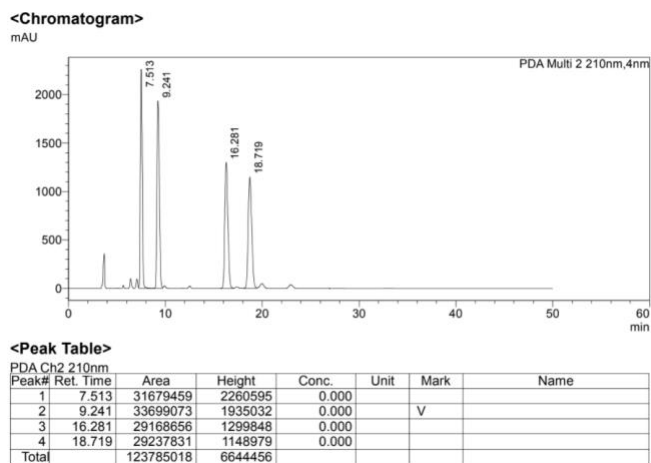

### HPLC traces for chiral (reaction and duplicate)

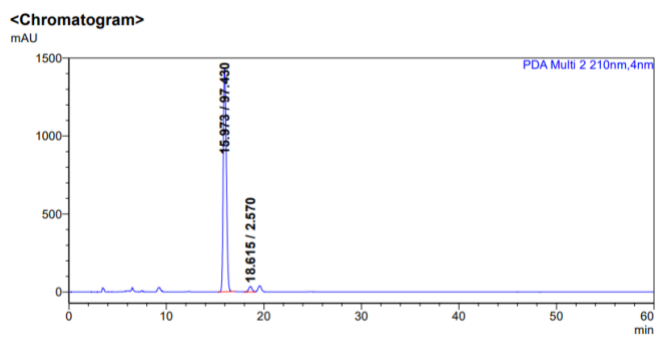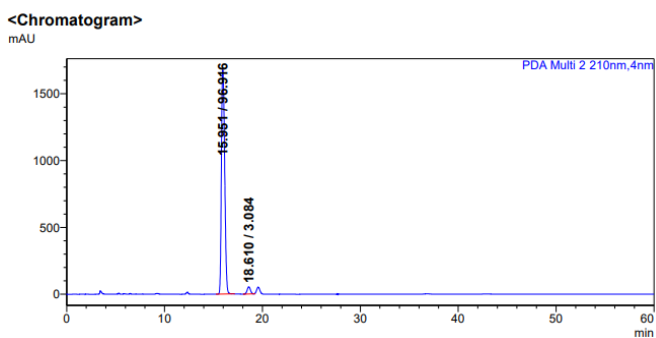

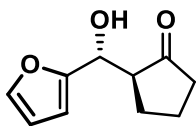

**HPLC conditions:** IC 10% IPA in Hexane. 1 ml/min. 210 nm.

### HPLC traces for racemic

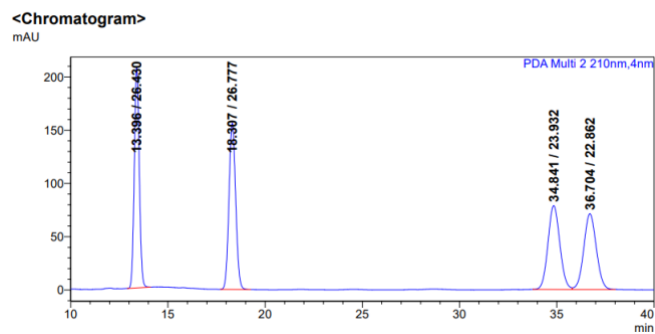

### HPLC traces for chiral (reaction and duplicate)

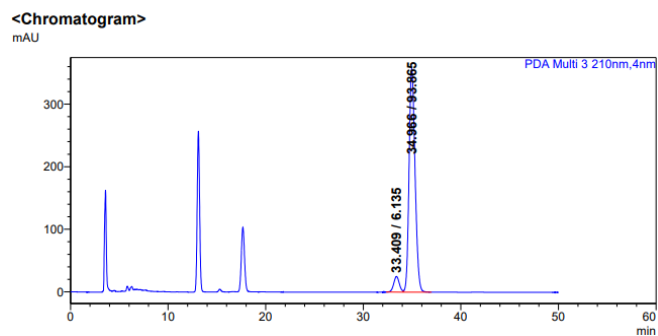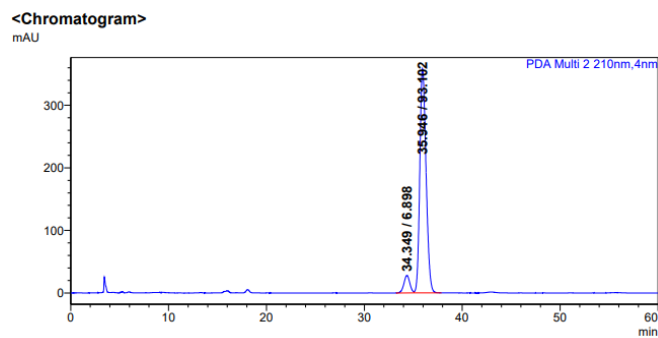

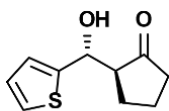

*anti*

**HPLC conditions:** IB 5% IPA in Hexane. 1 ml/min. 226 nm.

## HPLC traces for racemic

<Chromatogram>

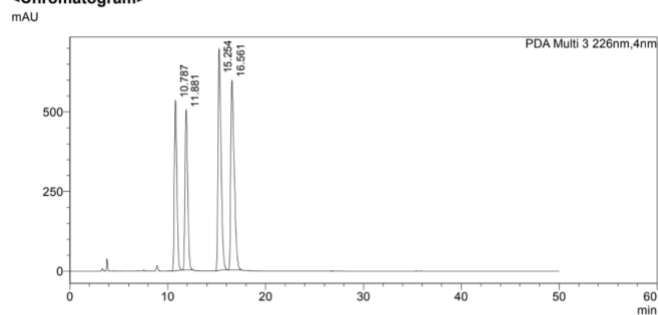

<Peak Table>

| Peak# | Ret. Time | Area     | Height  | Conc. | Unit | Mark | Name |
|-------|-----------|----------|---------|-------|------|------|------|
| 1     | 10.787    | 9593148  | 534647  | 0.000 |      | M    |      |
| 2     | 11.881    | 9591144  | 502868  | 0.000 |      | M    |      |
| 3     | 15.254    | 14942671 | 694912  | 0.000 |      | M    |      |
| 4     | 16.561    | 14827314 | 597010  | 0.000 |      | M    |      |
| Total |           | 48954278 | 2329437 |       |      |      |      |

## HPLC traces for chiral (reaction and duplicate)

<Chromatogram>

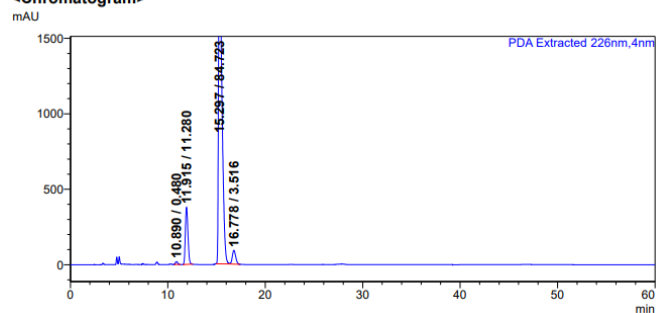

<Chromatogram>

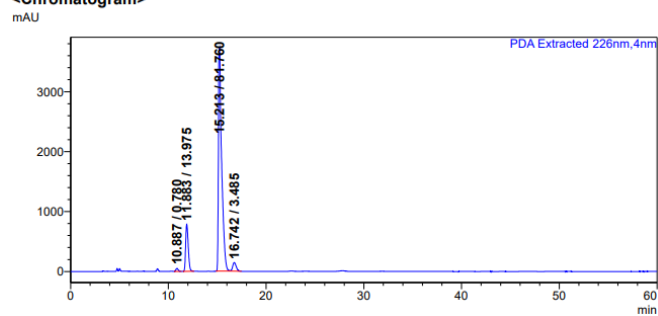

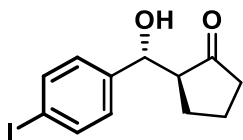

**HPLC conditions:** IC 10% IPA in Hexane. 1 ml/min. 226 nm.

## HPLC traces for racemic

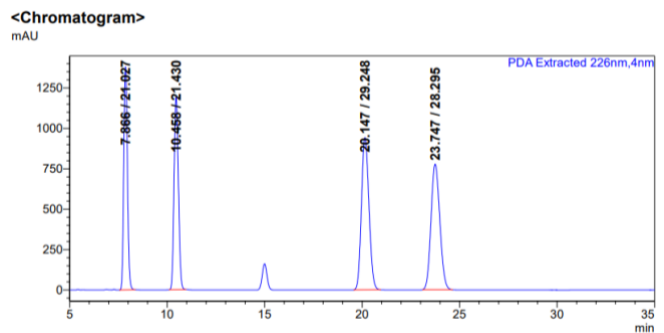

## HPLC traces for chiral (reaction and duplicate)

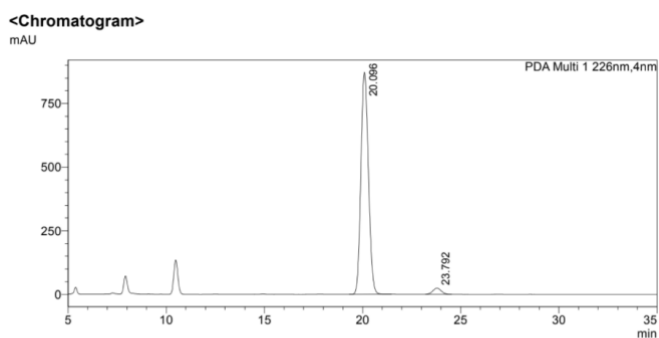

### <Peak Table>

| Peak# | Ret. Time | Area     | Height | Conc. | Unit | Mark | Name |
|-------|-----------|----------|--------|-------|------|------|------|
| 1     | 20.096    | 23249260 | 871743 | 0.000 |      | M    |      |
| 2     | 23.792    | 728320   | 24160  | 0.000 |      |      |      |
| Total |           | 23977580 | 895903 |       |      |      |      |

### <Chromatogram>

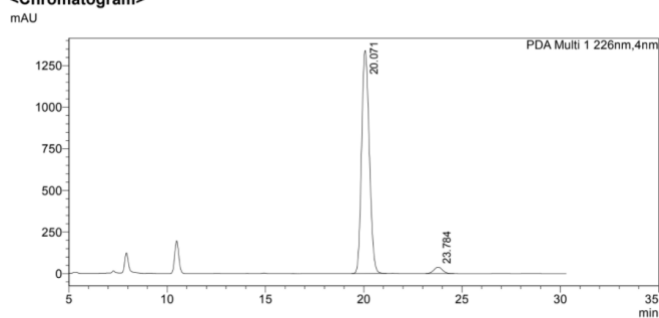

### <Peak Table>

| Peak# | Ret. Time | Area     | Height  | Conc. | Unit | Mark | Name |
|-------|-----------|----------|---------|-------|------|------|------|
| 1     | 20.071    | 36647735 | 1340107 | 0.000 |      |      |      |
| 2     | 23.784    | 1168767  | 38533   | 0.000 |      |      |      |
| Total |           | 37816502 | 1378640 |       |      |      |      |

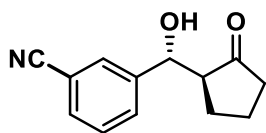

**HPLC conditions:** IB 10% IPA in Hexane. 1 ml/min. 226 nm.

### HPLC traces for racemic

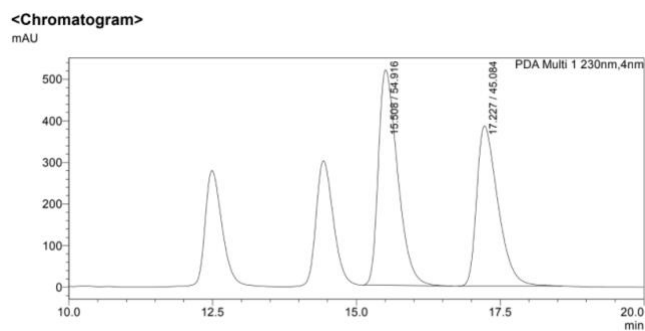

### HPLC traces for chiral (reaction and duplicate)

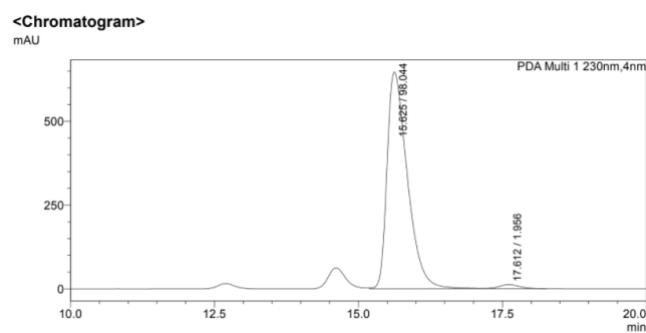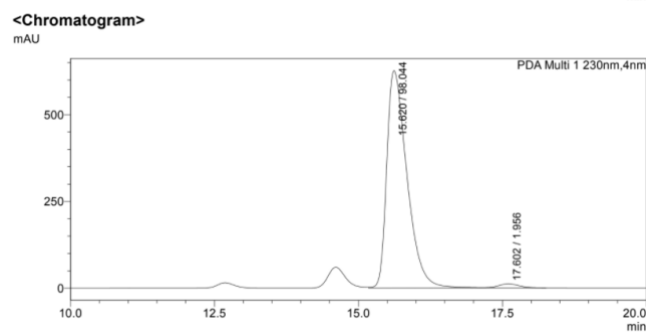

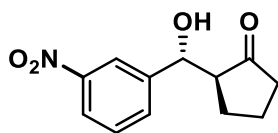

**HPLC conditions:** IB 10% IPA in Hexane. 1 ml/min. 226 nm.

### HPLC traces for racemic

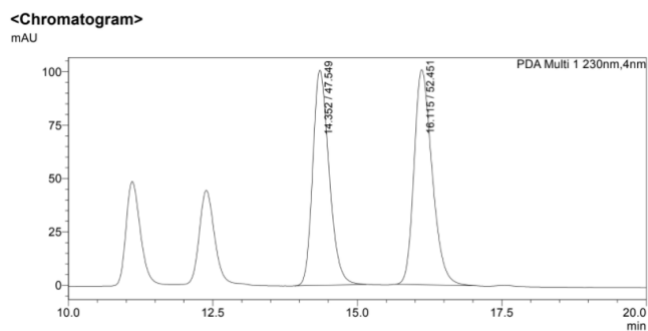

### HPLC traces for chiral (reaction and duplicate)

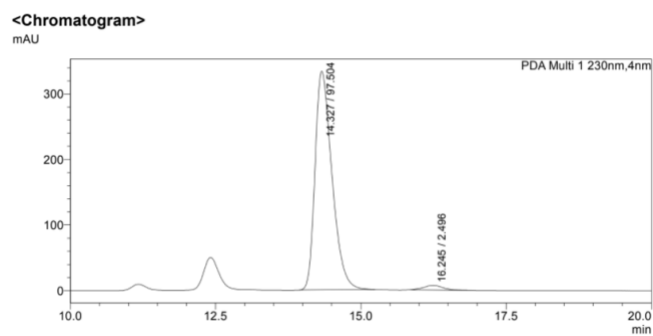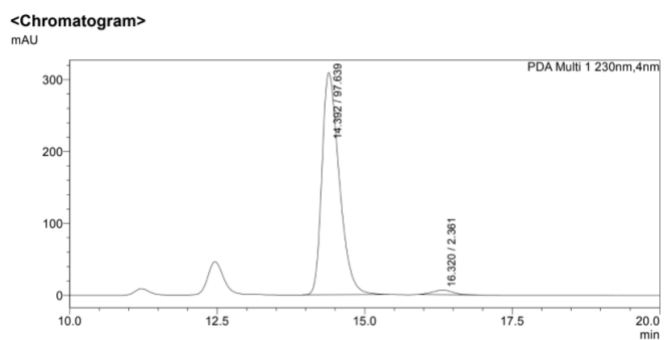



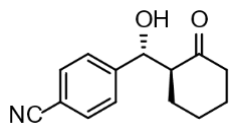

**HPLC conditions:** IC 10% IPA in Hexane. 1 ml/min. 226 nm.

### HPLC traces for racemic

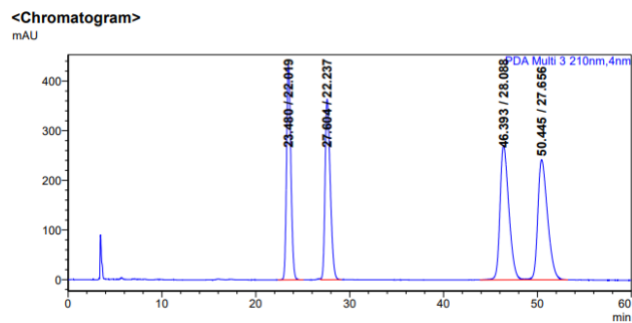

### HPLC traces for chiral (reaction and duplicate)

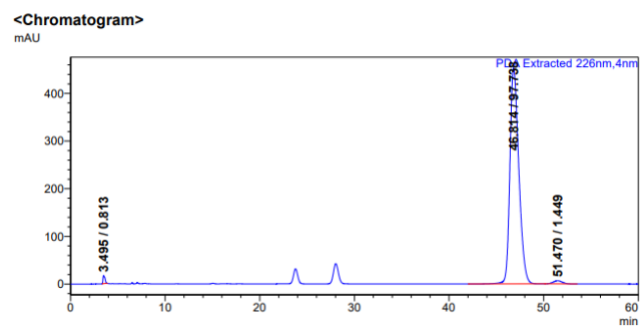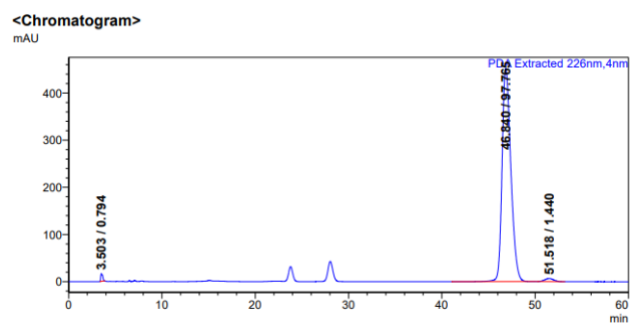

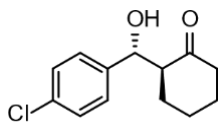

**HPLC conditions:** IC 10% IPA in Hexane. 1 ml/min. 226 nm.

### HPLC traces for racemic

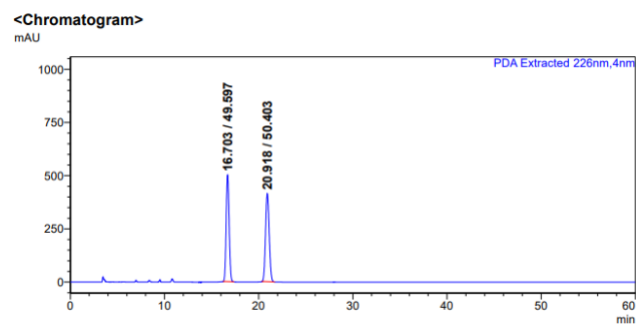

### HPLC traces for chiral (reaction and duplicate)

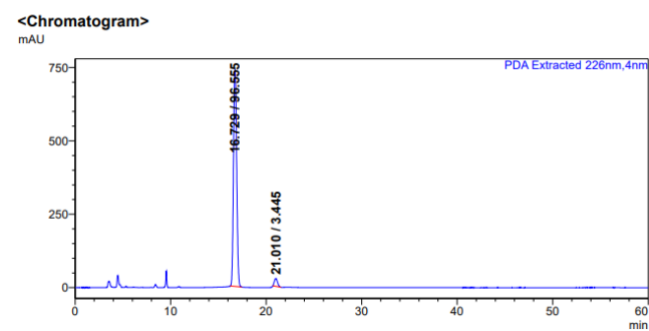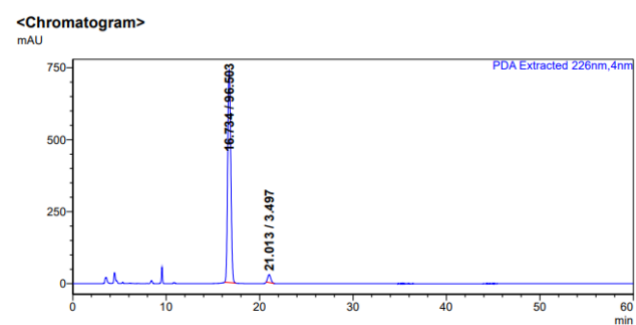

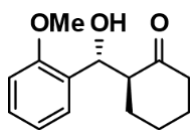

**HPLC conditions:** AS-H 9% IPA in Hexane. 1 ml/min. 226 nm.

### HPLC traces for racemic

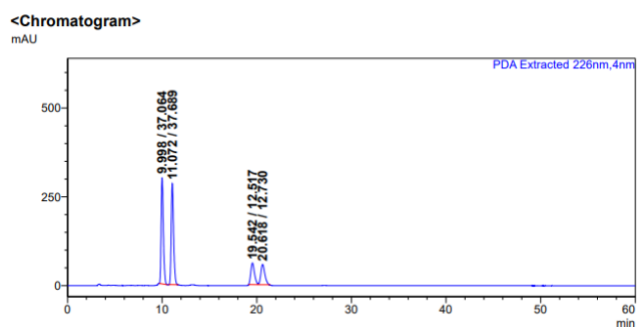

### HPLC traces for chiral (reaction and duplicate)

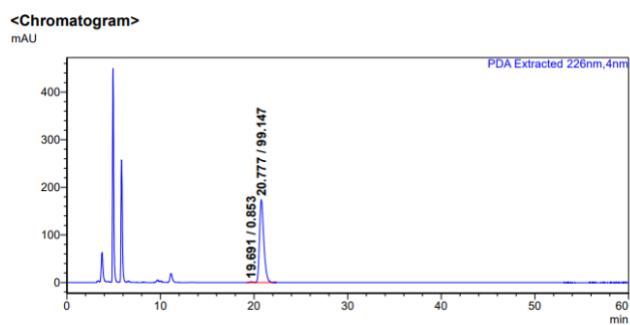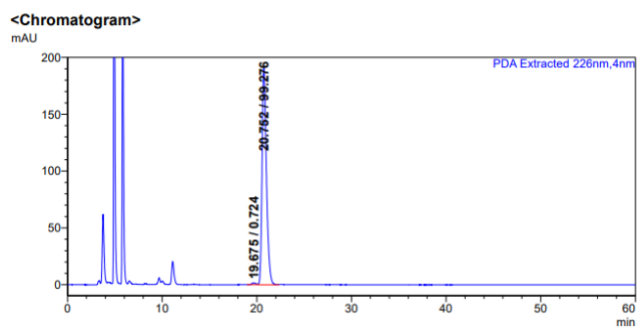



**HPLC conditions:** AS-H 9% IPA in Hexane. 1 ml/min. 254 nm.

### HPLC traces for racemic

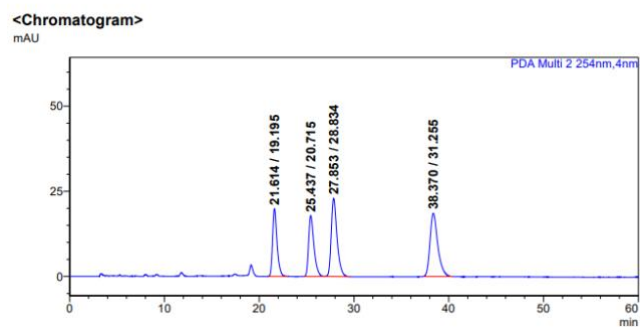

### HPLC traces for chiral (reaction and duplicate)

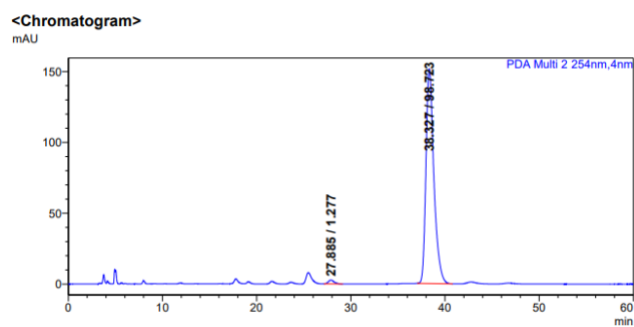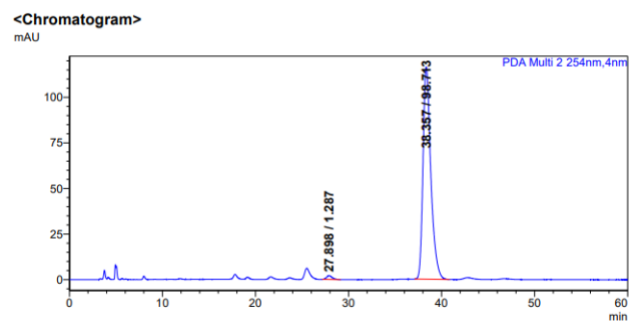

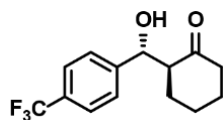

**HPLC conditions:** IA 9% IPA in Hexane. 1 ml/min. 226 nm.

### HPLC traces for racemic

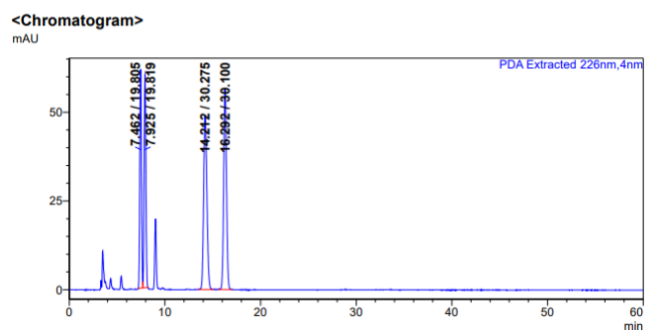

### HPLC traces for chiral (reaction and duplicate)

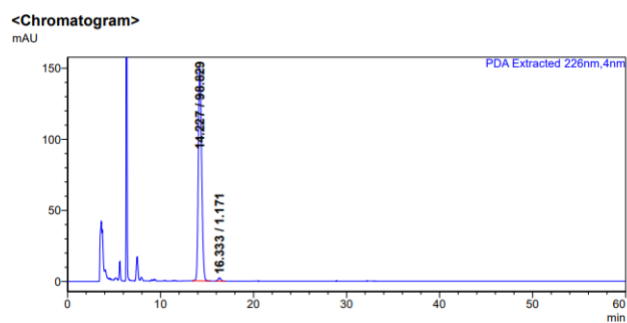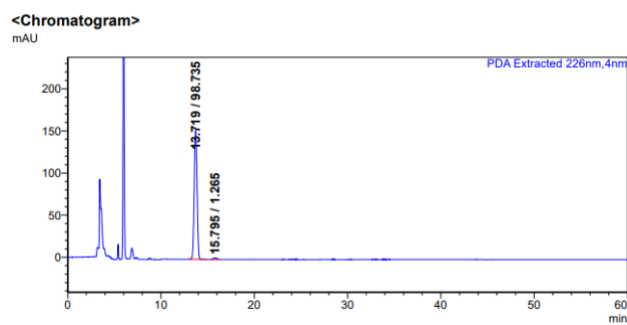

## 16. Chiral HPLC of optimization and control experiments

### 16.1 Solvent screening (table S2)

With hexane as a solvent:

<Chromatogram>

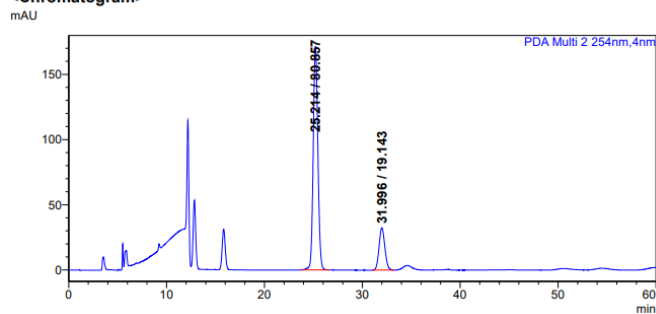

<Chromatogram>

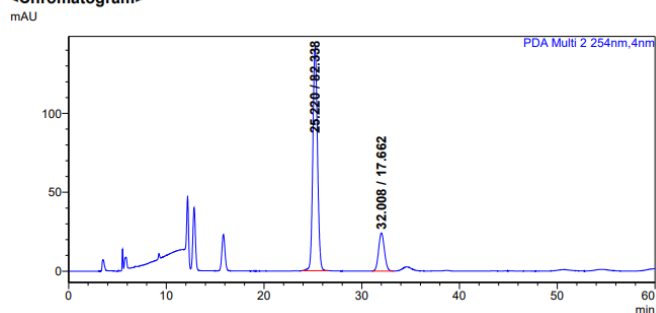

With CH<sub>3</sub>CN as a solvent:

<Chromatogram>

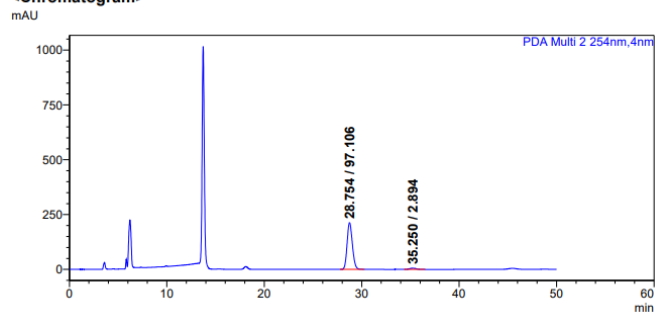

<Chromatogram>

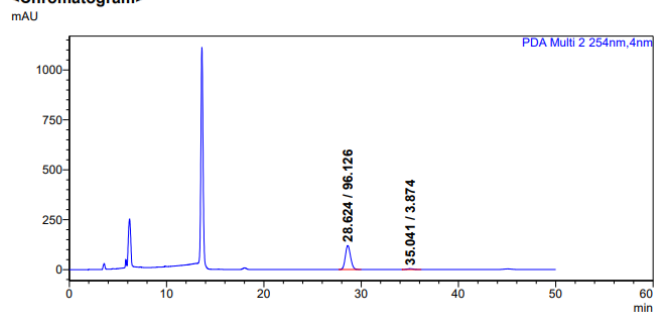

With  $\text{CHCl}_3$  as a solvent:

<Chromatogram>

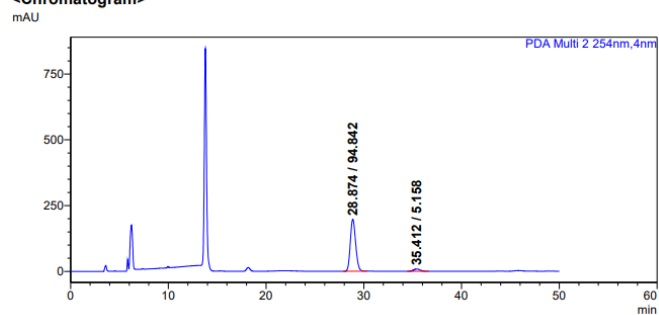

<Chromatogram>

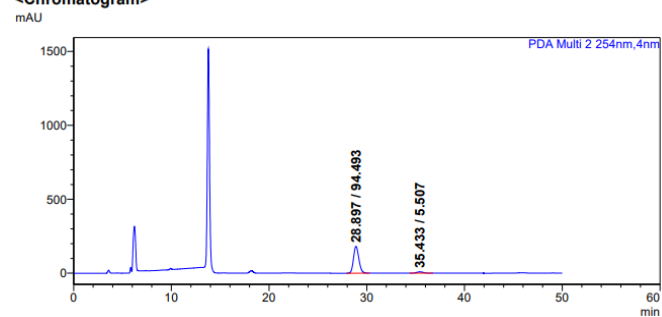

With MeOH as a solvent:

<Chromatogram>

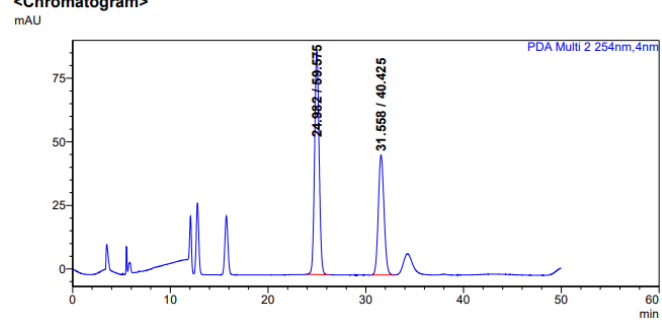

<Chromatogram>

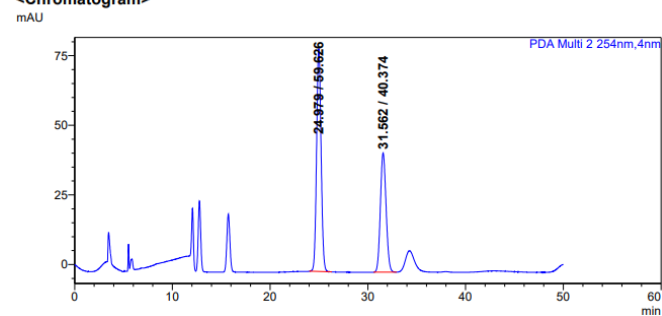

## 16.2 Time optimization (table S3)

### 0.5 hour with boronic acid

<Chromatogram>

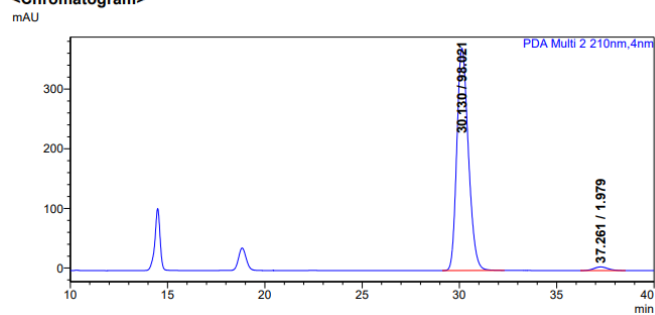

<Chromatogram>

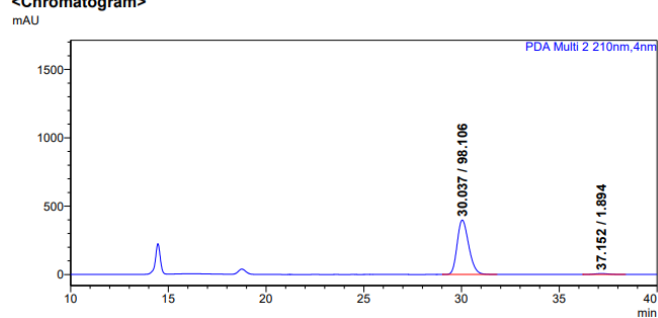

### 1 hour with boronic acid

<Chromatogram>

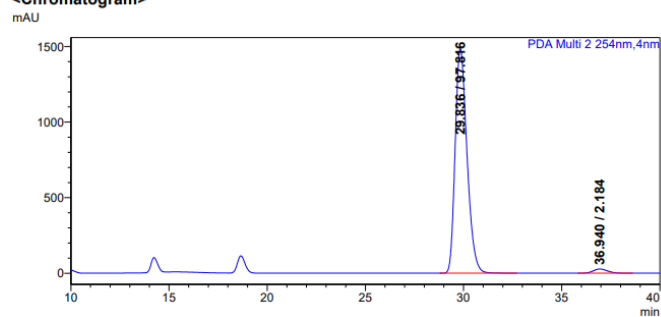

<Chromatogram>

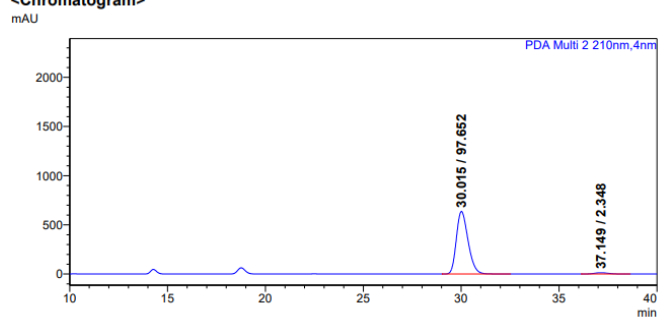



1 hour without boronic acid

<Chromatogram>

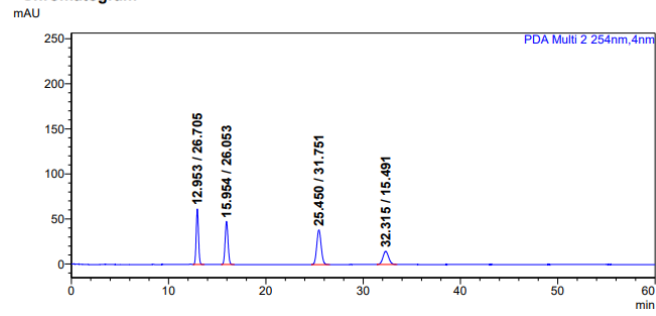

<Chromatogram>

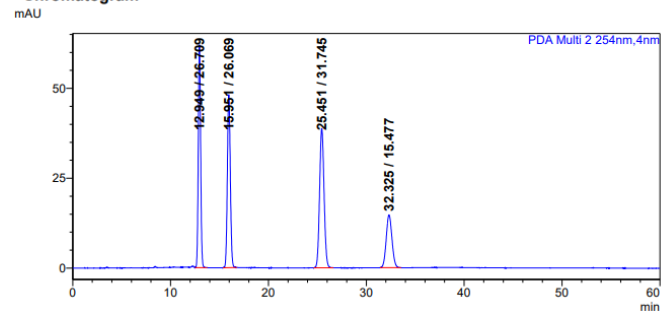

2 hours with boronic acid

<Chromatogram>

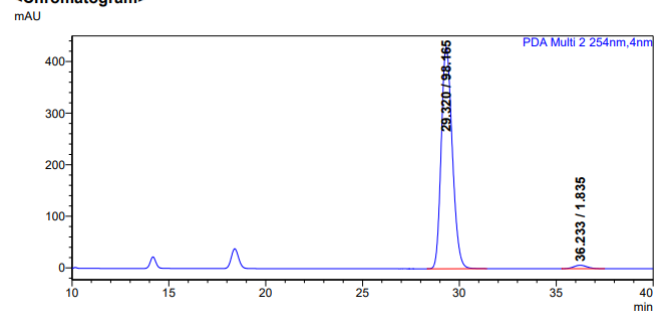

<Chromatogram>

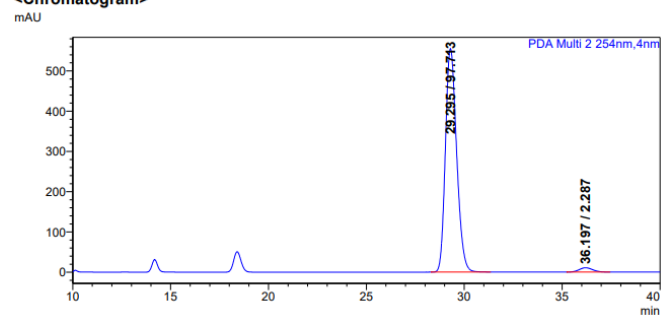

4 hours with boronic acid

<Chromatogram>

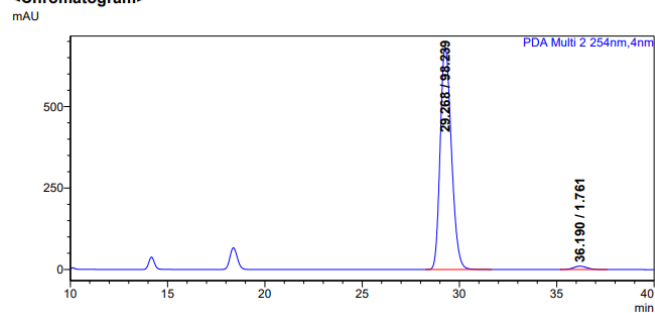

<Chromatogram>

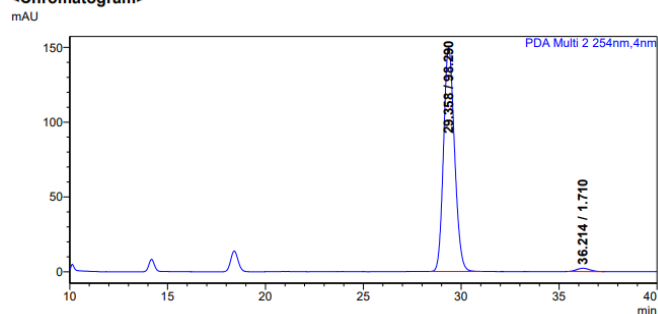

20 hours with boronic acid

<Chromatogram>

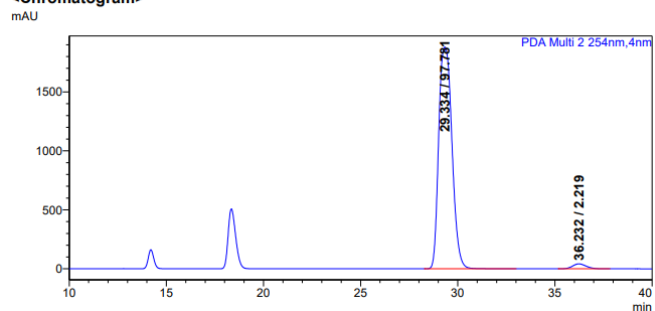

<Chromatogram>

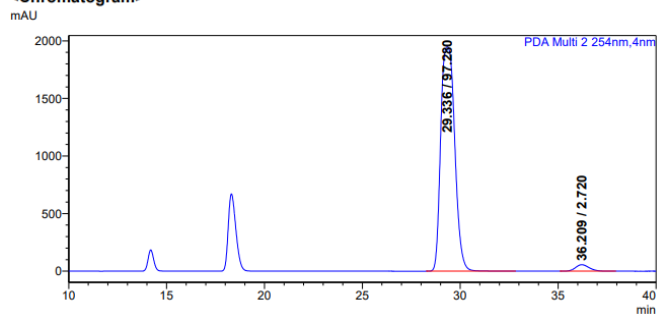

20 hours without boronic acid

<Chromatogram>

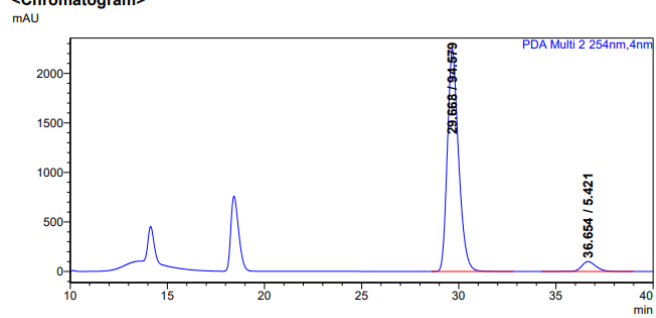

<Chromatogram>

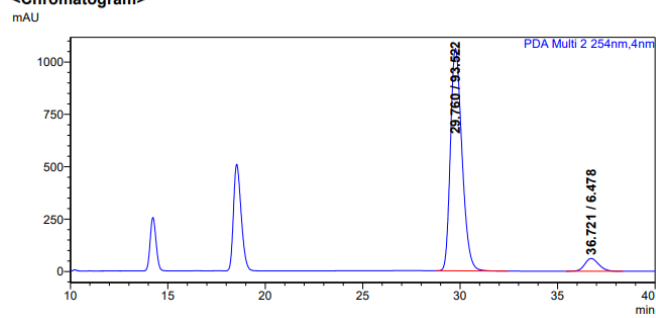

## 16.3 Water optimization (table S4)

0 mol% H<sub>2</sub>O

<Chromatogram>

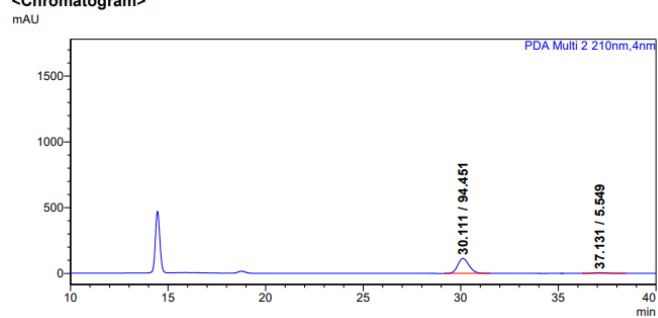

<Chromatogram>

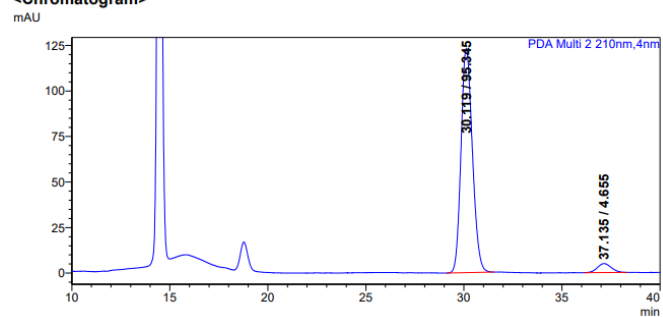

50 mol%

<Chromatogram>

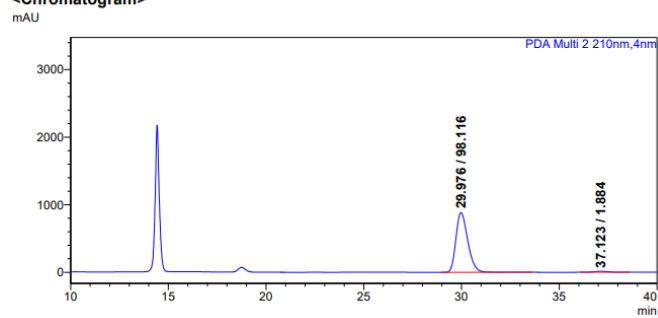

<Chromatogram>

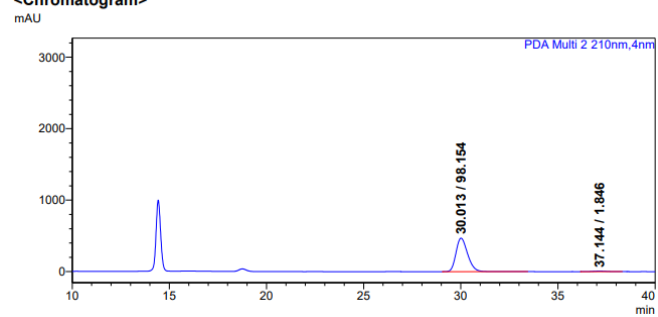

100 mol%

<Chromatogram>  
mAU

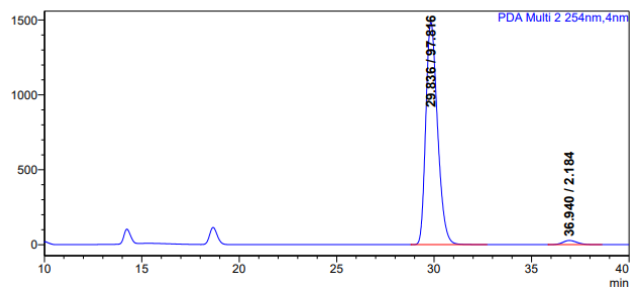

<Chromatogram>  
mAU

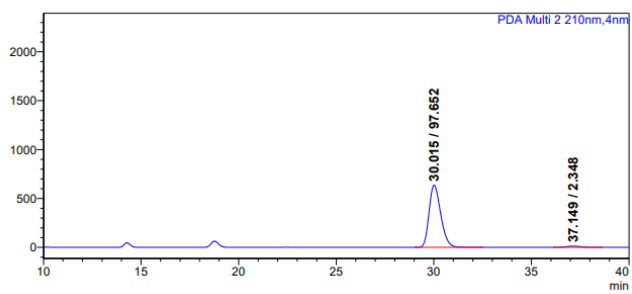

200 mol%

<Chromatogram>  
mAU

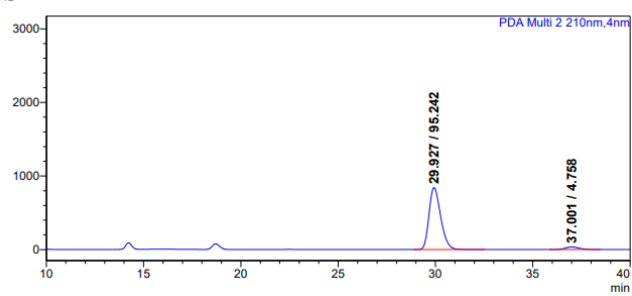

<Chromatogram>  
mAU

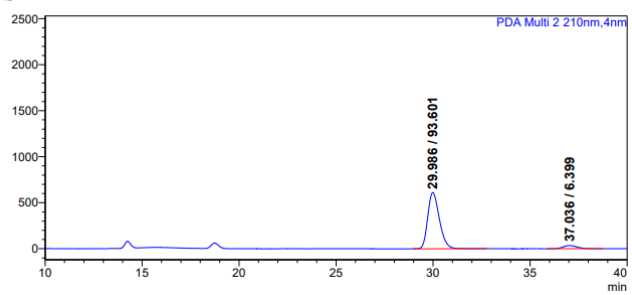

## 16.4 Water screening without molecular sieves (table S1)

22 mol%

<Chromatogram>

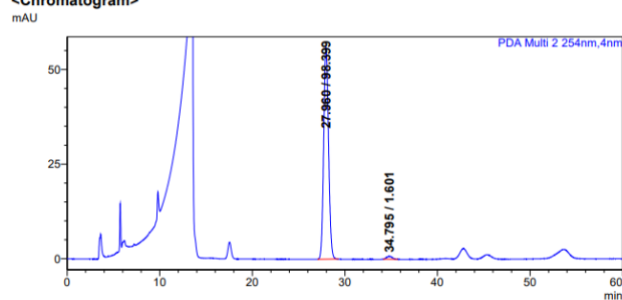

<Chromatogram>

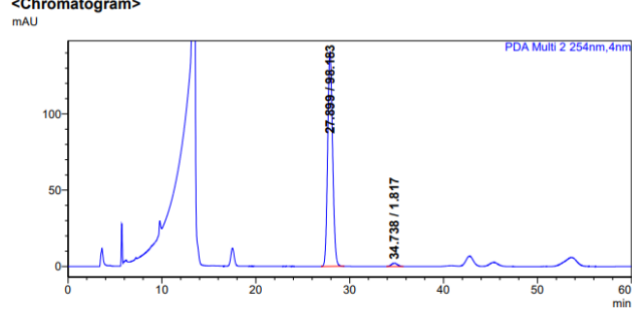

55 mol%

<Chromatogram>

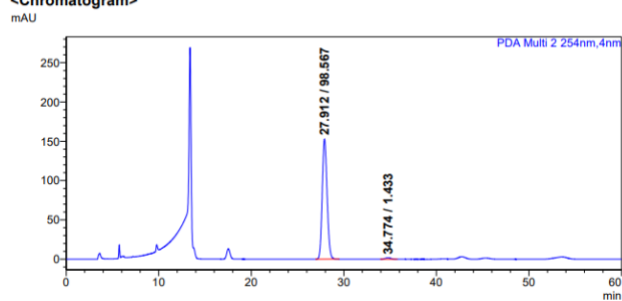

<Chromatogram>

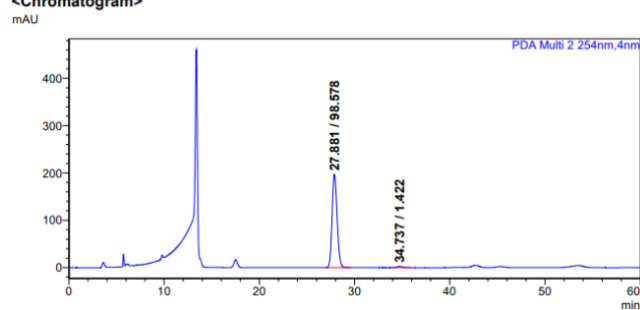

77 mol%

<Chromatogram>

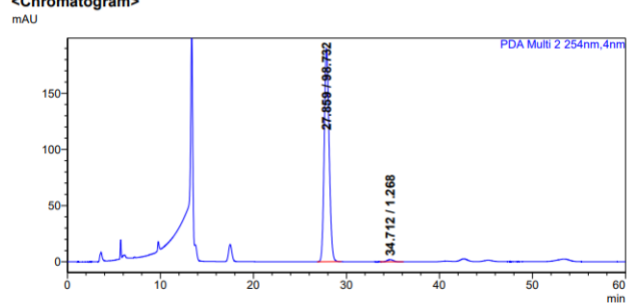

<Chromatogram>

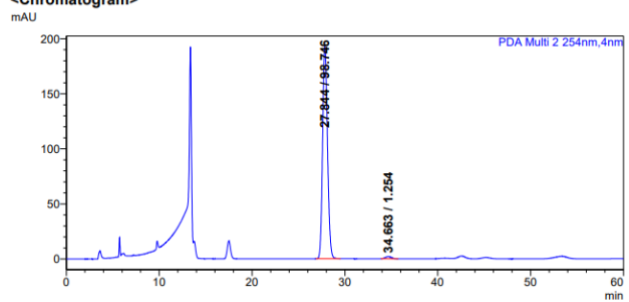

16.5 additional molecular sieves sizes (table S1)

4 angstrom molecular sieves

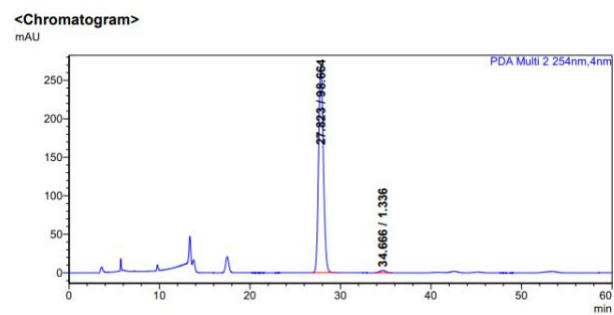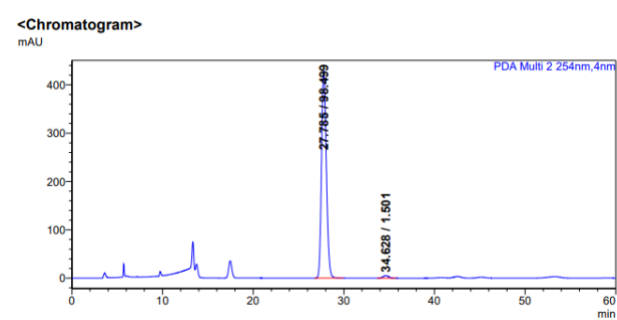

5 angstrom molecular sieves

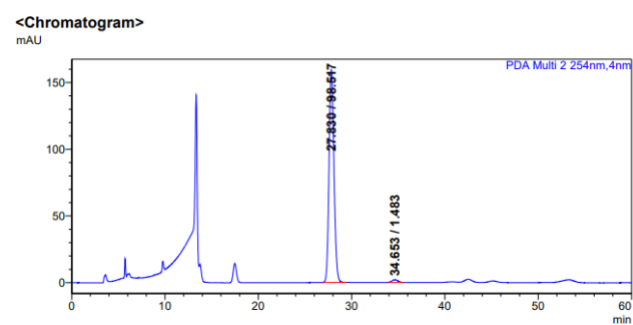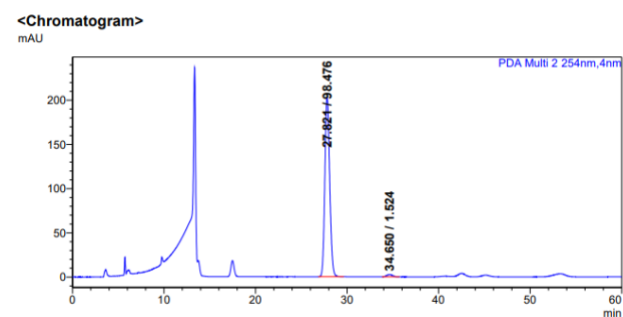



## 16.6 additional control experiments (table S1)

No molecular sieves, 100 mol% H<sub>2</sub>O, 100 mol% KCl<sub>(S)</sub>

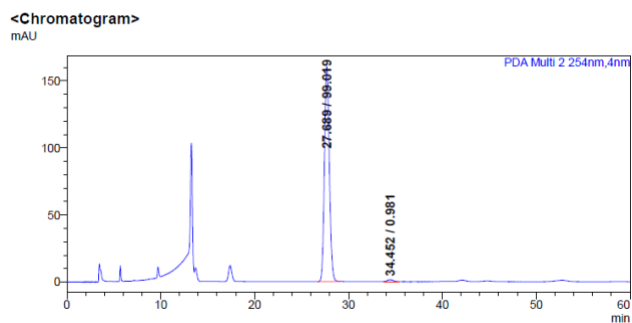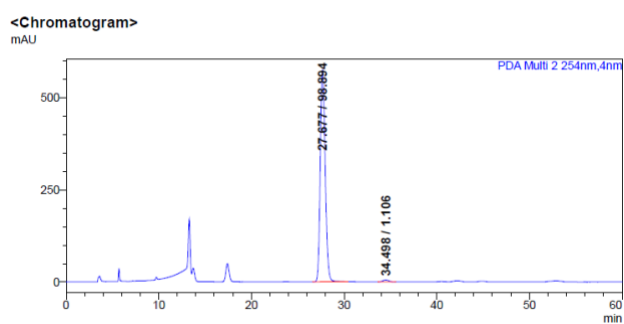

No molecular sieves, 100 mol% H<sub>2</sub>O, 10 mol% 2,6-lutidine

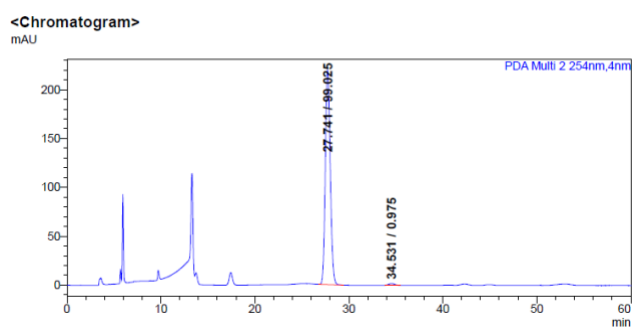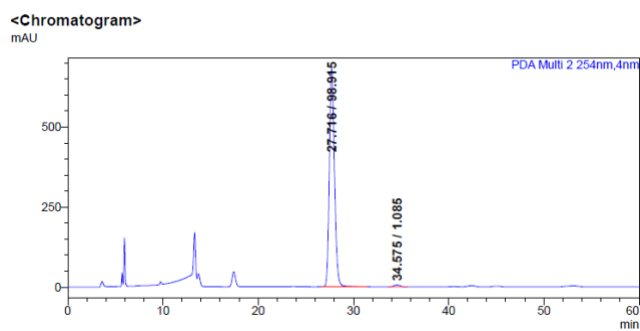

No molecular sieves, 100 mol% H<sub>2</sub>O, 10 mol% KHCO<sub>3(s)</sub>

<Chromatogram>

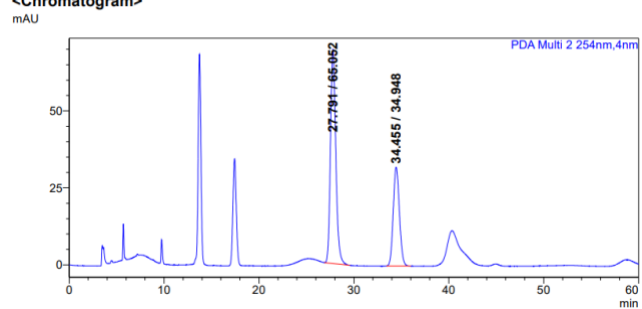

<Chromatogram>

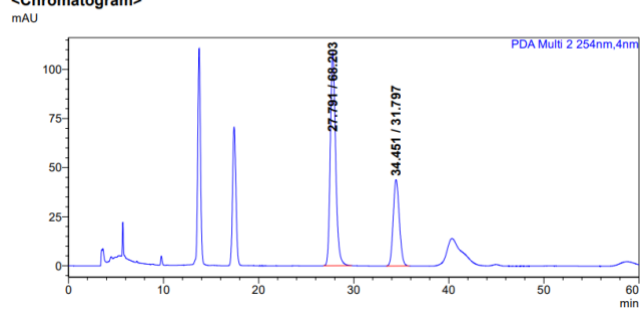

## 16.7 Boronic acid screening (table S5)

### 3-F phenylboronic acid

<Chromatogram>

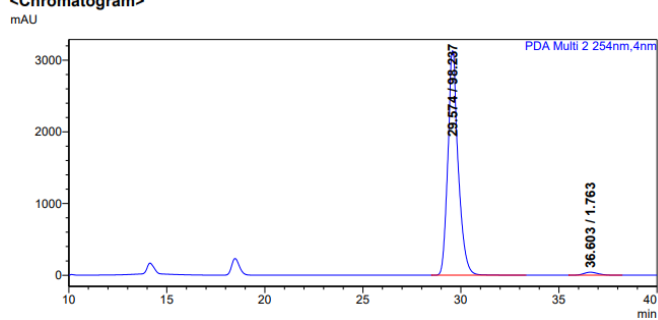

<Chromatogram>

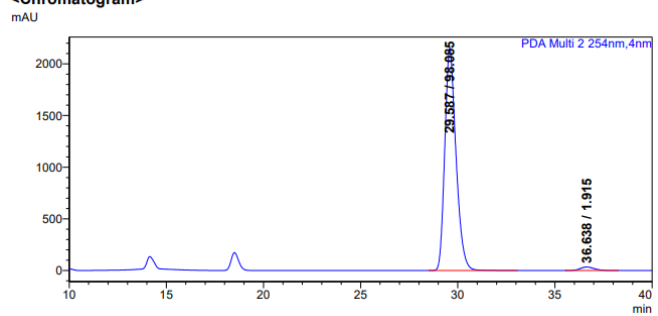

### 4-*t*Bu phenylboronic acid

<Chromatogram>

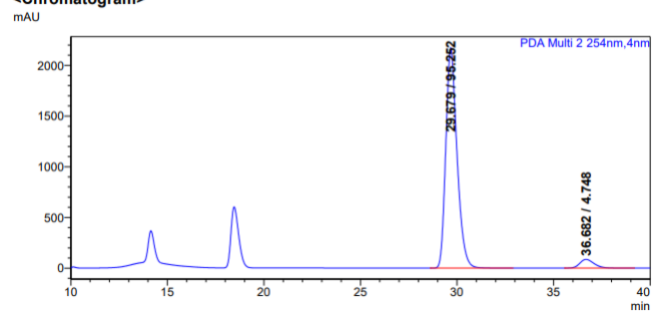

<Chromatogram>

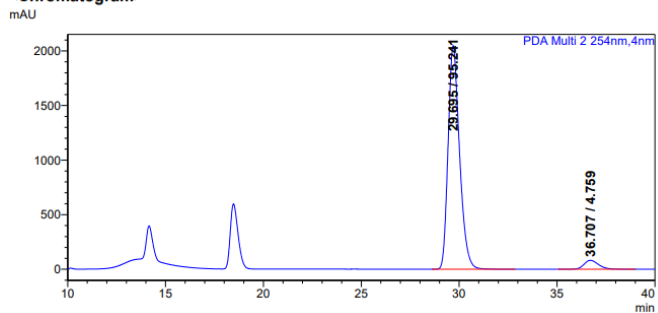

## 2,4-Me phenylboronic acid

### <Chromatogram>

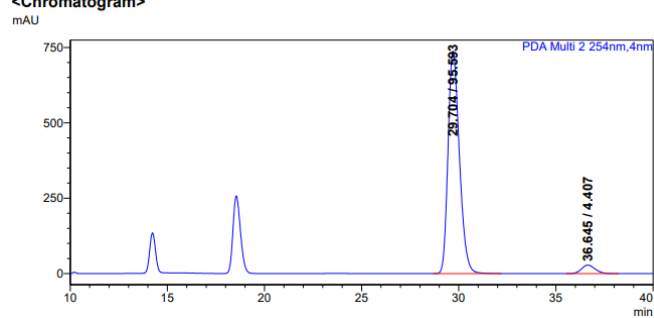

### <Chromatogram>

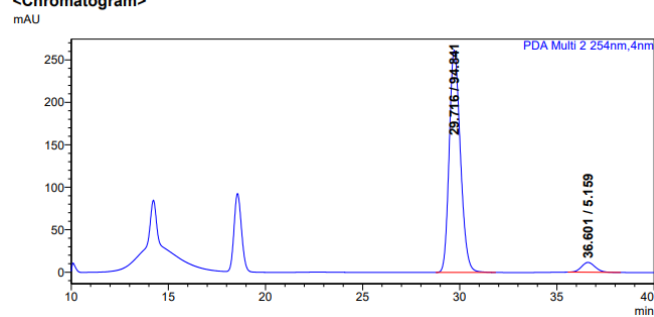

## 3,5-OMe phenylboronic acid

### <Chromatogram>

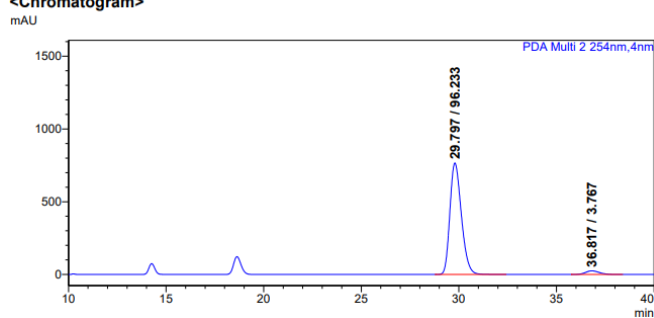

### <Chromatogram>

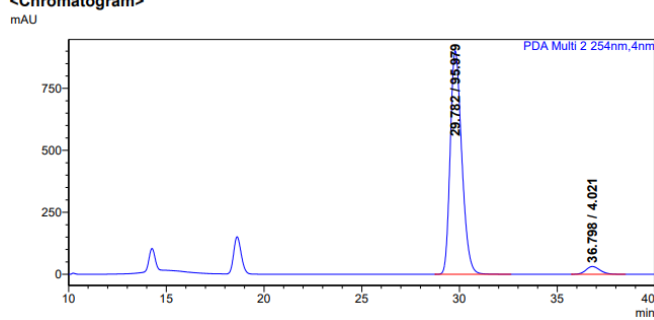

## 4-Me phenylboronic acid

### <Chromatogram>

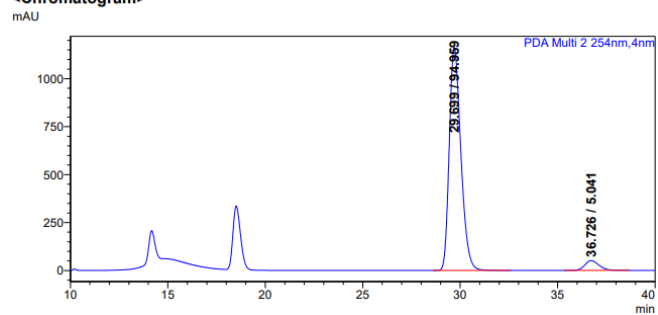

### <Chromatogram>

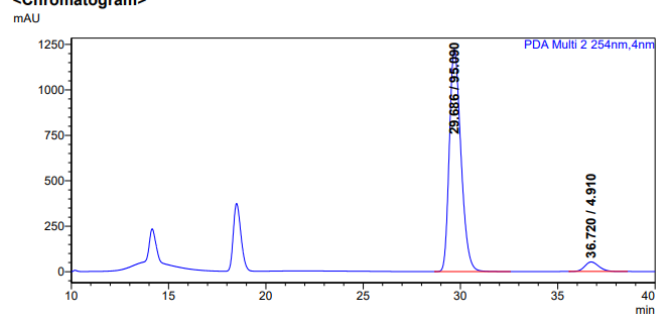

## 3-CF<sub>3</sub> phenylboronic acid

### <Chromatogram>

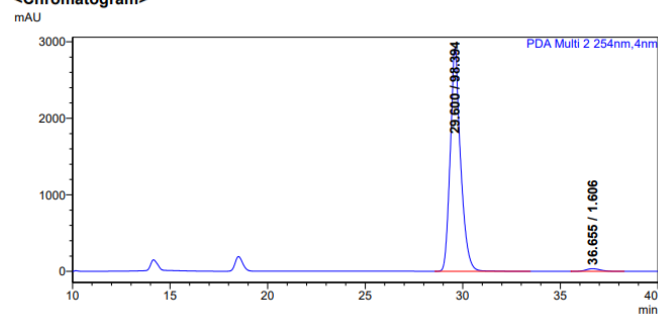

### <Chromatogram>

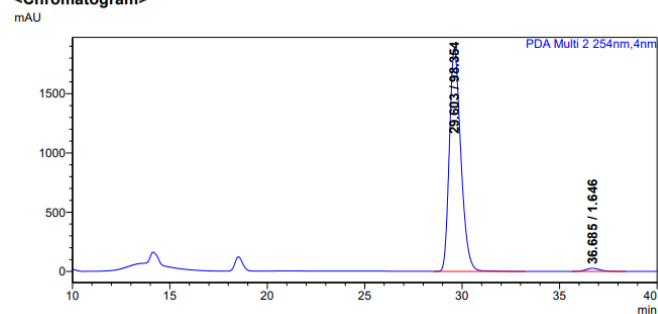

## Naphthalene boronic acid

### <Chromatogram>

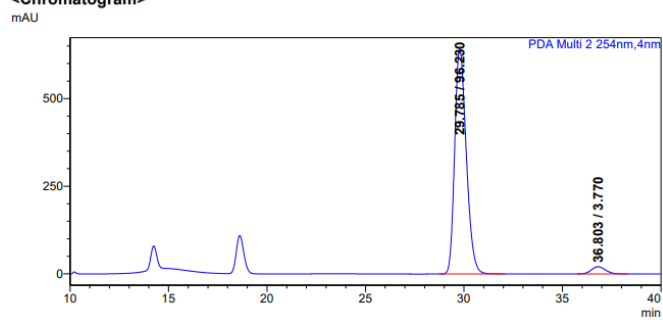

### <Chromatogram>

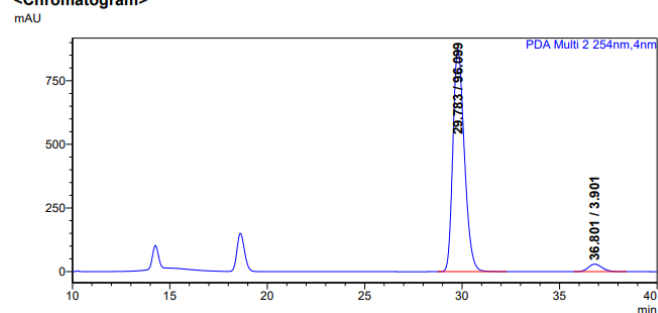

## 4-CF<sub>3</sub> phenylboronic acid

### <Chromatogram>

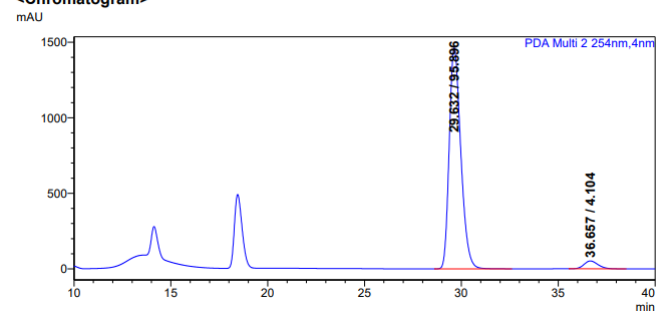

### <Chromatogram>

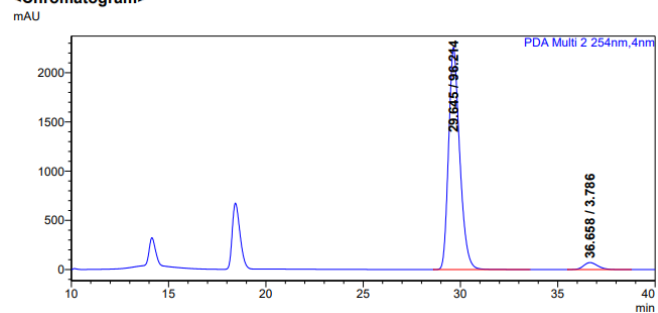

## 4-F phenylboronic acid

### <Chromatogram>

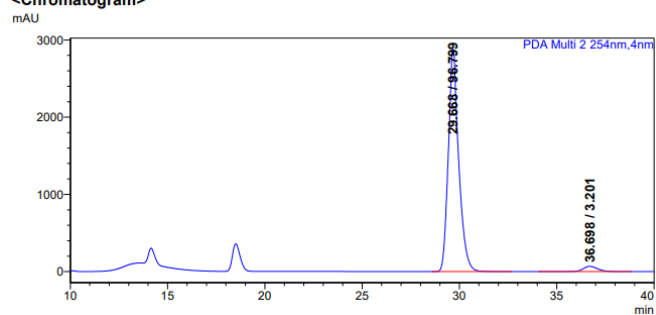

### <Chromatogram>

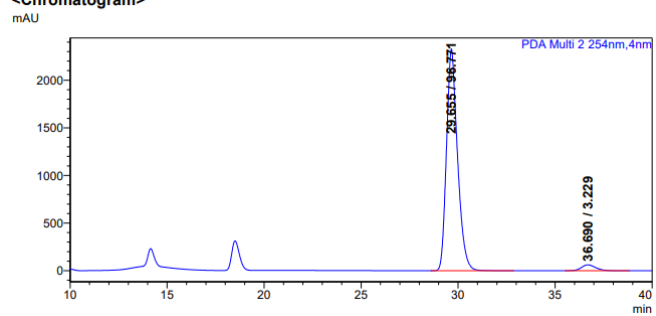

## 4-OMe phenylboronic acid

### <Chromatogram>

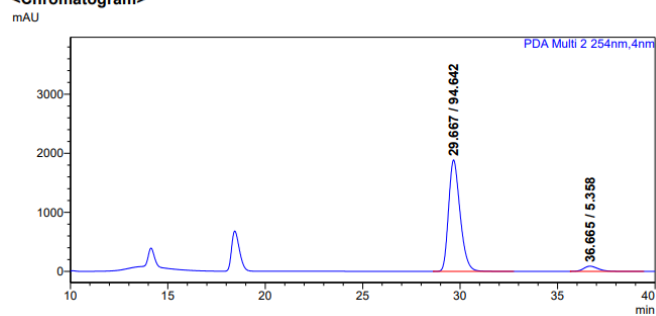

### <Chromatogram>

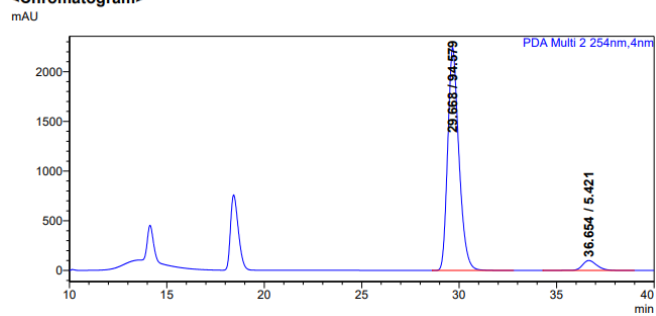

## 3-Me phenylboronic acid

### <Chromatogram>

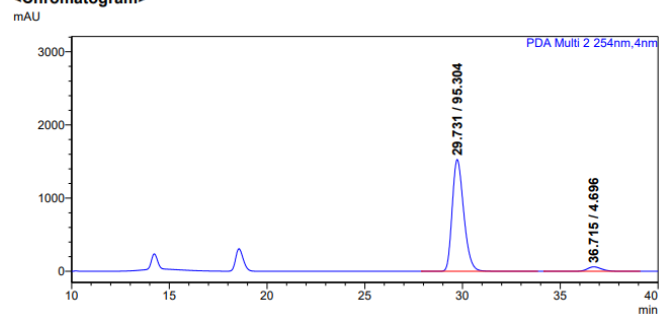

### <Chromatogram>

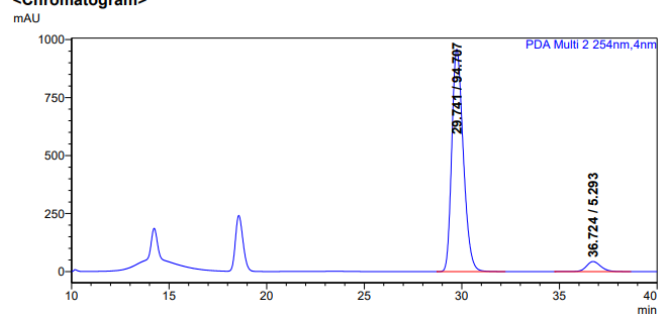

## 2-F phenylboronic acid

### <Chromatogram>

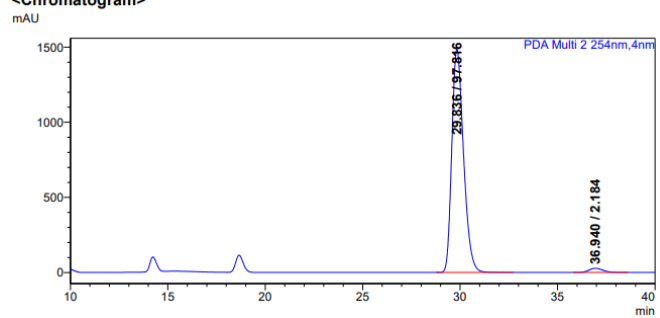

### <Chromatogram>

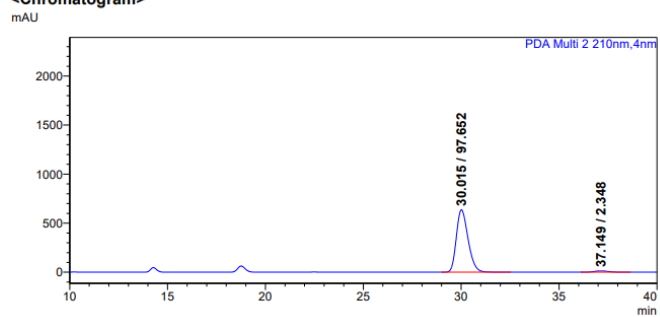



## Phenylboronic acid

### <Chromatogram>

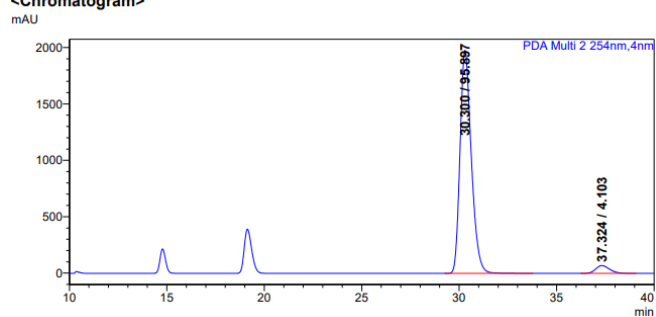

## 3,5-F phenylboronic acid

### <Chromatogram>

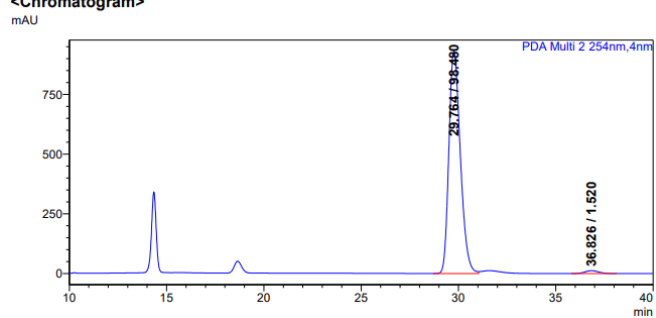

### <Chromatogram>

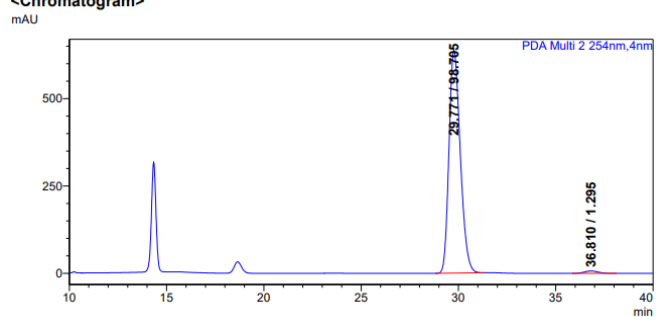

## 2-Me phenylboronic acid

### <Chromatogram>

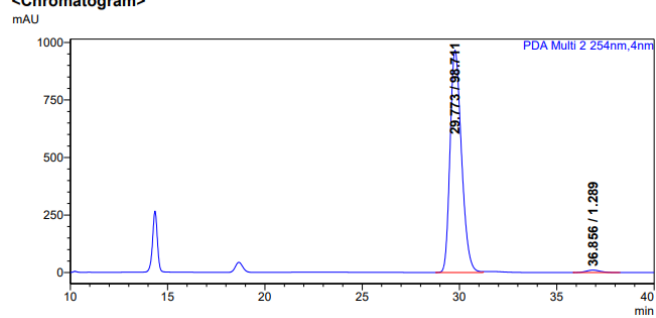

### <Chromatogram>

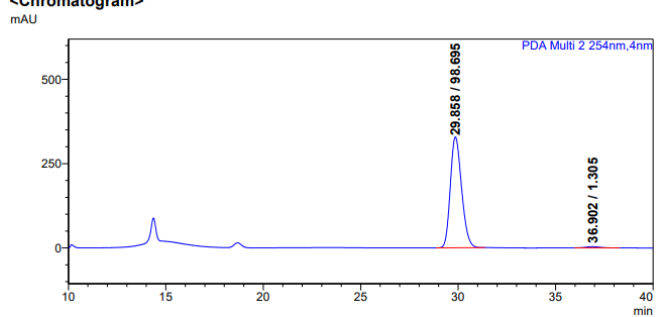

## 16.8 Boronic acid screening using acetone as aldol donor (table S8)

Racemic

<Chromatogram>

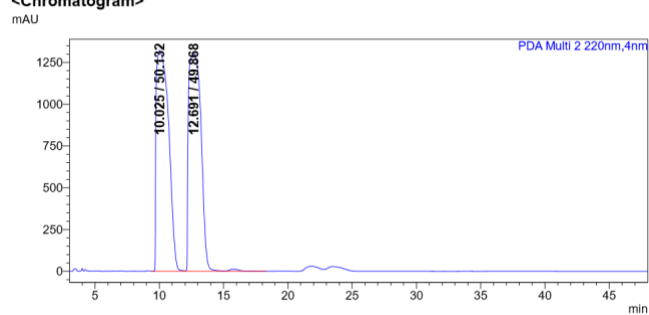

2-Me phenylboronic acid

<Chromatogram>

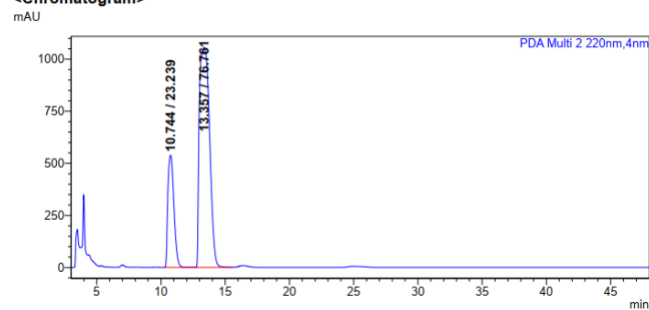

<Chromatogram>

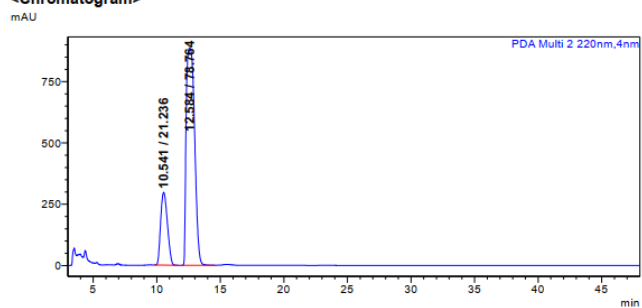

## 2-F phenylboronic acid

### <Chromatogram>

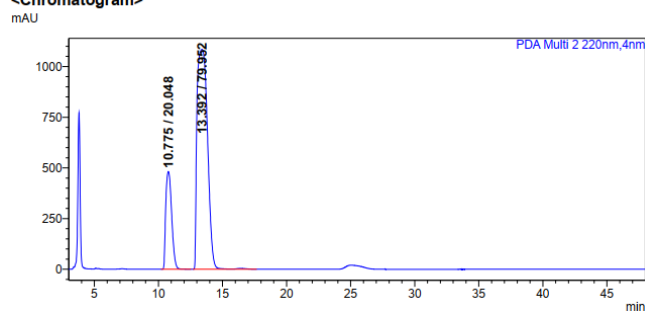

### <Chromatogram>

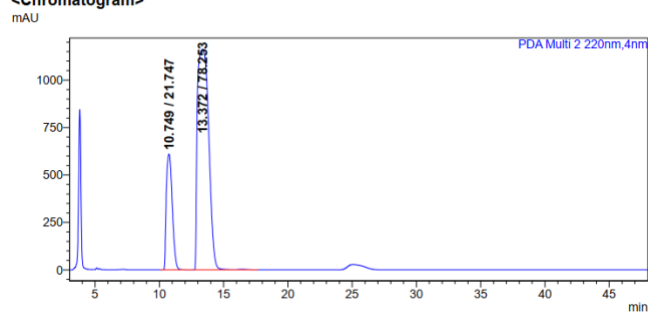

## 3-Me phenylboronic acid

### <Chromatogram>

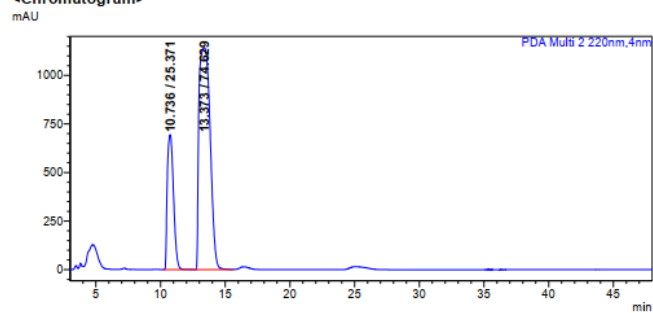

### <Chromatogram>

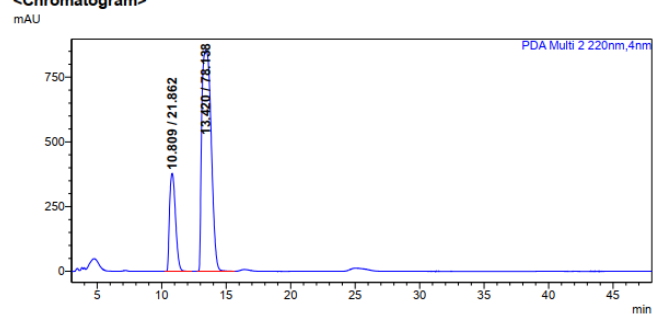

### 3-F phenylboronic acid

<Chromatogram>

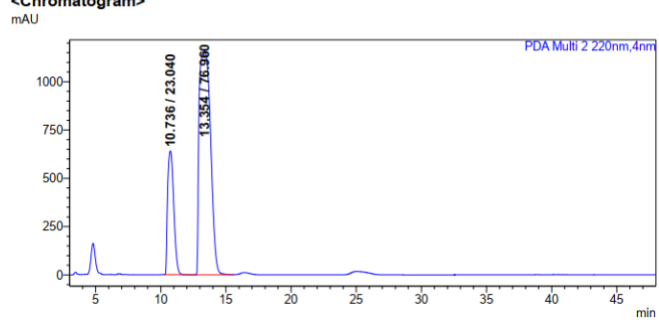

<Chromatogram>

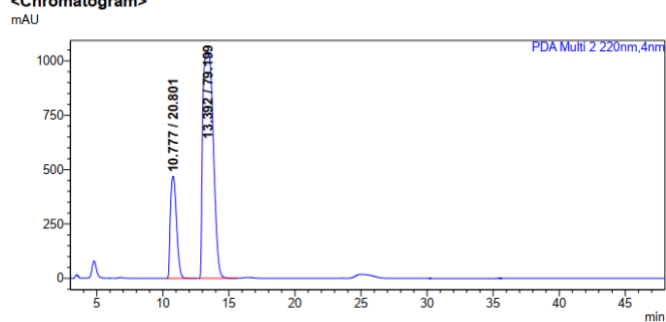

### 4-Me phenylboronic acid

<Chromatogram>

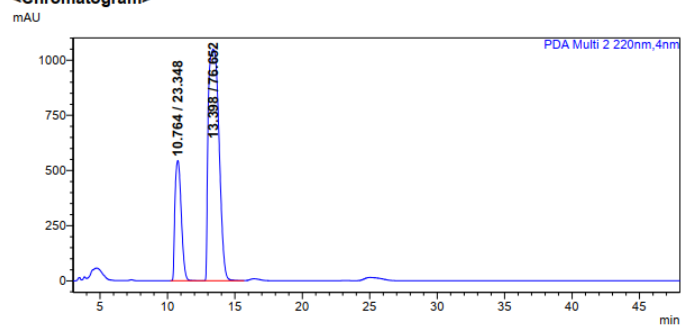

<Chromatogram>

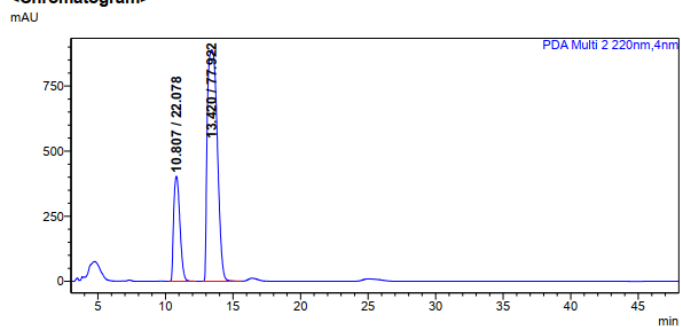

# 4-CF<sub>3</sub> phenylboronic acid

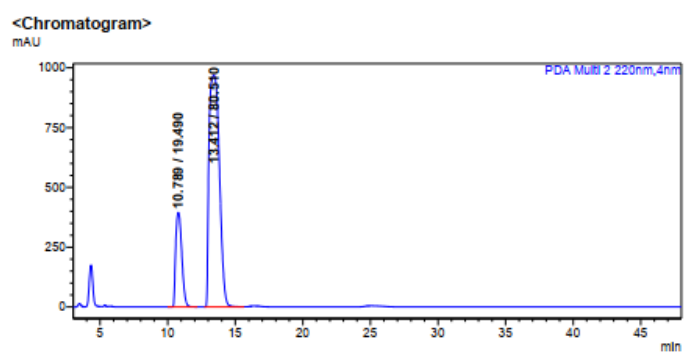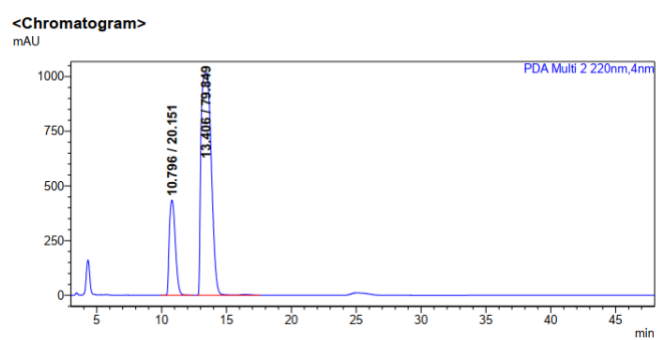

## 16.9 Boronic acid / proline ratio screening using acetone as aldol donor (table S9)

1:1

<Chromatogram>

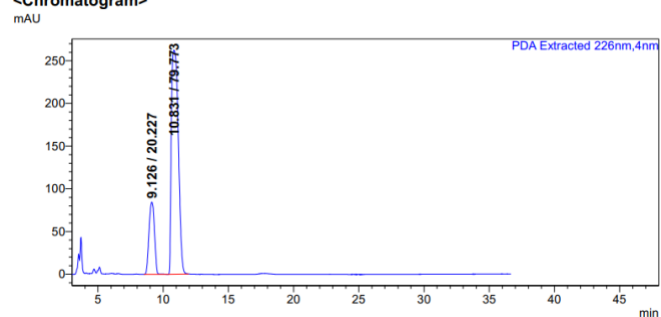

<Chromatogram>

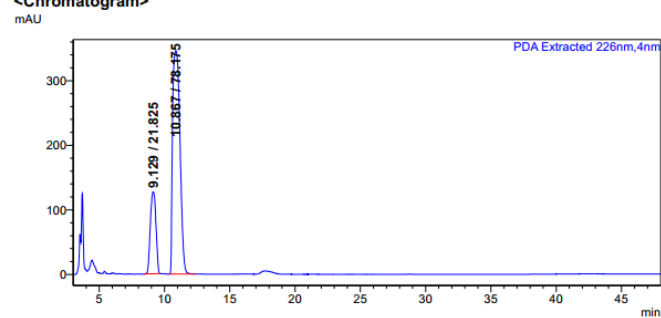

2:1

<Chromatogram>

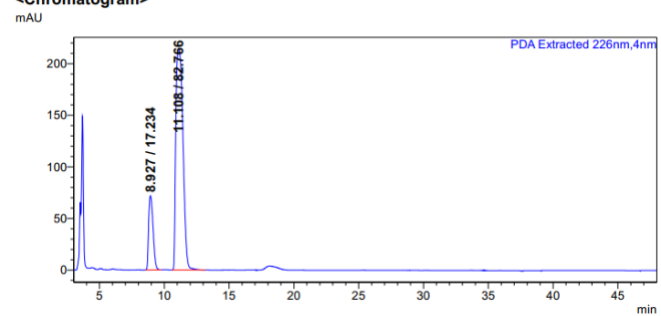

<Chromatogram>

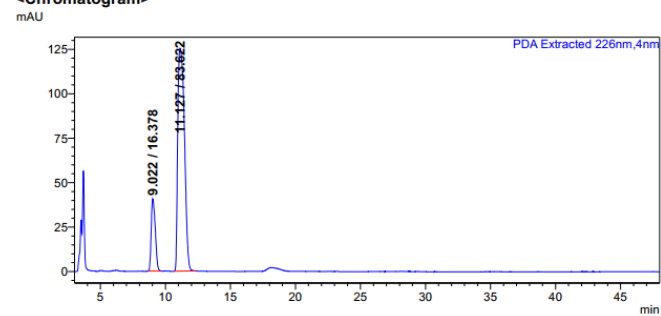

4:1

<Chromatogram>

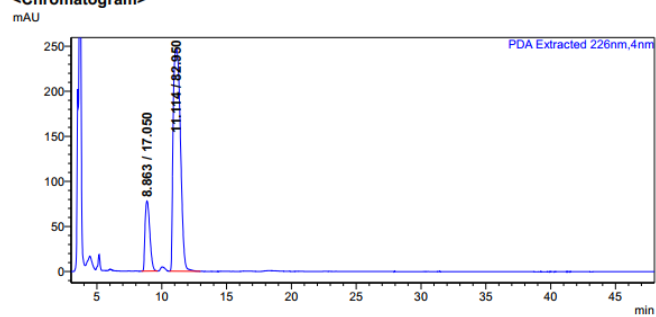

<Chromatogram>

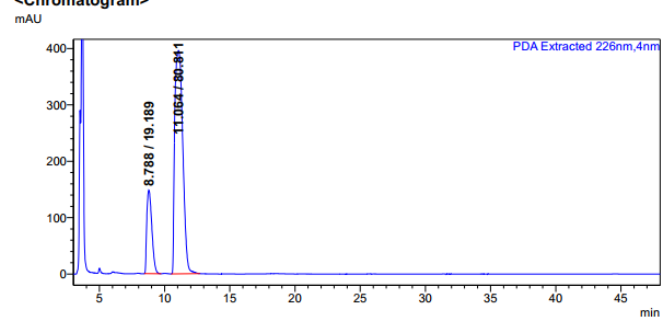

6:1

<Chromatogram>

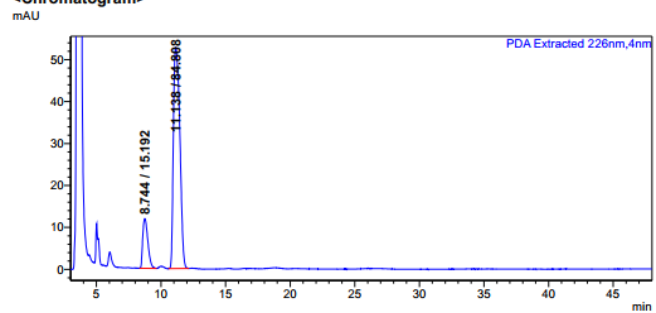

<Chromatogram>

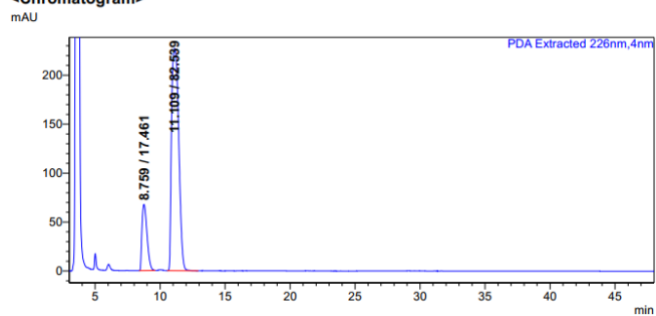



## 16.10 Non-linear experiments (table S10)

0 mol%

<Chromatogram>

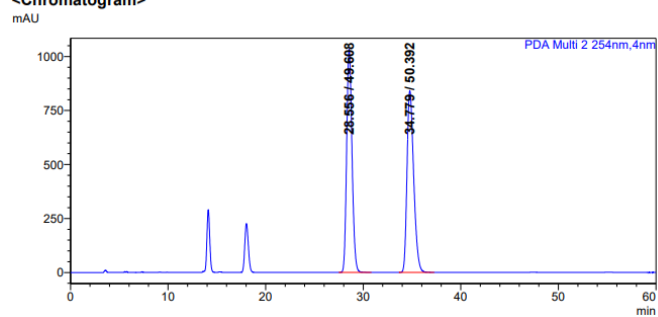

<Chromatogram>

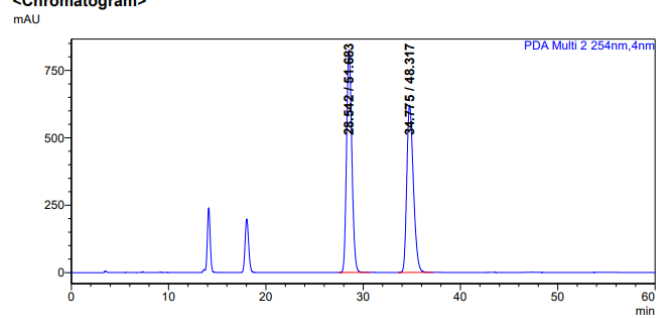

25% ee

<Chromatogram>

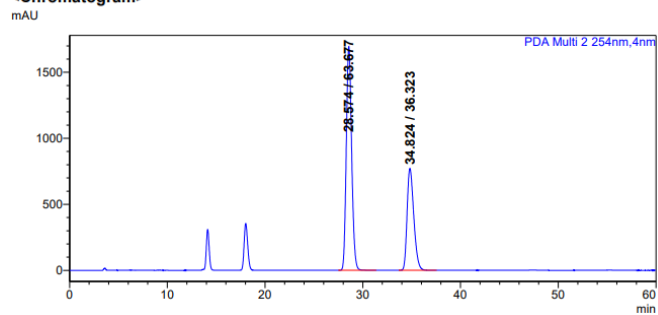

<Chromatogram>

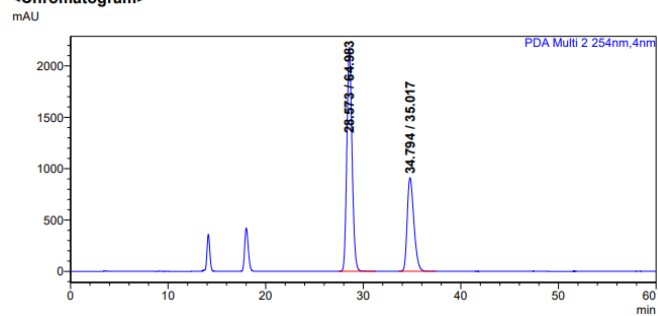

50% ee

<Chromatogram>

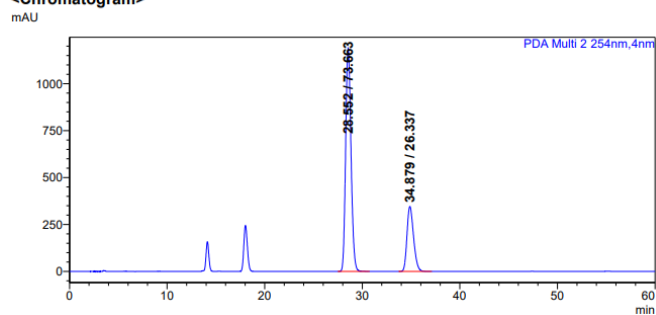

<Chromatogram>

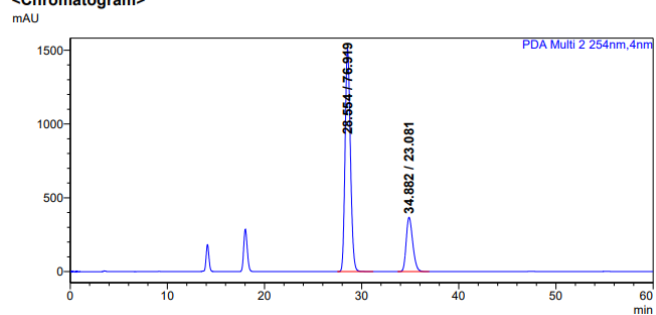

75% ee

<Chromatogram>

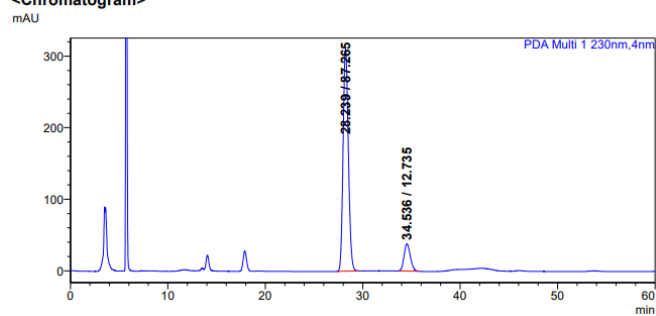

<Chromatogram>

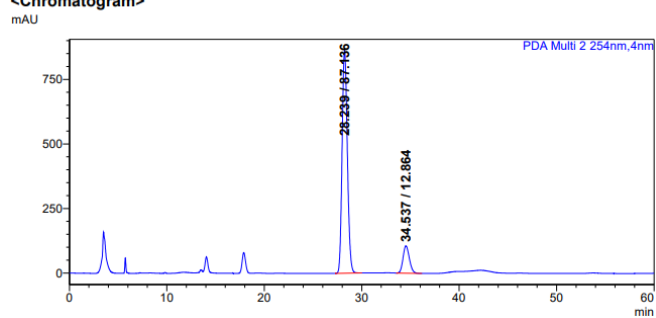

99% ee

<Chromatogram>

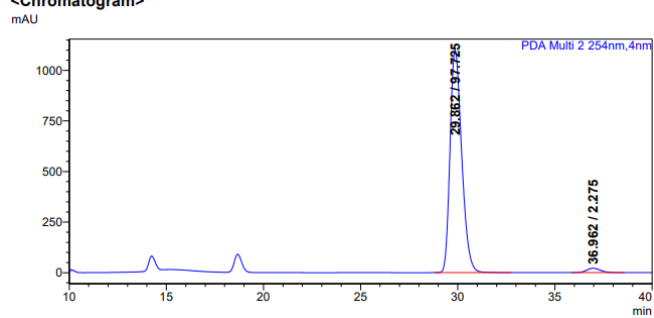

<Chromatogram>

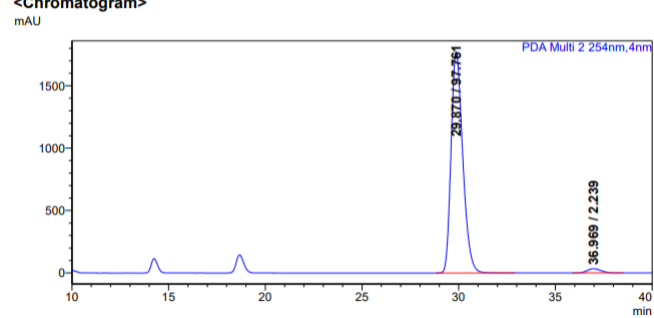

## 17. NMR spectra of aldol adducts after purification

### $^1\text{H}$ -NMR

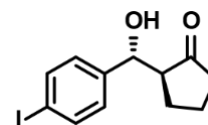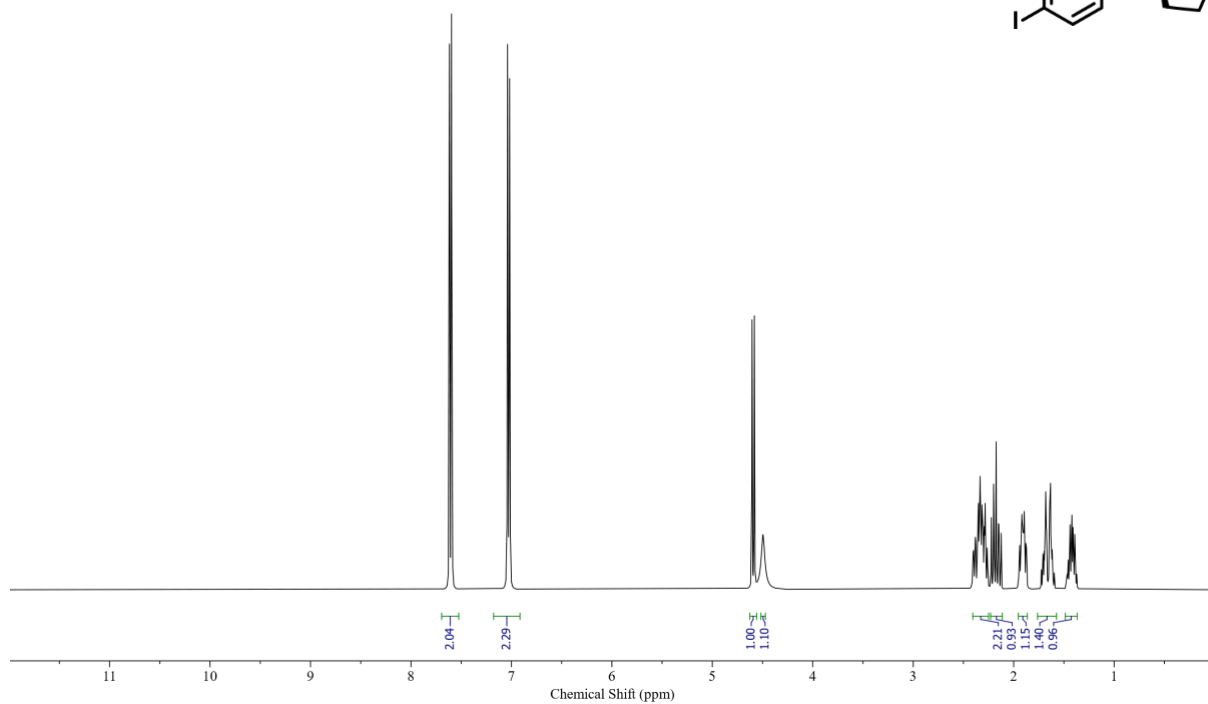

$^1\text{H}$  NMR (400 MHz,  $\text{CDCl}_3$ )  $\delta$  7.61 (d,  $J$  = 8.3 Hz, 2H), 7.03 (d,  $J$  = 8.3 Hz, 2H), 4.59 (d,  $J$  = 9.1 Hz, 1H), 4.49 (s, 1H), 2.45 – 2.25 (m, 2H), 2.17 (ddd,  $J$  = 19.5, 10.8, 9.0 Hz, 1H), 1.96 – 1.84 (m, 1H), 1.66 (dddd,  $J$  = 14.3, 8.4, 7.3, 3.5 Hz, 2H), 1.47 – 1.34 (m, 1H).

### $^{13}\text{C}$ -NMR

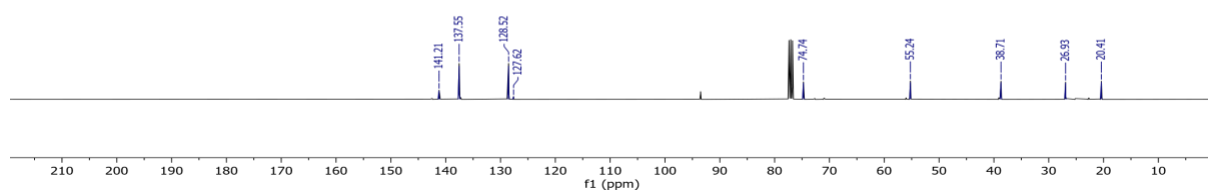

$^{13}\text{C}$  NMR (101 MHz,  $\text{CDCl}_3$ )  $\delta$  141.21, 137.55, 128.52, 93.51, 74.74, 55.24, 38.71, 26.93, 20.41.

$^{13}\text{C}$ -DEPT NMR

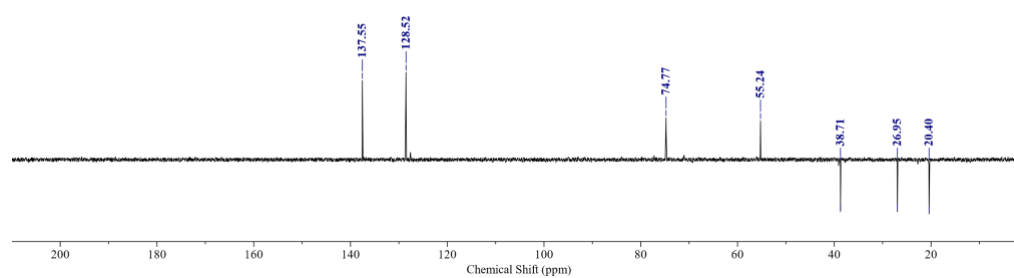

$^{13}\text{C}$  NMR (101 MHz,  $\text{CDCl}_3$ )  $\delta$  137.55, 128.52, 74.77, 55.24, 38.71, 26.95, 20.40.

# <sup>1</sup>H-NMR

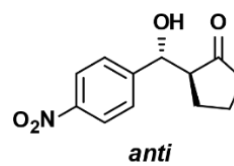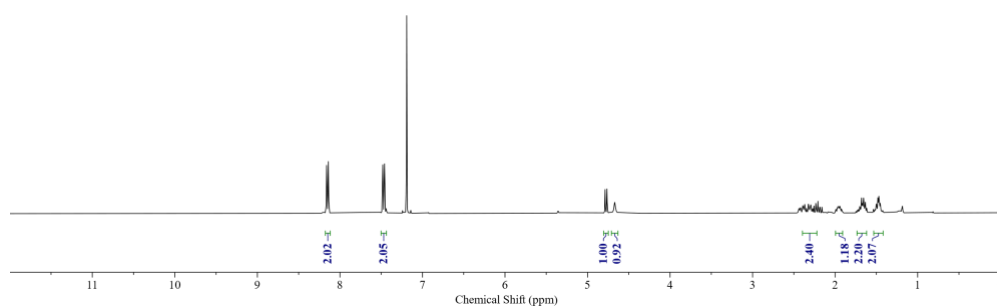

<sup>1</sup>H NMR (400 MHz, CDCl<sub>3</sub>)  $\delta$  8.15 (d,  $J$  = 8.6 Hz, 2H), 7.47 (d,  $J$  = 8.7 Hz, 2H), 4.78 (d,  $J$  = 9.2 Hz, 1H), 4.67 (s, 1H), 2.47 – 2.15 (m, 2H), 2.01 – 1.90 (m, 1H), 1.72 – 1.60 (m, 2H), 1.48 (q,  $J$  = 6.7 Hz, 2H).

# <sup>13</sup>C-NMR

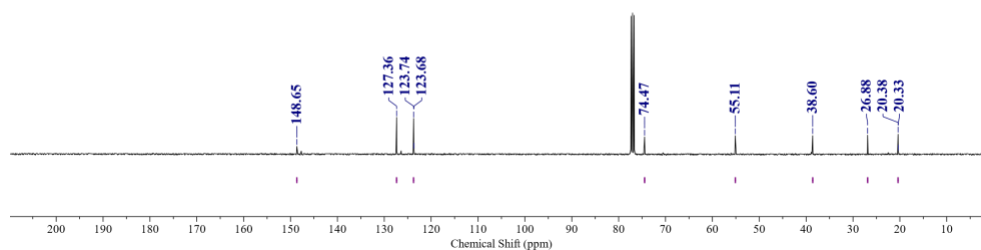

<sup>13</sup>C NMR (101 MHz, CDCl<sub>3</sub>)  $\delta$  148.65, 127.36, 123.74, 74.47, 55.11, 38.60, 26.88, 20.38.

# <sup>1</sup>H-NMR

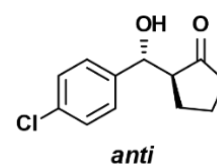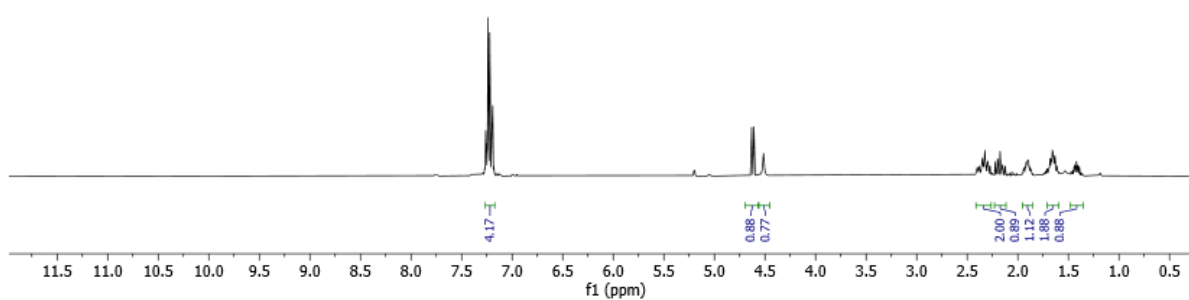

<sup>1</sup>H NMR (400 MHz, CDCl<sub>3</sub>) δ 7.54 – 6.96 (m, 4H), 4.62 (d, *J* = 9.1 Hz, 1H), 4.51 (s, 1H), 2.46 – 2.26 (m, 2H), 2.17 (ddd, *J* = 19.5, 10.7, 9.0 Hz, 1H), 1.96 – 1.86 (m, 1H), 1.72 – 1.61 (m, 2H), 1.48 – 1.36 (m, 1H).

# <sup>13</sup>C-NMR

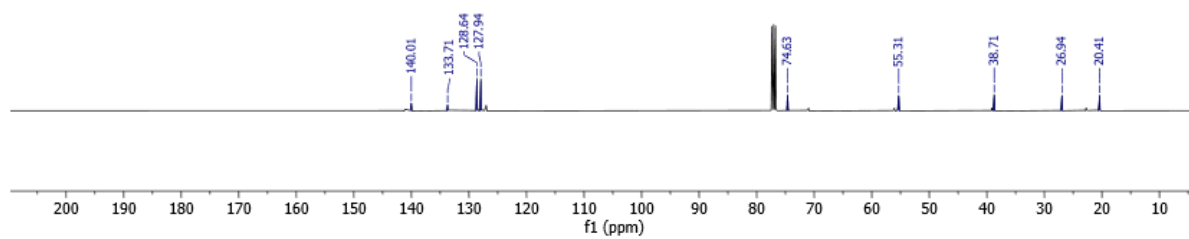

<sup>13</sup>C NMR (101 MHz, CDCl<sub>3</sub>) δ 140.01, 133.71, 128.64, 127.94, 74.63, 55.31, 38.71, 26.94, 20.41.

# <sup>1</sup>H-NMR

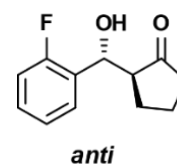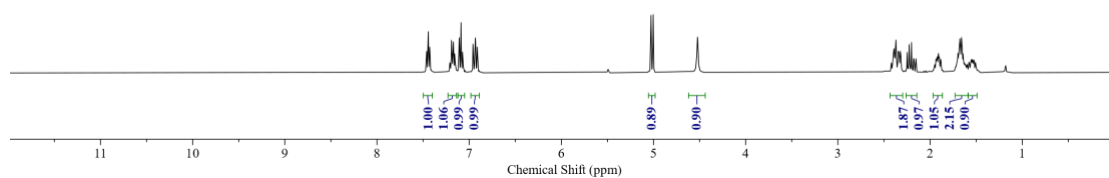

<sup>1</sup>H NMR (400 MHz, CDCl<sub>3</sub>) δ 7.44 (td,  $J = 7.5, 1.9$  Hz, 1H), 7.17 (ddd,  $J = 7.4, 5.5, 2.1$  Hz, 1H), 7.09 (td,  $J = 7.5, 1.3$  Hz, 1H), 6.93 (ddd,  $J = 9.7, 8.2, 1.3$  Hz, 1H), 5.02 (d,  $J = 9.5$  Hz, 1H), 4.52 (s, 1H), 2.44 – 2.30 (m, 2H), 2.20 (ddd,  $J = 19.3, 10.3, 8.7$  Hz, 1H), 1.92 (dddd,  $J = 12.5, 10.3, 7.3, 2.2$  Hz, 1H), 1.76 – 1.60 (m, 2H), 1.54 (dddd,  $J = 12.6, 7.7, 5.7, 2.1$  Hz, 1H).

# <sup>13</sup>C-NMR

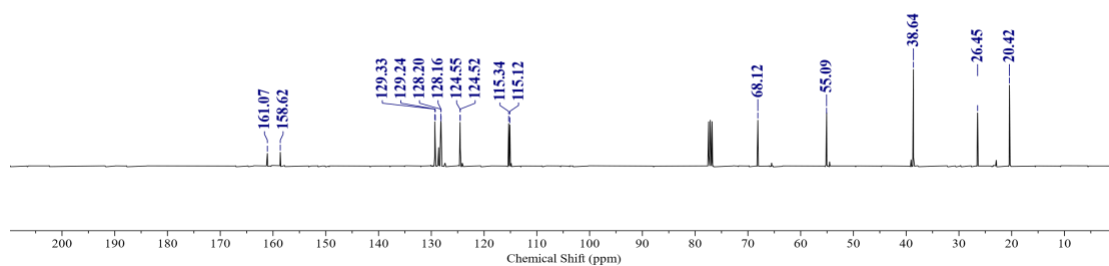

<sup>13</sup>C NMR (101 MHz, CDCl<sub>3</sub>) δ 161.07, 158.62, 129.33, 129.24, 128.20, 128.16, 124.55, 124.52, 115.34, 115.12, 68.12, 55.09, 38.64, 26.45, 20.42.



# <sup>1</sup>H-NMR

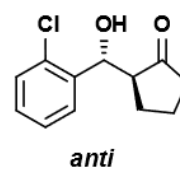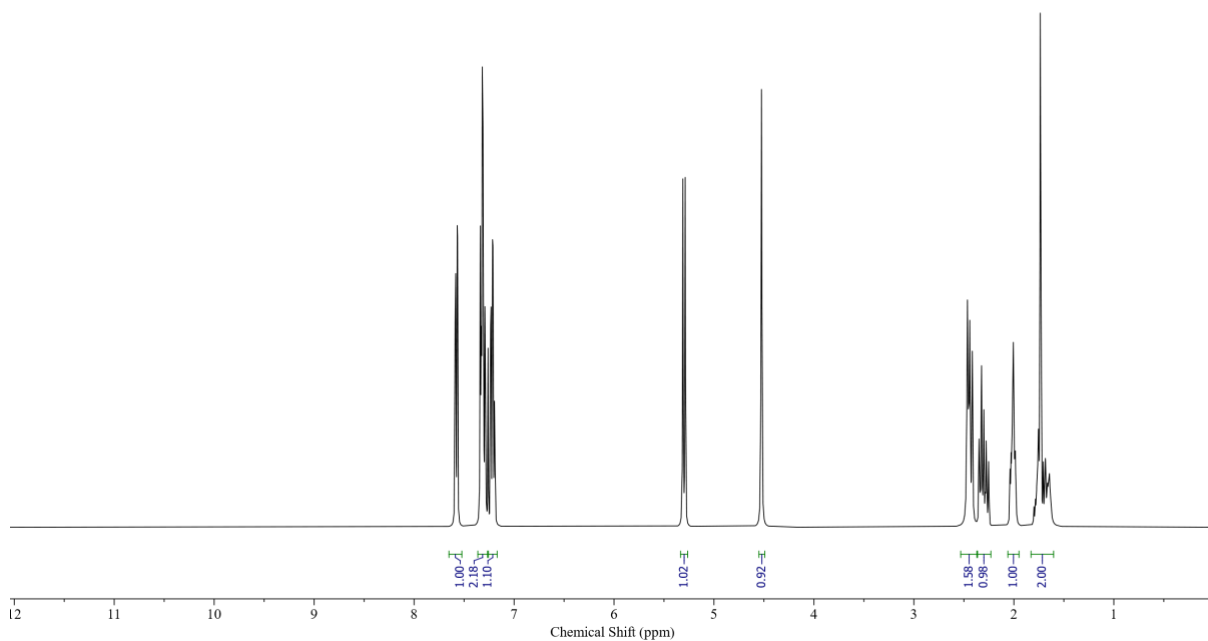

<sup>1</sup>H NMR (400 MHz, CDCl<sub>3</sub>) δ 7.58 (dd,  $J = 7.7, 1.7$  Hz, 1H), 7.36 – 7.27 (m, 2H), 7.21 (td,  $J = 7.6, 1.8$  Hz, 1H), 5.30 (d,  $J = 9.3$  Hz, 1H), 4.52 (s, 1H), 2.53 – 2.36 (m, 2H), 2.37 – 2.23 (m, 1H), 2.06 – 1.95 (m, 1H), 1.83 – 1.60 (m, 2H).

# <sup>13</sup>C-NMR

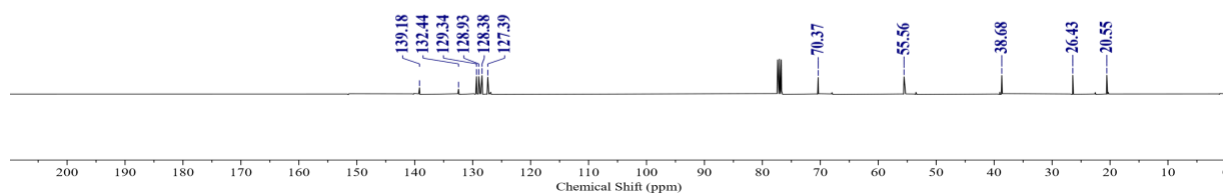

<sup>13</sup>C NMR (101 MHz, CDCl<sub>3</sub>) δ 139.18, 132.44, 129.34, 128.93, 128.38, 127.39, 70.37, 55.56, 38.68, 26.43, 20.55.

# <sup>1</sup>H-NMR

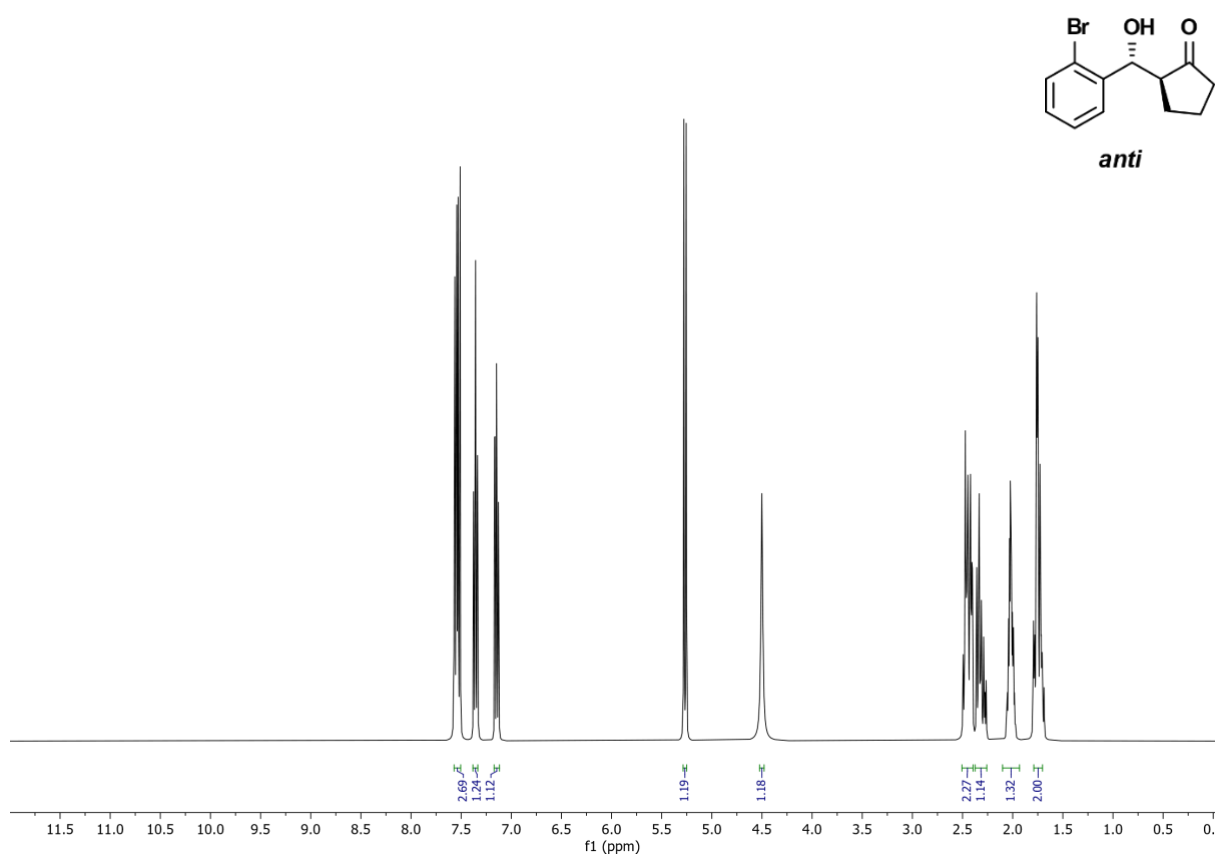

<sup>1</sup>H NMR (400 MHz, CDCl<sub>3</sub>) δ 7.54 (ddd,  $J$  = 13.4, 7.9, 1.5 Hz, 2H), 7.36 (td,  $J$  = 7.6, 1.3 Hz, 1H), 7.15 (td,  $J$  = 7.7, 1.8 Hz, 1H), 5.27 (d,  $J$  = 9.3 Hz, 1H), 4.50 (s, 1H), 2.51 – 2.39 (m, 2H), 2.36 – 2.26 (m, 1H), 2.02 (tdt,  $J$  = 8.0, 5.5, 3.2 Hz, 1H), 1.79 – 1.66 (m, 3H).

# <sup>13</sup>C-NMR

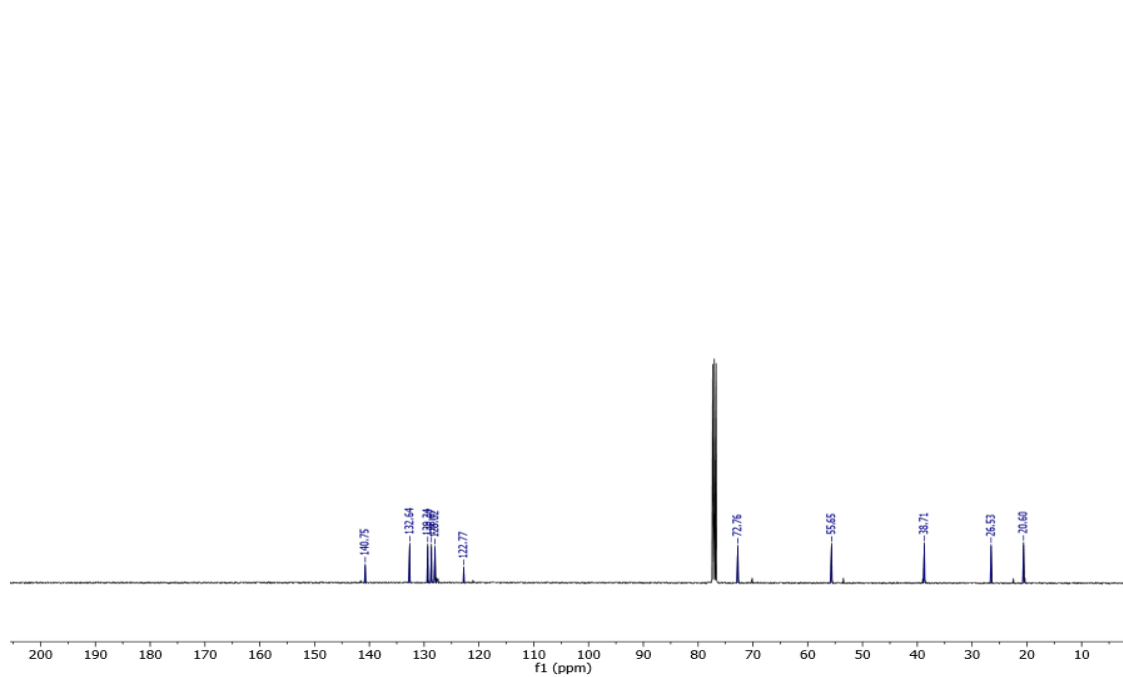

<sup>13</sup>C NMR (101 MHz, CDCl<sub>3</sub>) δ 140.75, 132.64, 129.34, 128.67, 128.02, 122.77, 72.76, 55.65, 38.71, 26.53, 20.60.

<sup>1</sup>H-NMR

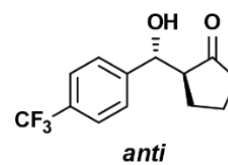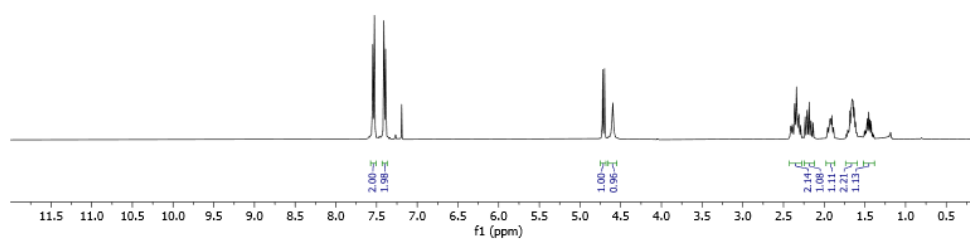

<sup>1</sup>H NMR (400 MHz, CDCl<sub>3</sub>)  $\delta$  7.54 (d,  $J$  = 8.1 Hz, 2H), 7.40 (d,  $J$  = 8.1 Hz, 2H), 4.71 (d,  $J$  = 9.2 Hz, 1H), 4.60 (s, 1H), 2.46 – 2.28 (m, 2H), 2.19 (ddd,  $J$  = 19.5, 10.7, 8.9 Hz, 1H), 1.93 (dddd,  $J$  = 16.0, 8.8, 5.8, 2.6 Hz, 1H), 1.74 – 1.58 (m, 2H), 1.45 (qt,  $J$  = 11.5, 5.5 Hz, 1H).

<sup>13</sup>C-NMR

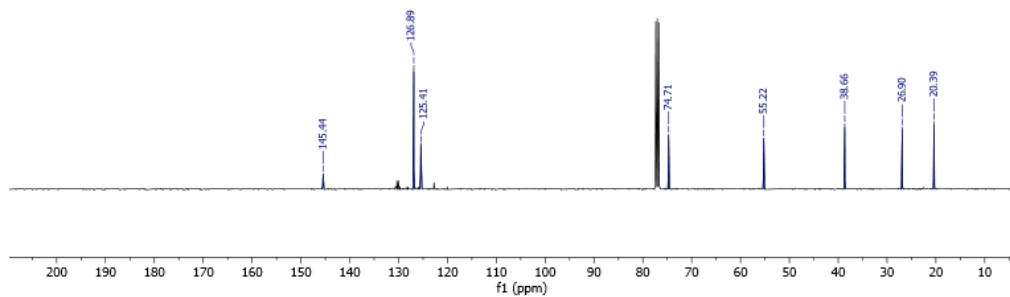

<sup>13</sup>C NMR (101 MHz, CDCl<sub>3</sub>)  $\delta$  145.44, 126.89, 125.41, 74.71, 55.22, 38.66, 26.90, 20.39.

# <sup>1</sup>H-NMR

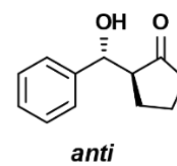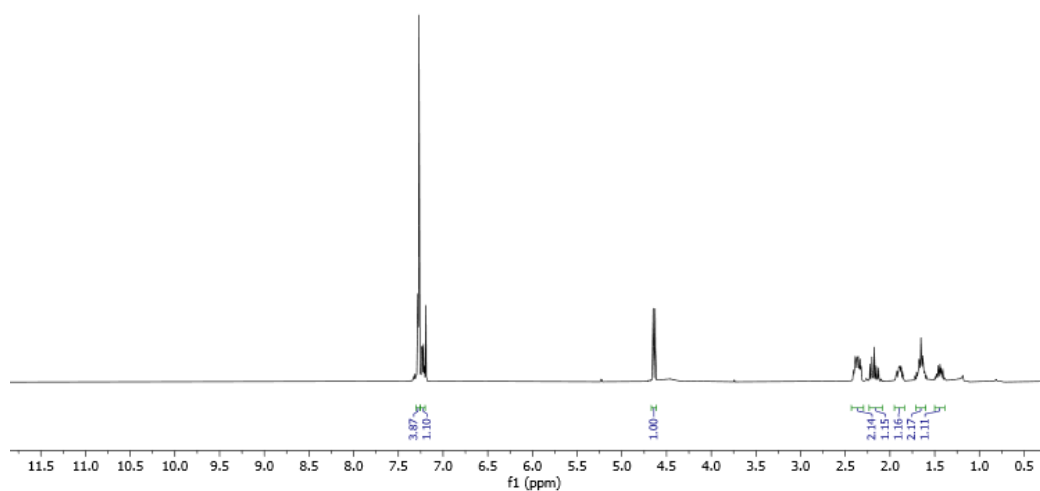

<sup>1</sup>H NMR (400 MHz, CDCl<sub>3</sub>) δ 7.27 (d, *J* = 4.4 Hz, 4H), 7.25 – 7.20 (m, 1H), 4.64 (d, *J* = 9.2 Hz, 1H), 2.44 – 2.30 (m, 2H), 2.25 – 2.09 (m, 1H), 1.89 (dddd, *J* = 16.3, 8.9, 4.2, 2.1 Hz, 1H), 1.74 – 1.56 (m, 2H), 1.51 – 1.37 (m, 1H).

# <sup>13</sup>C-NMR

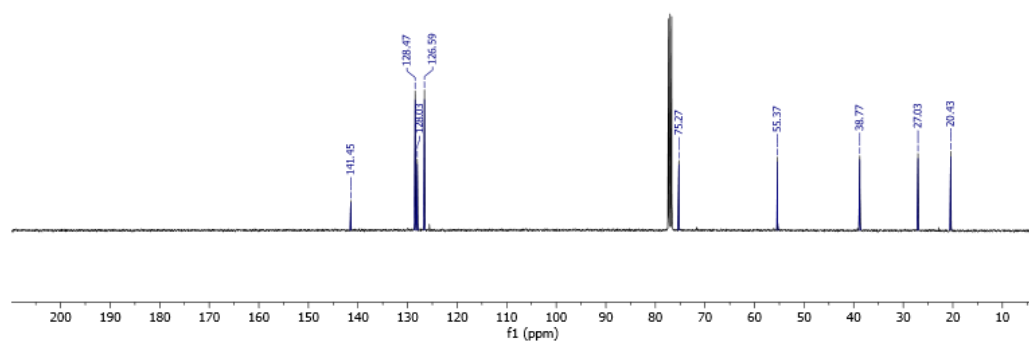

<sup>13</sup>C NMR (101 MHz, CDCl<sub>3</sub>) δ 141.45, 128.47, 128.03, 126.59, 75.27, 55.37, 38.77, 27.03, 20.43.

# <sup>1</sup>H-NMR

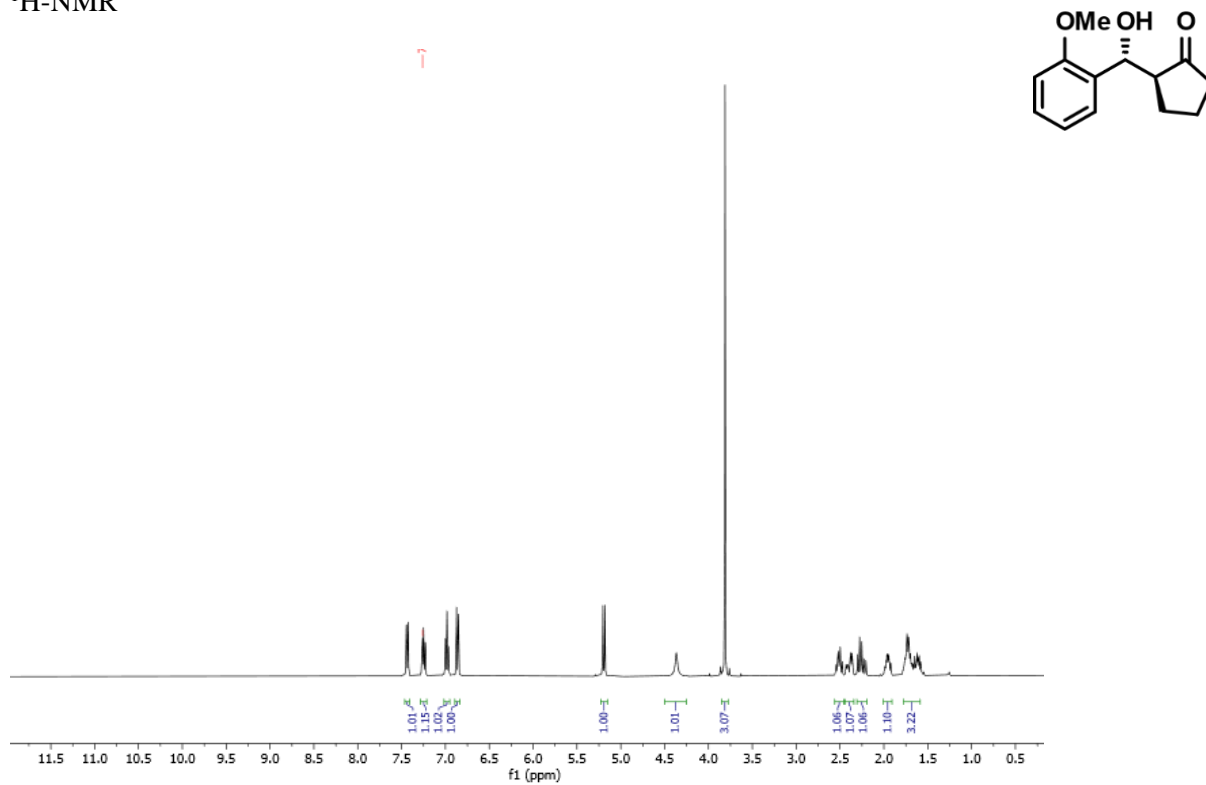

<sup>1</sup>H NMR (400 MHz, CDCl<sub>3</sub>) δ 7.43 (dd, *J* = 7.6, 1.8 Hz, 1H), 7.27 – 7.21 (m, 1H), 6.98 (td, *J* = 7.5, 1.1 Hz, 1H), 6.86 (dd, *J* = 8.3, 1.1 Hz, 1H), 5.19 (d, *J* = 9.1 Hz, 1H), 4.37 (s, 1H), 3.81 (s, 3H), 2.57 – 2.46 (m, 1H), 2.45 – 2.34 (m, 1H), 2.25 (ddd, *J* = 19.0, 10.0, 8.7 Hz, 1H), 2.00 – 1.91 (m, 1H), 1.79 – 1.57 (m, 3H).

# <sup>13</sup>C-NMR

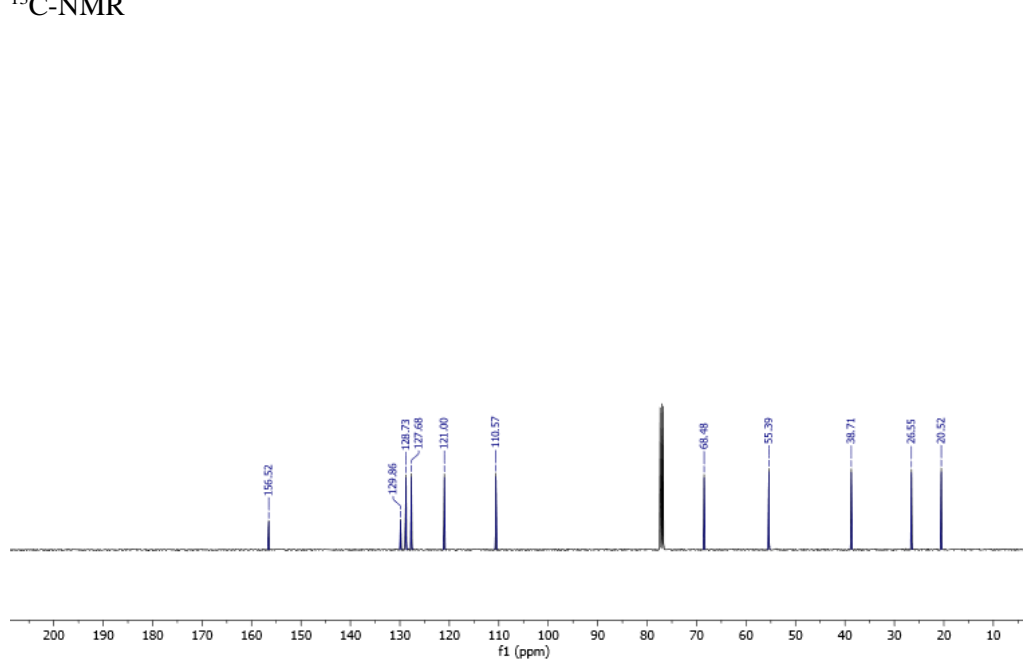

<sup>13</sup>C NMR (101 MHz, CDCl<sub>3</sub>) δ 156.52, 129.86, 128.73, 127.68, 121.00, 110.57, 68.48, 55.39, 38.71, 26.55, 20.52.

$^1\text{H}$ -NMR

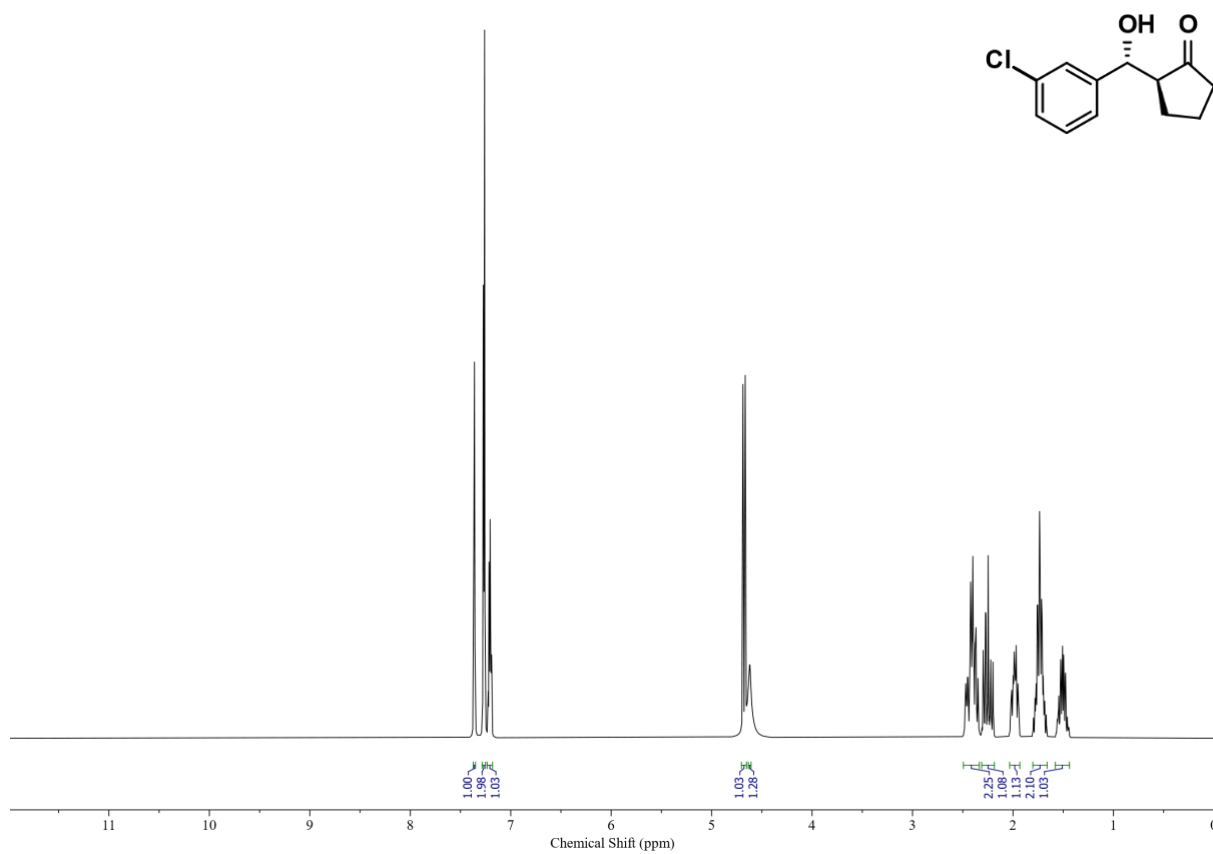

$^{13}\text{C}$ -NMR

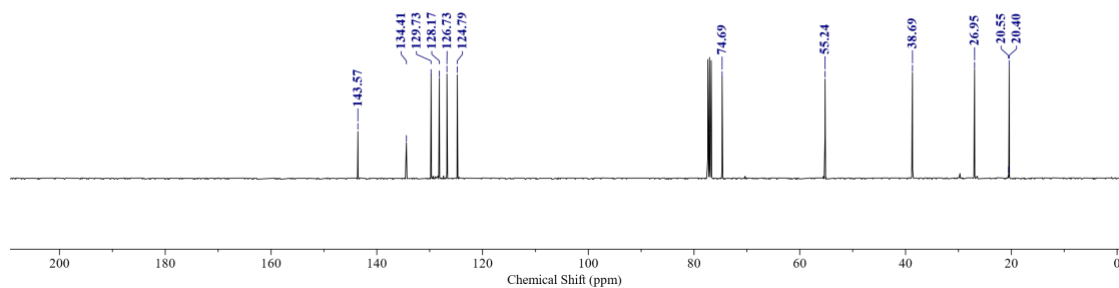

$^{13}\text{C}$  NMR (101 MHz,  $\text{CDCl}_3$ )  $\delta$  143.57, 134.41, 129.73, 128.17, 126.73, 124.79, 74.69, 55.24, 38.69, 26.95, 20.40.

<sup>1</sup>H-NMR

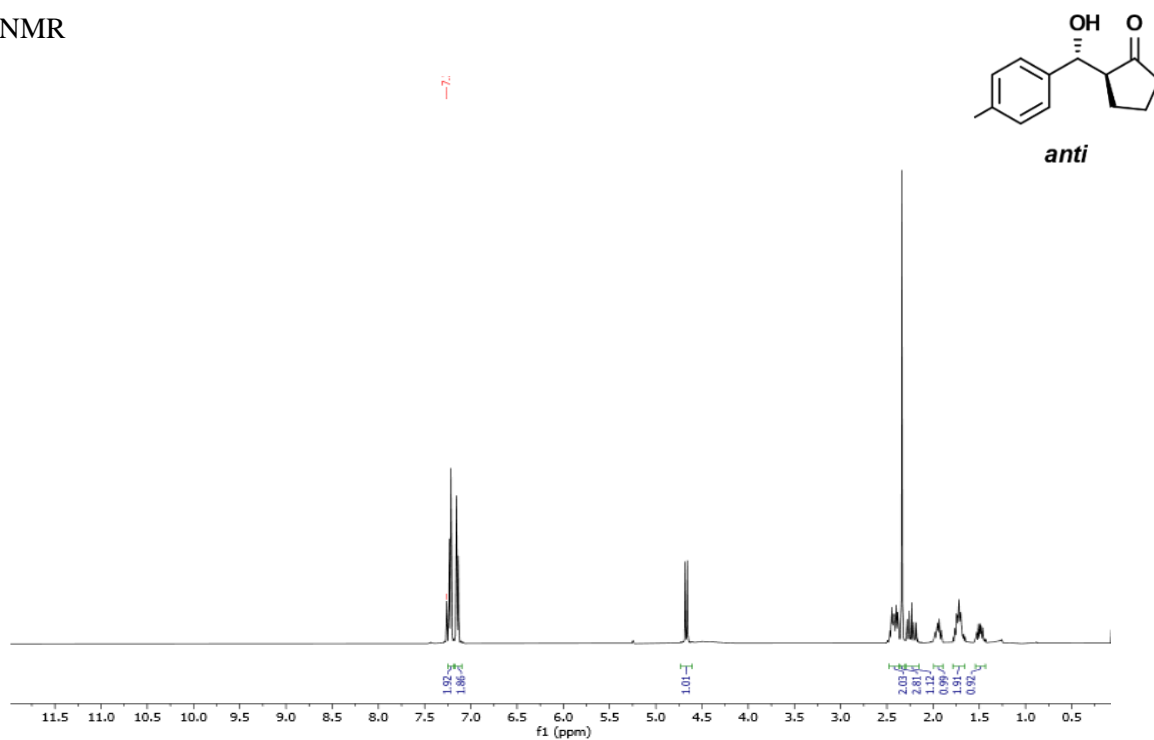

<sup>1</sup>H NMR (400 MHz, CDCl<sub>3</sub>) δ 7.24 – 7.20 (m, 2H), 7.15 (d, *J* = 7.9 Hz, 2H), 4.67 (d, *J* = 9.1 Hz, 1H), 2.48 – 2.37 (m, 2H), 2.34 (s, 3H), 2.29 – 2.17 (m, 1H), 1.95 (dddd, *J* = 12.6, 8.5, 6.6, 2.2 Hz, 1H), 1.79 – 1.65 (m, 2H), 1.56 – 1.42 (m, 1H).

<sup>13</sup>C-NMR

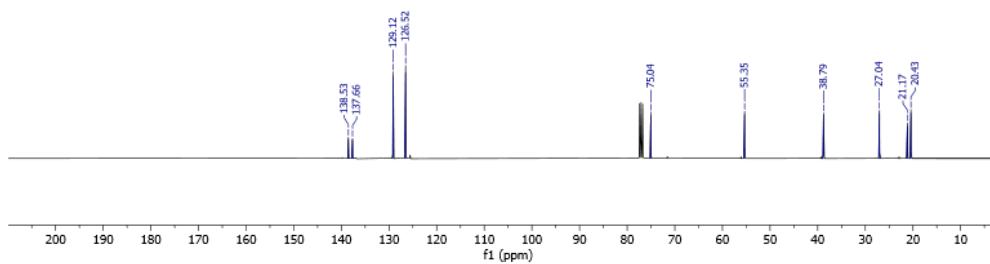

<sup>13</sup>C NMR (101 MHz, CDCl<sub>3</sub>) δ 138.53, 137.66, 129.12, 126.52, 75.04, 55.35, 38.79, 27.04, 21.17, 20.43.

# <sup>1</sup>H-NMR

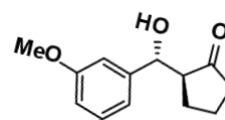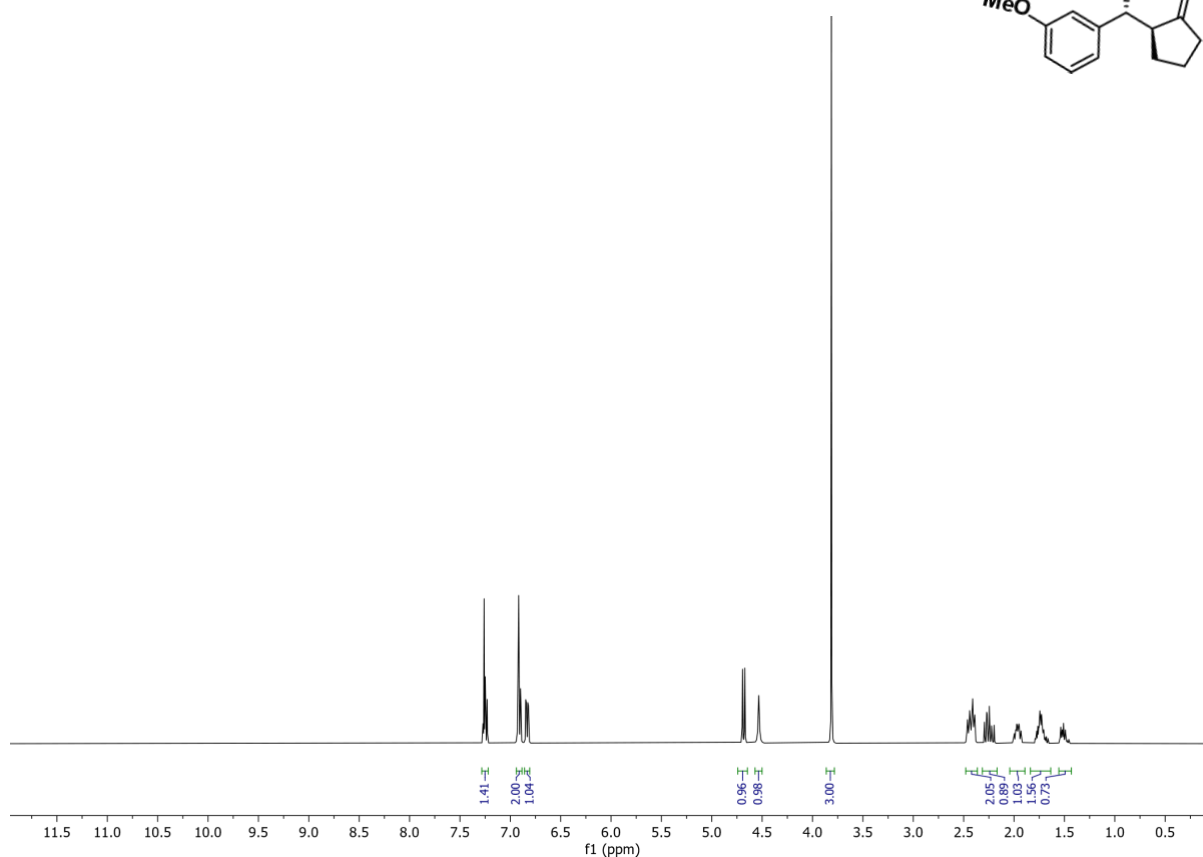

<sup>1</sup>H NMR (400 MHz, CDCl<sub>3</sub>)  $\delta$  7.28 – 7.22 (m, 1H), 6.94 – 6.88 (m, 2H), 6.83 (ddd,  $J$  = 8.2, 2.6, 1.1 Hz, 1H), 4.68 (d,  $J$  = 9.1 Hz, 1H), 4.53 (s, 1H), 3.81 (s, 3H), 2.48 – 2.36 (m, 2H), 2.25 (ddd,  $J$  = 19.4, 10.5, 8.7 Hz, 1H), 2.04 – 1.89 (m, 1H), 1.84 – 1.64 (m, 2H), 1.56 – 1.43 (m, 1H).

# <sup>13</sup>C-NMR

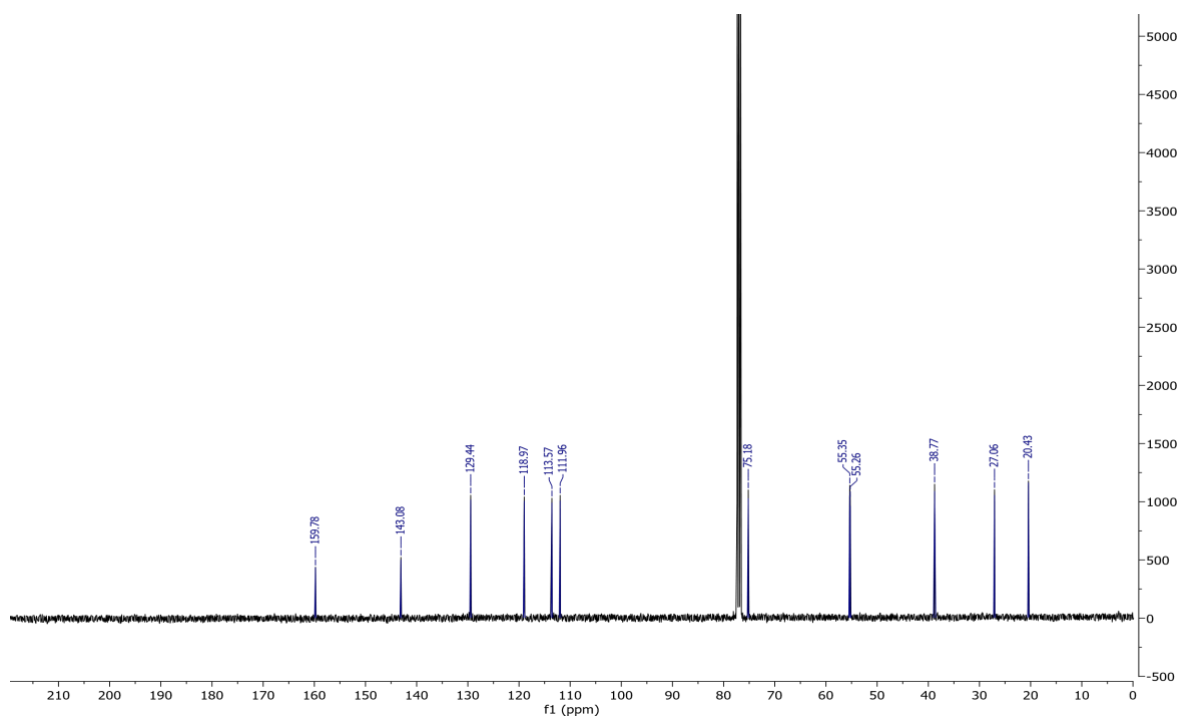

<sup>13</sup>C NMR (101 MHz, CDCl<sub>3</sub>)  $\delta$  159.78, 143.08, 129.44, 118.97, 113.57, 111.96, 75.18, 55.35, 55.26, 38.77, 27.06, 20.43.



# <sup>1</sup>H-NMR

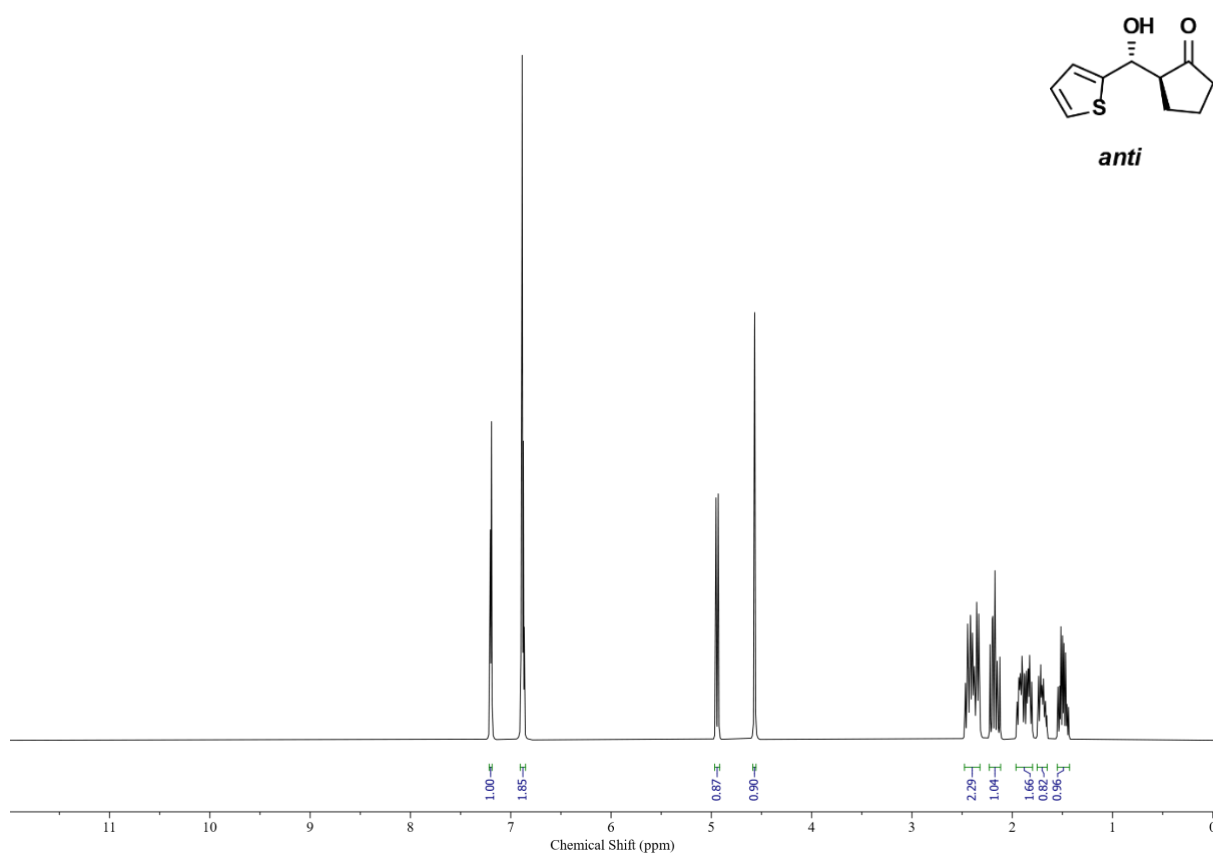

<sup>1</sup>H NMR (400 MHz, CDCl<sub>3</sub>)  $\delta$  7.20 (dd,  $J$  = 4.7, 1.5 Hz, 1H), 6.91 – 6.85 (m, 2H), 4.94 (d,  $J$  = 9.0 Hz, 1H), 4.57 (d,  $J$  = 1.3 Hz, 1H), 2.48 – 2.32 (m, 2H), 2.17 (ddd,  $J$  = 19.4, 10.9, 8.7 Hz, 1H), 1.96 – 1.80 (m, 2H), 1.70 (dddd,  $J$  = 17.7, 8.5, 4.6, 2.6 Hz, 1H), 1.49 (qd,  $J$  = 11.8, 6.8 Hz, 1H).

# <sup>13</sup>C-NMR

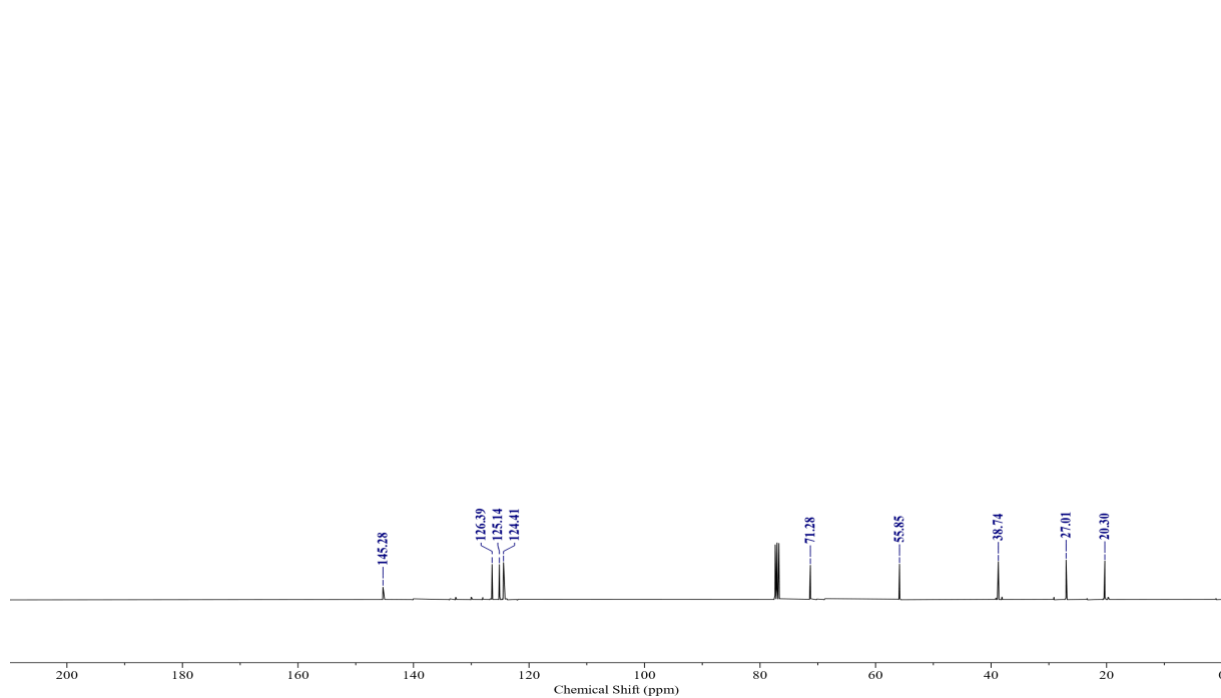

<sup>13</sup>C NMR (101 MHz, CDCl<sub>3</sub>)  $\delta$  145.28, 126.39, 125.14, 124.41, 71.28, 55.85, 38.74, 27.01, 20.30.

# <sup>1</sup>H-NMR

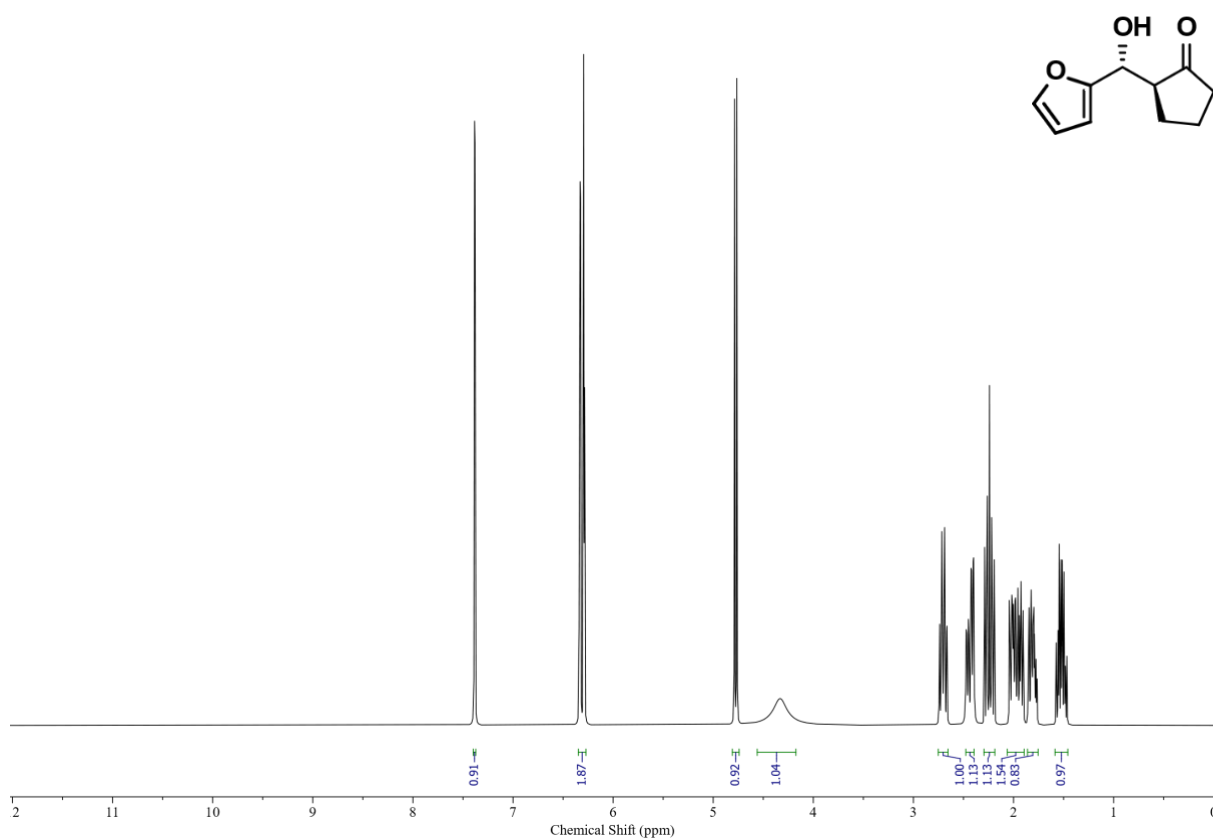

<sup>1</sup>H NMR (400 MHz, CDCl<sub>3</sub>) δ 7.38 (dd, *J* = 1.9, 0.8 Hz, 1H), 6.31 (ddd, *J* = 16.0, 3.2, 1.3 Hz, 2H), 4.78 (d, *J* = 9.1 Hz, 1H), 4.33 (s, 1H), 2.75 – 2.65 (m, 1H), 2.44 (ddd, *J* = 19.2, 8.5, 2.1 Hz, 1H), 2.24 (ddd, *J* = 19.3, 10.8, 8.8 Hz, 1H), 2.06 – 1.89 (m, 2H), 1.86 – 1.76 (m, 1H), 1.52 (qd, *J* = 11.8, 7.0 Hz, 1H).

# <sup>13</sup>C-NMR

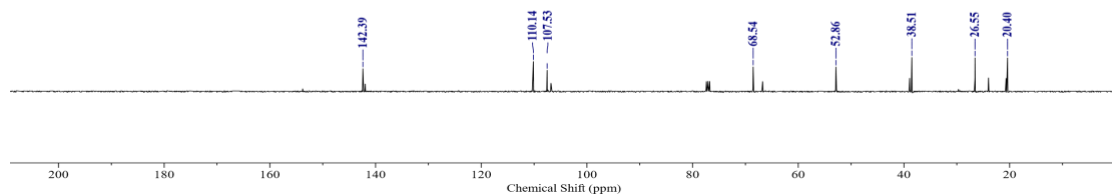

<sup>13</sup>C NMR (101 MHz, CDCl<sub>3</sub>) δ 142.39, 110.14, 107.53, 68.54, 52.86, 38.51, 26.55, 20.40.

# <sup>1</sup>H-NMR

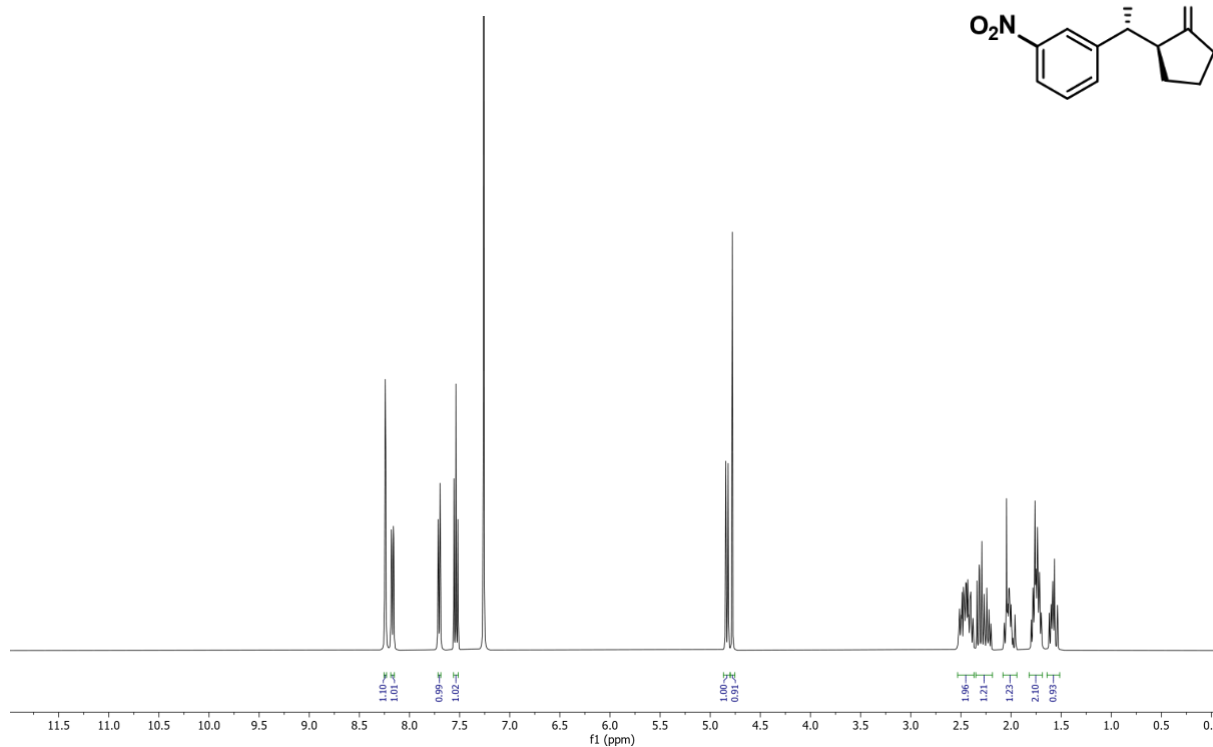

<sup>1</sup>H NMR (400 MHz, CDCl<sub>3</sub>) δ 8.24 (t, *J* = 2.1 Hz, 1H), 8.17 (ddd, *J* = 8.1, 2.4, 1.1 Hz, 1H), 7.72 – 7.69 (m, 1H), 7.54 (t, *J* = 7.9 Hz, 1H), 4.83 (d, *J* = 9.3 Hz, 1H), 4.78 (d, *J* = 1.0 Hz, 1H), 2.53 – 2.37 (m, 2H), 2.35 – 2.18 (m, 1H), 2.08 – 1.94 (m, 1H), 1.82 – 1.69 (m, 2H), 1.57 (s, 1H).

# <sup>13</sup>C-NMR

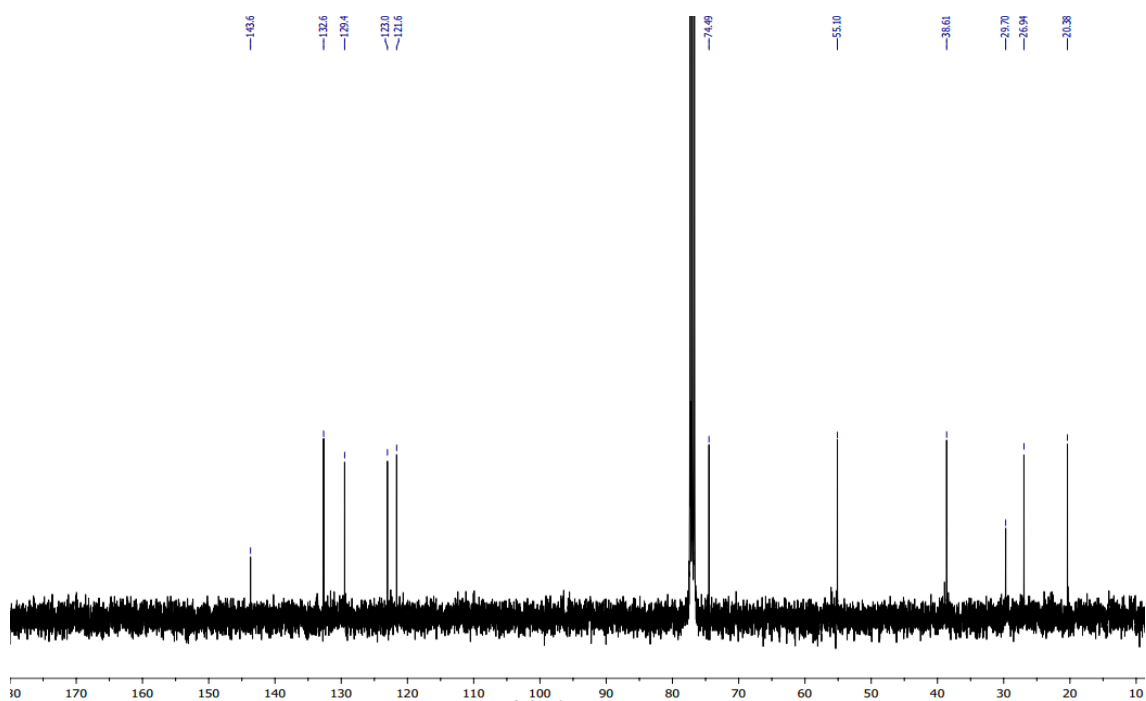

<sup>13</sup>C NMR (101 MHz, CDCl<sub>3</sub>) δ 143.69, 132.66, 129.48, 123.03, 121.63, 74.49, 55.10, 38.61, 29.70, 26.94, 20.38.

# <sup>1</sup>H-NMR

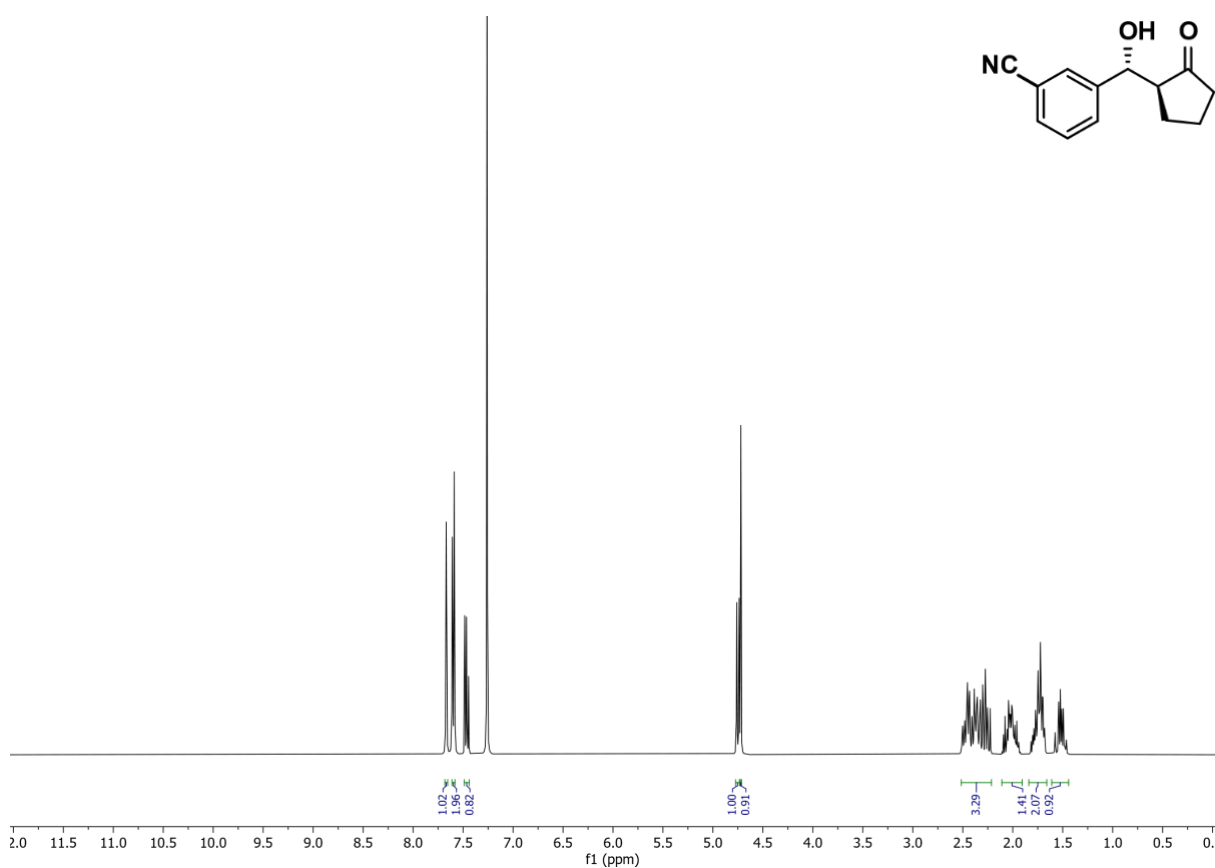

<sup>1</sup>H NMR (400 MHz, CDCl<sub>3</sub>) δ 7.67 (d, *J* = 1.8 Hz, 1H), 7.60 (dd, *J* = 7.8, 1.7 Hz, 2H), 7.49 – 7.44 (m, 1H), 4.75 (d, *J* = 9.3 Hz, 1H), 4.72 (d, *J* = 1.1 Hz, 1H), 2.52 – 2.21 (m, 3H), 2.11 – 1.91 (m, 1H), 1.84 – 1.66 (m, 2H), 1.61 – 1.44 (m, 1H).

# <sup>13</sup>C-NMR

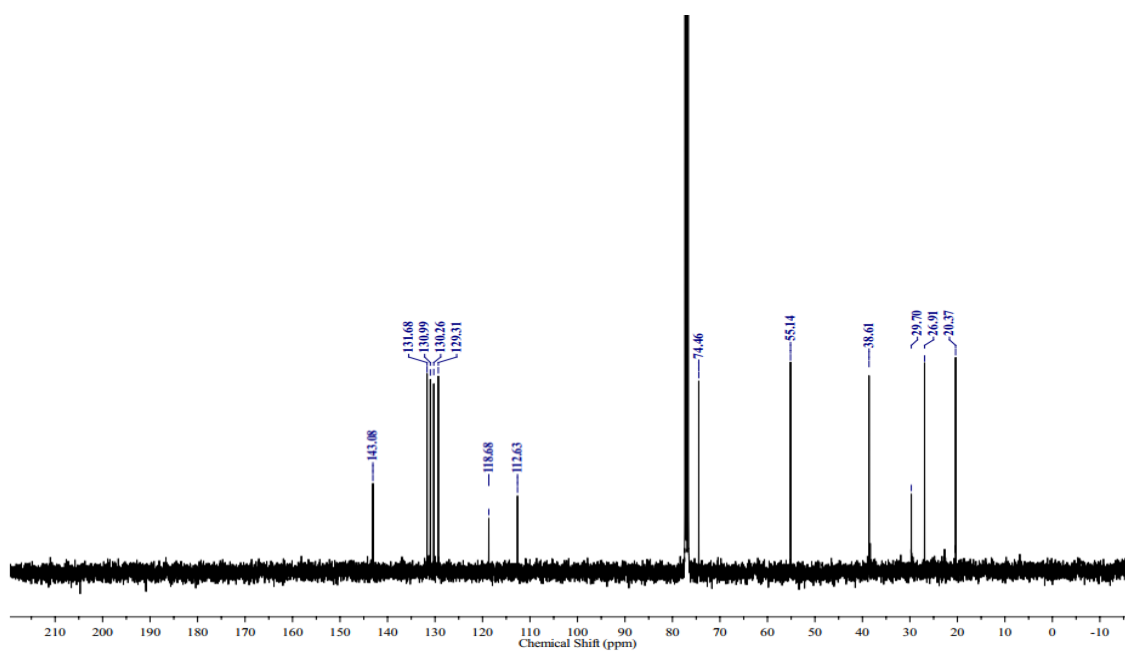

<sup>13</sup>C NMR (101 MHz, CDCl<sub>3</sub>) δ 143.08, 131.68, 130.99, 130.26, 129.31, 118.68, 112.63, 74.46, 55.14, 38.61, 29.70, 26.91, 20.37.

$^1\text{H-NMR}^1$

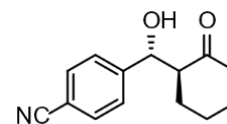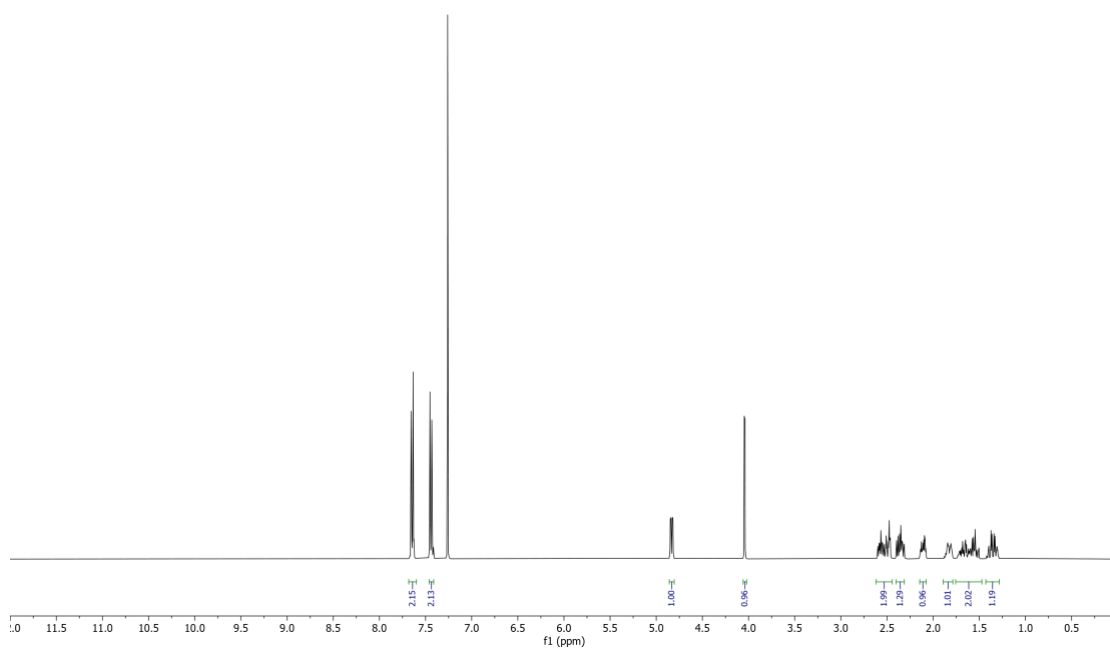

$^1\text{H-NMR}$  (400 MHz,  $\text{CDCl}_3$ )  $\delta$  7.68 – 7.60 (m, 2H), 7.46 – 7.41 (m, 2H), 4.83 (dd,  $J$  = 8.5, 3.1 Hz, 1H), 4.04 (d,  $J$  = 3.1 Hz, 1H), 2.62 – 2.44 (m, 2H), 2.40 – 2.31 (m, 1H), 2.11 (ddt,  $J$  = 12.1, 5.7, 2.9 Hz, 1H), 1.89 – 1.79 (m, 1H), 1.76 – 1.47 (m, 2H), 1.43 – 1.28 (m, 1H).

$^{13}\text{C-NMR}^{13}$

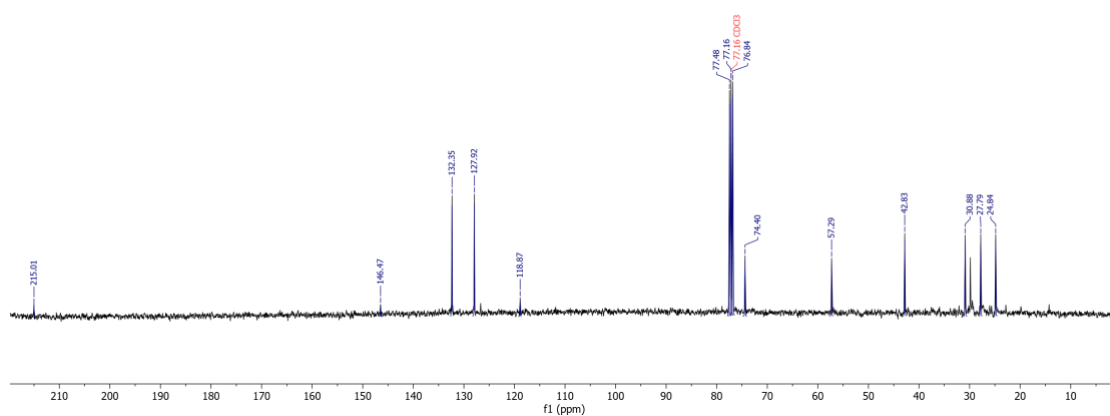

$^{13}\text{C-NMR}$  (101 MHz,  $\text{CDCl}_3$ )  $\delta$  215.01, 146.47, 132.35, 127.92, 118.87, 77.48, 77.16, 76.84, 74.40, 57.29, 42.83, 30.88, 27.79, 24.84.

# <sup>1</sup>H-NMR

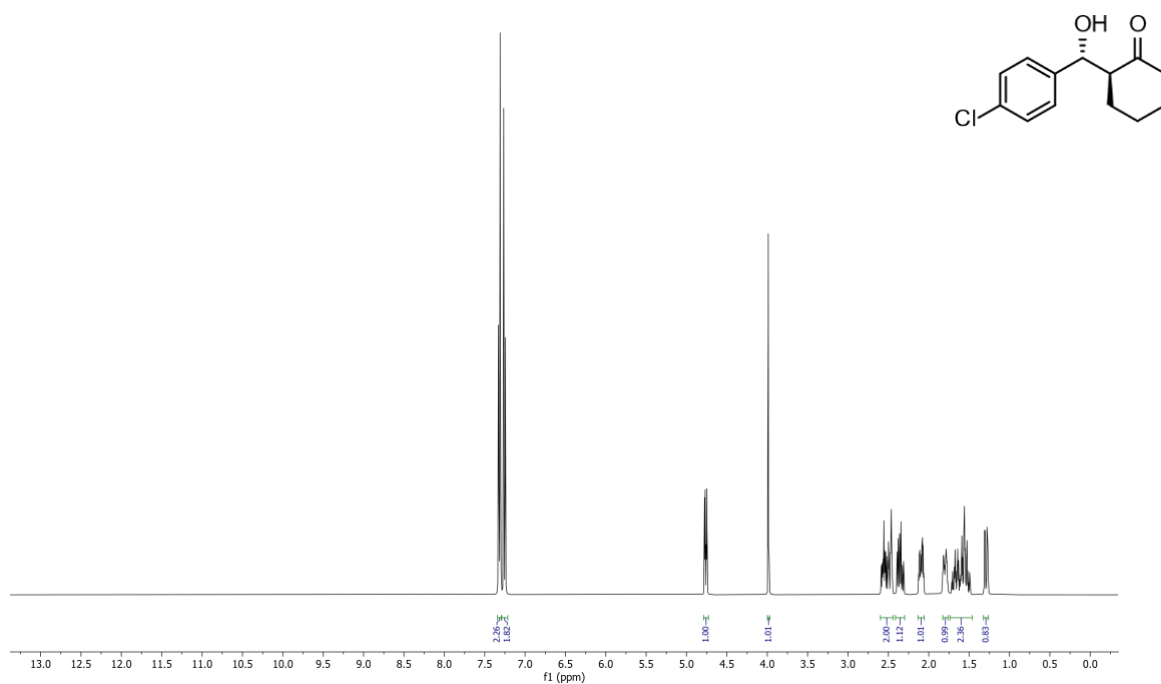

<sup>1</sup>H NMR (400 MHz, CDCl<sub>3</sub>) δ 7.34 – 7.29 (m, 2H), 7.29 – 7.21 (m, 2H), 4.76 (dd, *J* = 8.7, 2.8 Hz, 1H), 3.98 (d, *J* = 2.8 Hz, 1H), 2.60 – 2.44 (m, 2H), 2.35 (tdd, *J* = 13.6, 6.2, 1.3 Hz, 1H), 2.09 (ddt, *J* = 12.2, 5.8, 2.8 Hz, 1H), 1.79 (dq, *J* = 10.4, 3.3, 1.7 Hz, 1H), 1.74 – 1.46 (m, 2H), 1.32 – 1.26 (m, 1H).

## C-NMR<sup>13</sup>

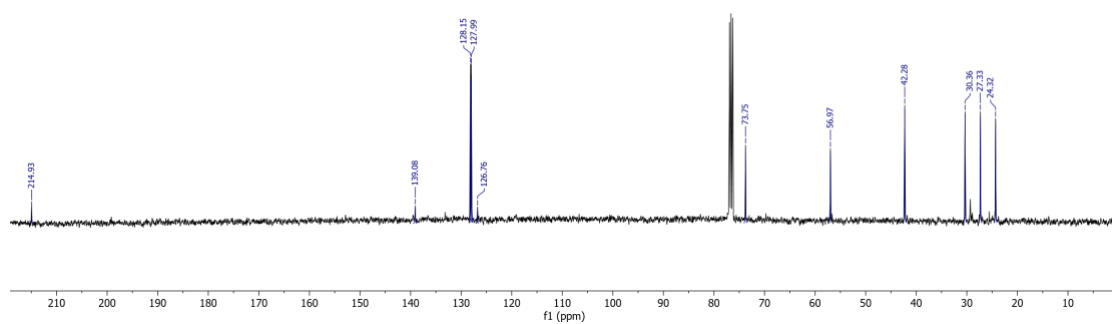

<sup>13</sup>C NMR (101 MHz, CDCl<sub>3</sub>) δ 214.93, 139.08, 128.15, 127.99, 126.76, 73.75, 56.97, 42.28, 30.36, 27.33, 24.32.

# <sup>1</sup>H-NMR

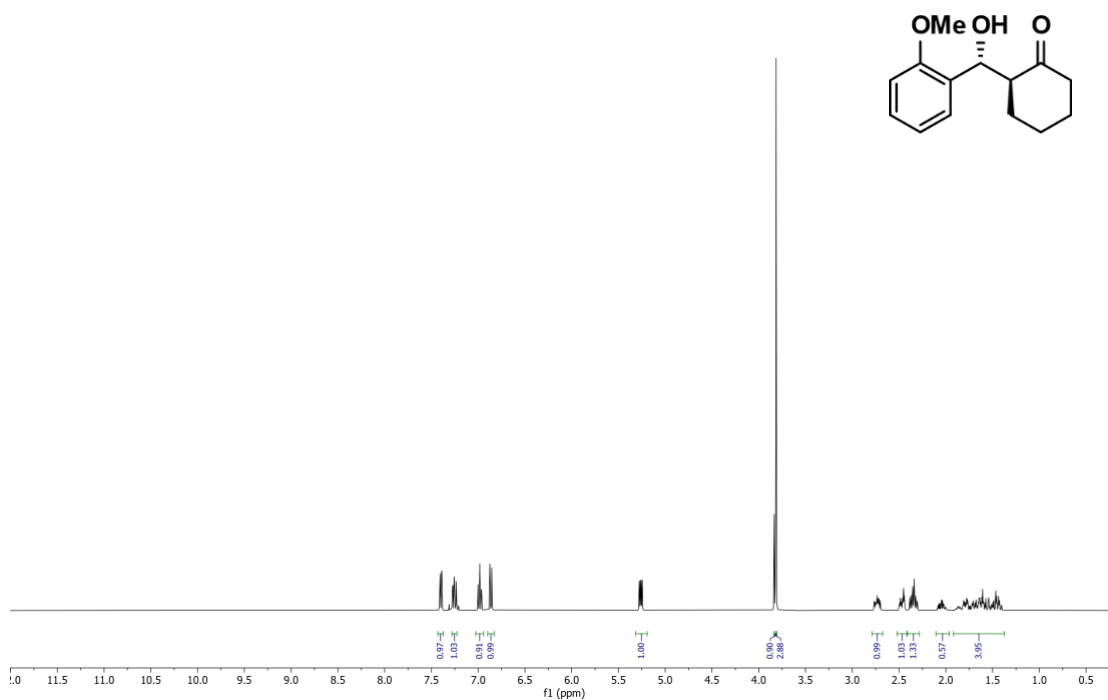

<sup>1</sup>H NMR (400 MHz, CDCl<sub>3</sub>) δ 7.40 (dd, *J* = 7.6, 1.8 Hz, 1H), 7.25 (ddd, *J* = 8.3, 7.4, 1.8 Hz, 1H), 6.98 (td, *J* = 7.5, 1.1 Hz, 1H), 6.86 (dd, *J* = 8.3, 1.1 Hz, 1H), 5.26 (dd, *J* = 8.5, 4.5 Hz, 1H), 3.83 (d, *J* = 4.5 Hz, 1H), 3.81 (s, 3H), 2.79 – 2.68 (m, 1H), 2.52 – 2.42 (m, 1H), 2.35 (dddd, *J* = 13.6, 12.4, 5.9, 1.3 Hz, 1H), 2.10 – 1.96 (m, 1H), 1.92 – 1.37 (m, 4H).

## C-NMR<sup>13</sup>

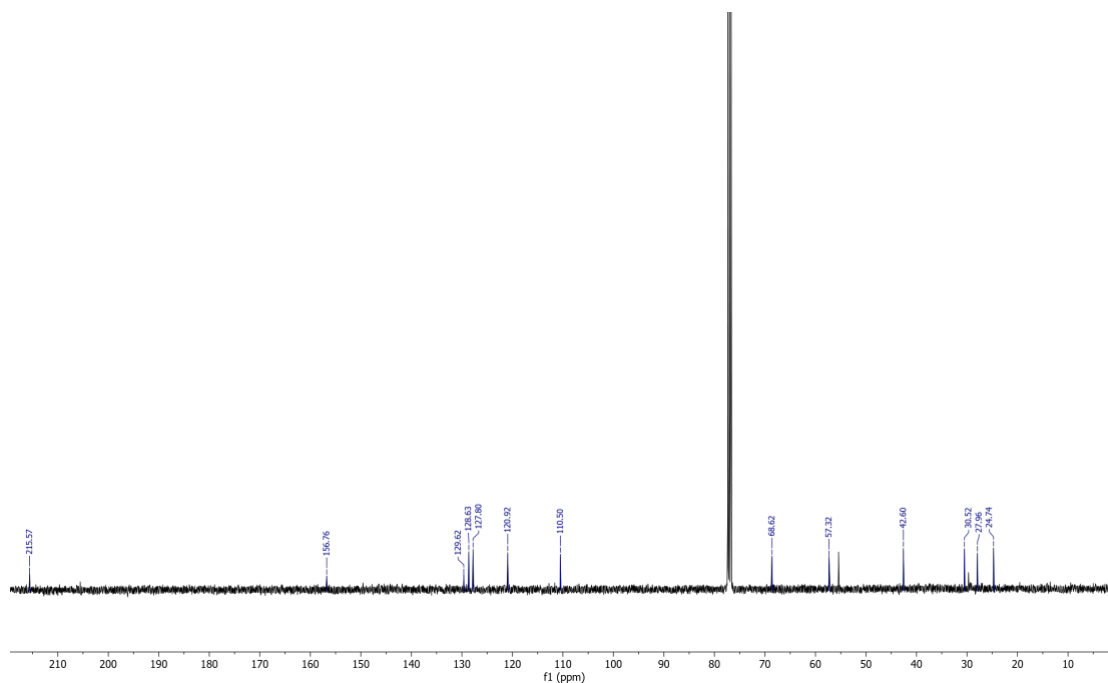

<sup>13</sup>C NMR (101 MHz, CDCl<sub>3</sub>) δ 215.57, 154.70, 129.62, 128.63, 127.80, 120.92, 110.50, 68.62, 57.32, 42.60, 30.52, 27.96, 24.74.

# <sup>1</sup>H-NMR

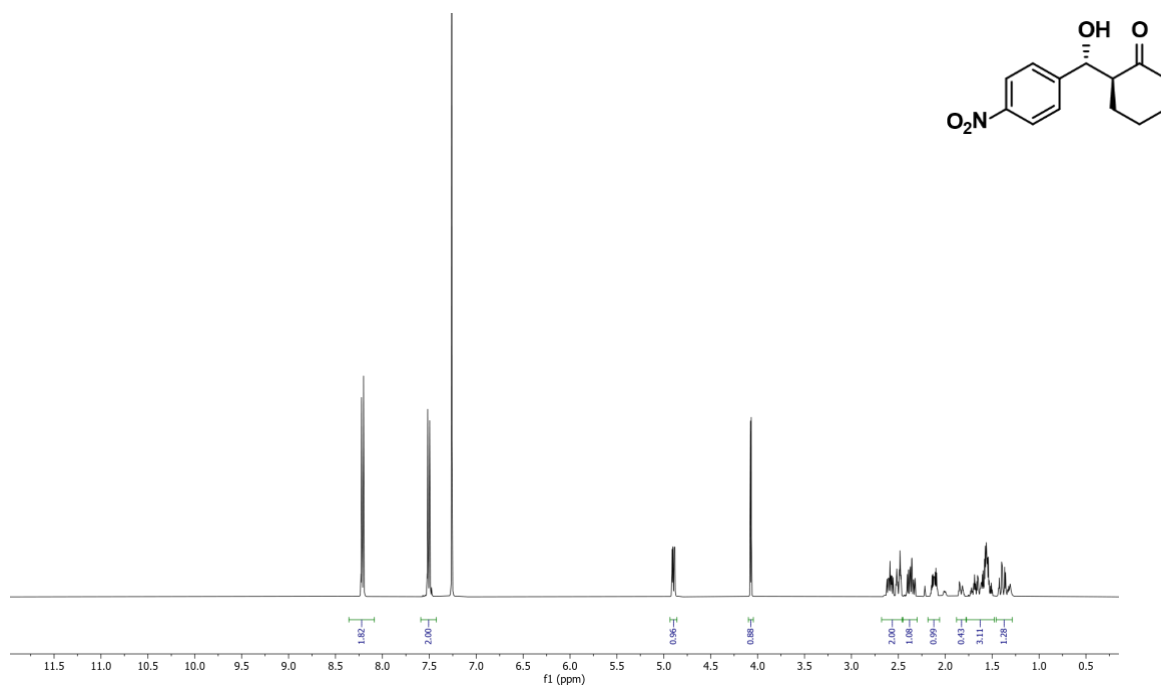

<sup>1</sup>H NMR (400 MHz, CDCl<sub>3</sub>) δ 8.36 – 8.09 (m, 2H), 7.59 – 7.42 (m, 2H), 4.90 (dd, *J* = 8.4, 3.1 Hz, 1H), 4.07 (d, *J* = 3.2 Hz, 1H), 2.68 – 2.45 (m, 2H), 2.36 (tdd, *J* = 13.6, 6.1, 1.2 Hz, 1H), 2.12 (ddt, *J* = 12.1, 5.8, 2.8 Hz, 1H), 1.88 – 1.77 (m, 1H), 1.78 – 1.48 (m, 3H), 1.46 – 1.29 (m, 1H).

# C-NMR<sup>13</sup>

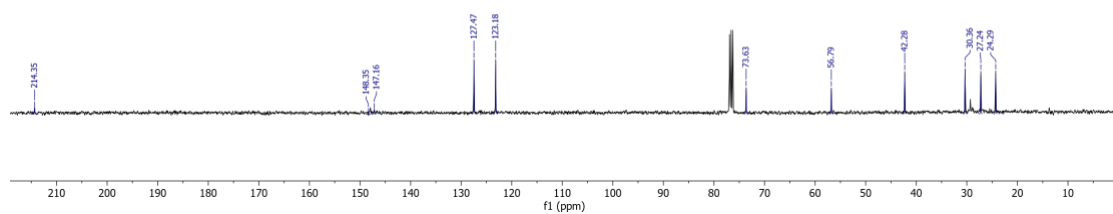

<sup>13</sup>C NMR (101 MHz, CDCl<sub>3</sub>) δ 214.35, 148.35, 147.16, 127.47, 123.18, 73.63, 56.79, 42.28, 30.36, 27.24, 24.29.



## $^1\text{H}$ -NMR

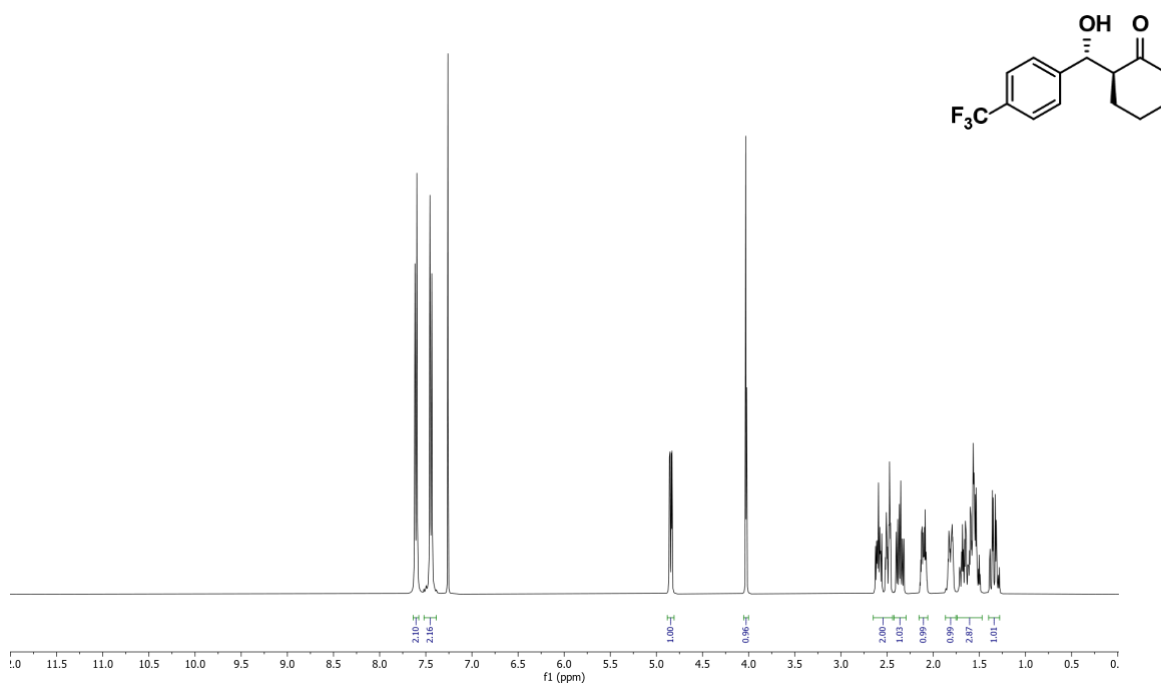

## $^{13}\text{C}$ -NMR<sup>13</sup>

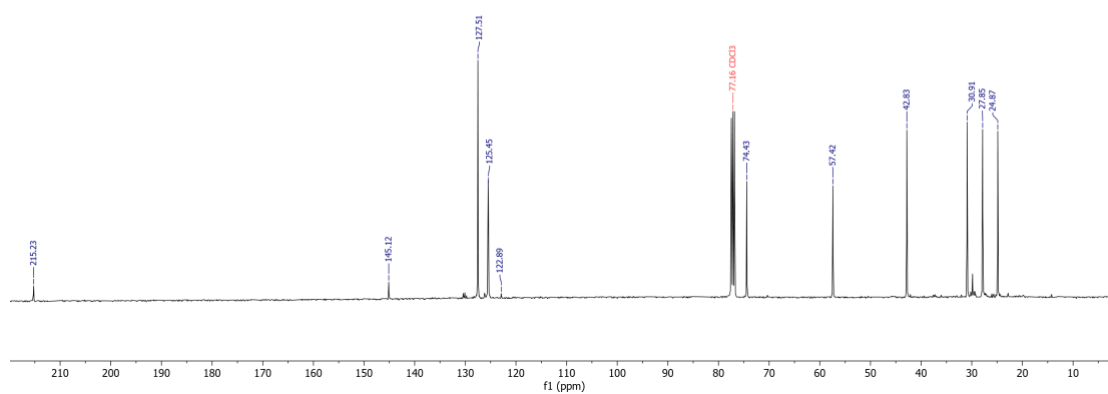

# <sup>1</sup>H-NMR

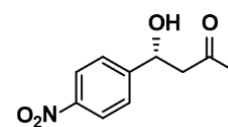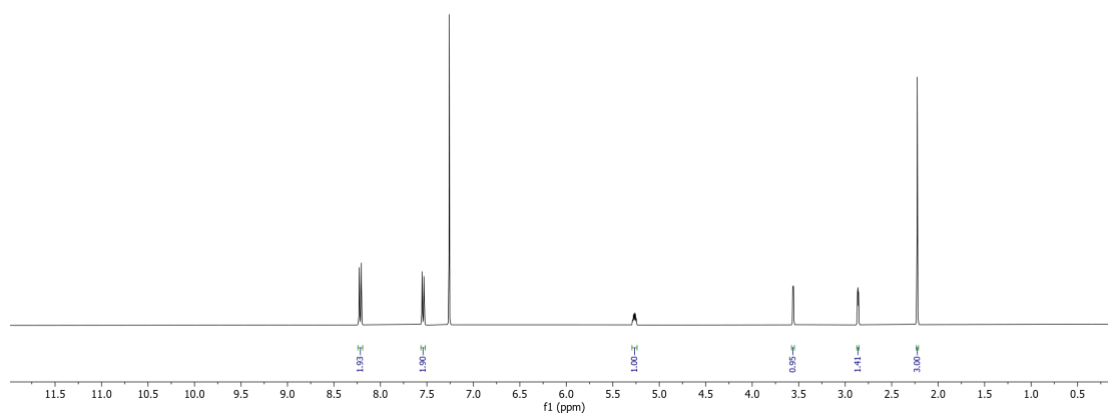

<sup>1</sup>H NMR (400 MHz, CDCl<sub>3</sub>) δ 8.24 – 8.19 (m, 2H), 7.56 – 7.52 (m, 2H), 5.27 (dt, *J* = 7.7, 3.7 Hz, 1H), 3.56 (d, *J* = 3.3 Hz, 1H), 2.88 – 2.85 (m, 1H), 2.22 (s, 3H).

## C-NMR<sup>13</sup>

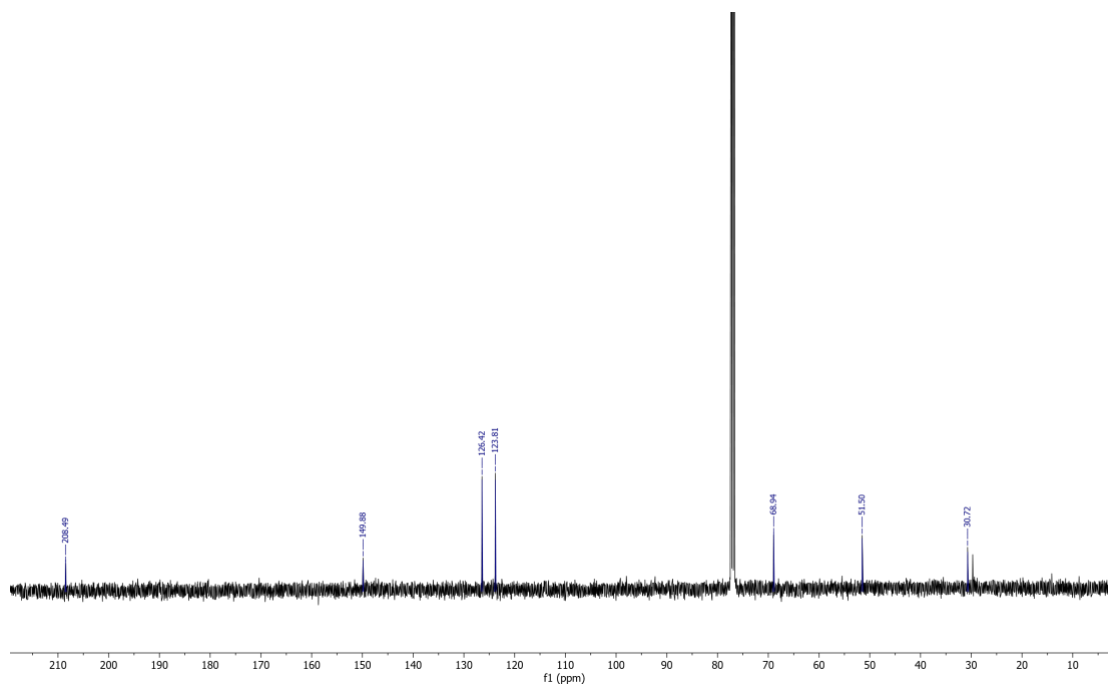

<sup>13</sup>C NMR (101 MHz, CDCl<sub>3</sub>) δ 208.49, 149.88, 126.42, 123.81, 68.94, 51.50, 30.72.

# <sup>1</sup>H-NMR

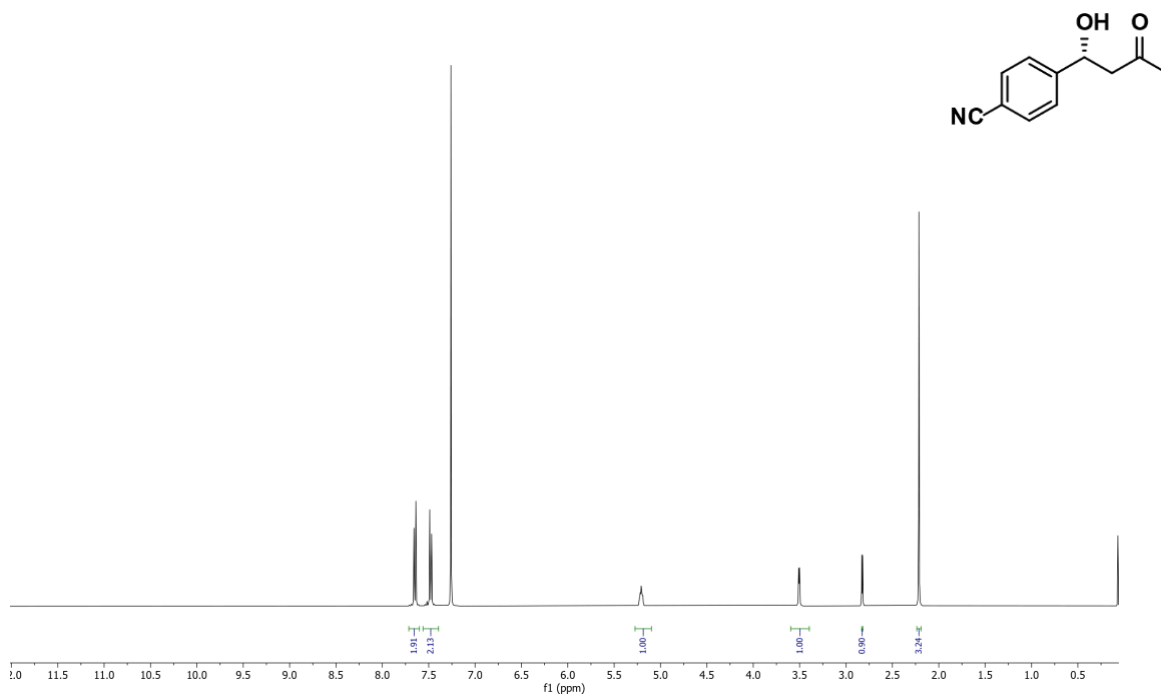

# <sup>13</sup>C-NMR

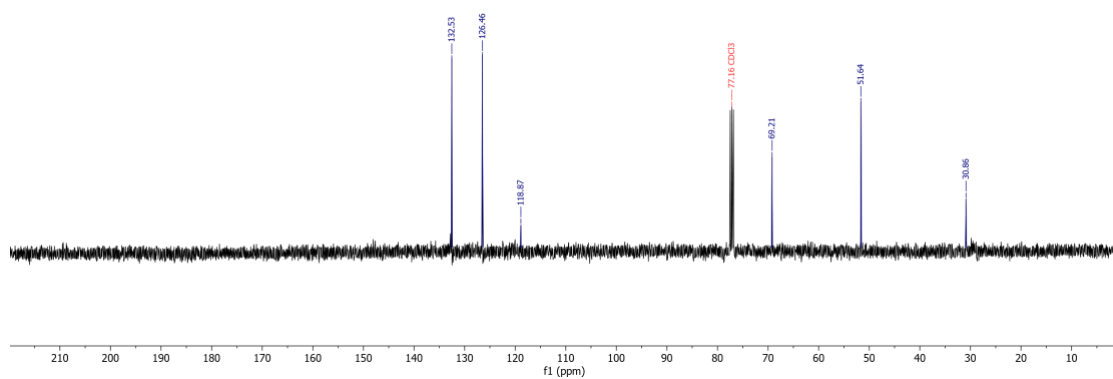

# <sup>1</sup>H-NMR

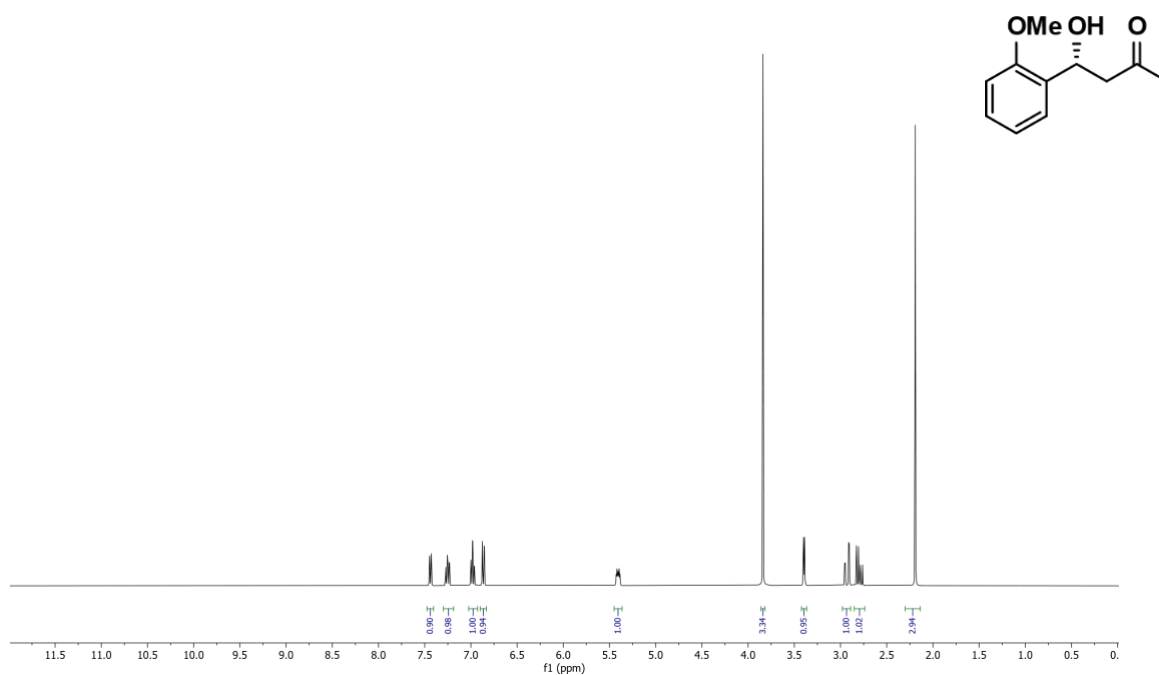

<sup>1</sup>H NMR (400 MHz, CDCl<sub>3</sub>) δ 7.44 (ddd, *J* = 7.6, 1.8, 0.7 Hz, 1H), 7.25 (ddd, *J* = 8.2, 7.4, 1.8 Hz, 1H), 6.98 (td, *J* = 7.5, 1.1 Hz, 1H), 6.87 (dd, *J* = 8.2, 1.1 Hz, 1H), 5.41 (dt, *J* = 9.3, 3.7 Hz, 1H), 3.84 (s, 3H), 3.39 (d, *J* = 4.5 Hz, 1H), 2.98 – 2.89 (m, 1H), 2.85 – 2.74 (m, 1H), 2.19 (s, 3H).

# <sup>13</sup>C-NMR

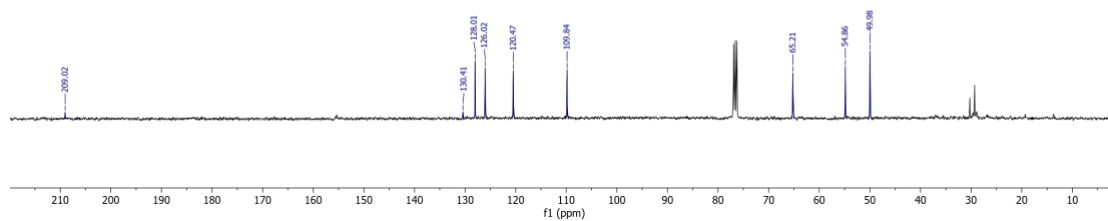

<sup>13</sup>C NMR (101 MHz, CDCl<sub>3</sub>) δ 209.02, 130.41, 128.01, 126.02, 120.47, 109.84, 65.21, 54.86, 49.98.

In CDCl<sub>3</sub> - <sup>1</sup>H-NMR

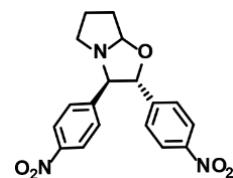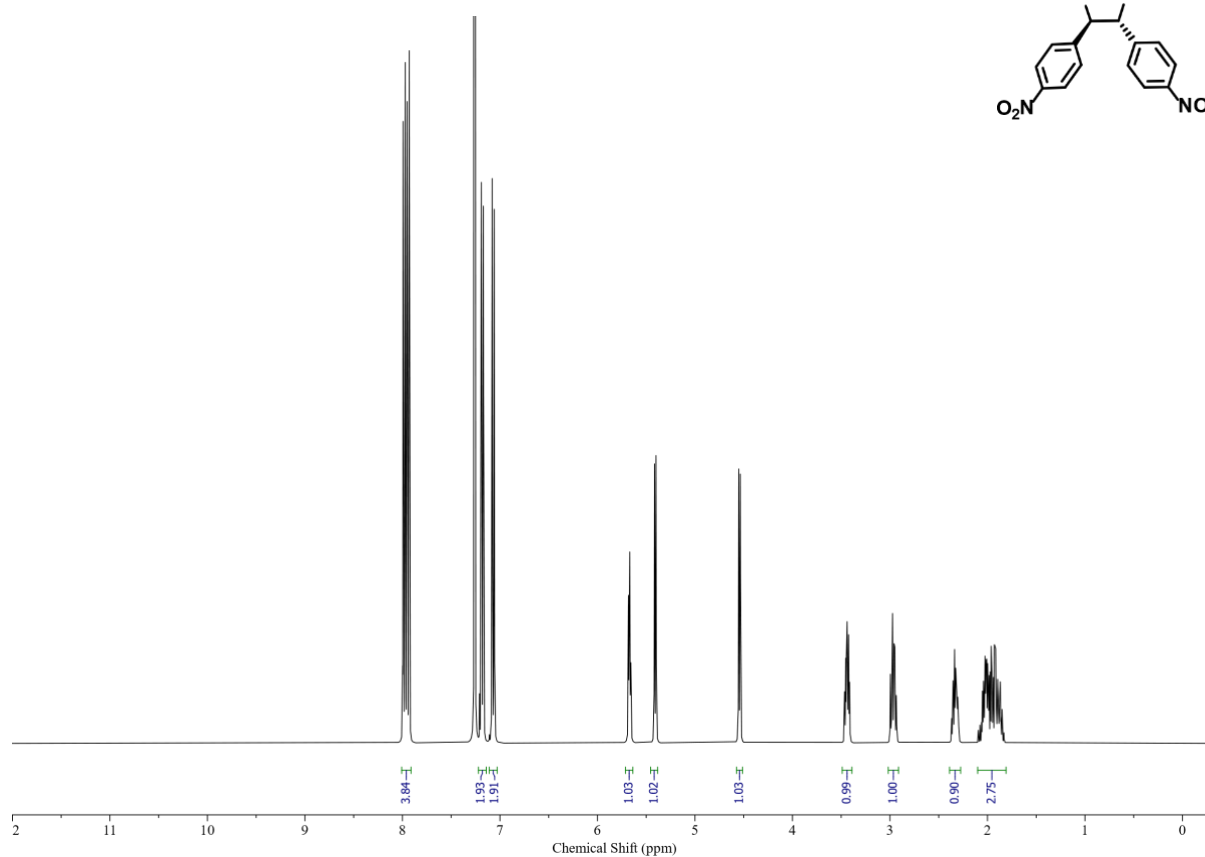

<sup>1</sup>H NMR (400 MHz, CDCl<sub>3</sub>) δ 8.23 – 8.16 (m, 4H), 7.47 – 7.32 (m, 4H), 5.34 (dd, *J* = 4.7, 2.2 Hz, 1H), 4.69 (d, *J* = 7.9 Hz, 1H), 3.84 (d, *J* = 7.9 Hz, 1H), 3.16 (dt, *J* = 10.3, 6.5 Hz, 1H), 2.85 (dt, *J* = 10.3, 6.3 Hz, 1H), 2.28 – 2.16 (m, 2H), 2.14 – 2.07 (m, 1H), 1.91 (dtd, *J* = 12.3, 6.1, 1.1 Hz, 1H).

C-NMR<sup>13</sup>

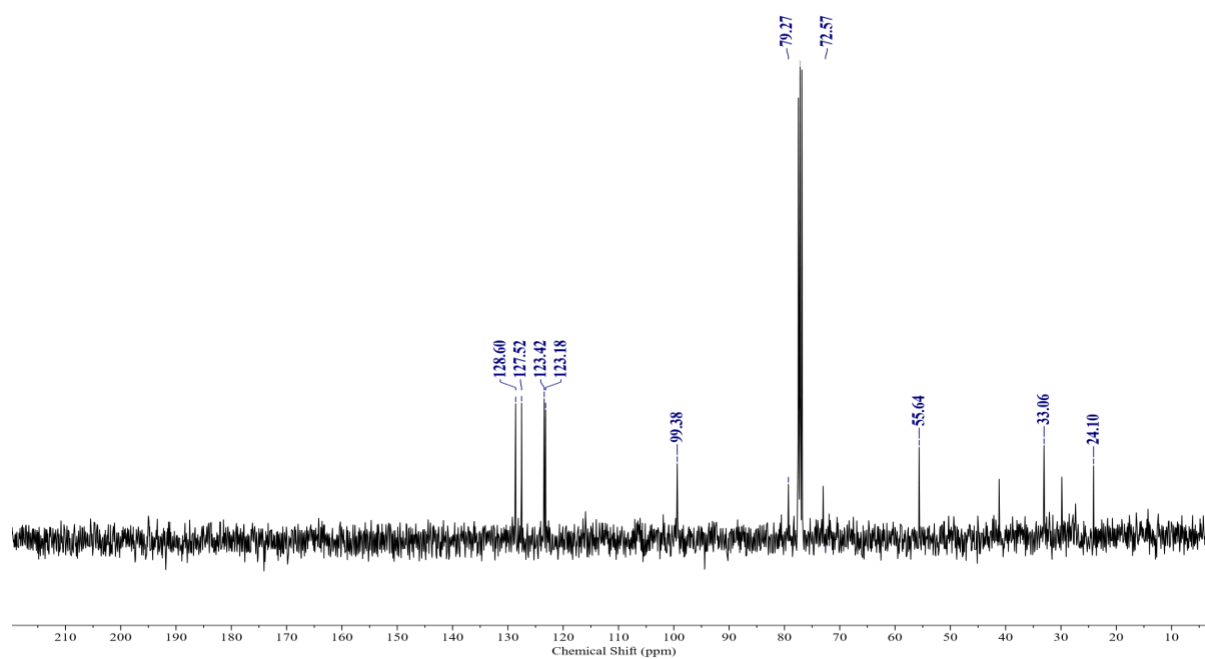

<sup>13</sup>C NMR (101 MHz, CDCl<sub>3</sub>) δ 128.15, 127.21, 124.11, 124.05, 99.48, 87.59, 78.64, 56.02, 31.72, 24.24.

In DMSO-d<sub>6</sub> - <sup>1</sup>H-NMR

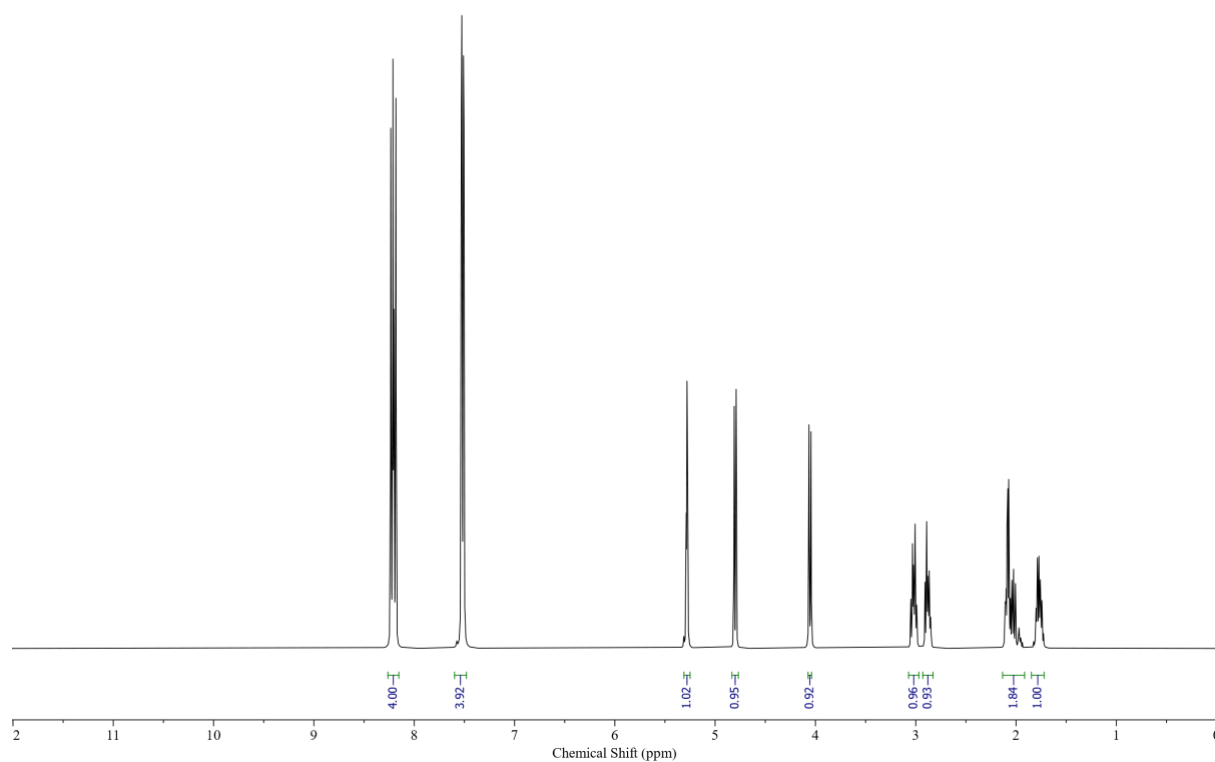

<sup>1</sup>H NMR (400 MHz, DMSO)  $\delta$  8.26 – 8.15 (m, 4H), 7.60 – 7.48 (m, 4H), 5.28 (t,  $J$  = 3.2 Hz, 1H), 4.80 (d,  $J$  = 7.9 Hz, 1H), 4.05 (d,  $J$  = 7.9 Hz, 1H), 3.02 (dt,  $J$  = 10.2, 6.4 Hz, 1H), 2.88 (dt,  $J$  = 10.0, 6.1 Hz, 1H), 2.13 – 1.91 (m, 2H), 1.77 (dt,  $J$  = 11.9, 5.9 Hz, 1H).

In CDCl<sub>3</sub> - <sup>1</sup>H-NMR

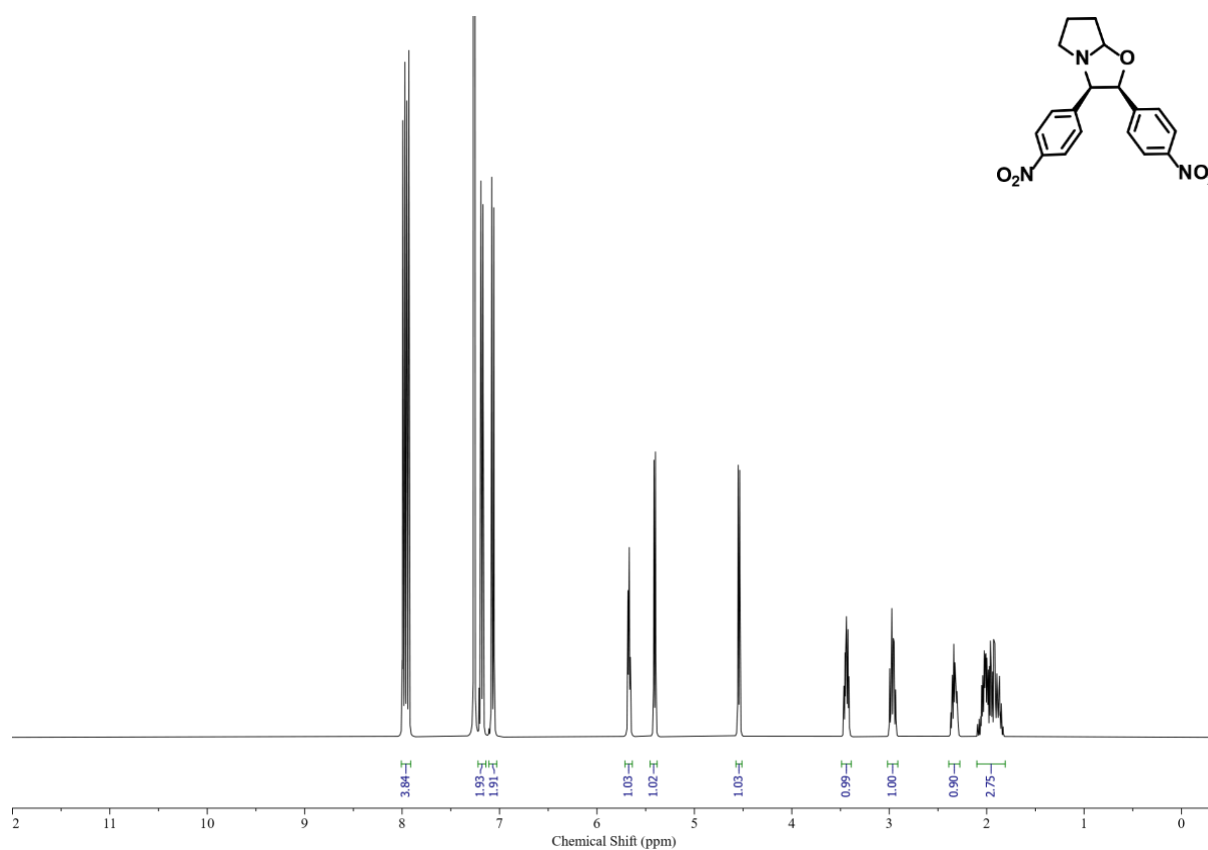

C-NMR<sup>13</sup>

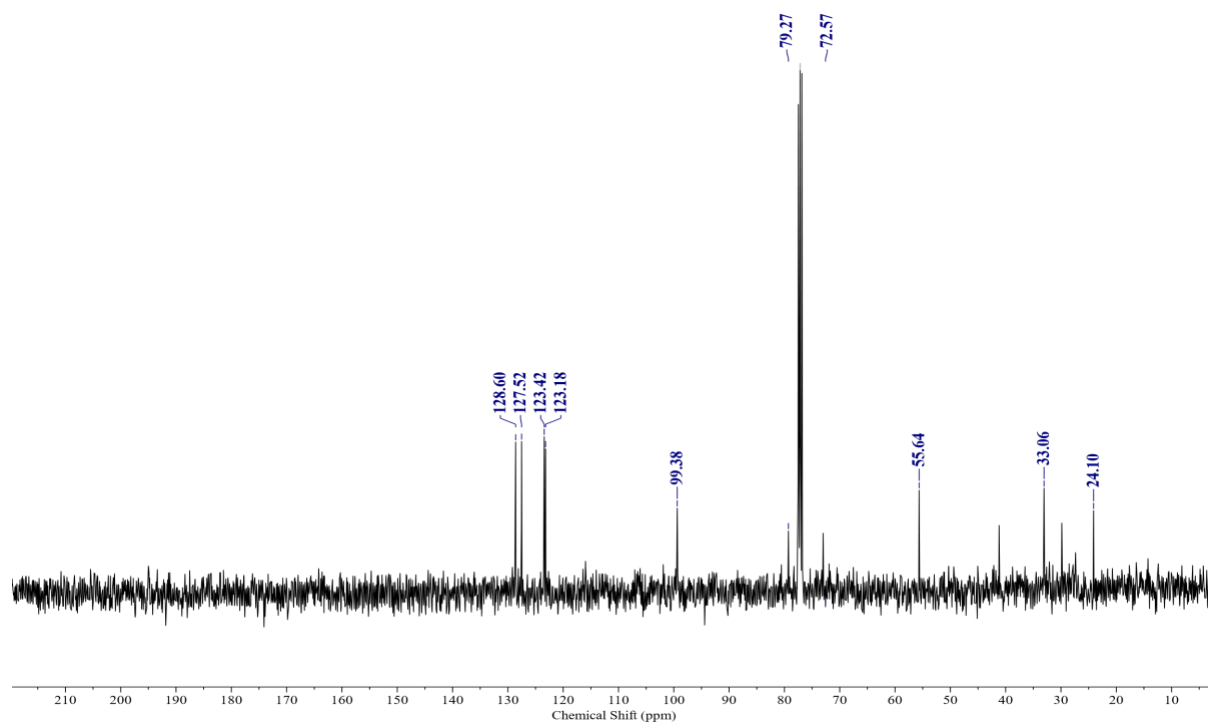

<sup>13</sup>C NMR (101 MHz, CDCl<sub>3</sub>) δ 128.60, 127.52, 123.42, 123.18, 99.38, 79.27, 72.57, 55.64, 33.06, 24.10.

In DMSO-d<sub>6</sub> - <sup>1</sup>H-NMR

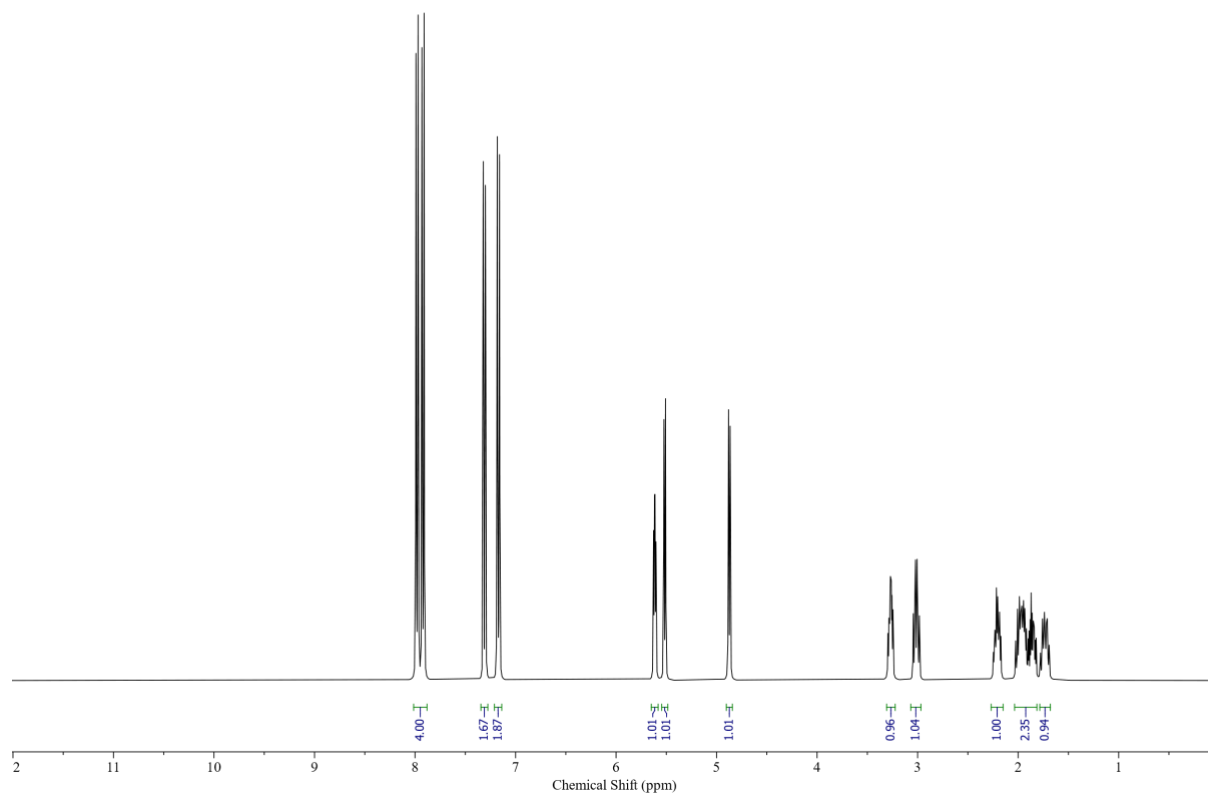

<sup>1</sup>H NMR (400 MHz, DMSO)  $\delta$  8.01 – 7.88 (m, 4H), 7.34 – 7.28 (m, 2H), 7.21 – 7.14 (m, 2H), 5.62 (dd,  $J$  = 5.6, 3.6 Hz, 1H), 5.52 (d,  $J$  = 6.2 Hz, 1H), 4.87 (d,  $J$  = 6.2 Hz, 1H), 3.31 – 3.22 (m, 1H), 3.01 (td,  $J$  = 9.0, 6.2 Hz, 1H), 2.27 – 2.15 (m, 1H), 2.04 – 1.81 (m, 2H), 1.78 – 1.68 (m, 1H).

NMRs in agreement to the literature.<sup>3-9</sup>



$^1\text{H}$ -NMR

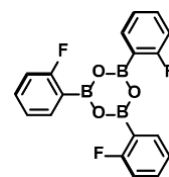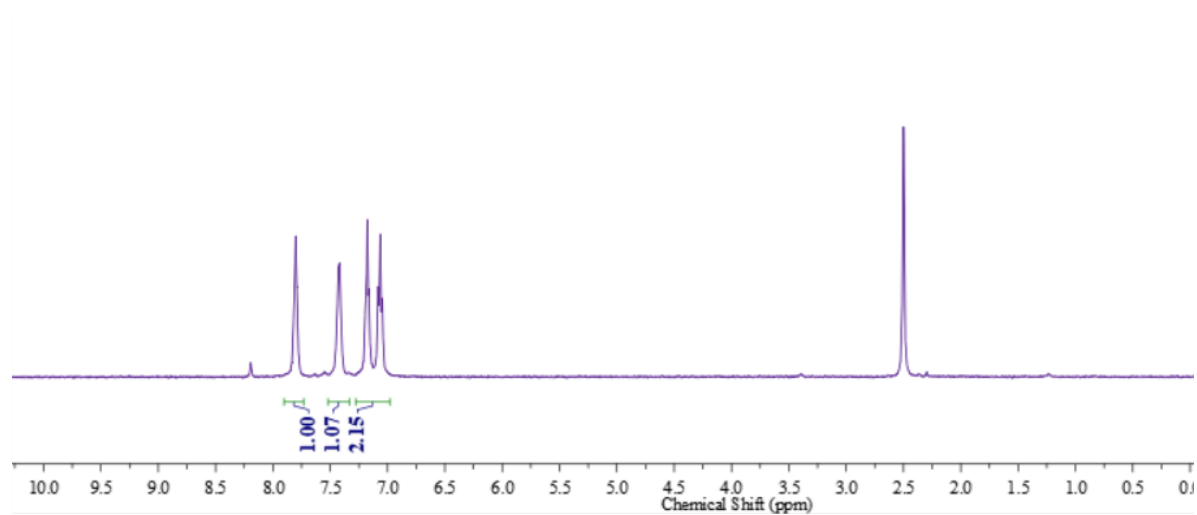

## 18. Crude NMR spectra

18.1 Scope (table S6 and S7)

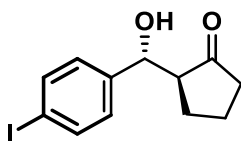

~1:1 Syn:Anti (racemic)

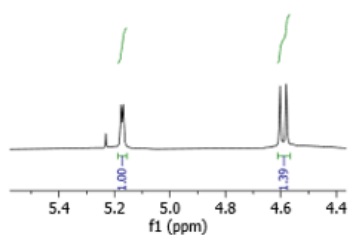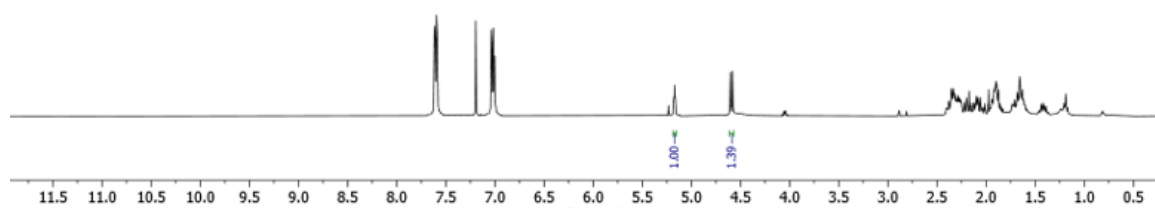

Crude (chiral sample)

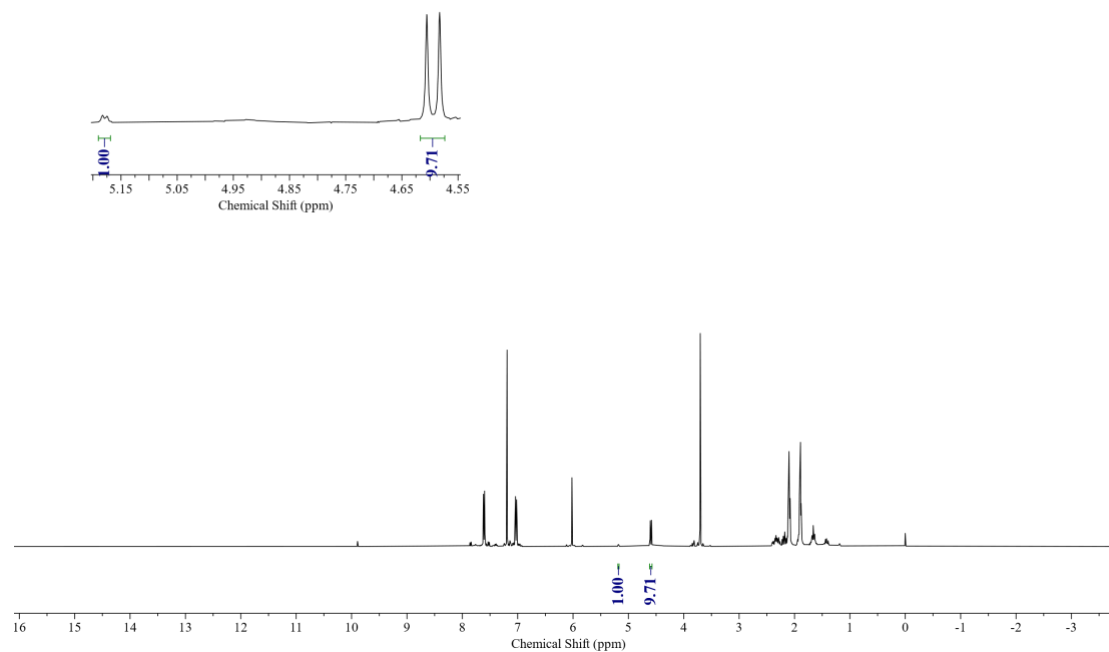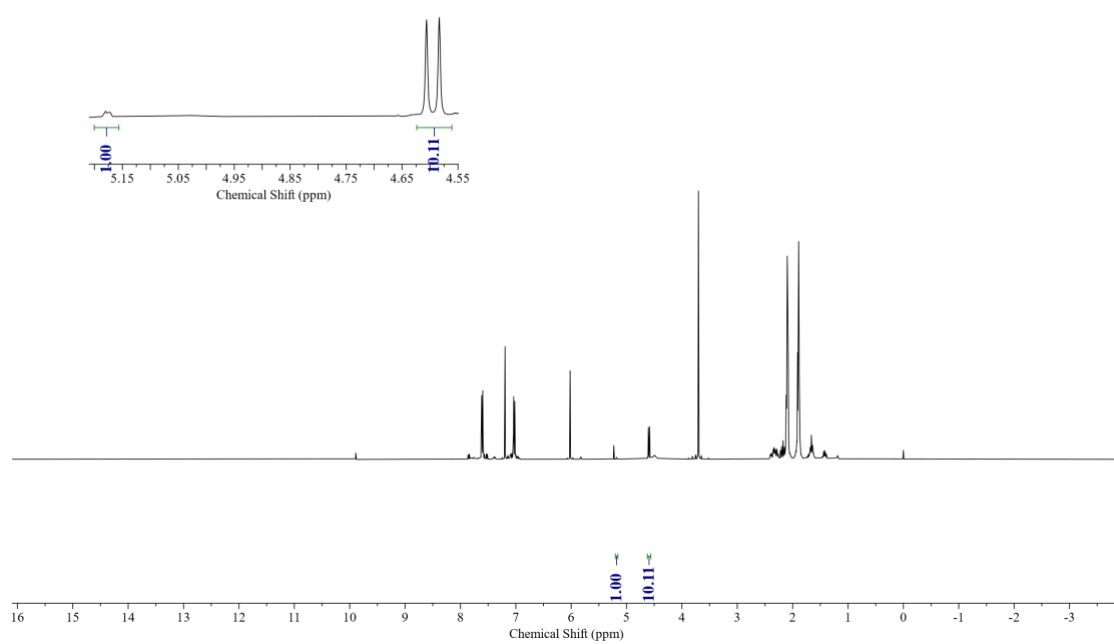

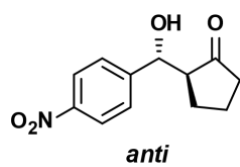

Syn:Anti ~ 1:1 (racemic)

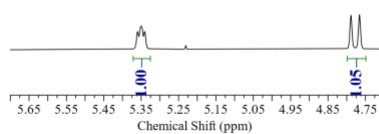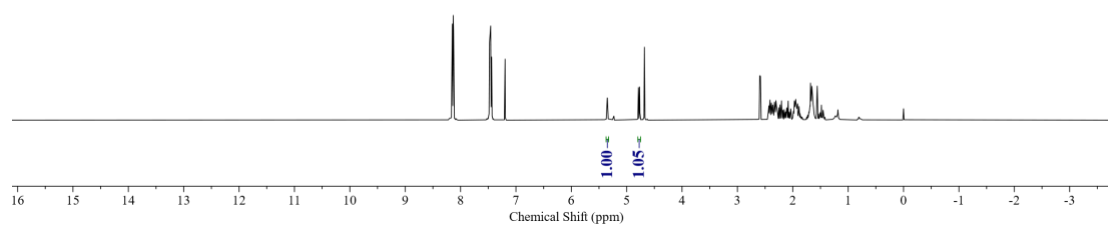

Crude (chiral sample)

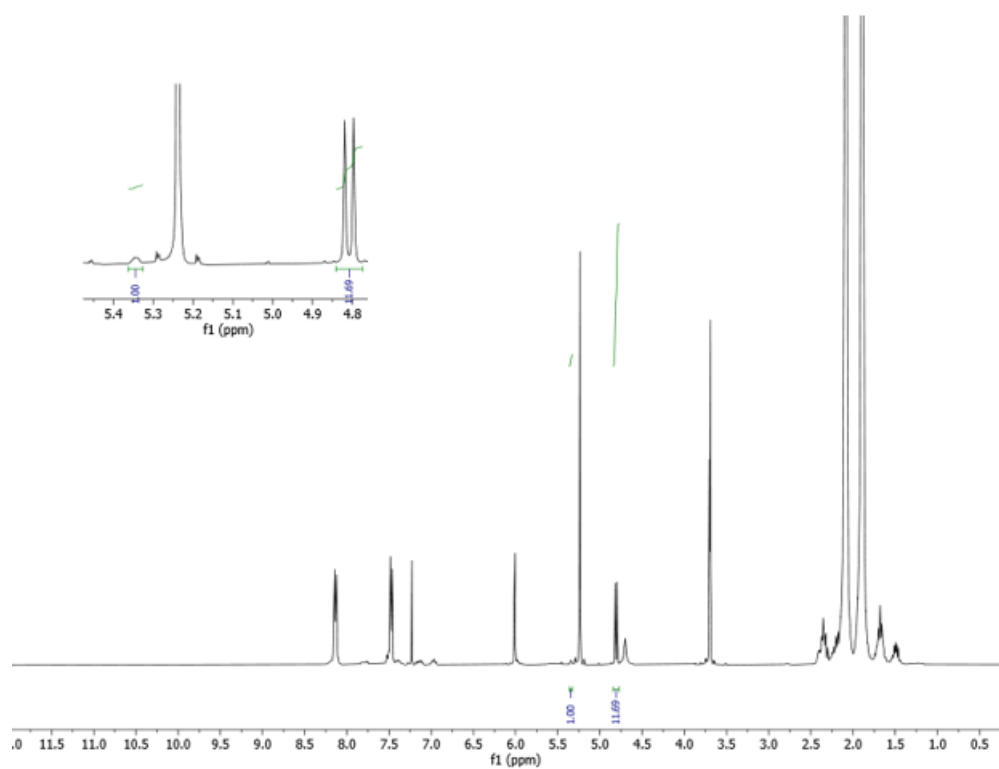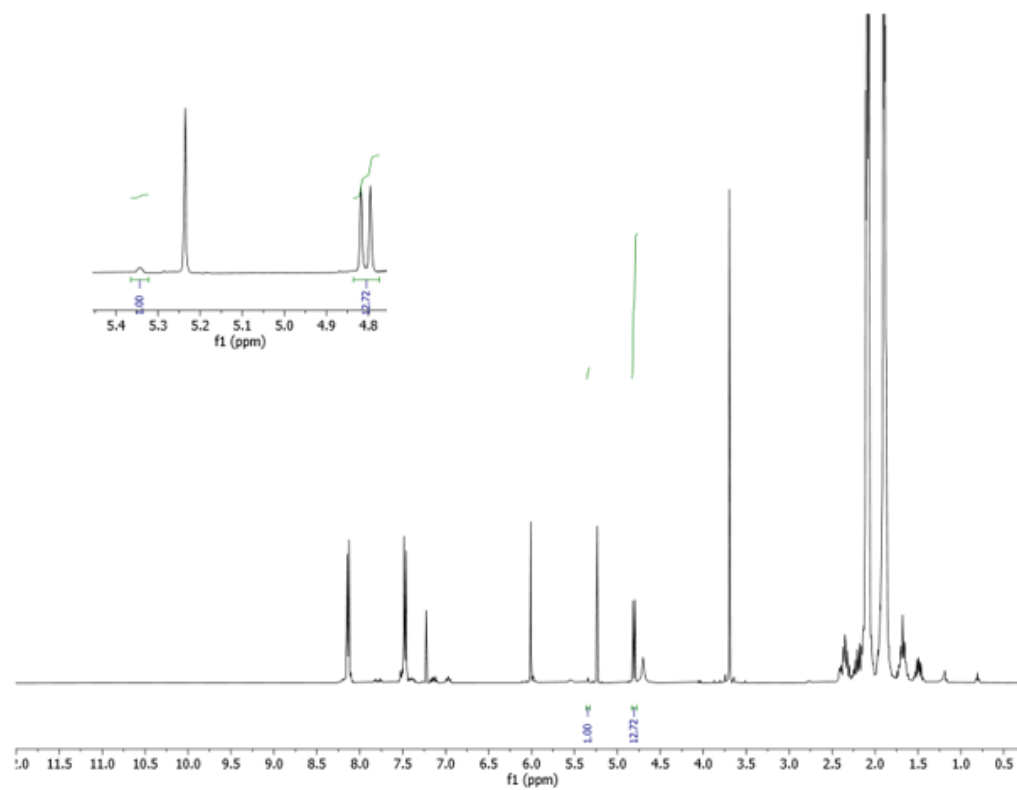

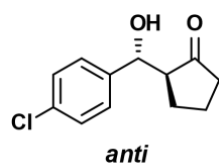

1:1 Syn:Anti~(racemic)

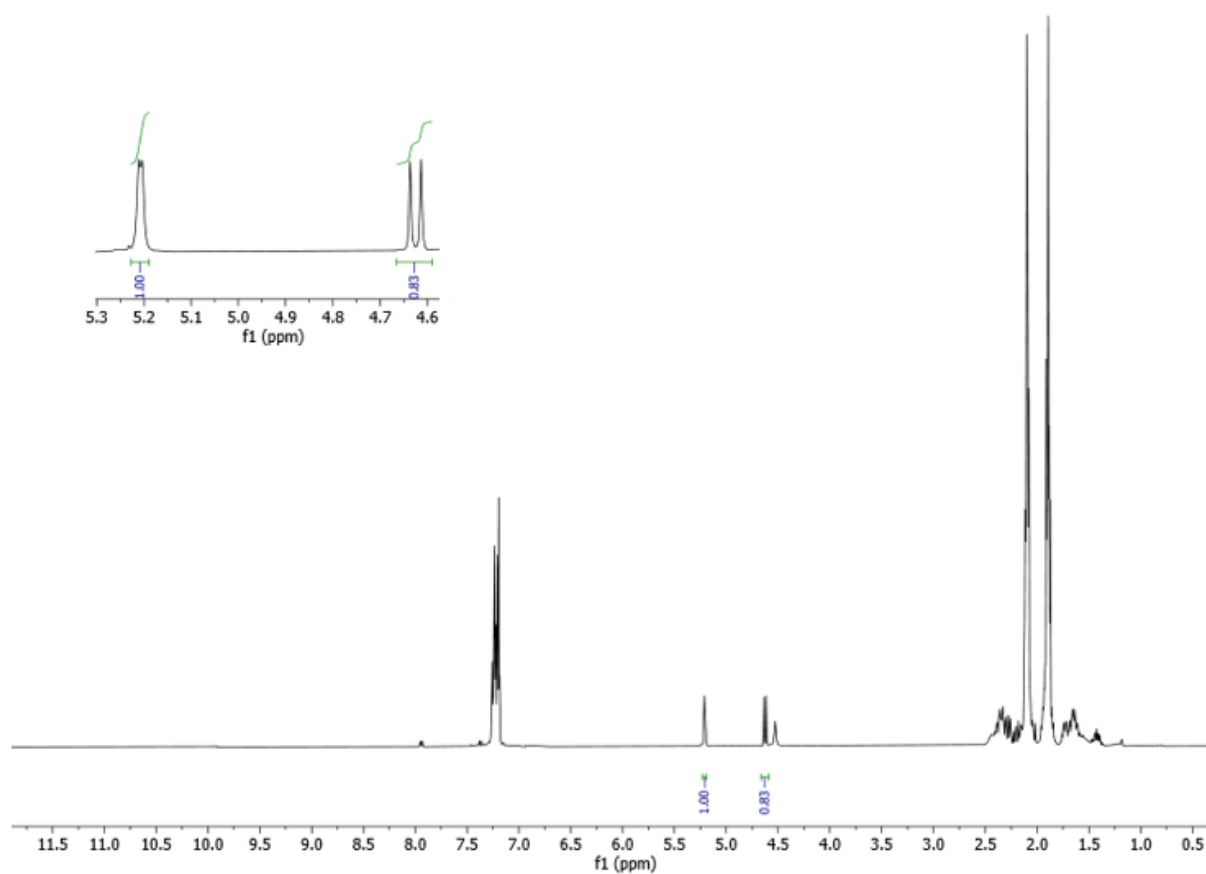

Crude NMR (chiral sample)

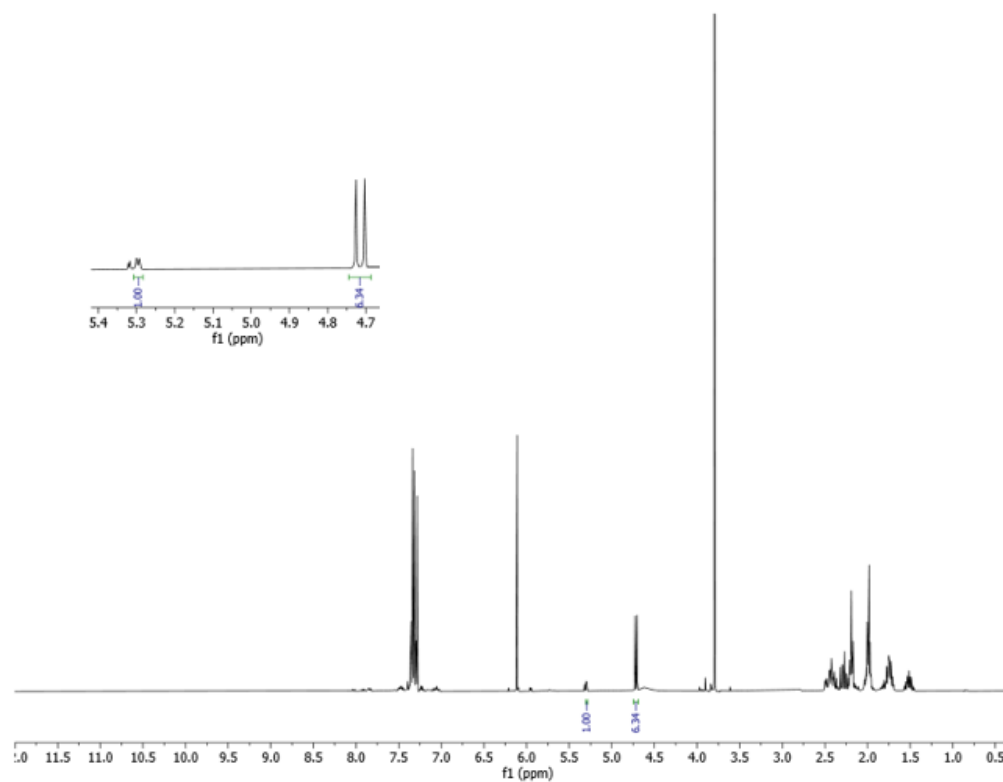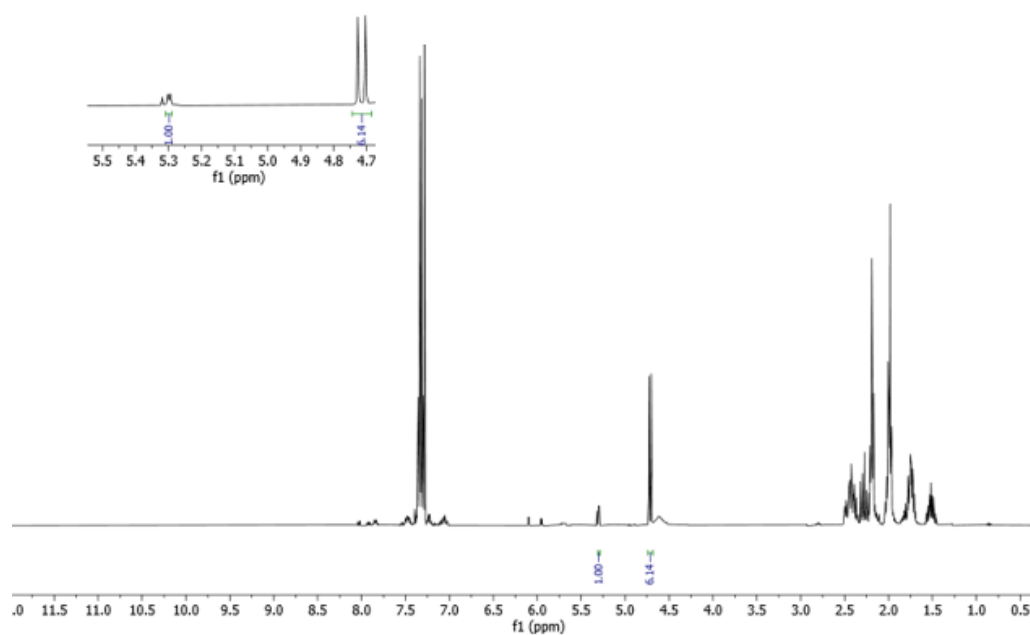

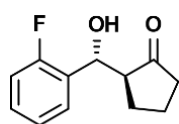

*anti*

1:1 Syn:Anti~ (racemic)

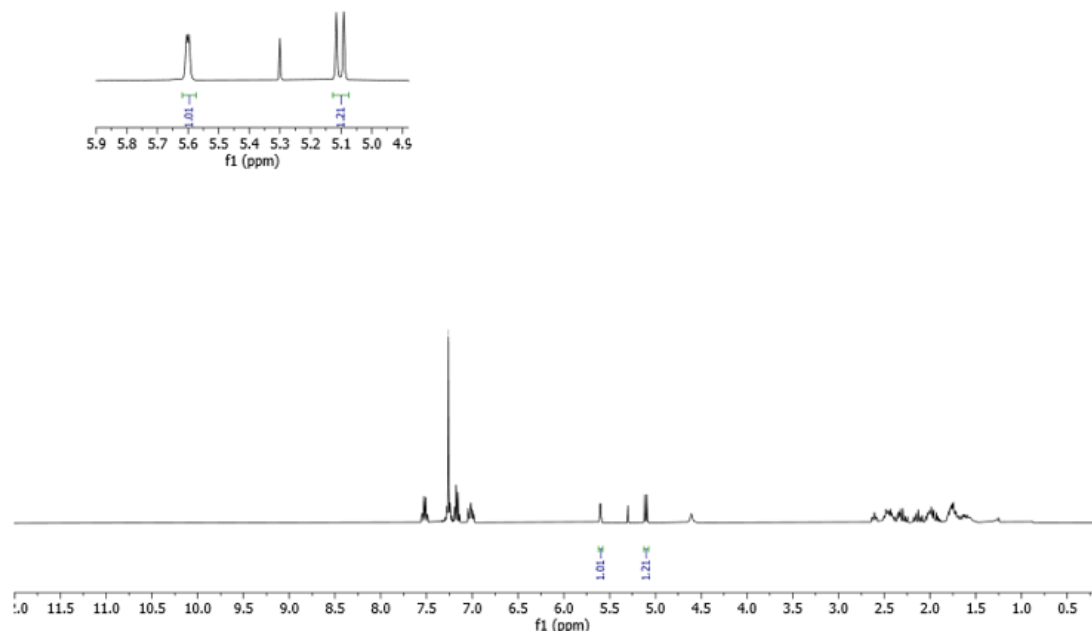



Crude NMR (chiral sample)

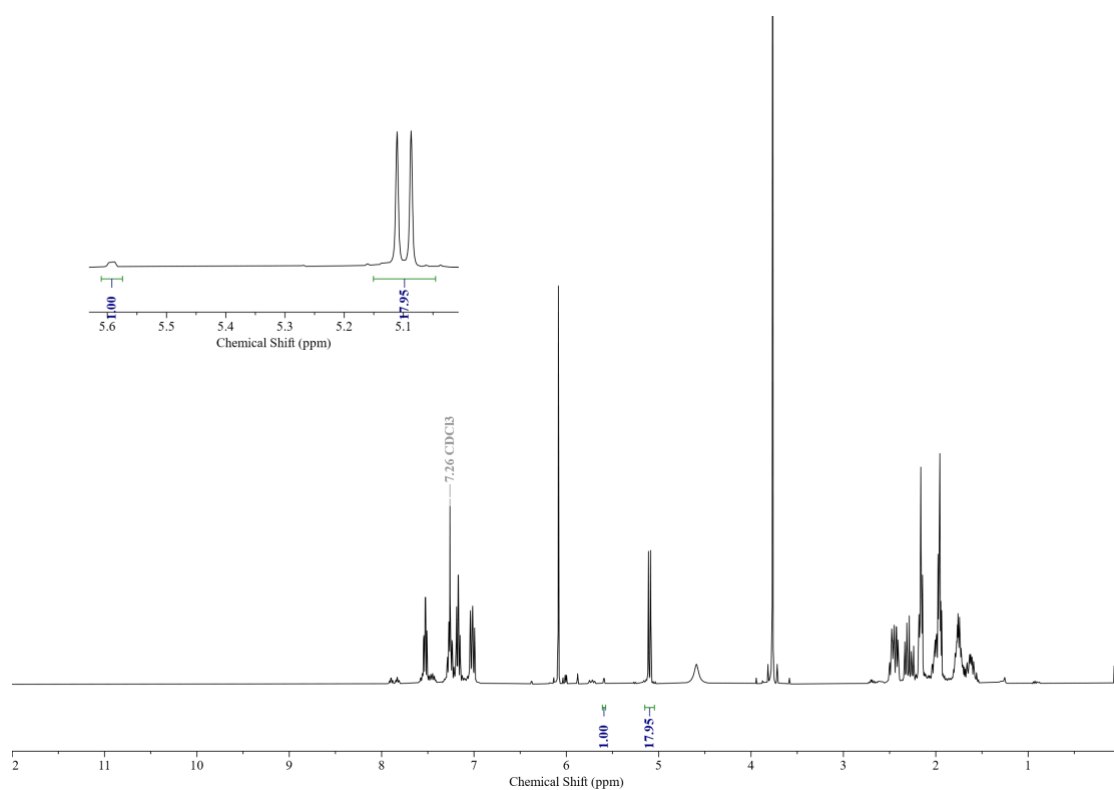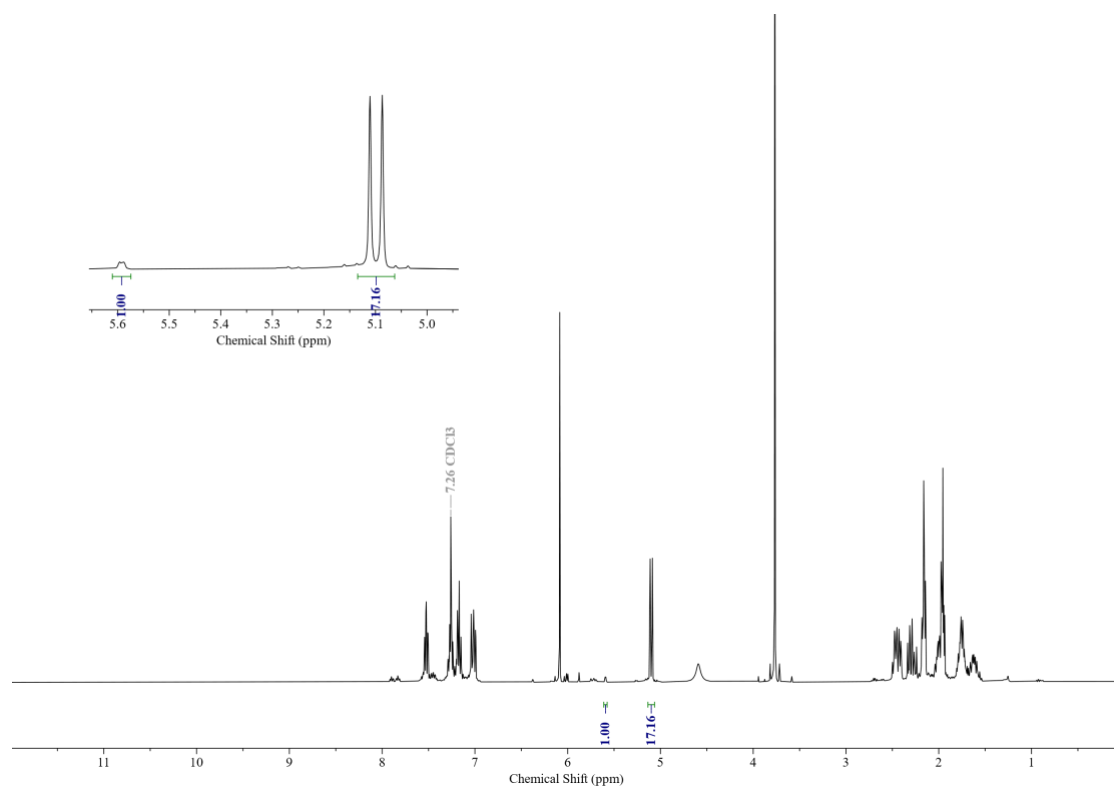

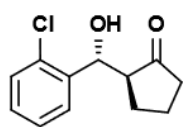

**anti**

1:1 Syn:Anti~ (racemic)

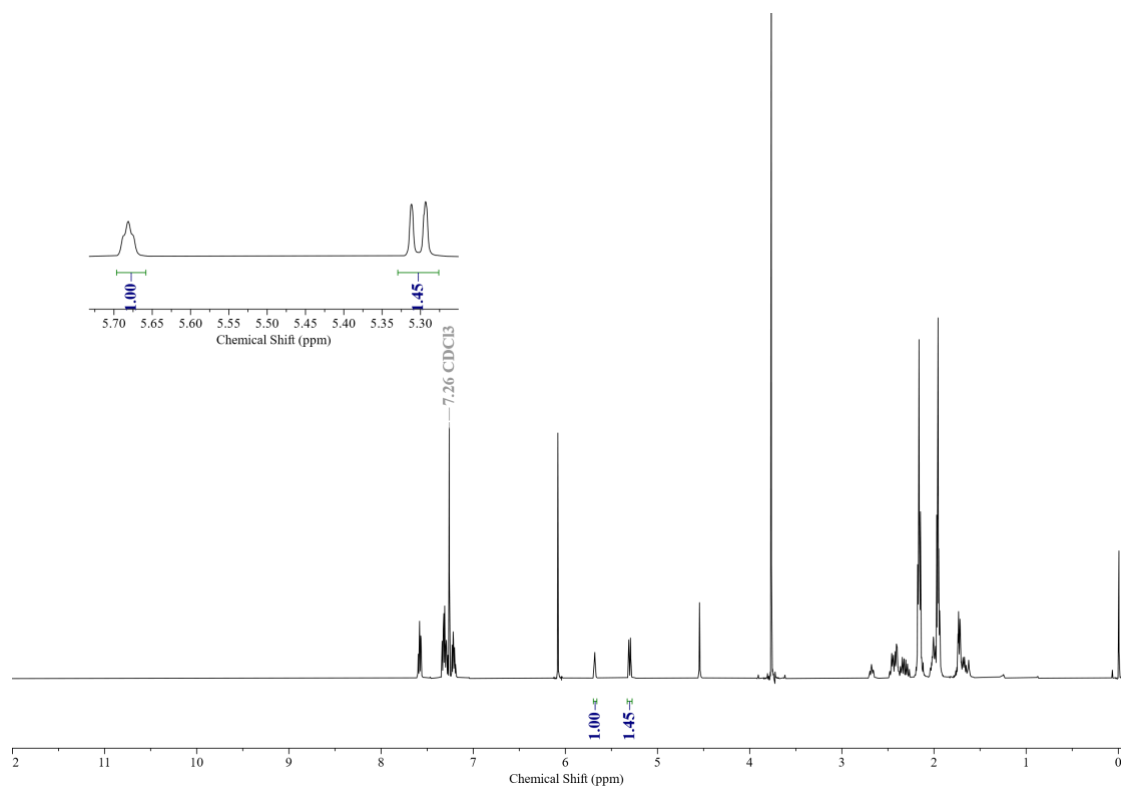

# Crude NMR (chiral sample)

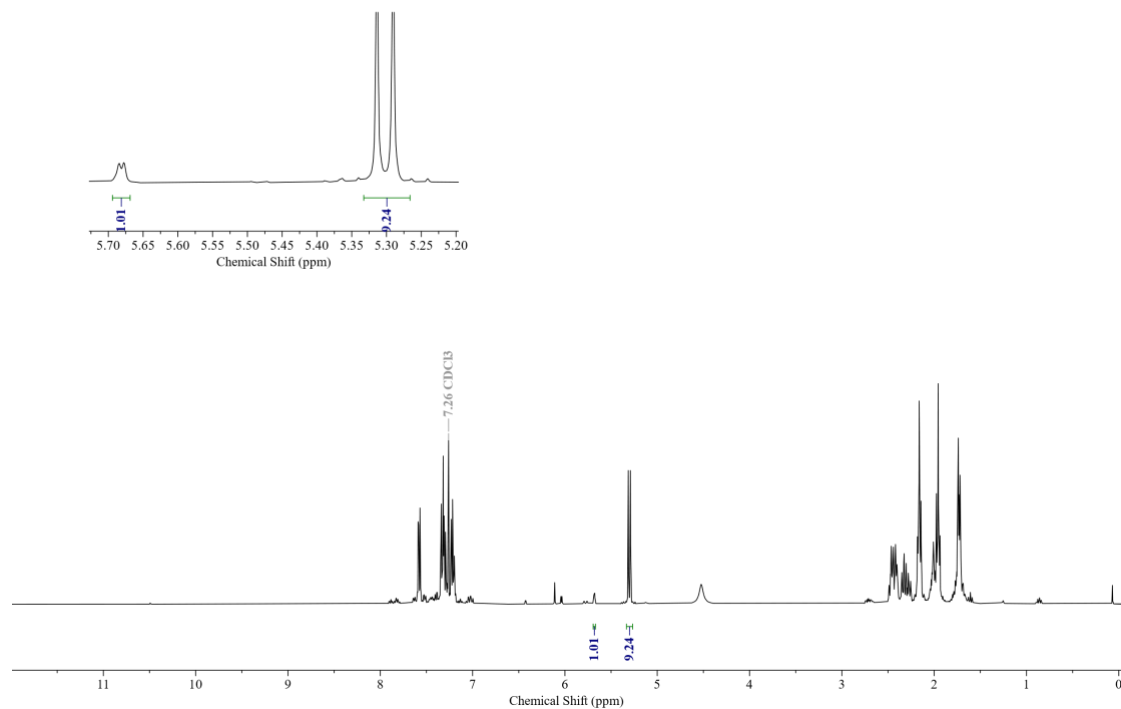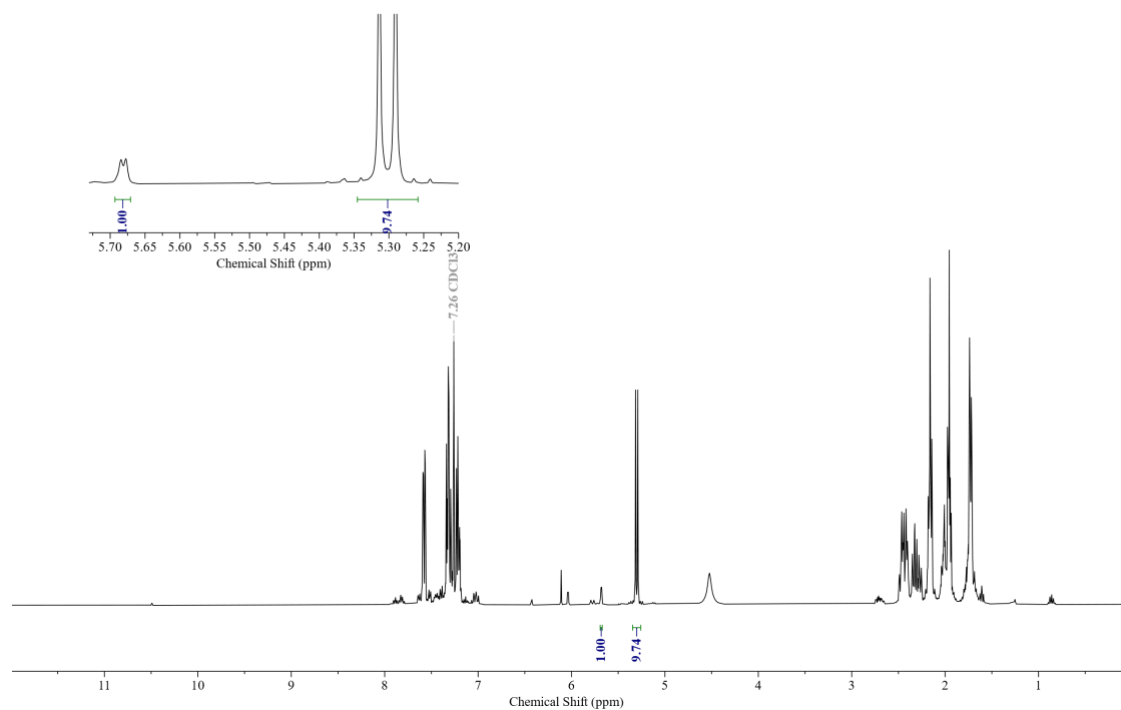

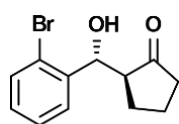

*anti*

~1:1 anti : syn (racemic)

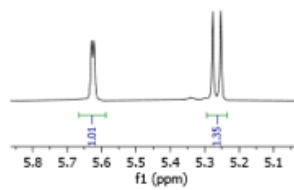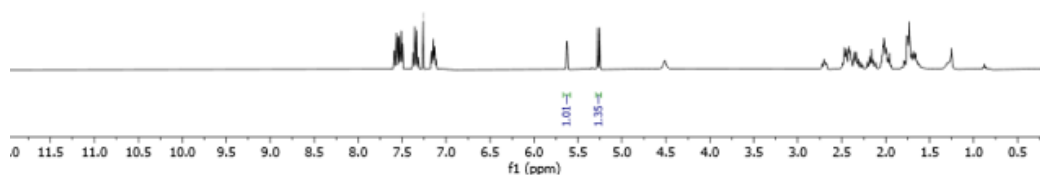

Crude nmr (chiral sample)

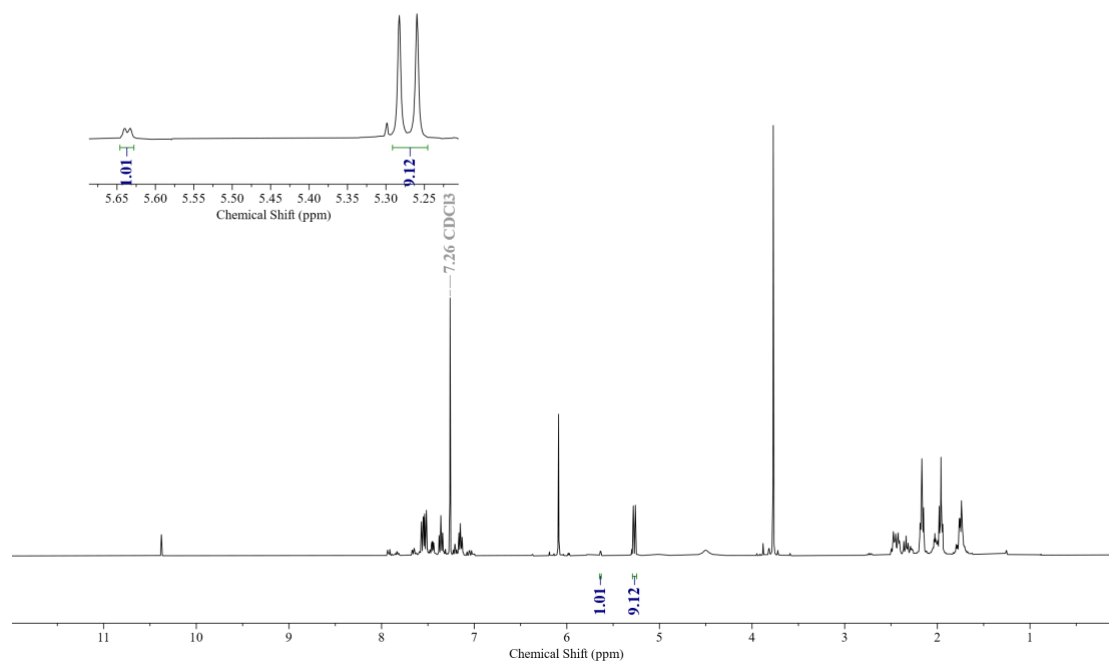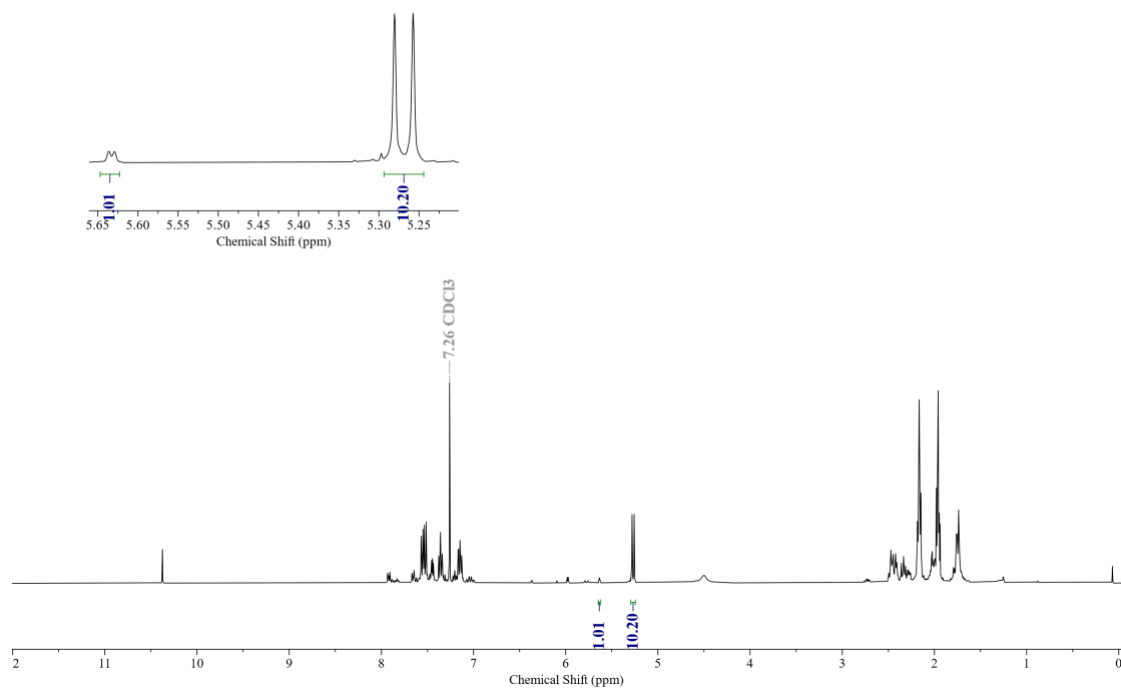

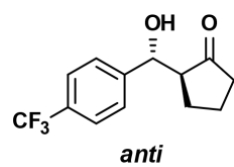

~1:1 anti : syn (racemic)

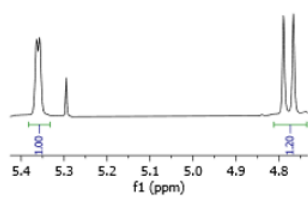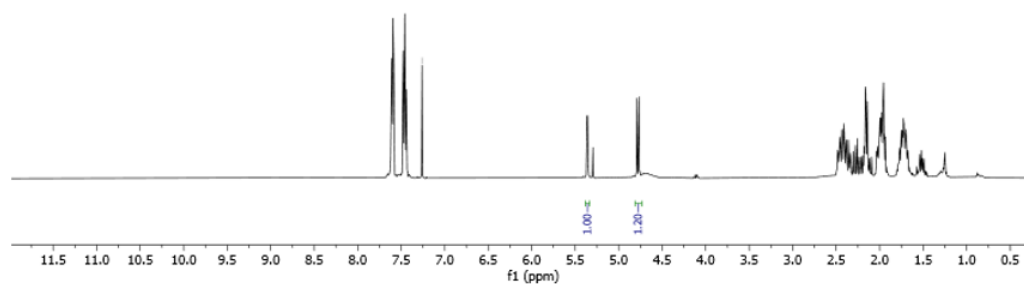

Crude (chiral sample)

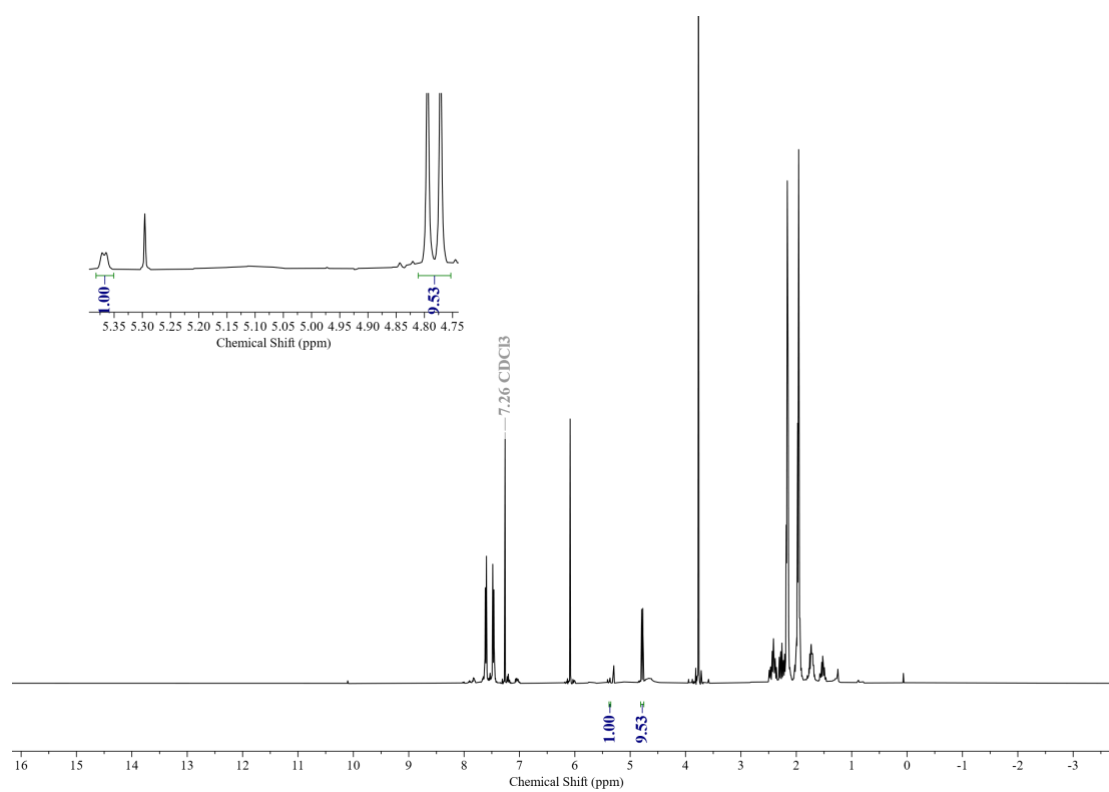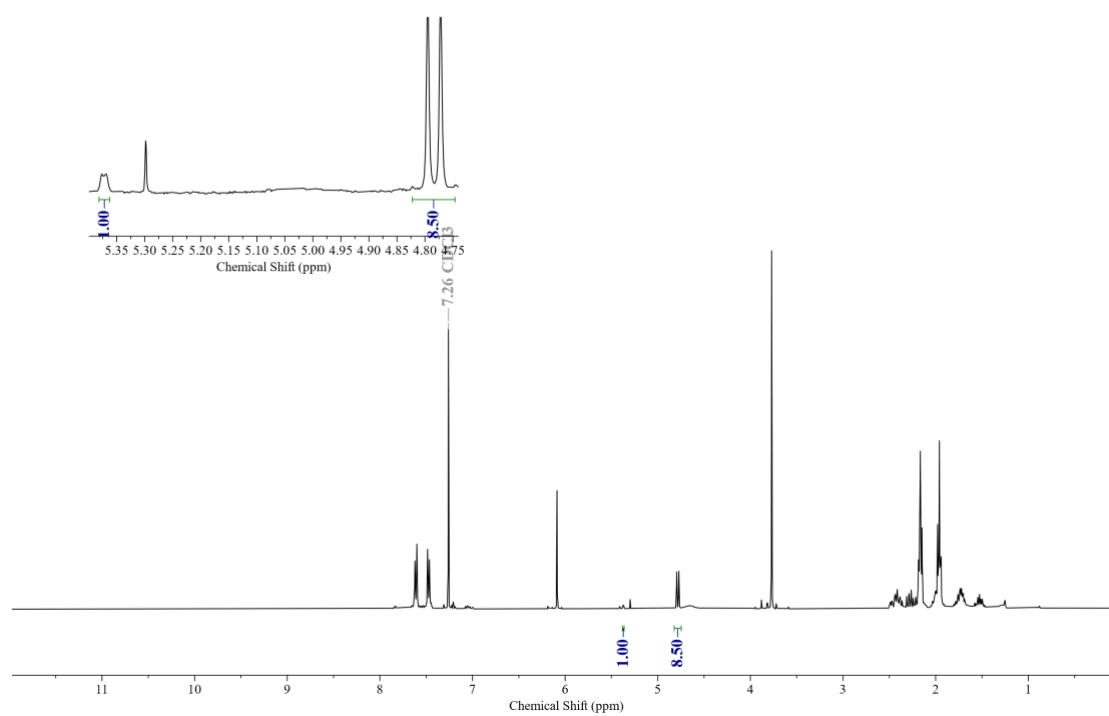

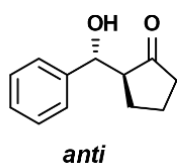

~1:1 anti : syn (racemic)

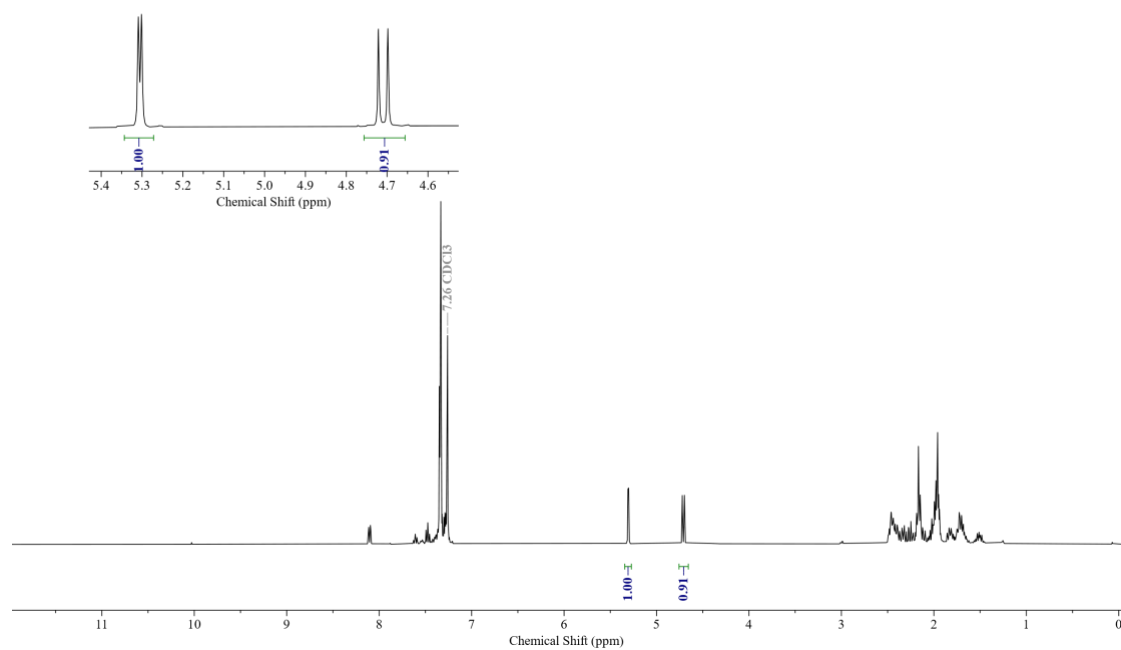



Crude (chiral sample)

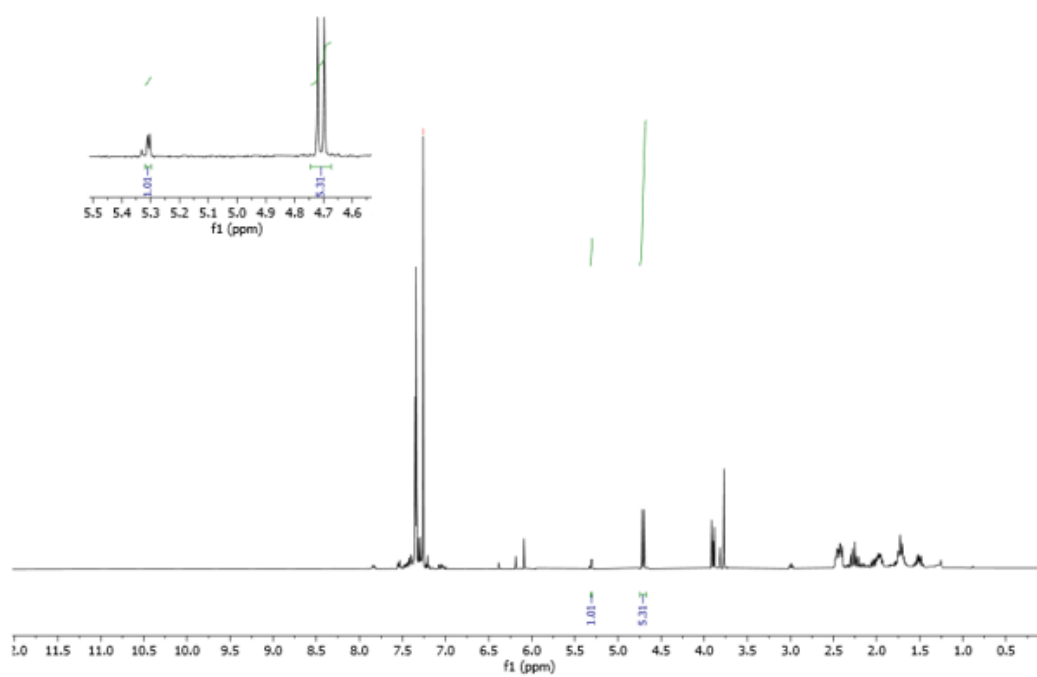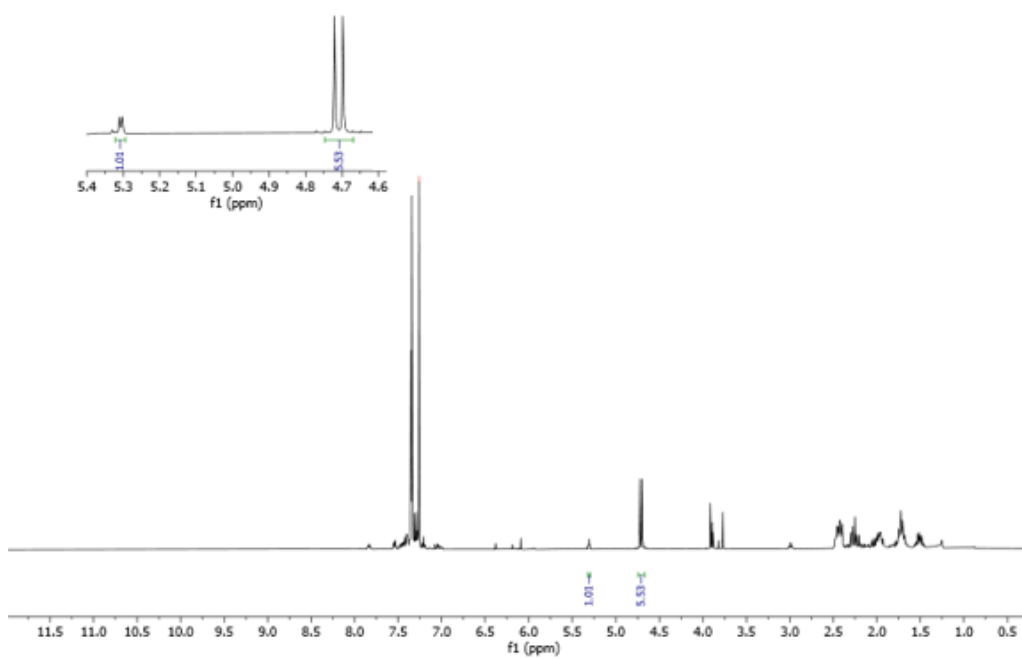

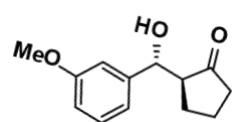

~1:1 anti : syn (racemic)

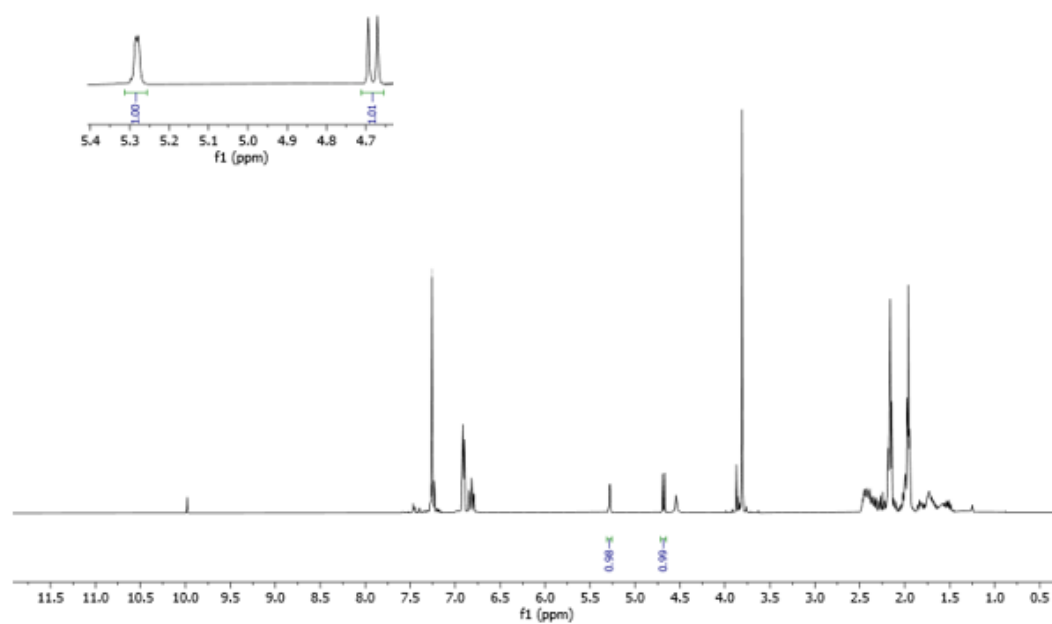

Crude (chiral sample)

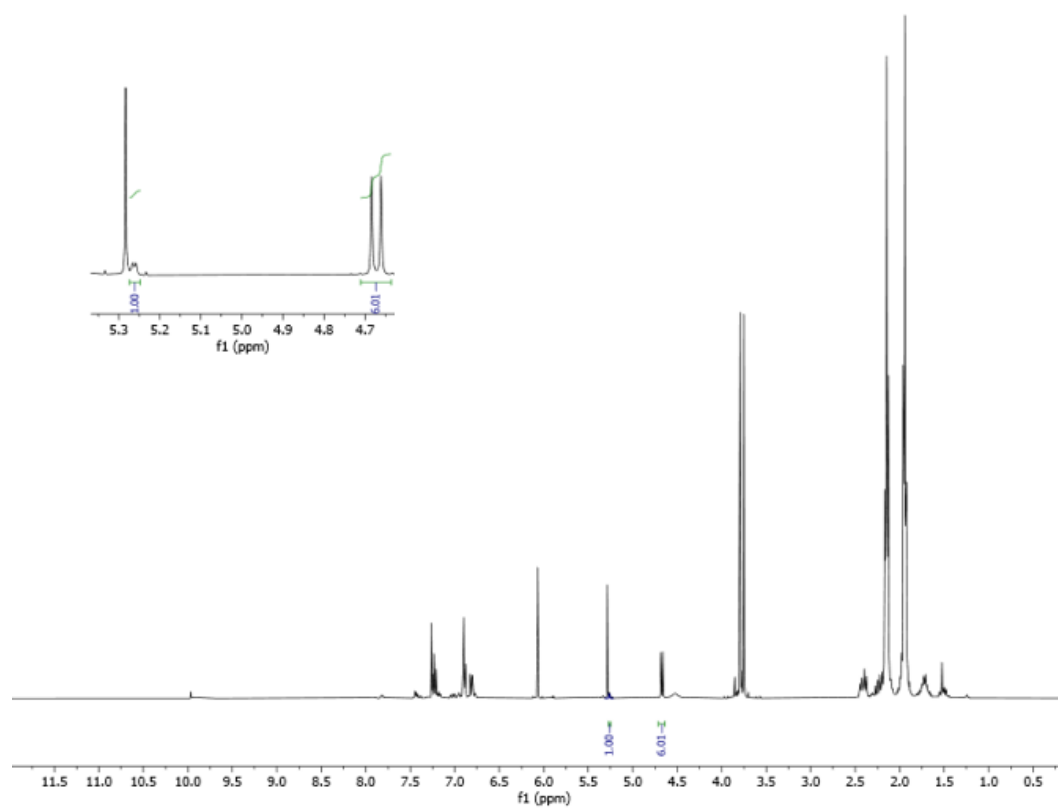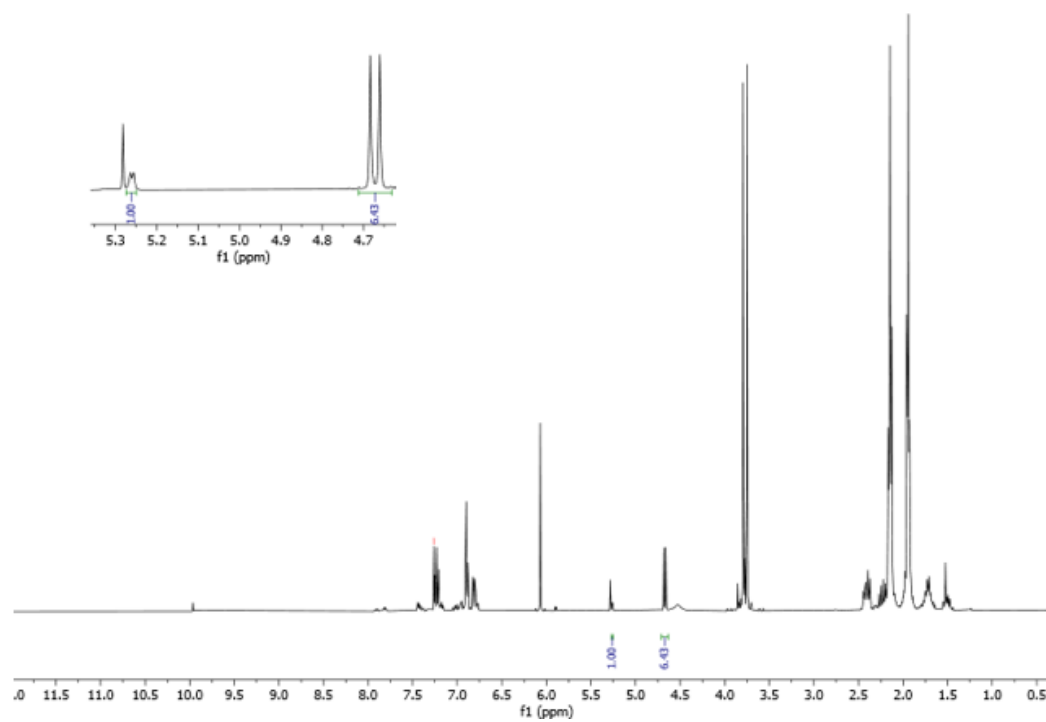

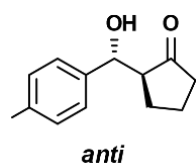

~1:1 anti : syn (racemic)

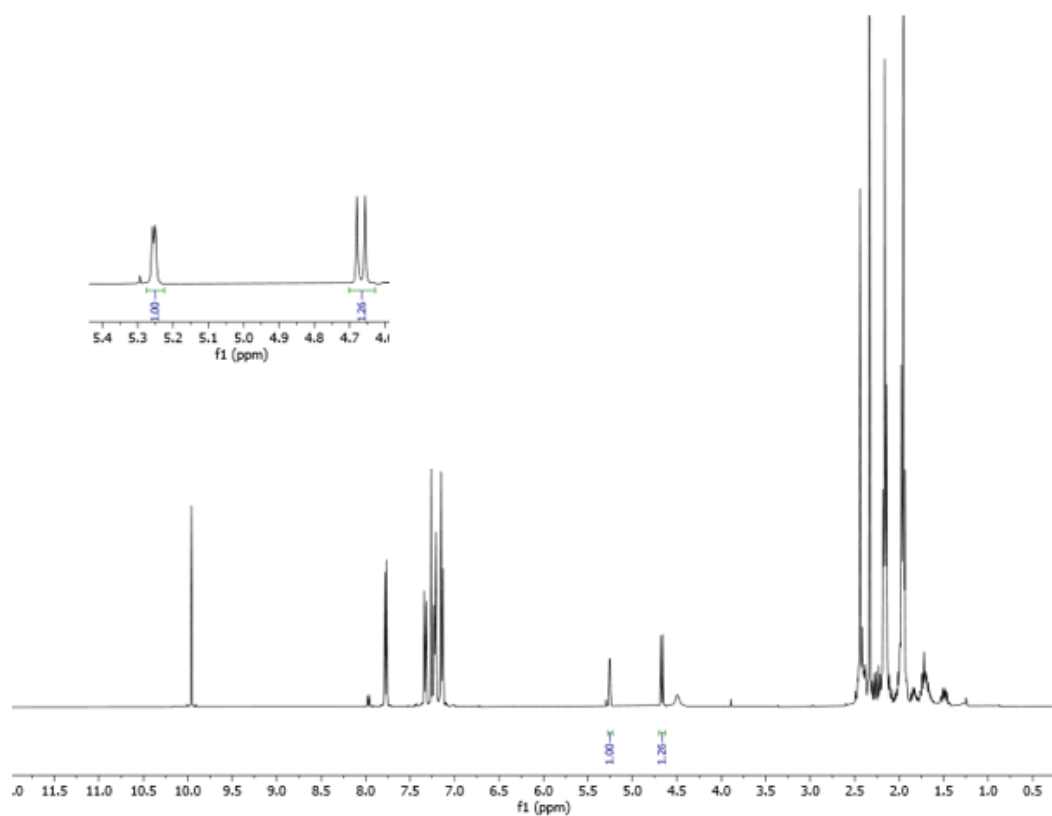

Crude (chiral sample)

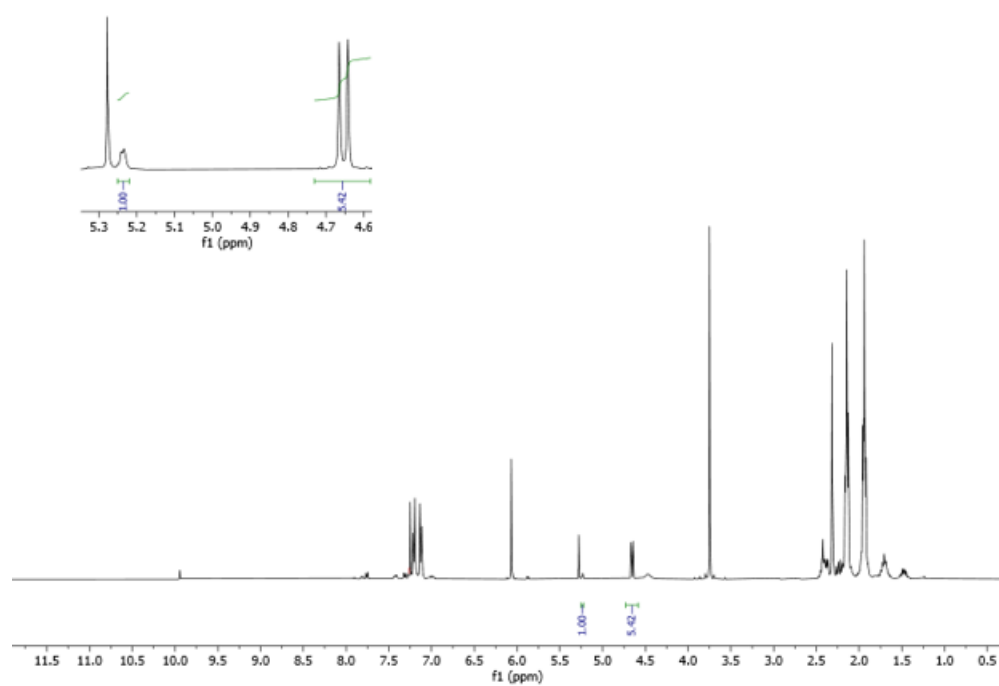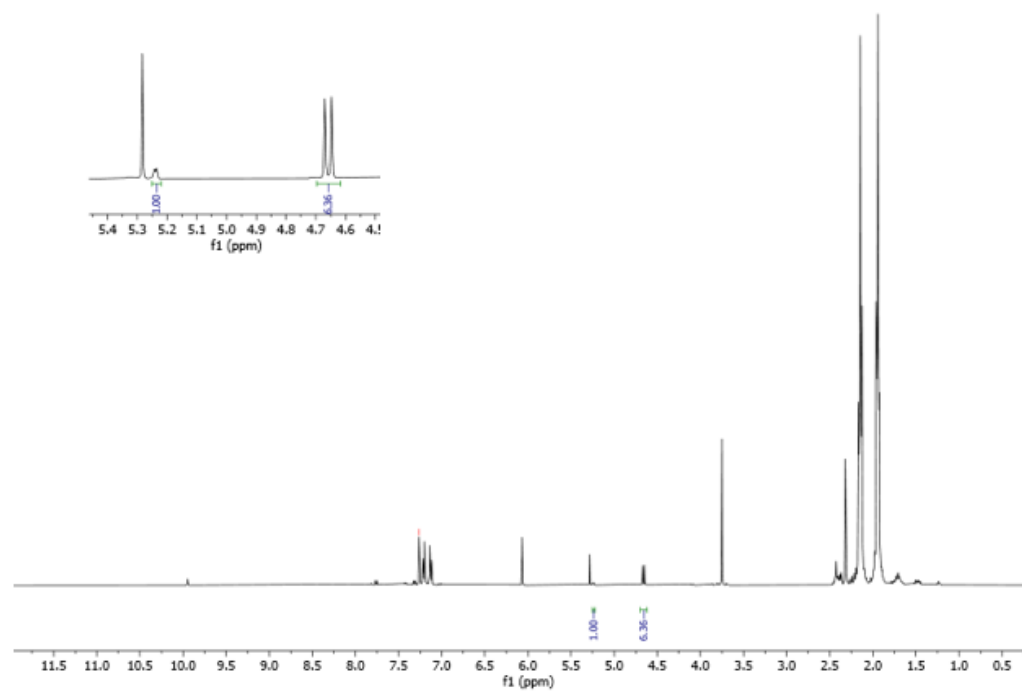

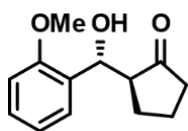

~1:1 anti : syn (racemic)

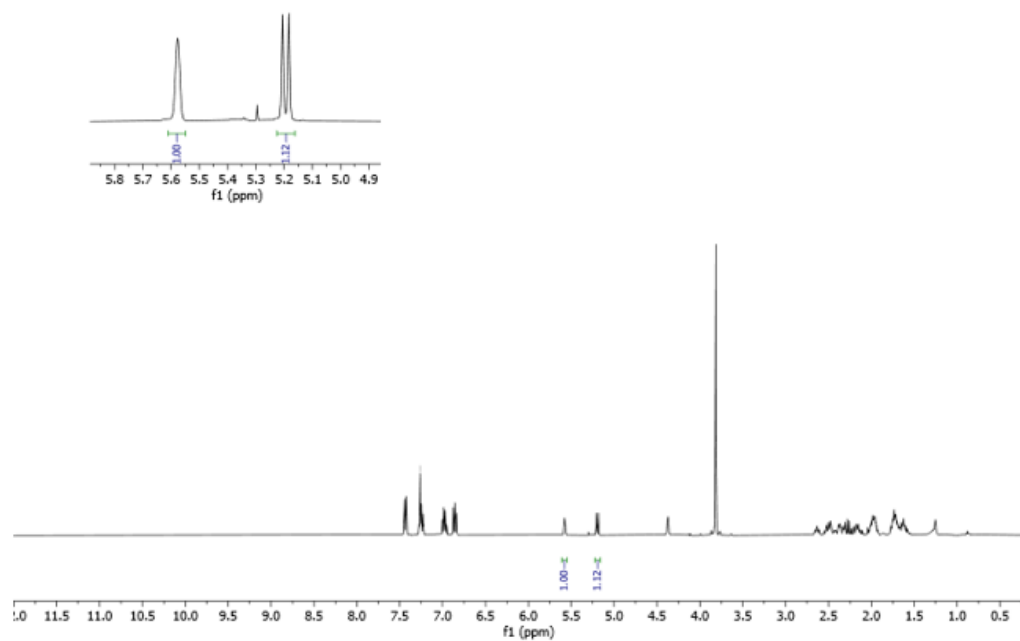

Crude (chiral sample)

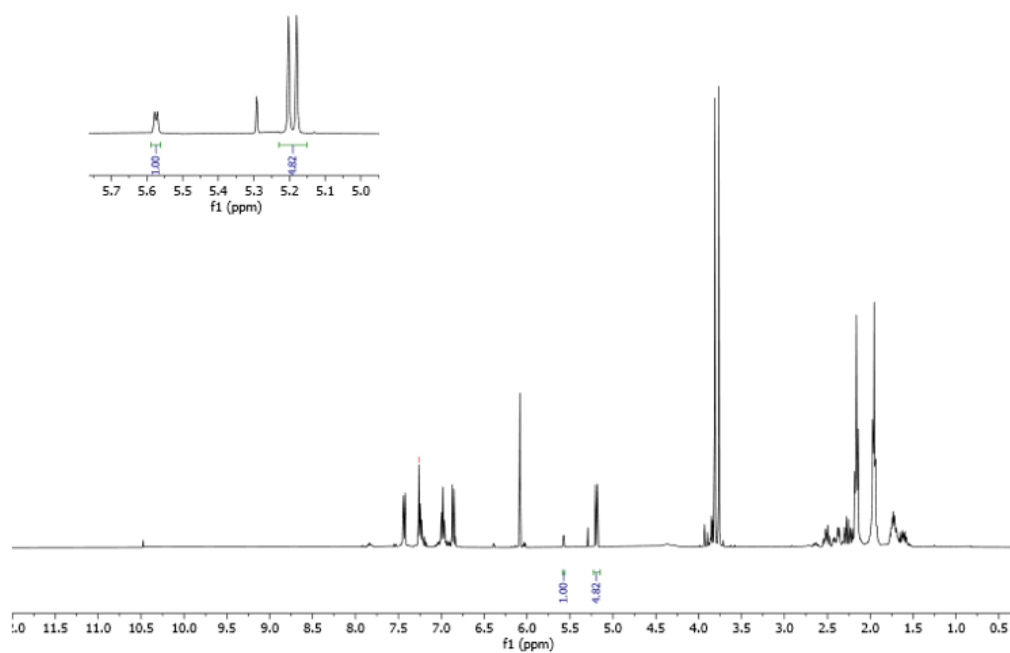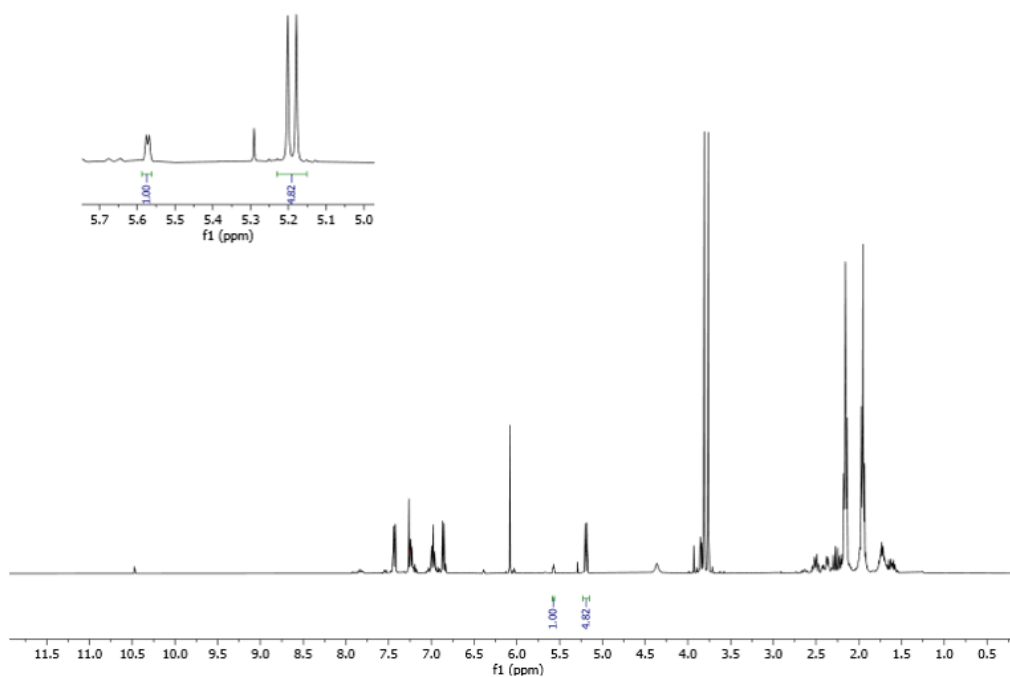

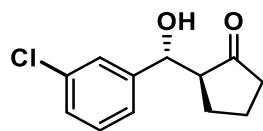

~1:1 anti : syn (racemic)

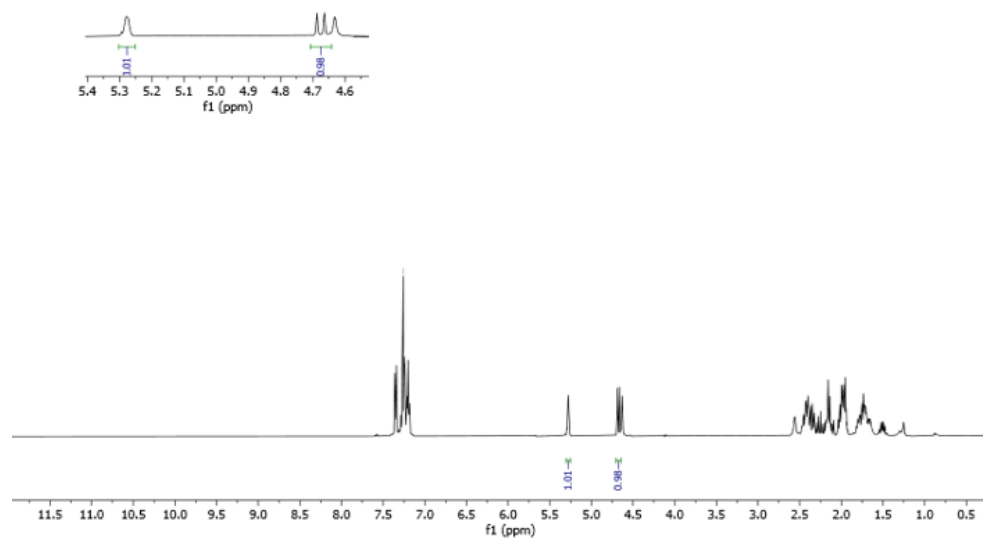



Crude (chiral sample)

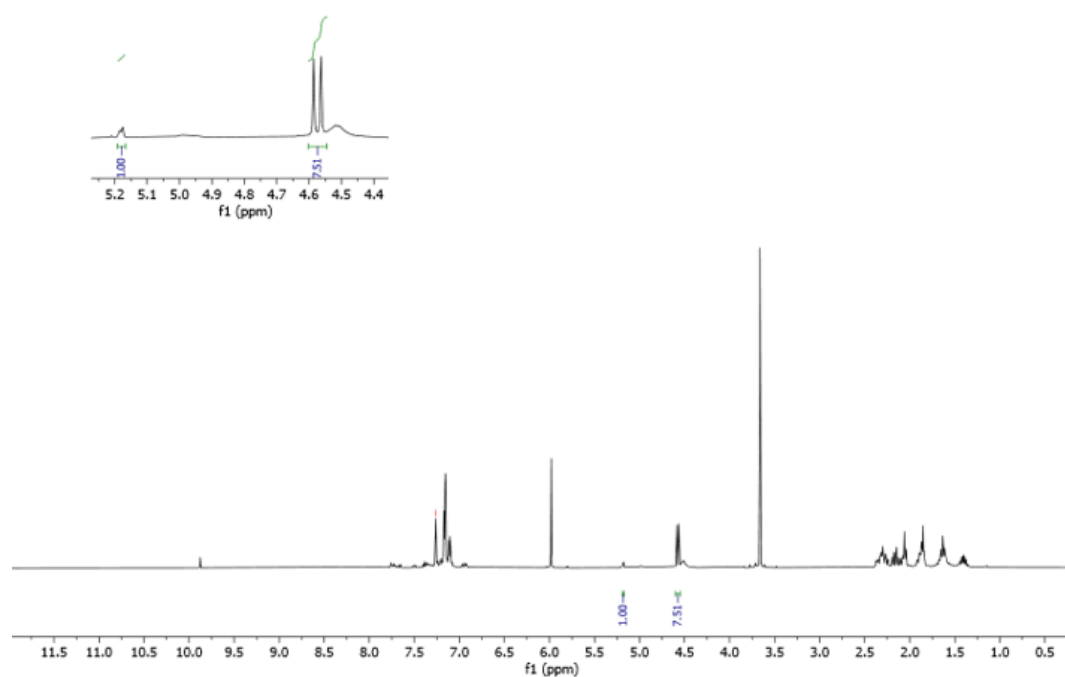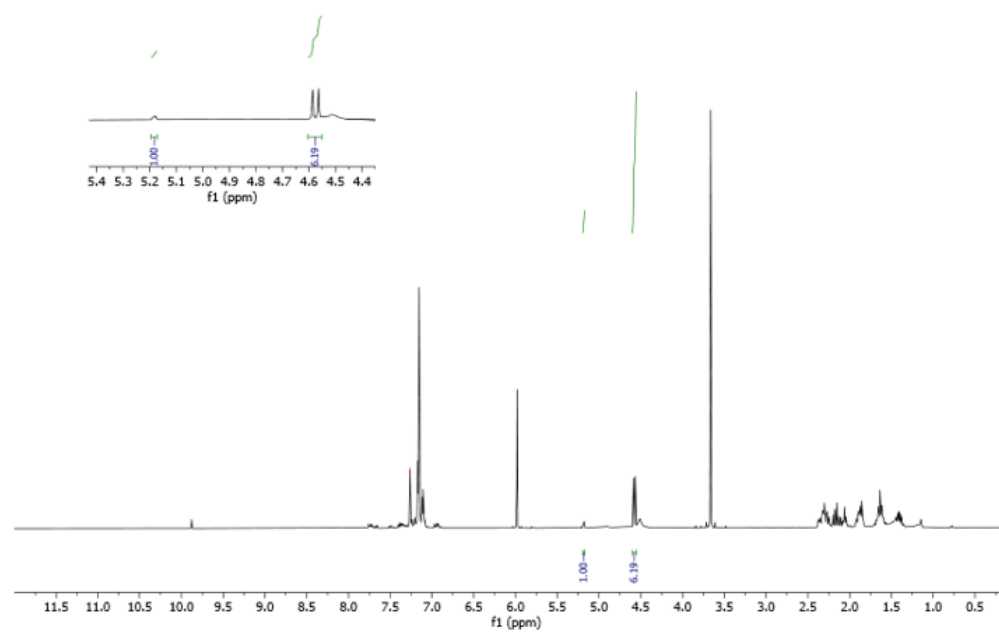

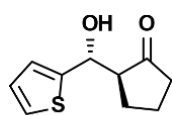

*anti*

~1:1 anti:syn (racemic)

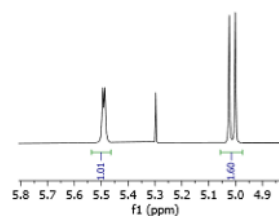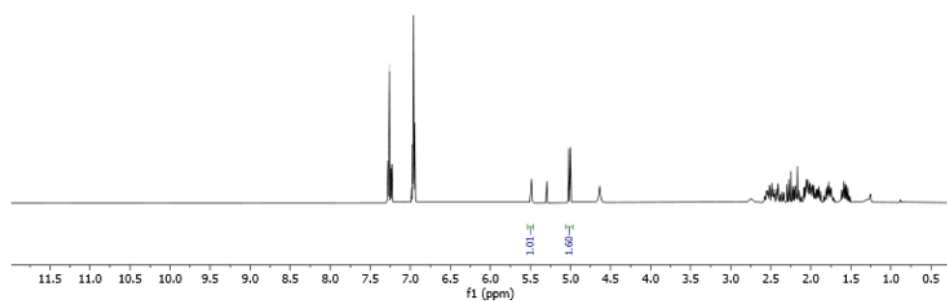

Crude (chiral sample)

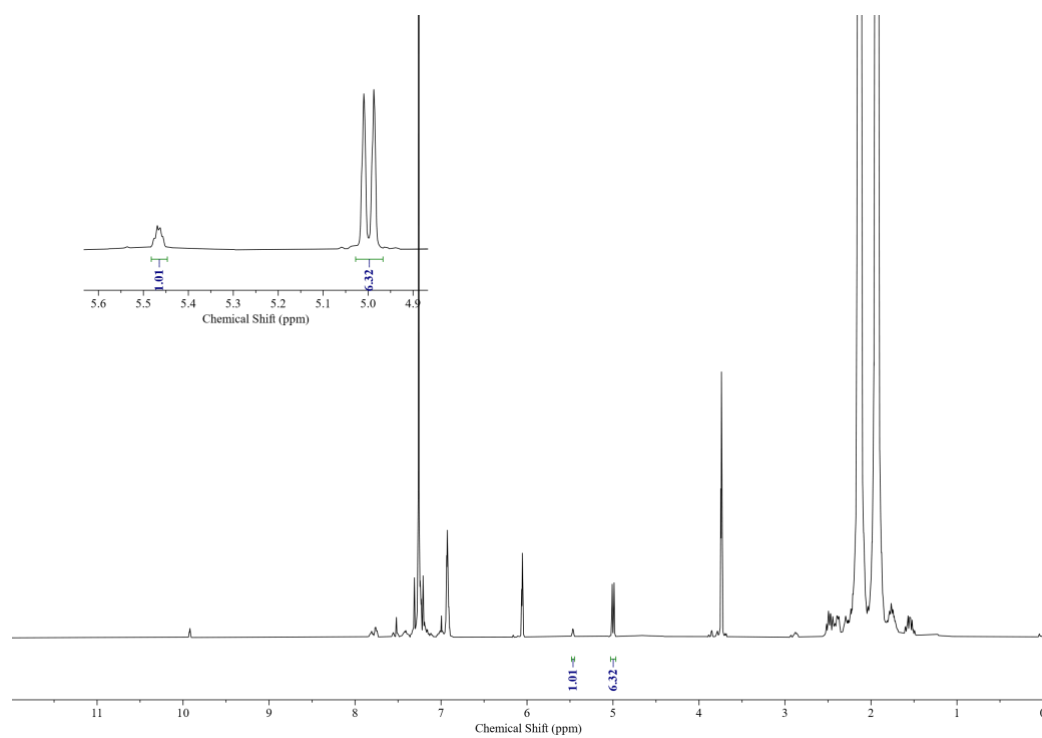

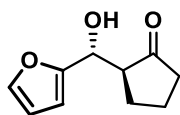

~1:1 anti:syn (racemic)

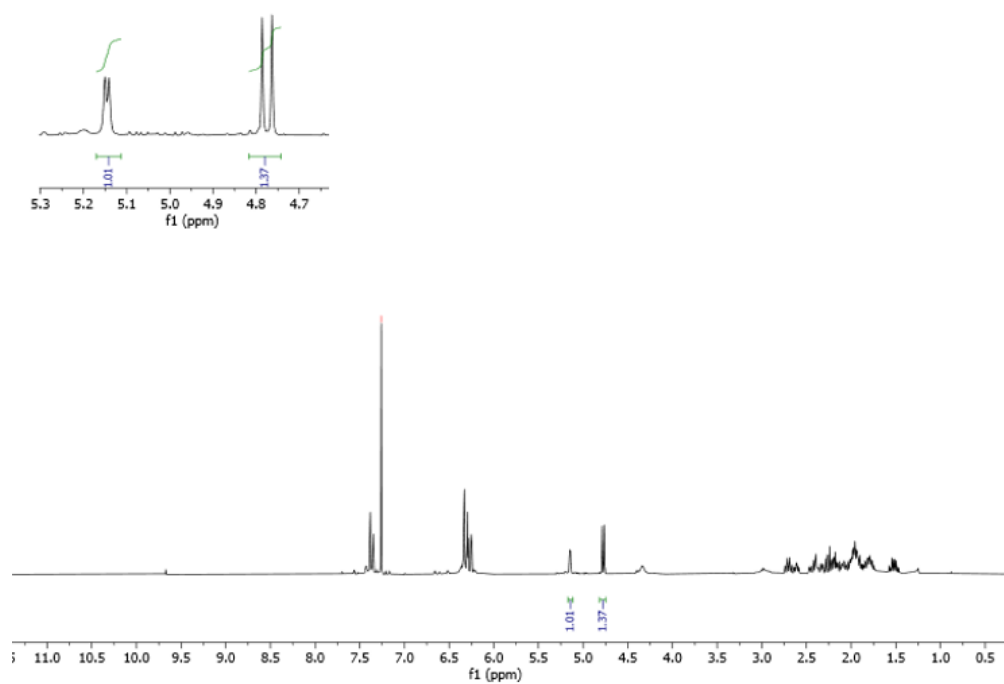

Crude (chiral sample)

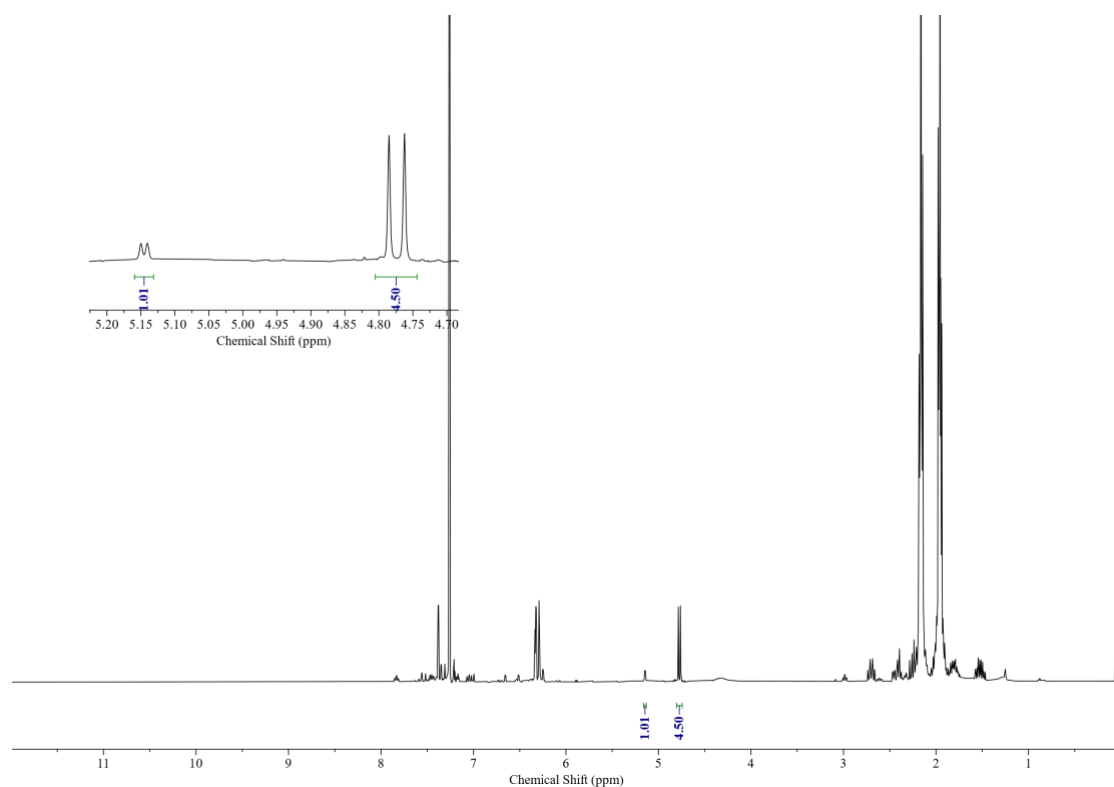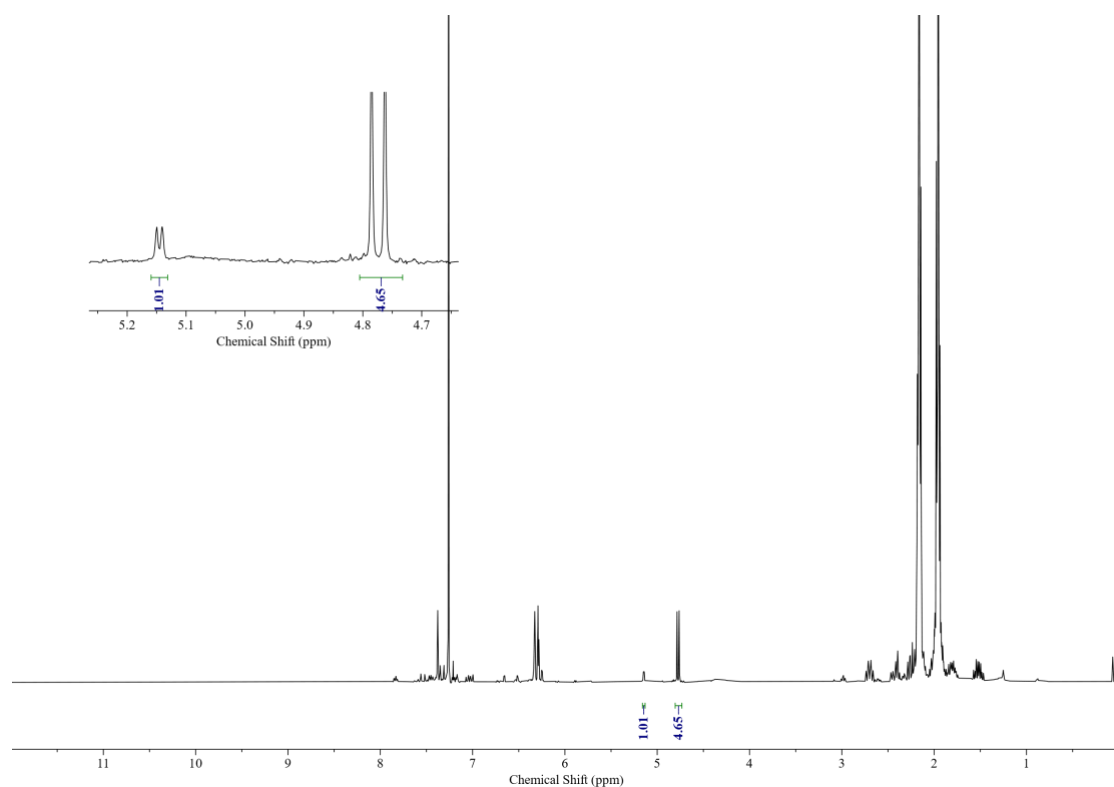

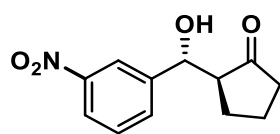

Crude (chiral sample)

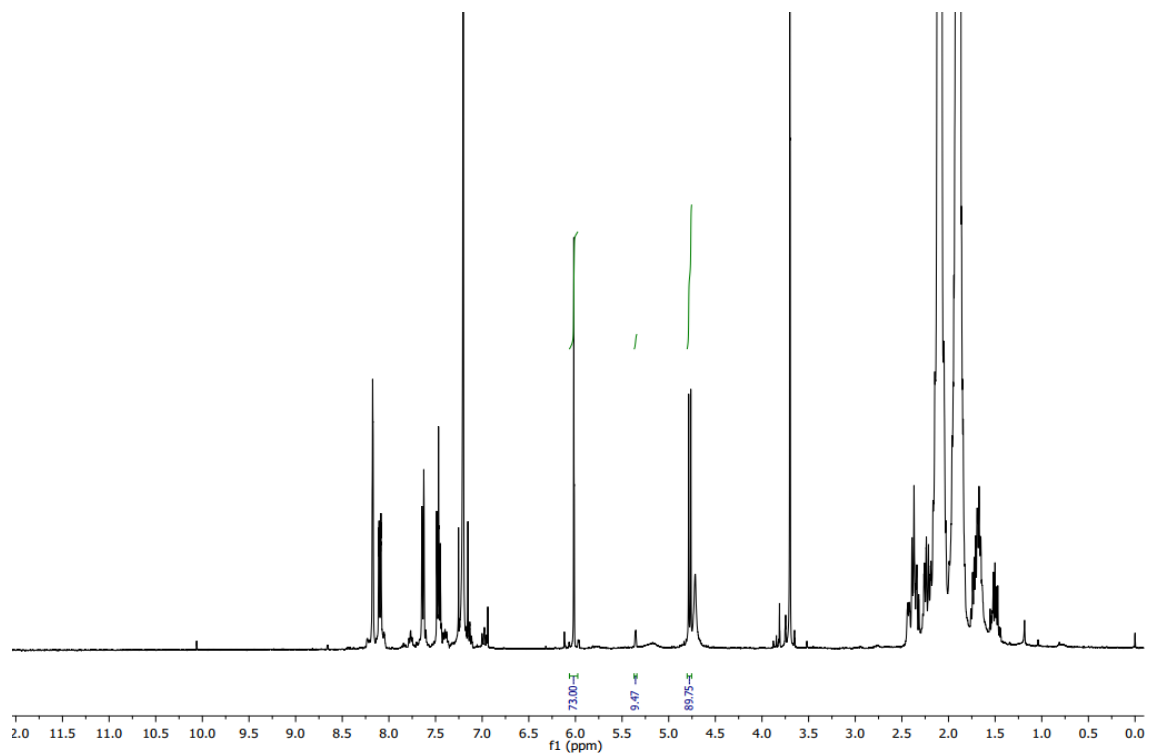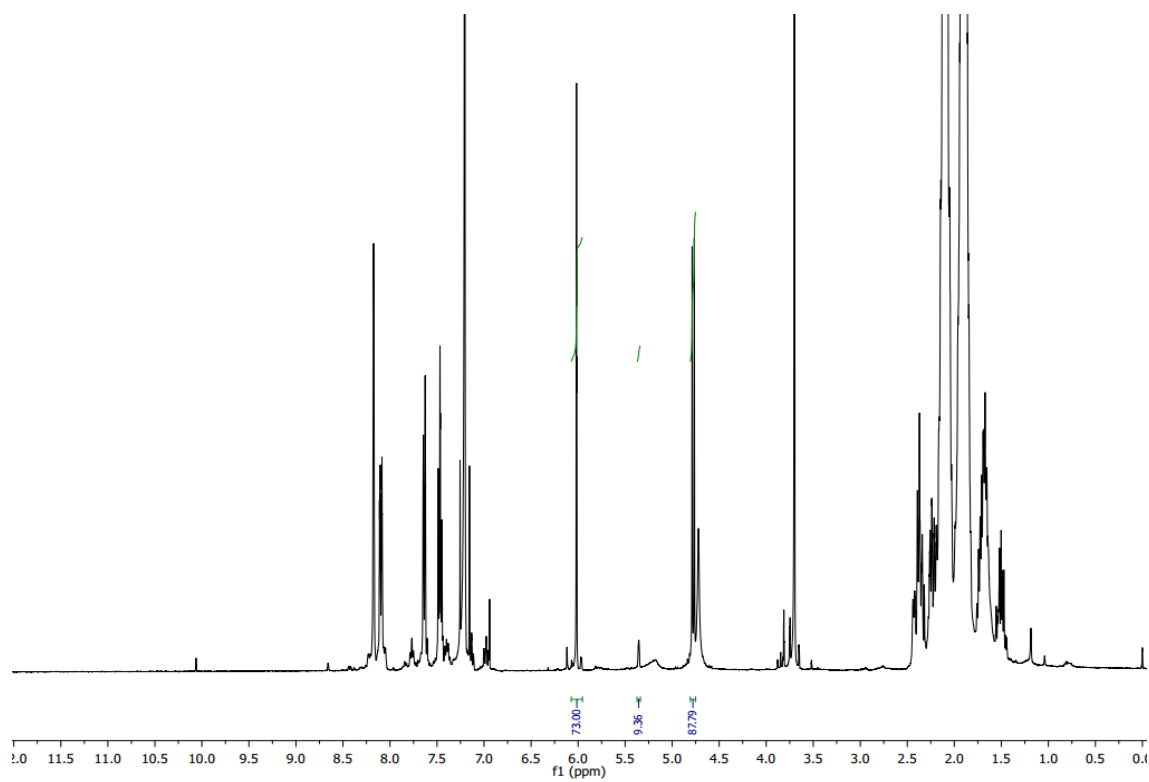

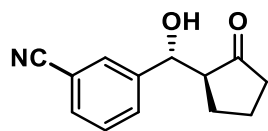

Crude (chiral sample)

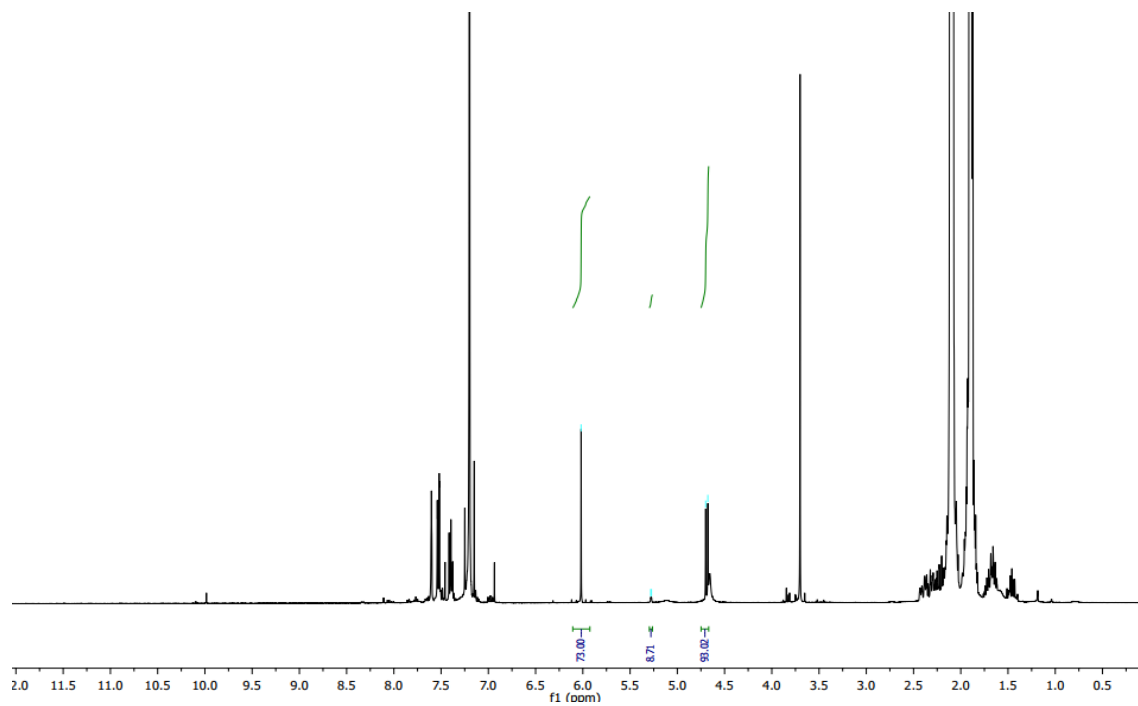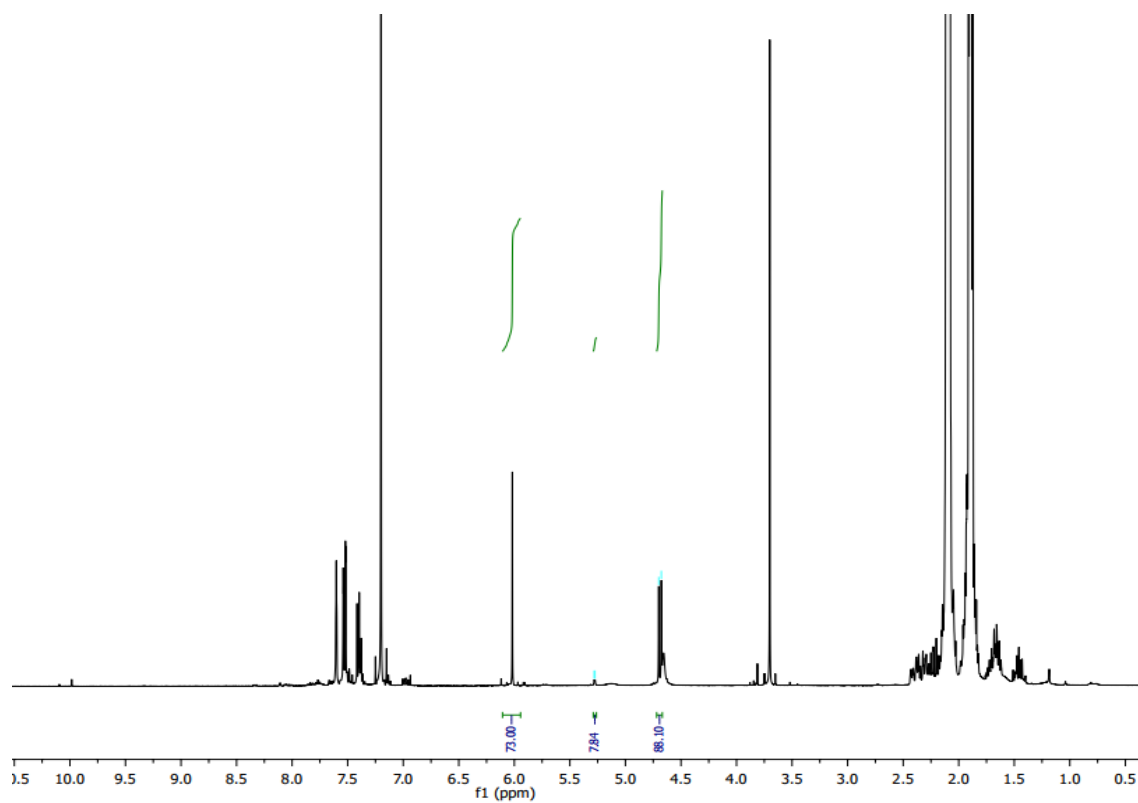

H-NMR<sup>1</sup>

~1:1 anti:syn (racemic)

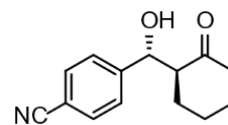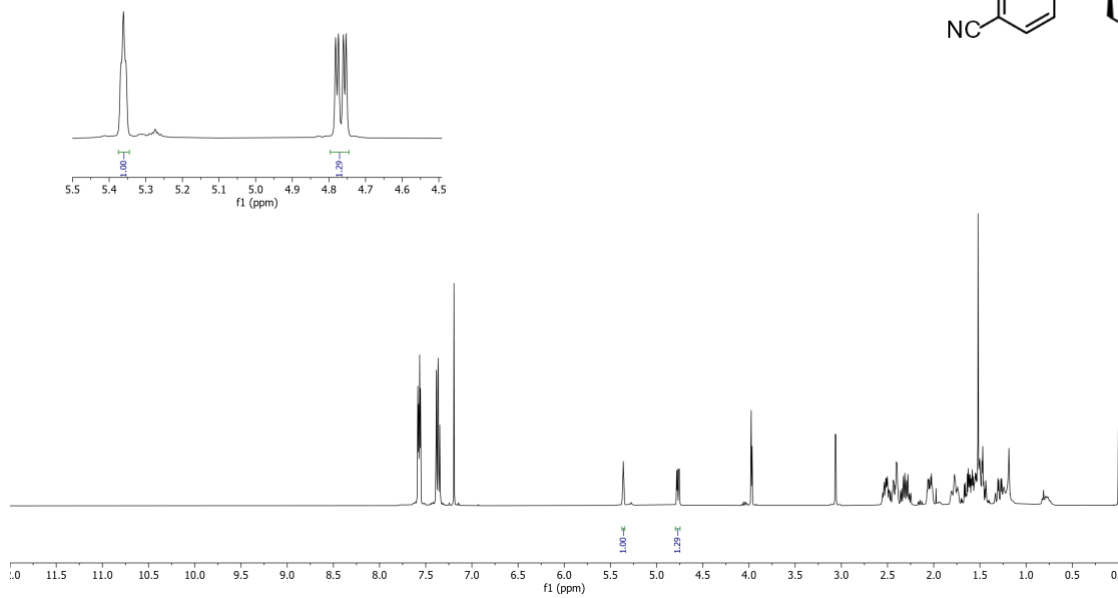



Crude (chiral sample)

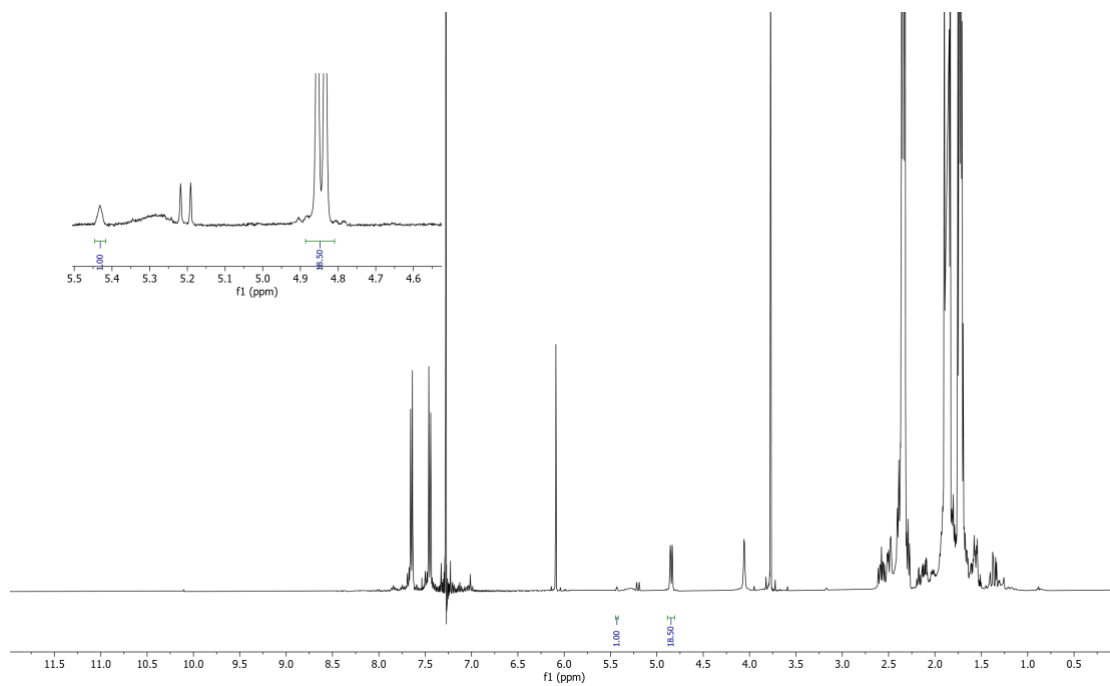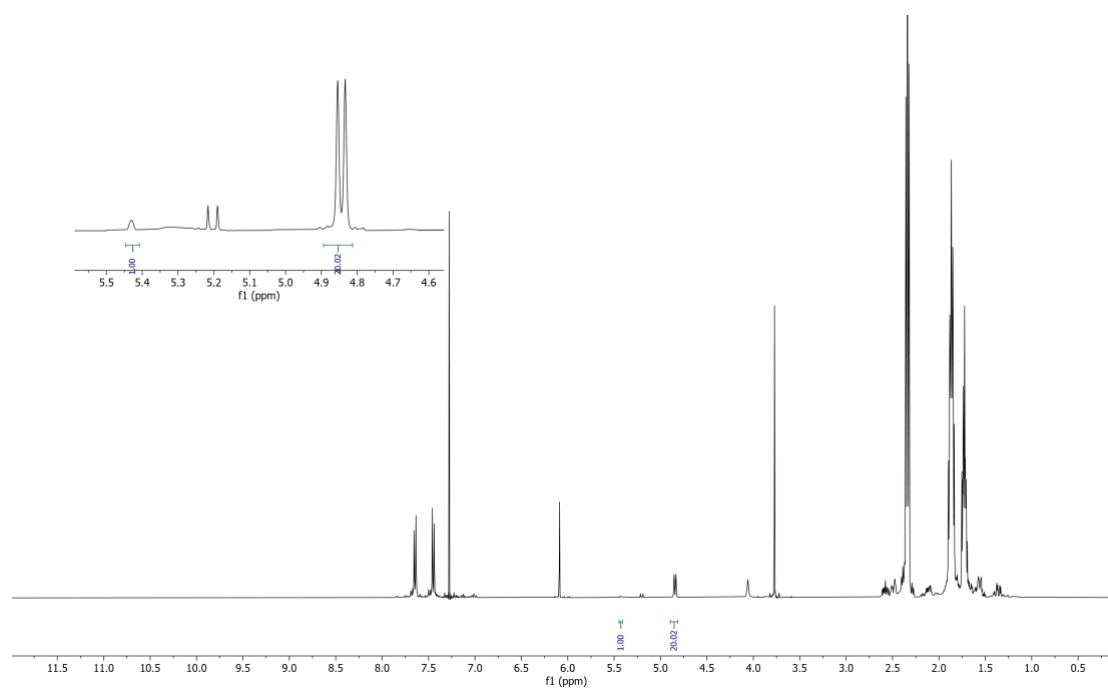

H-NMR<sup>1</sup>

~1:1 anti:syn (racemic)

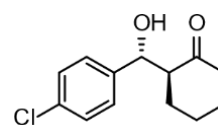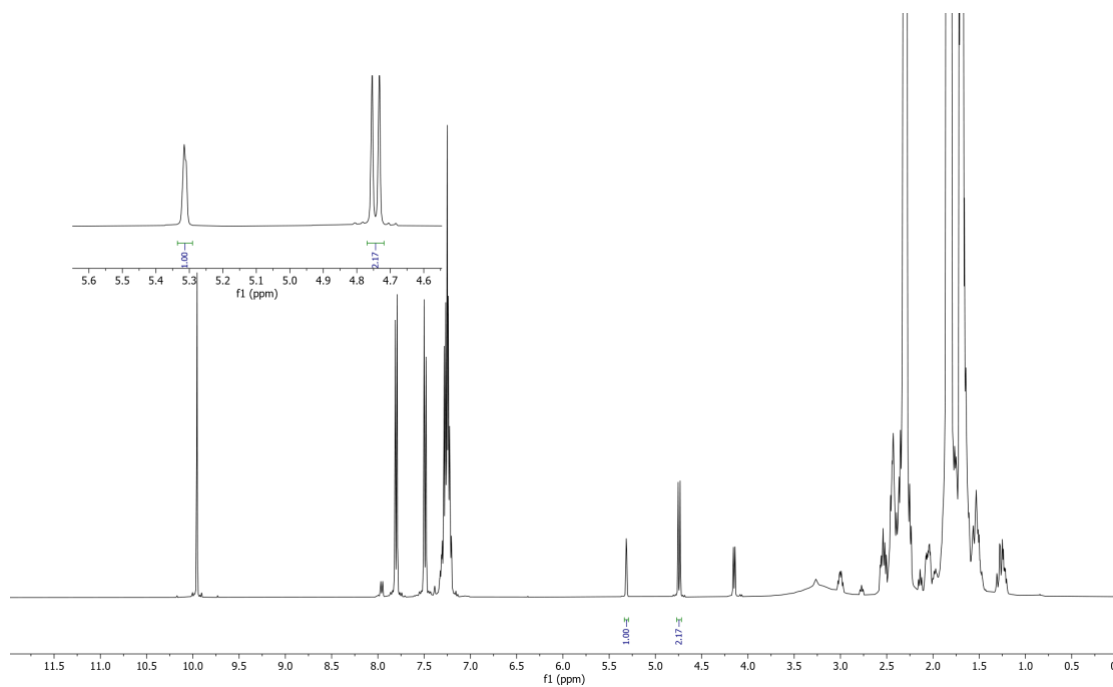

Crude (chiral sample)

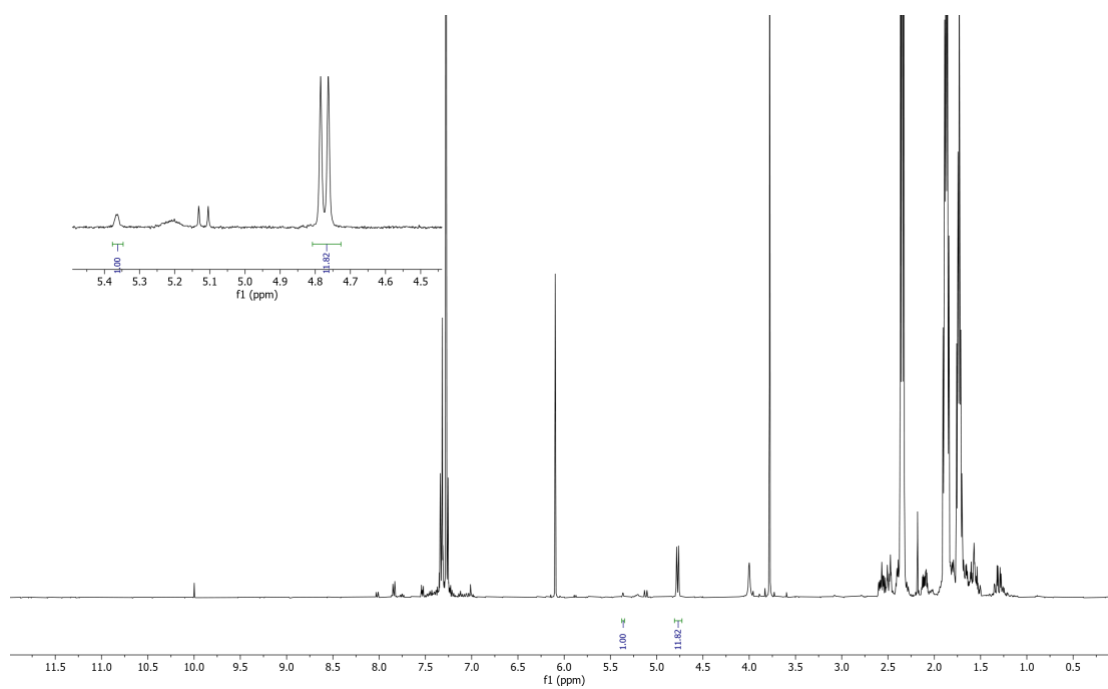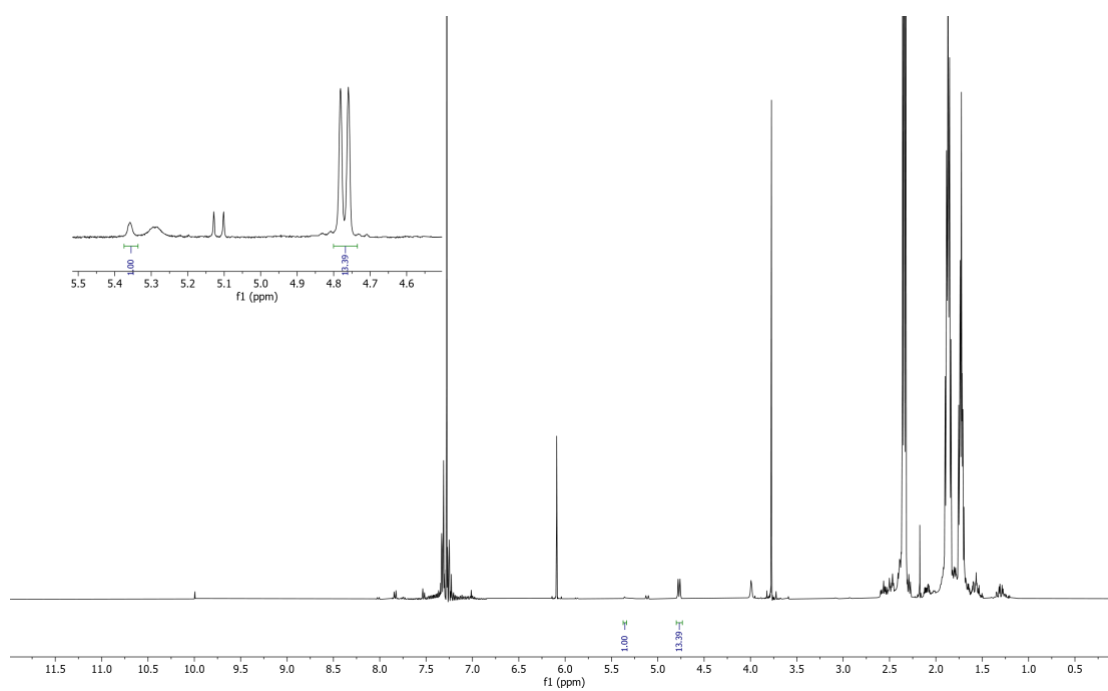

<sup>1</sup>H-NMR

~1:1 anti:syn (racemic)

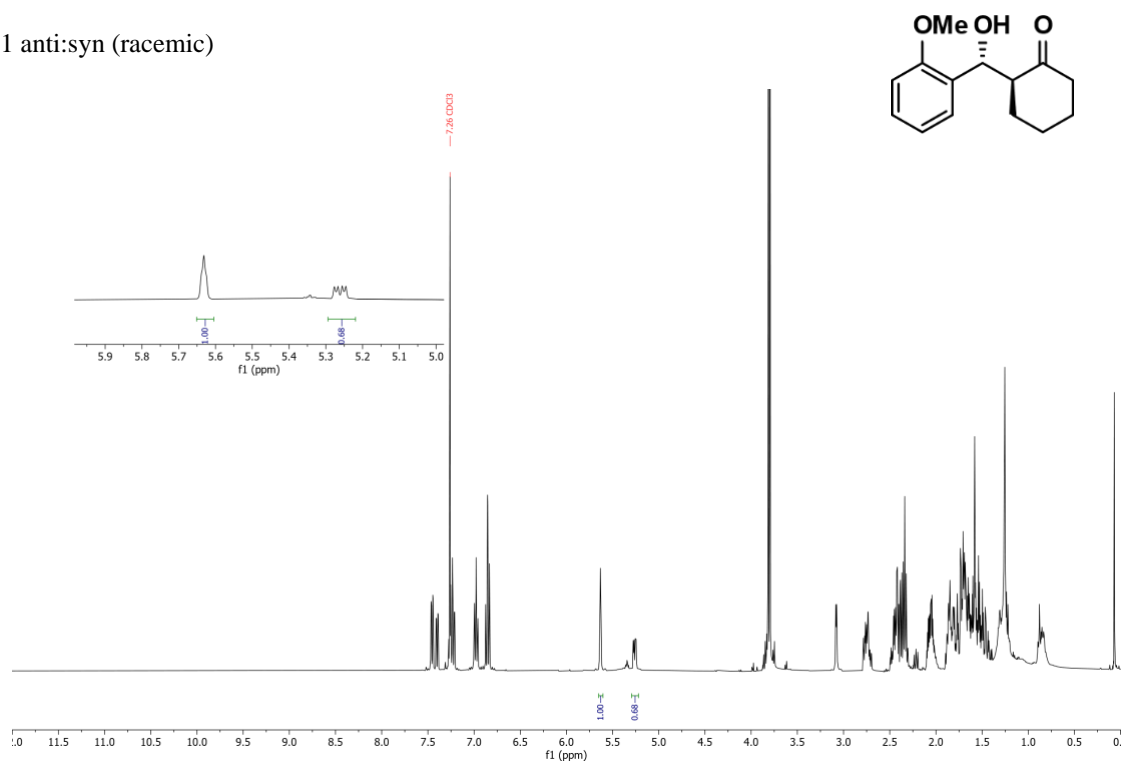

Crude (chiral sample)

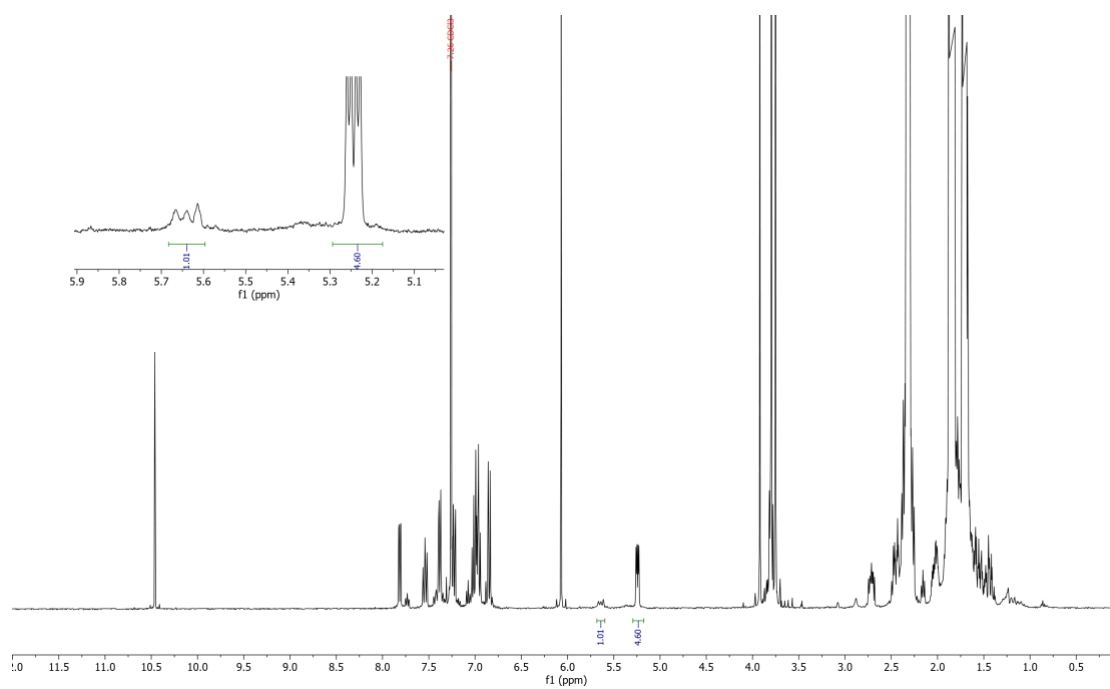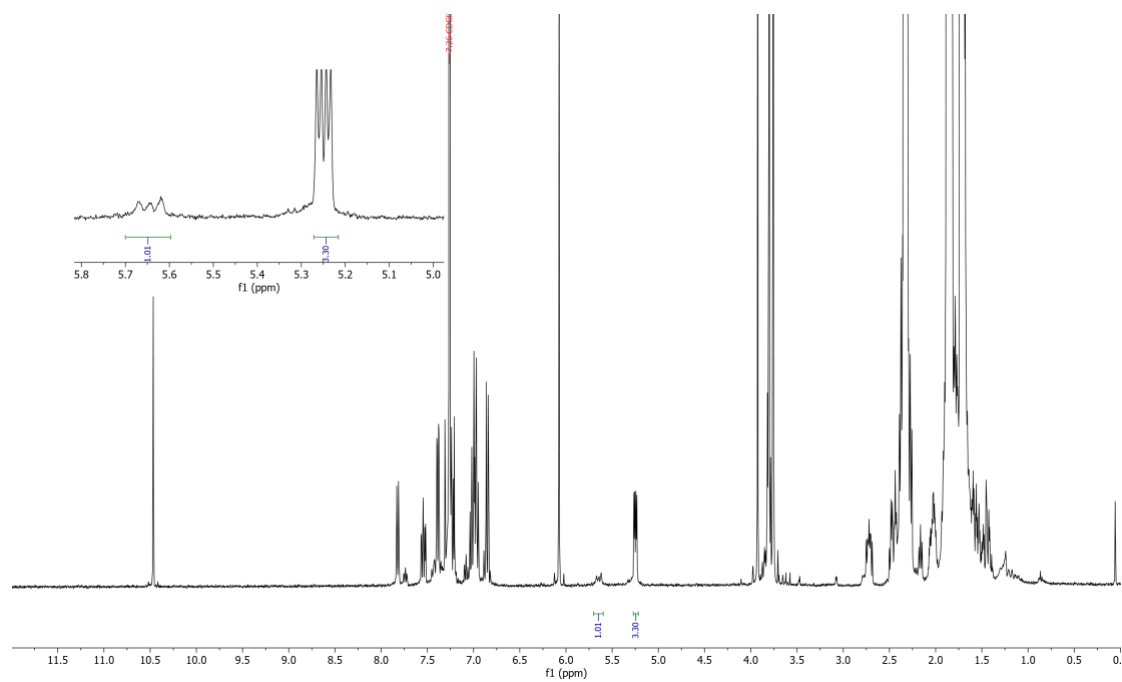

$^1\text{H}$ -NMR

~1:1 anti:syn (racemic)

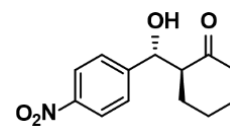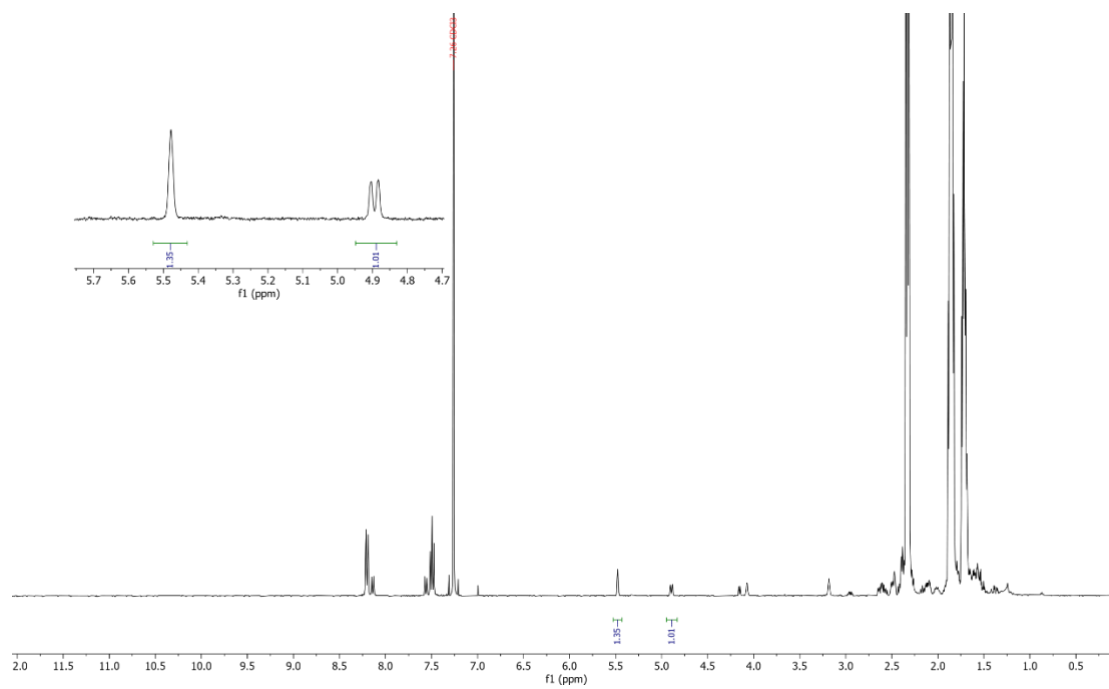

Crude (chiral sample)

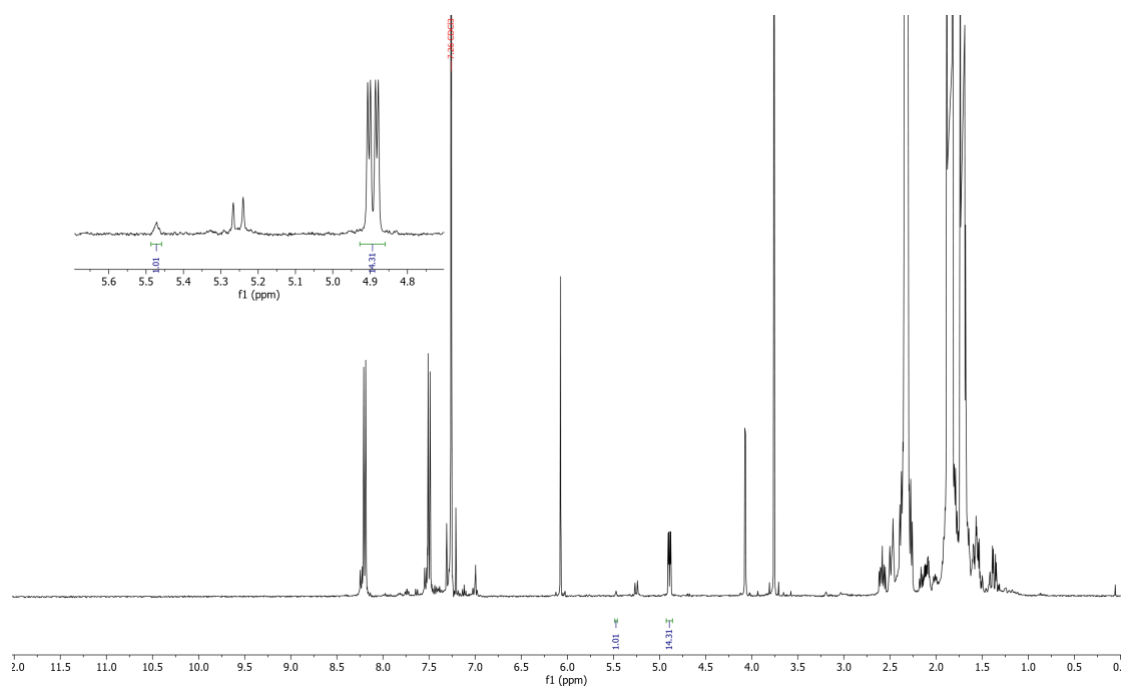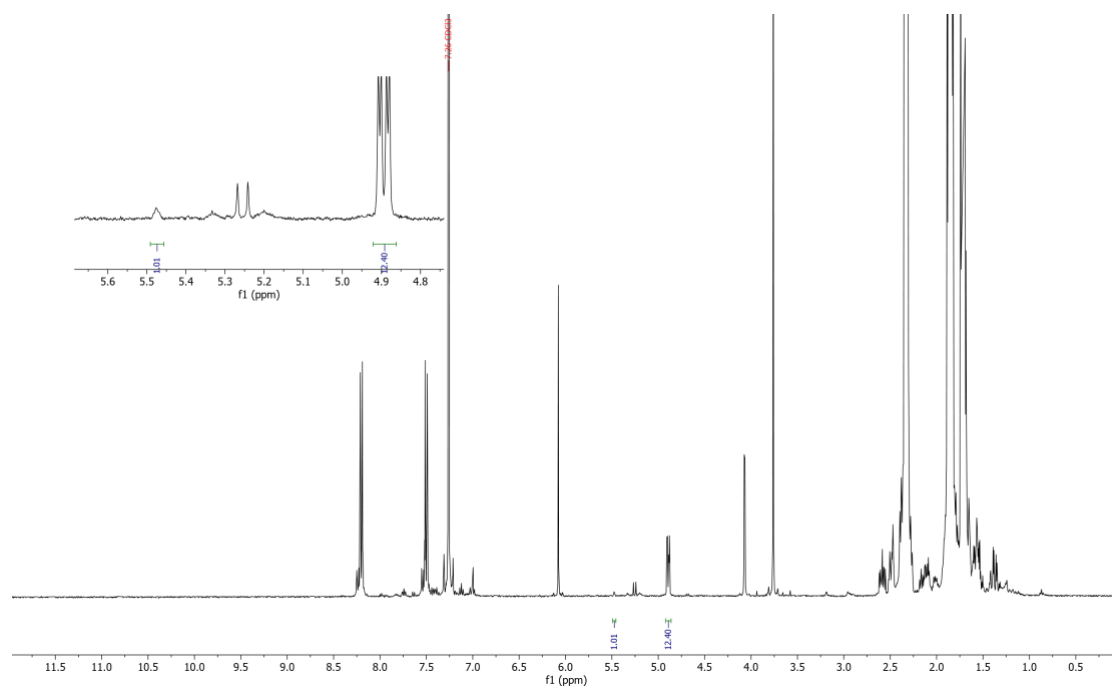

# <sup>1</sup>H-NMR

~1:1 anti:syn (racemic)

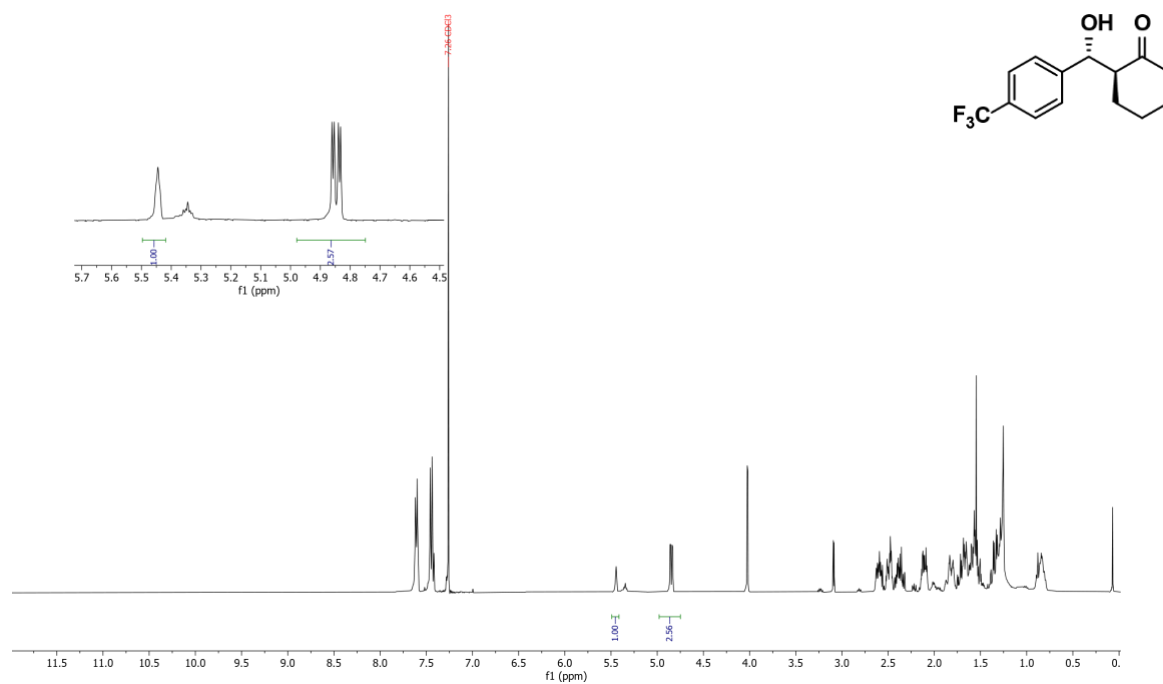



Crude (chiral sample)

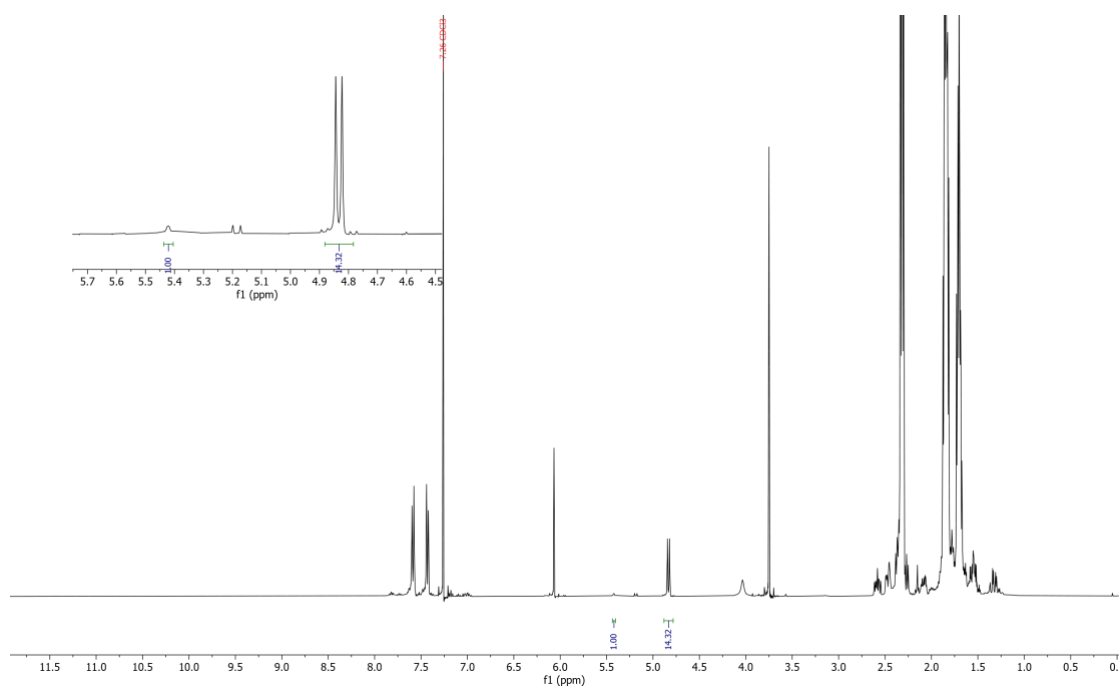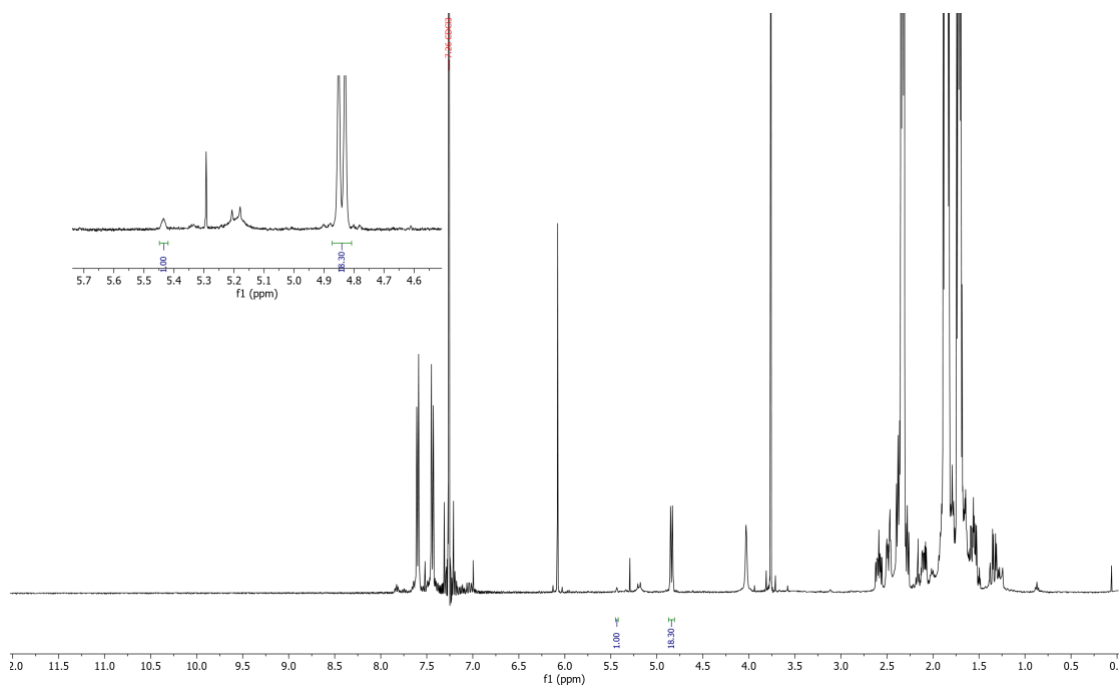

## 18.2 Solvent screening (table S2)

Hexane as a solvent:

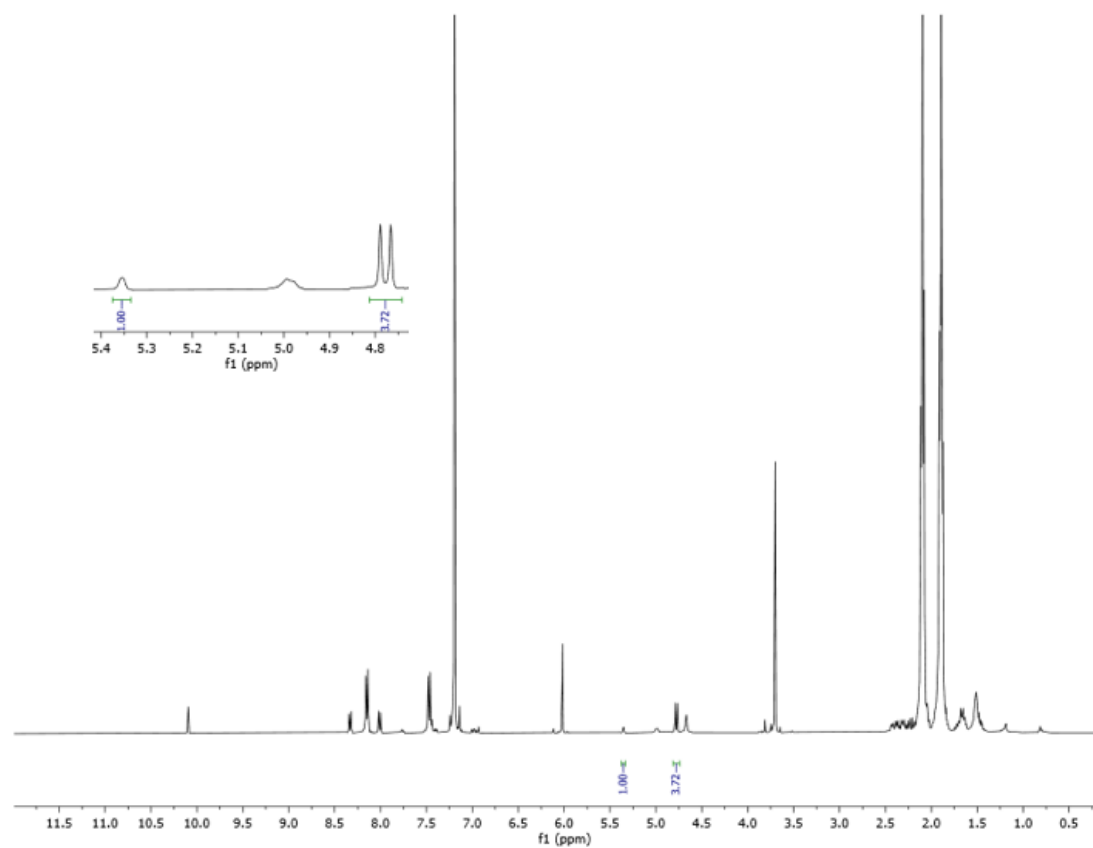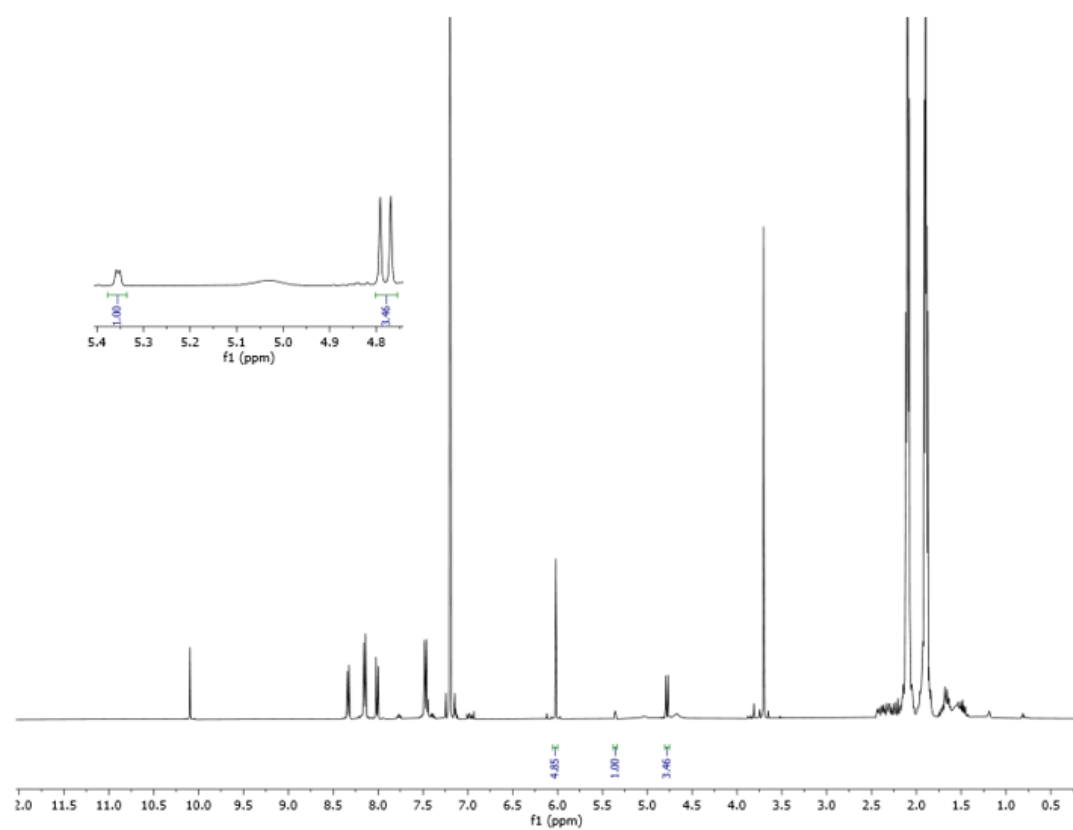

CH<sub>3</sub>CN as a solvent:

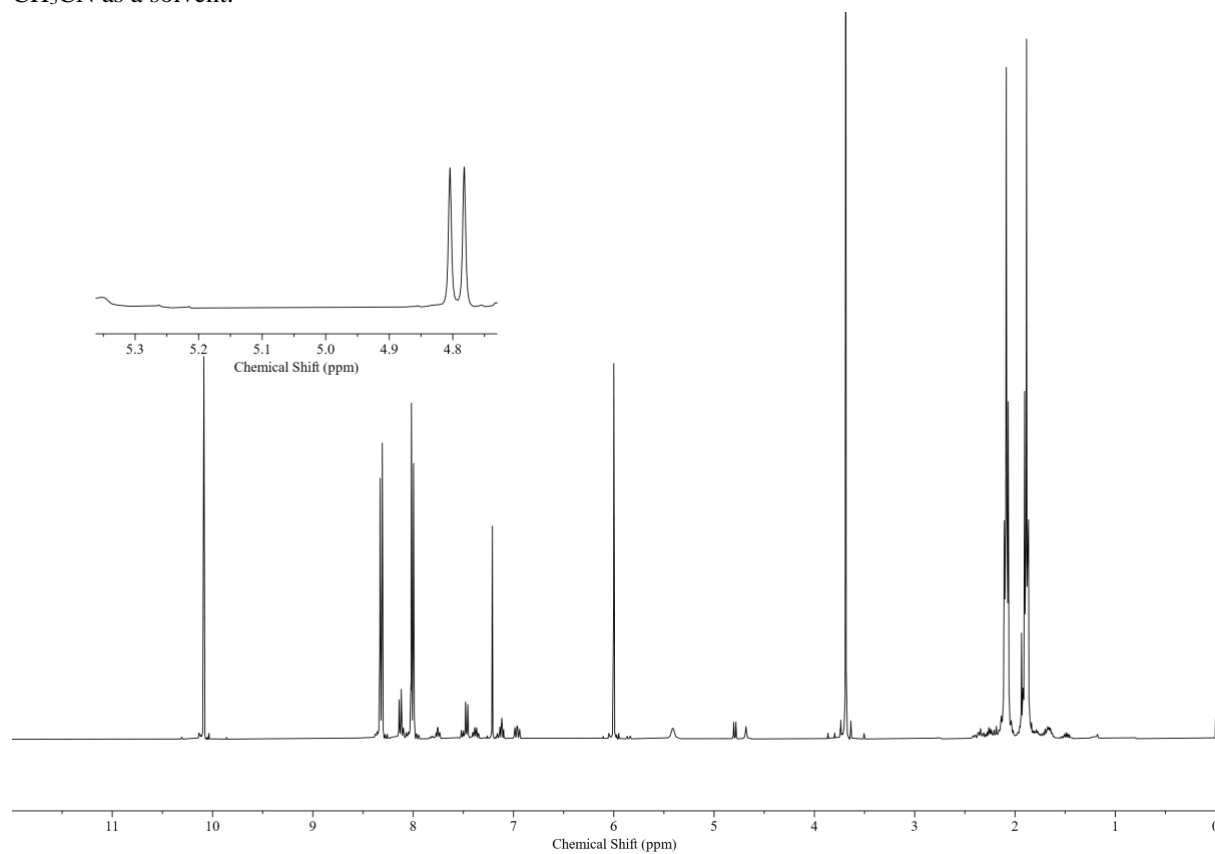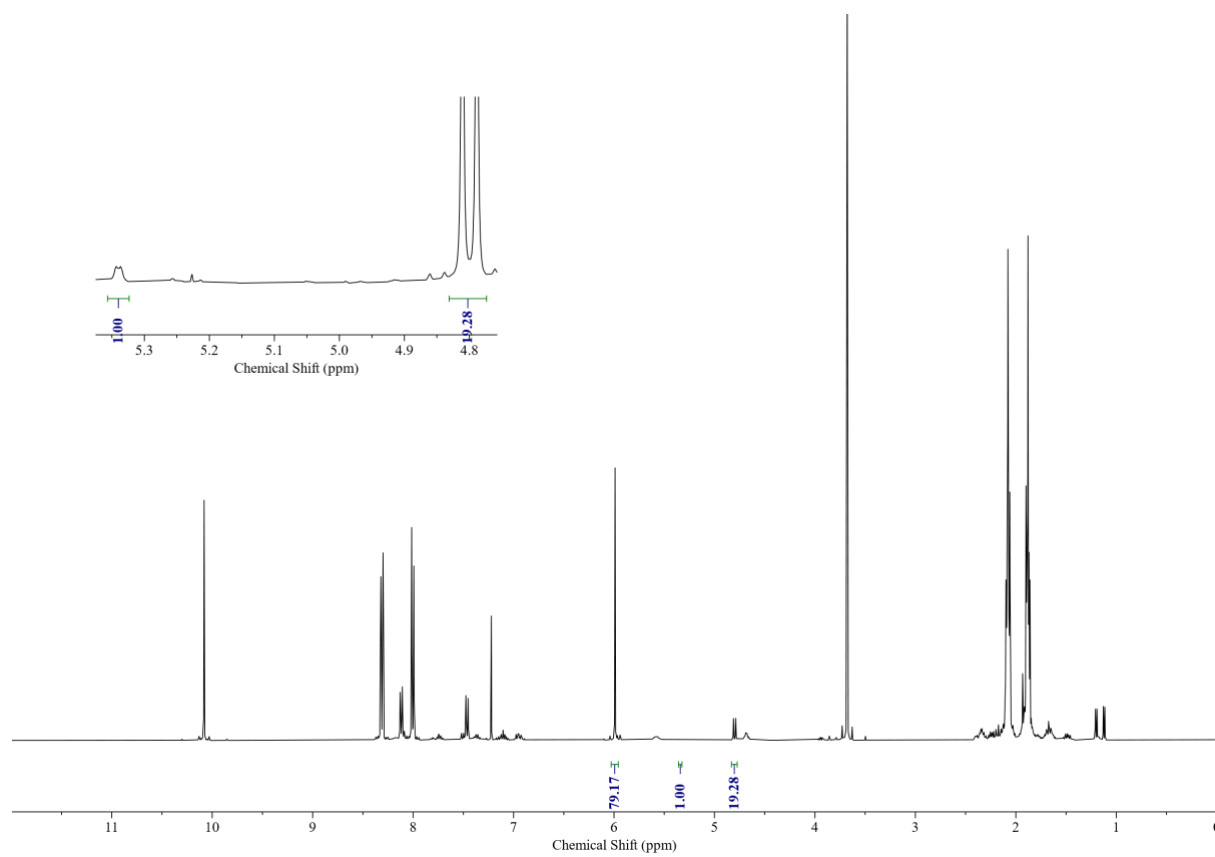

$\text{CHCl}_3$  as a solvent:

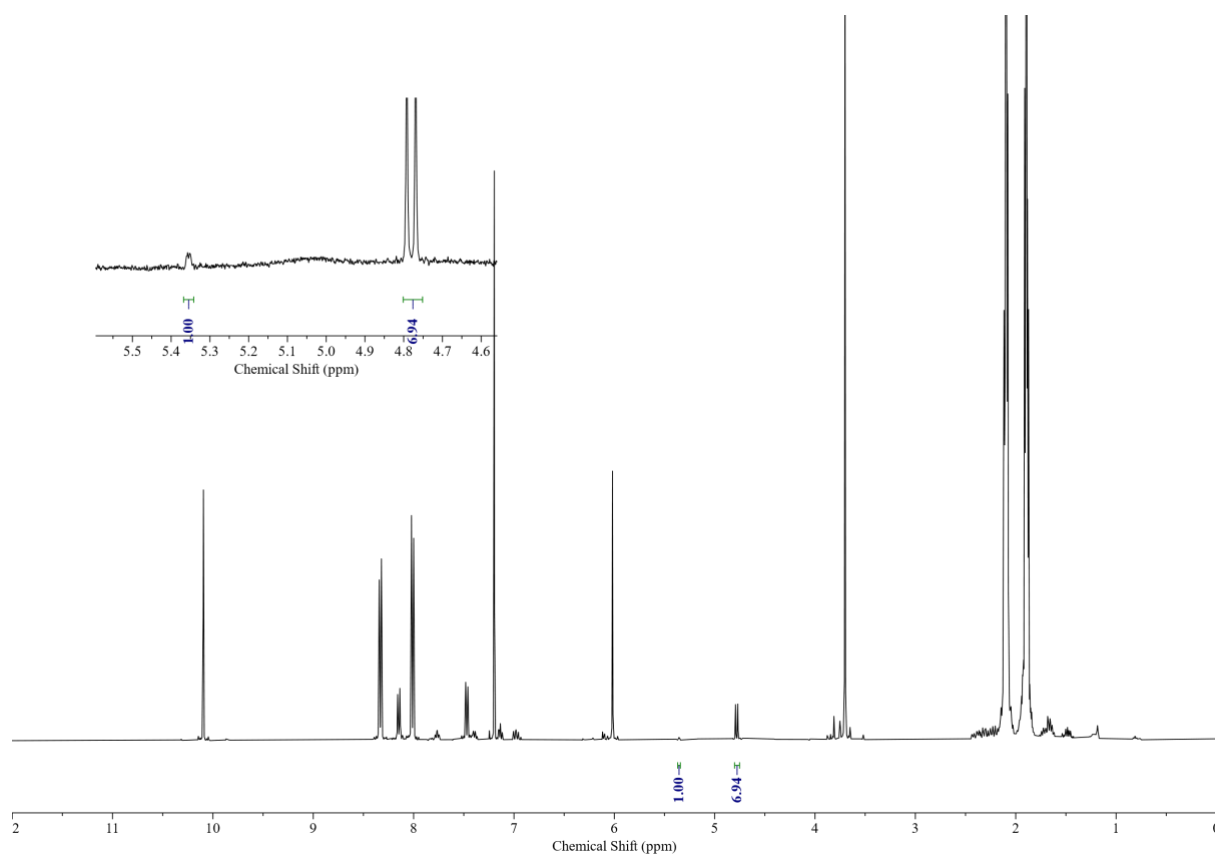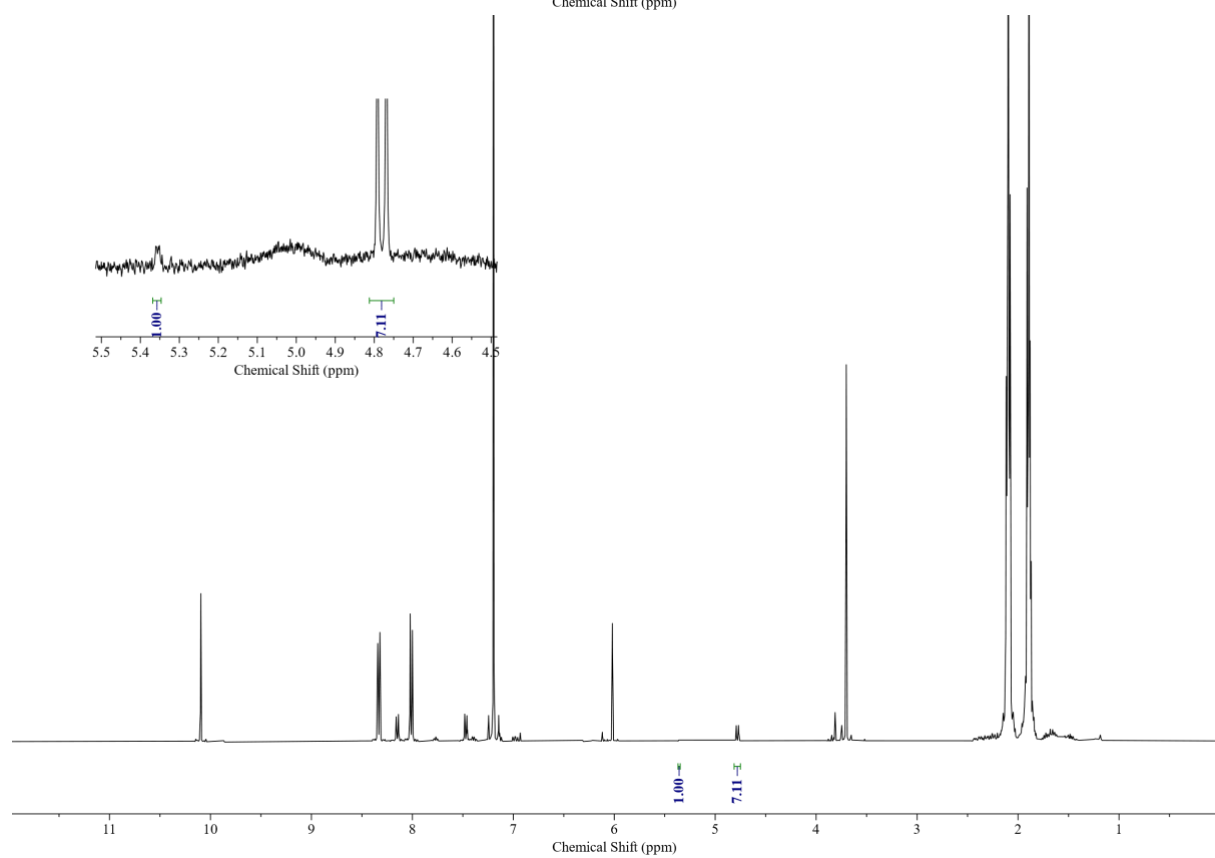

MeOH as a solvent:

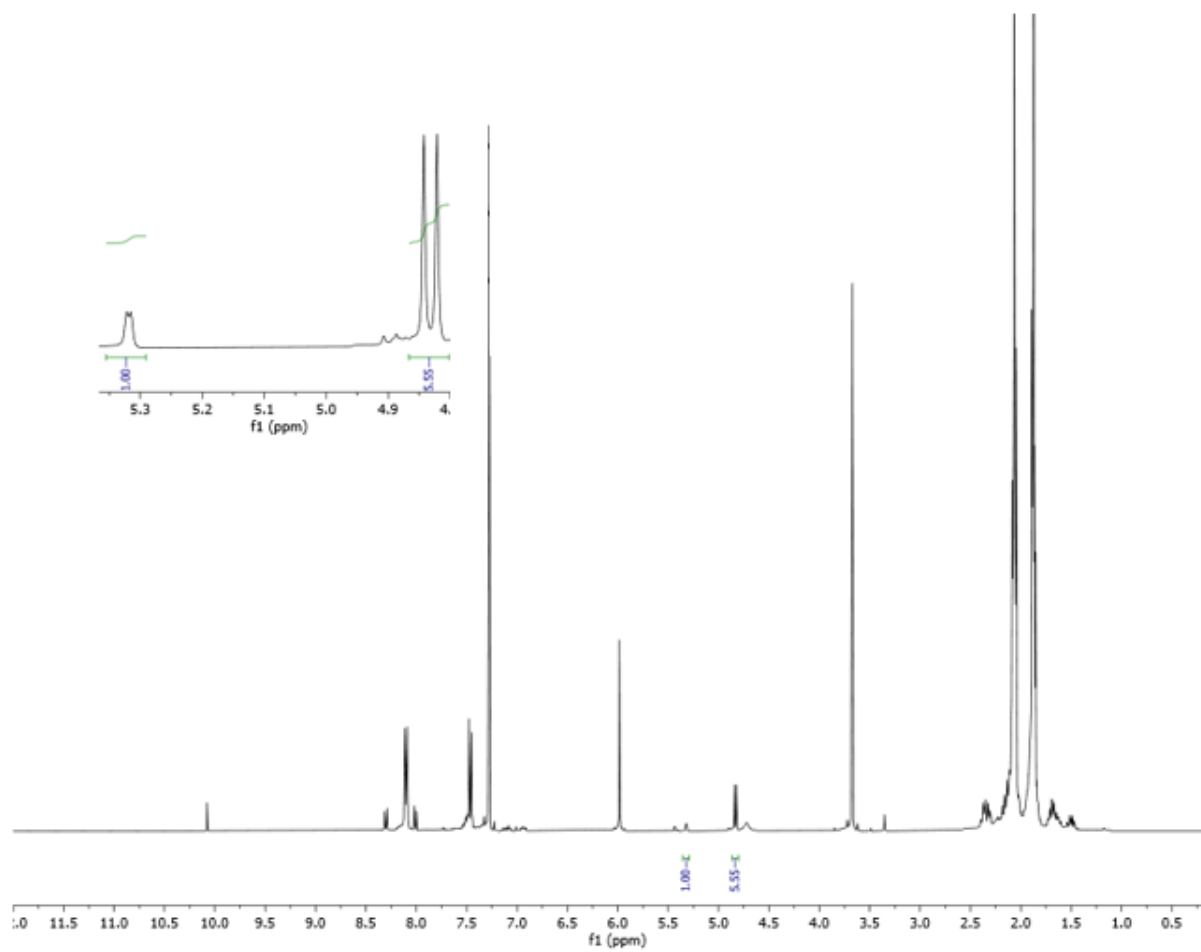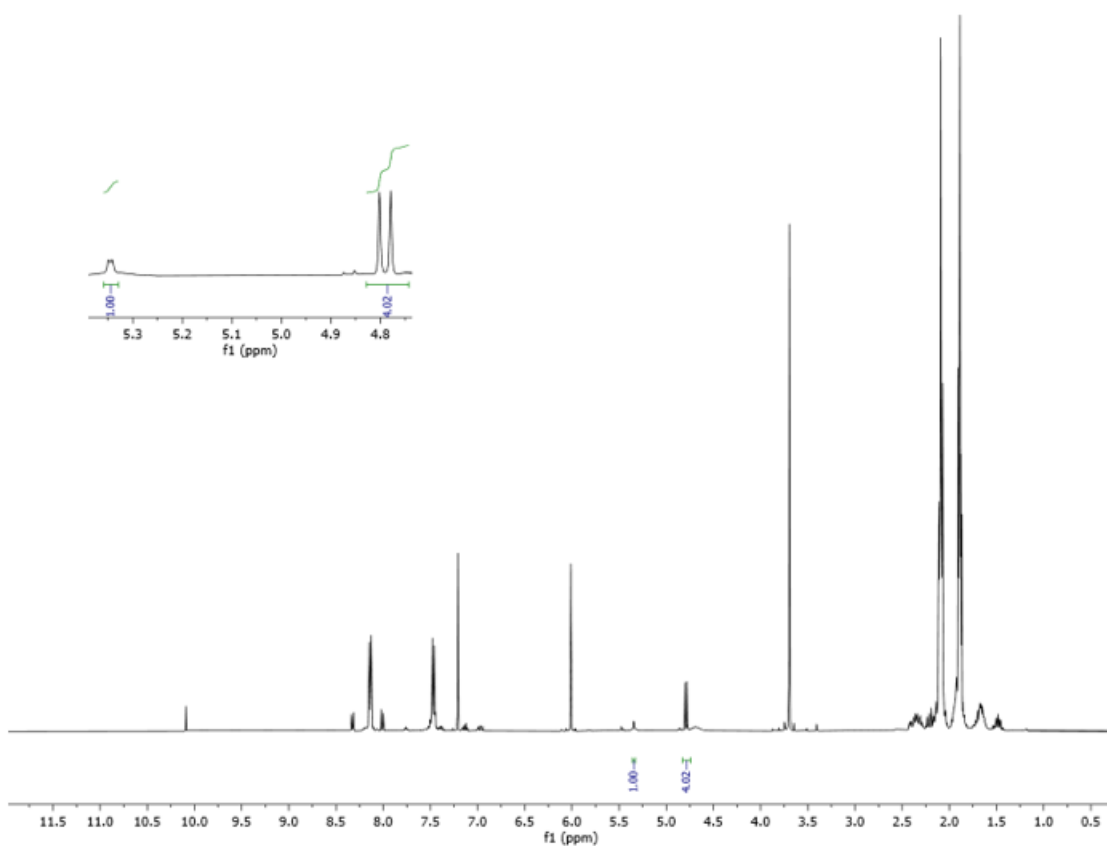

# 18.4 Time screening (table S3)

0.5 hour

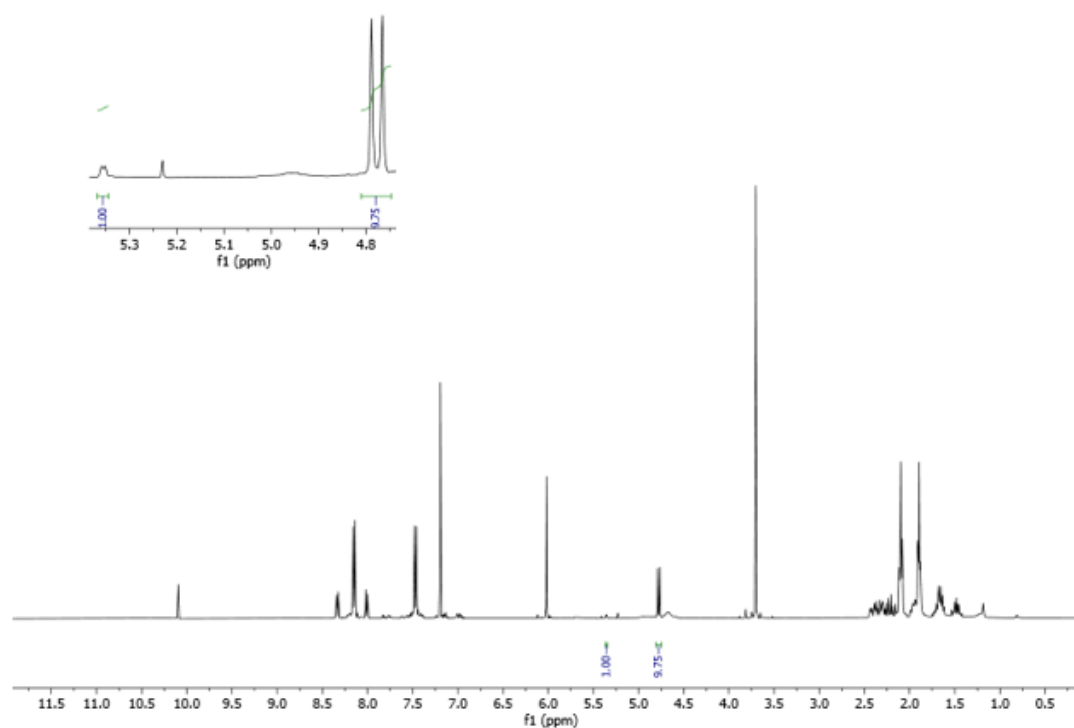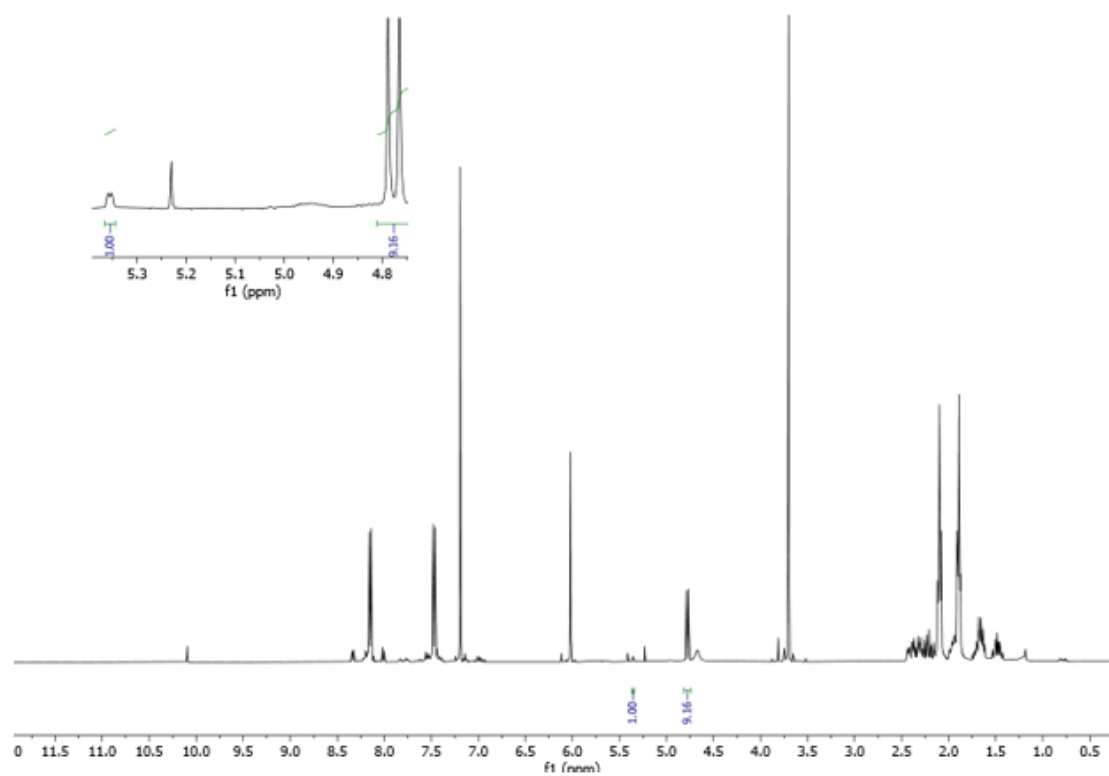

1 hour

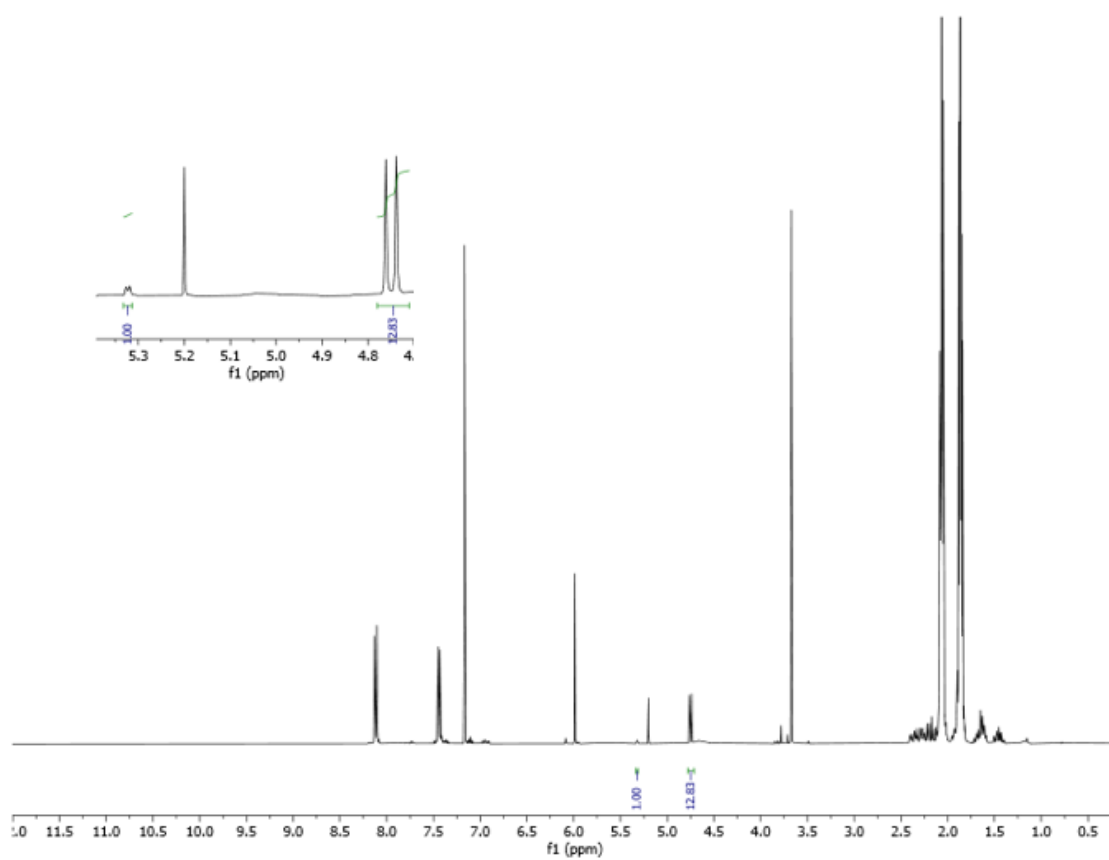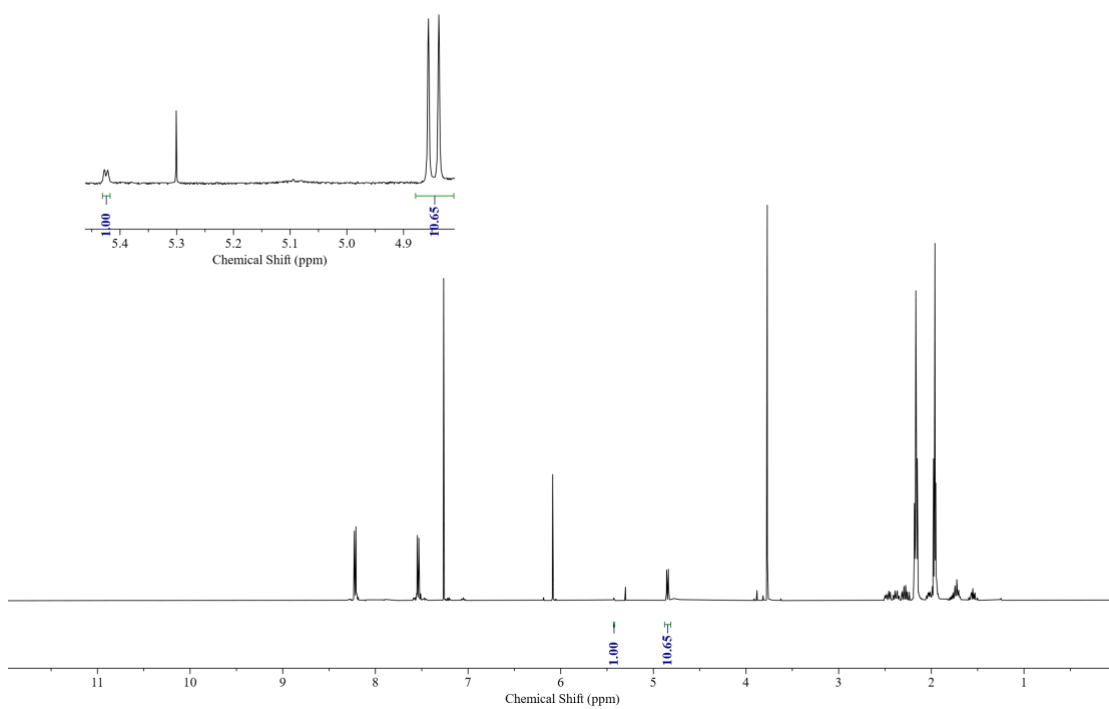

1 hour – No boronic acid

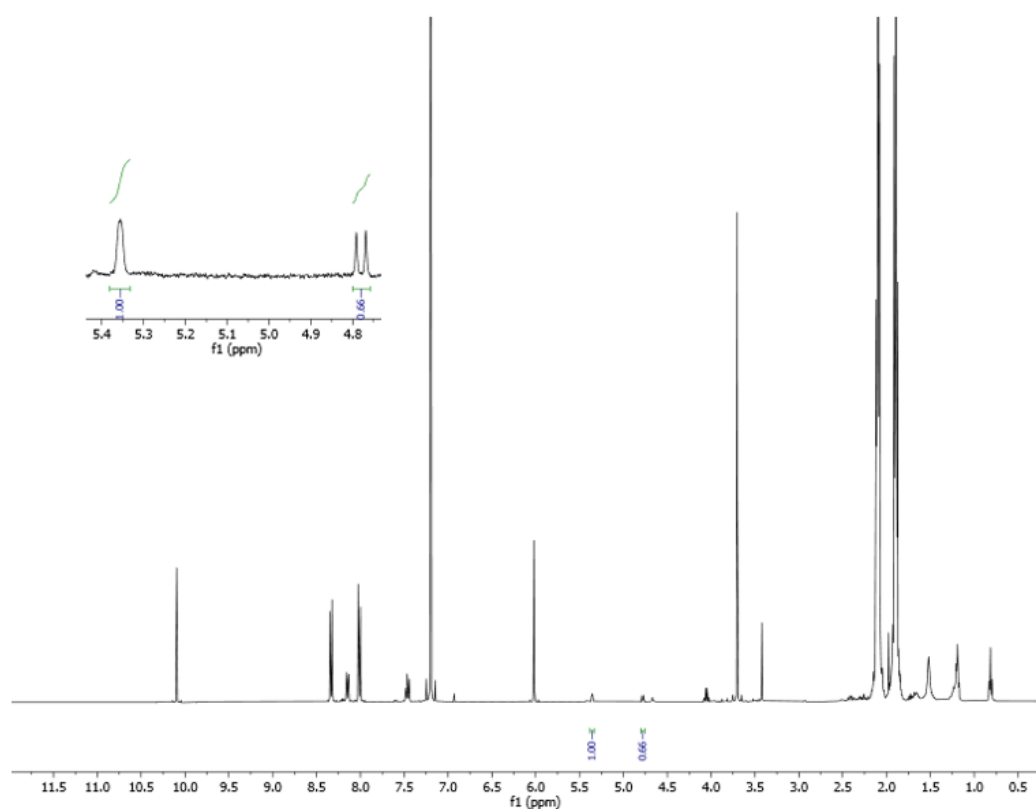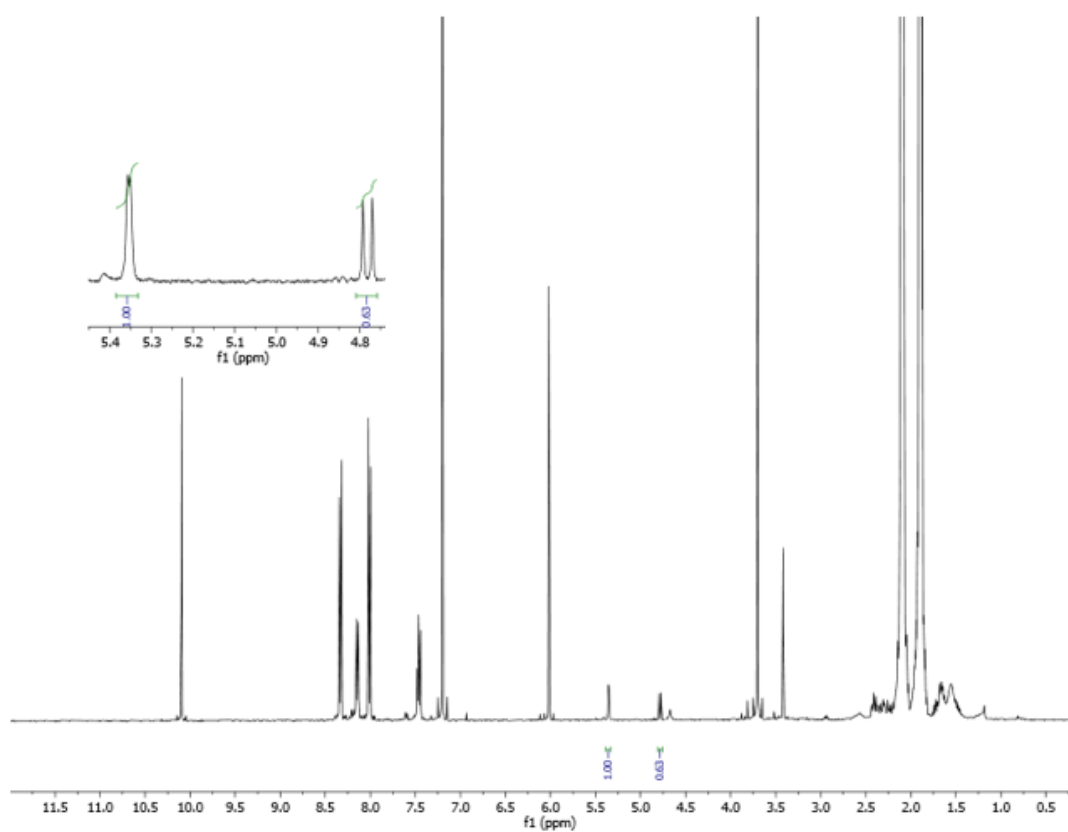



2 hours – with boronic acid

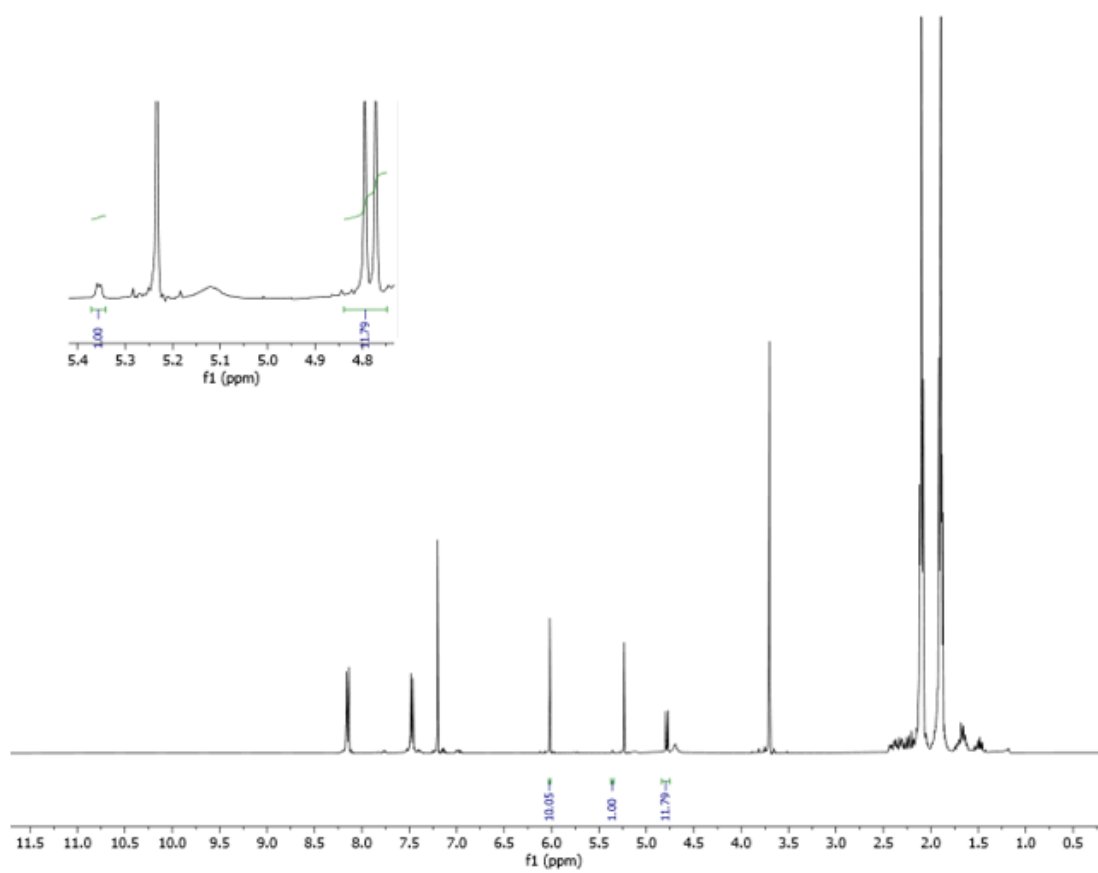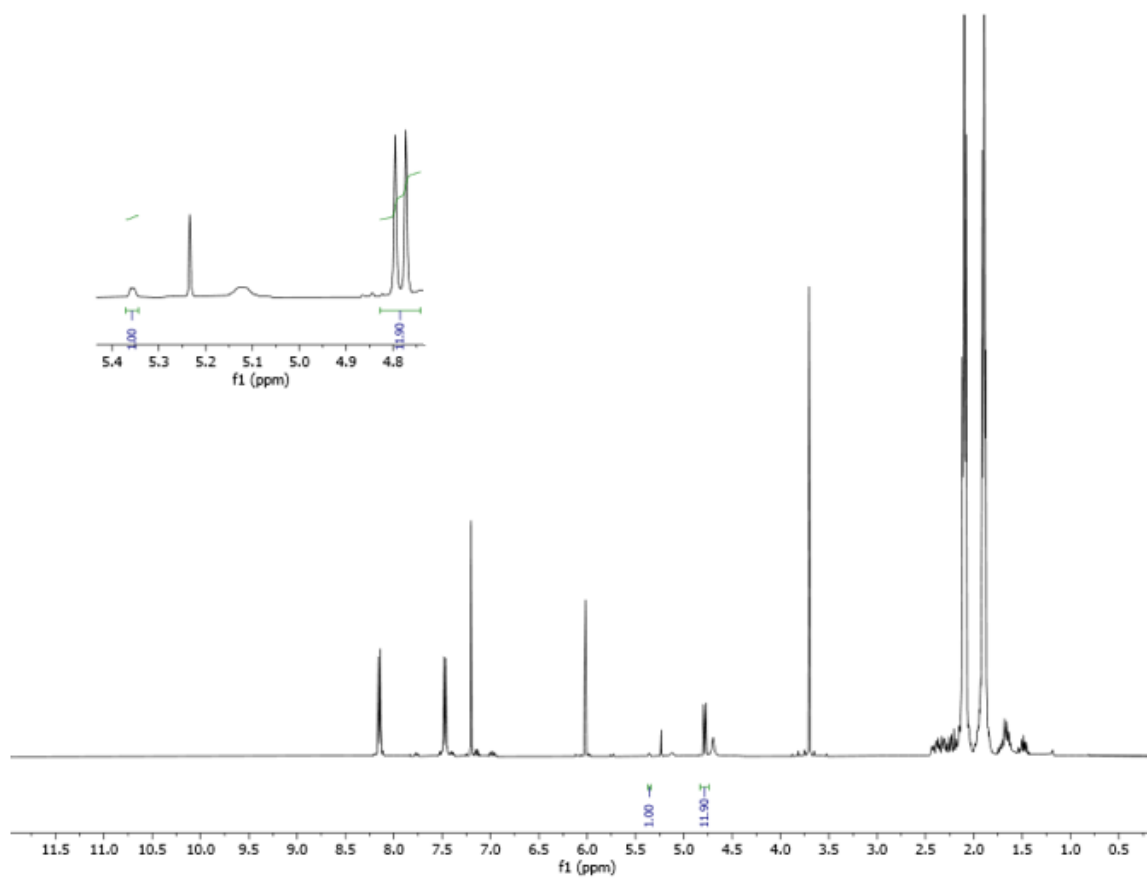

4 hours – with boronic acid

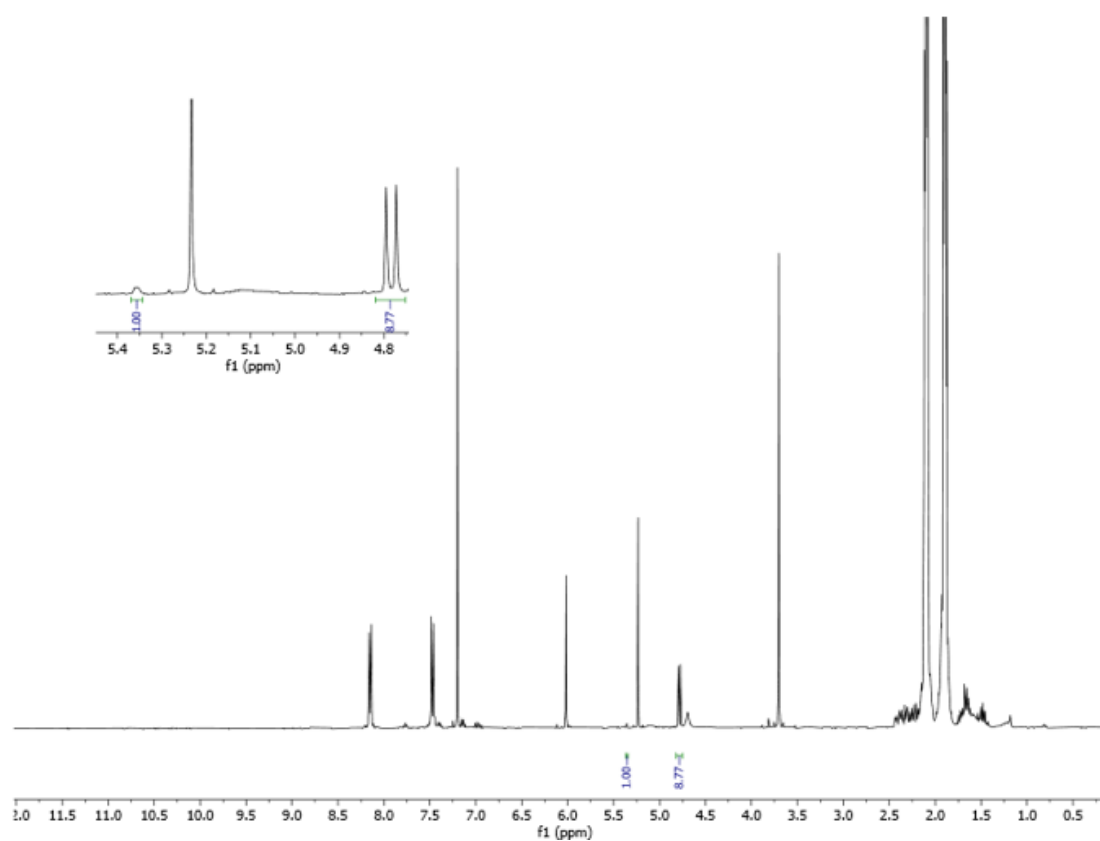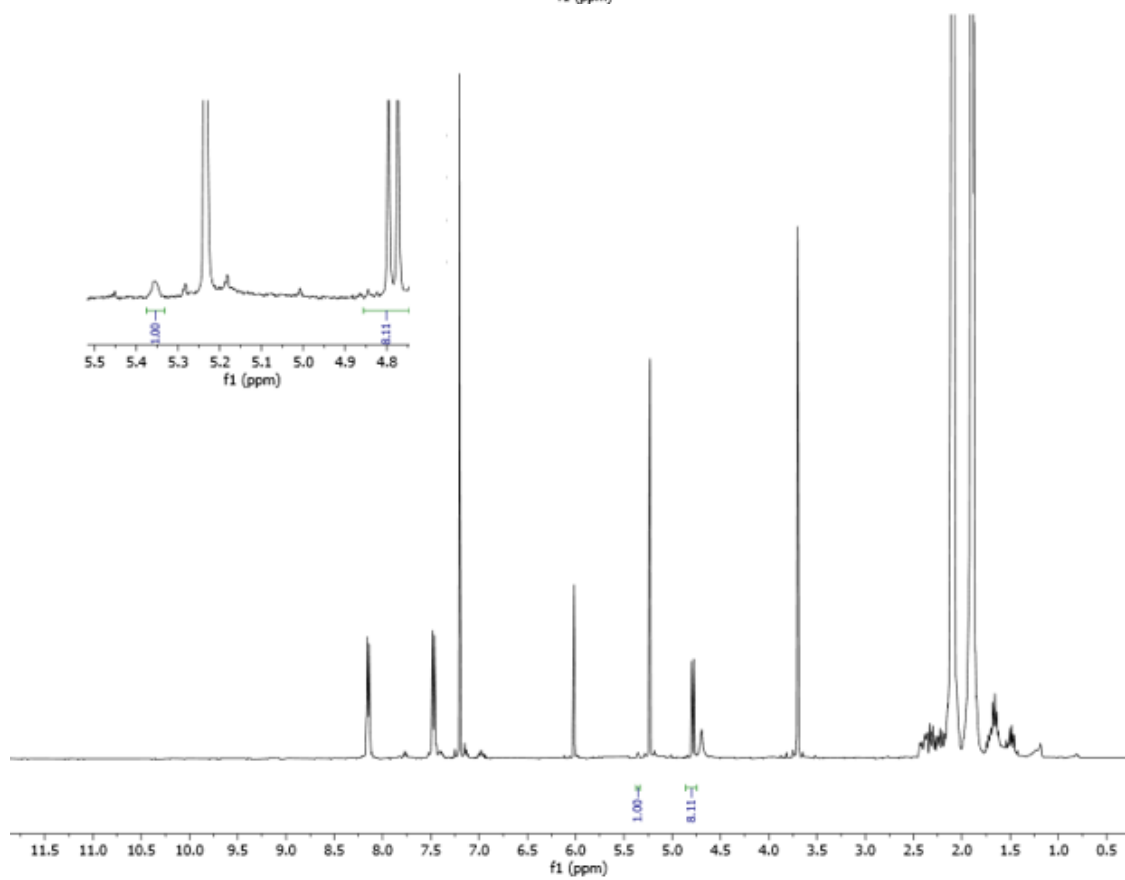

20 hours – with boronic acid

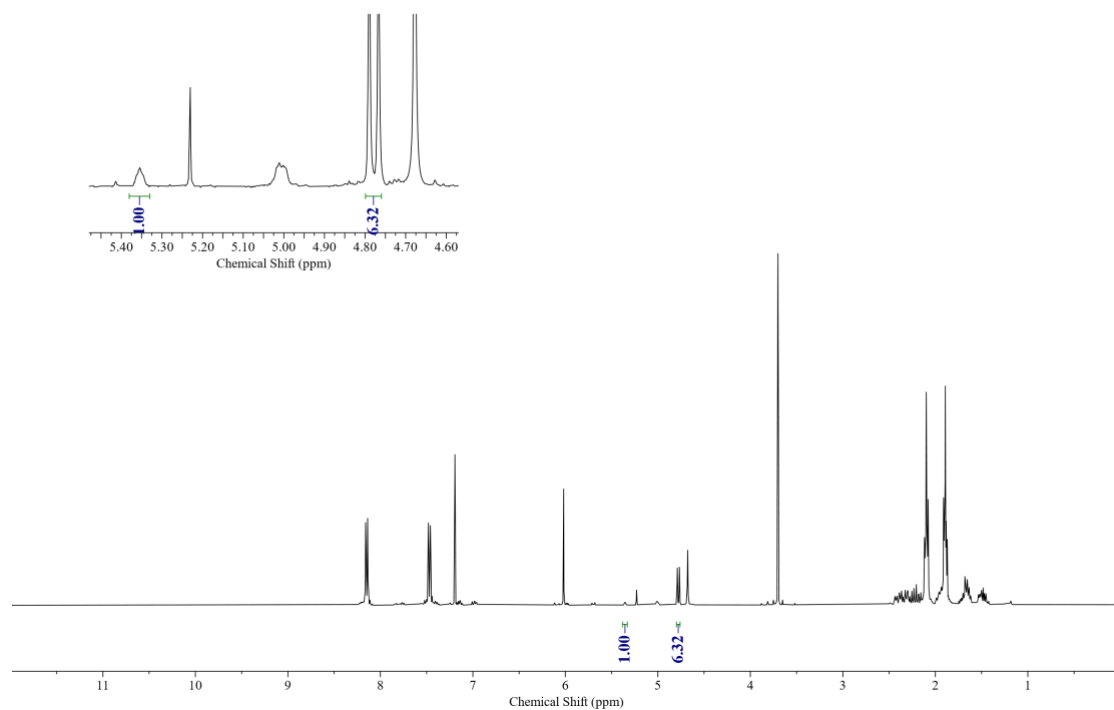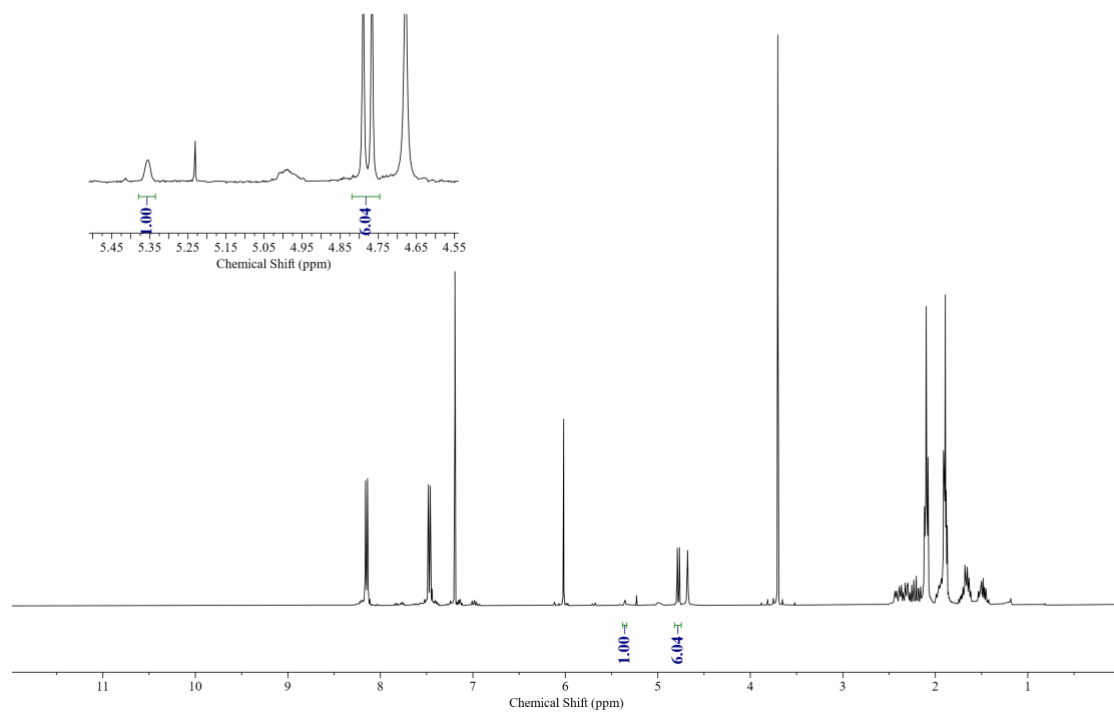

20 hours – without boronic acid

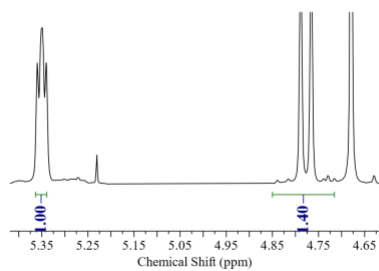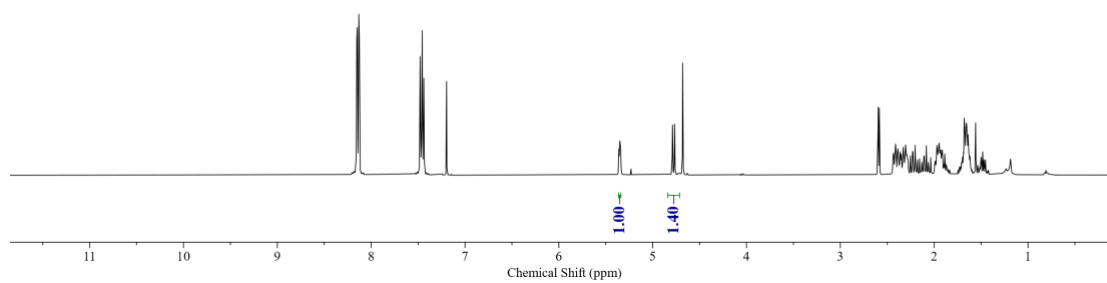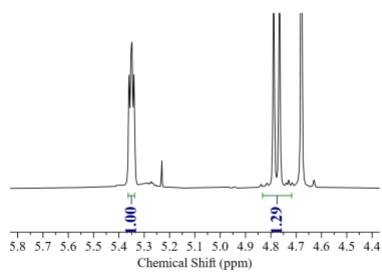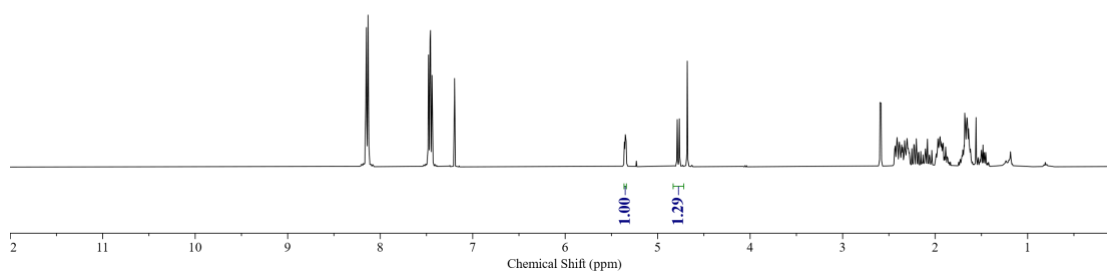

18.5 Water optimization (table S4)

0 mol%

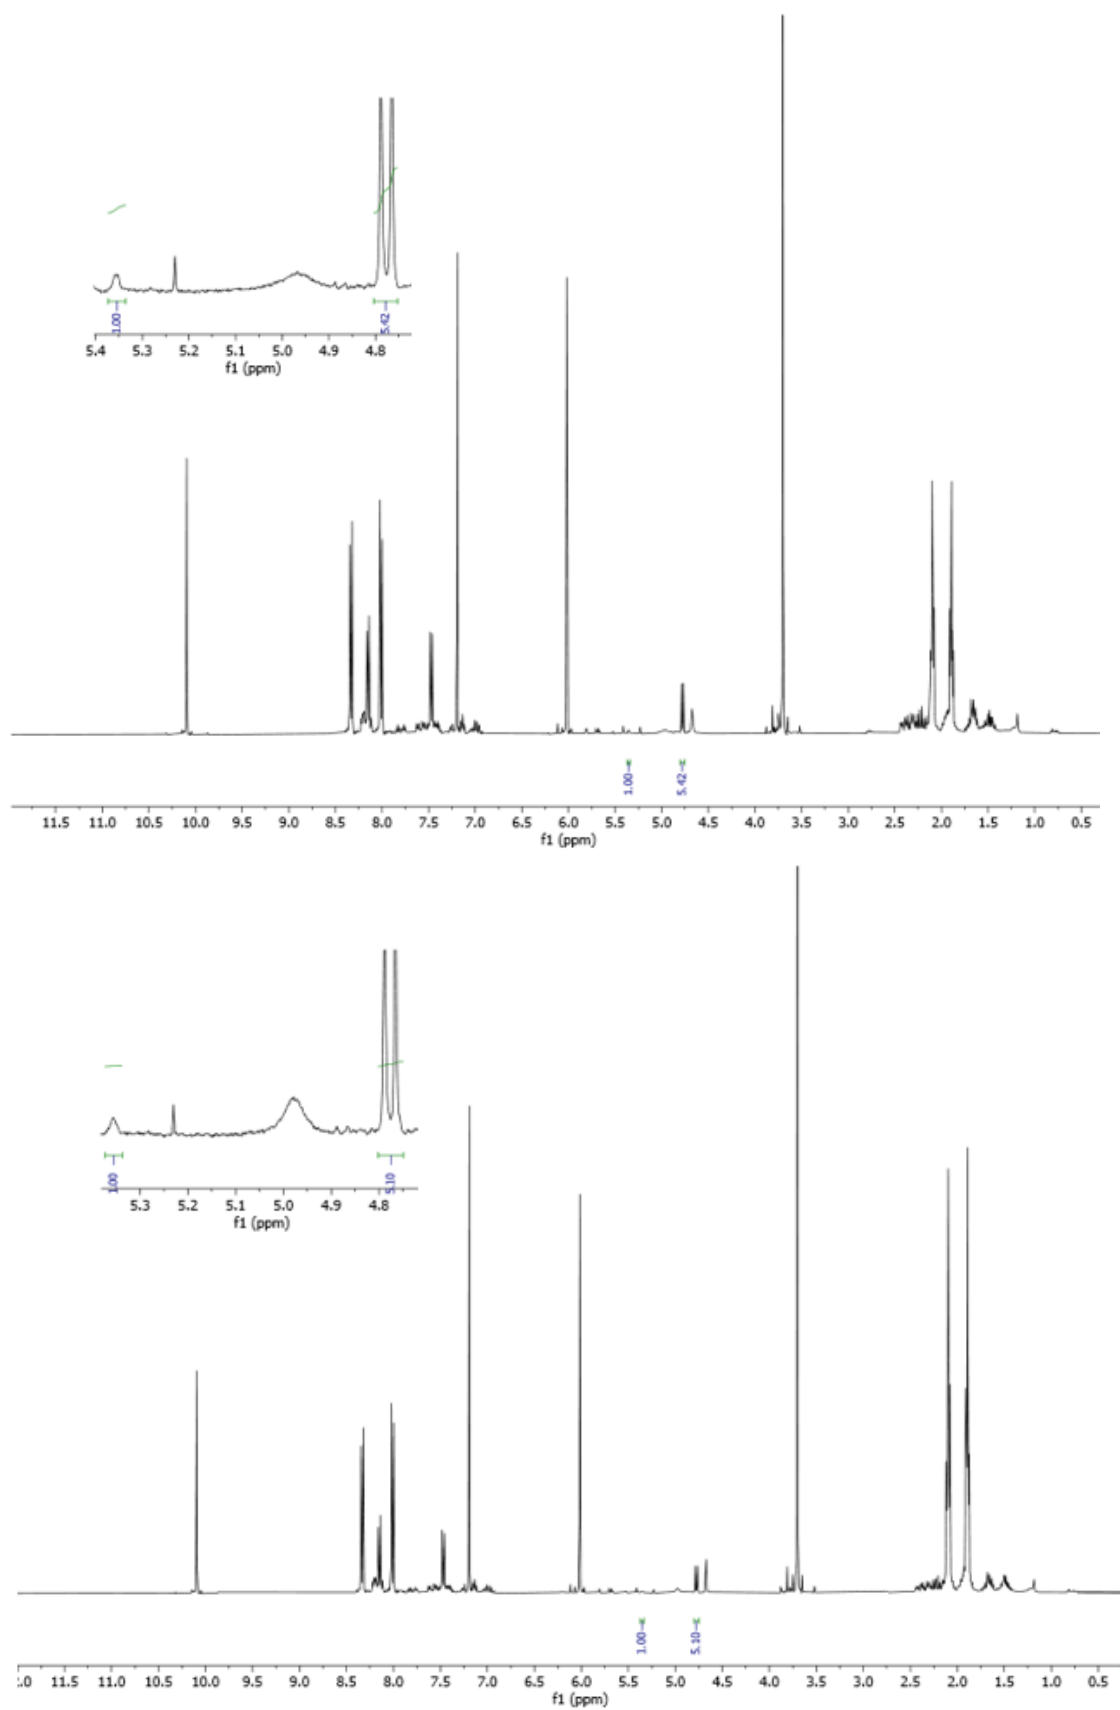

50 mol%

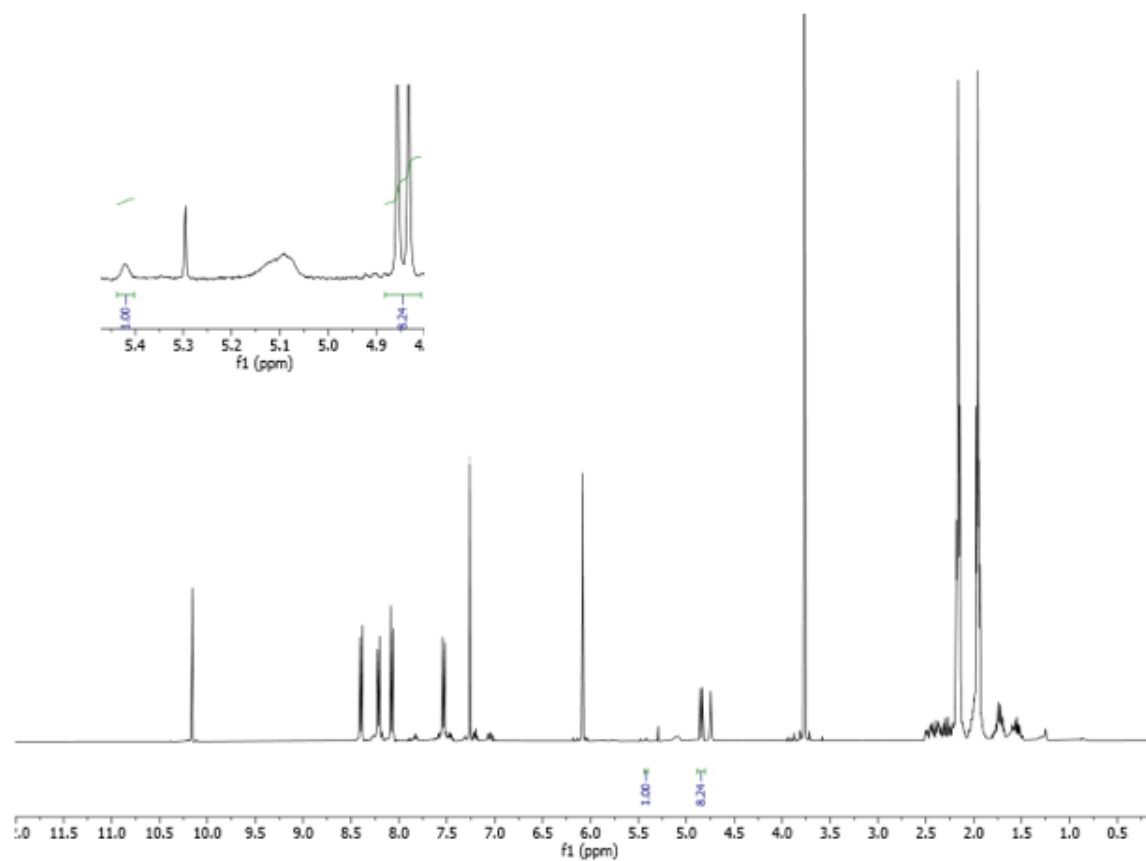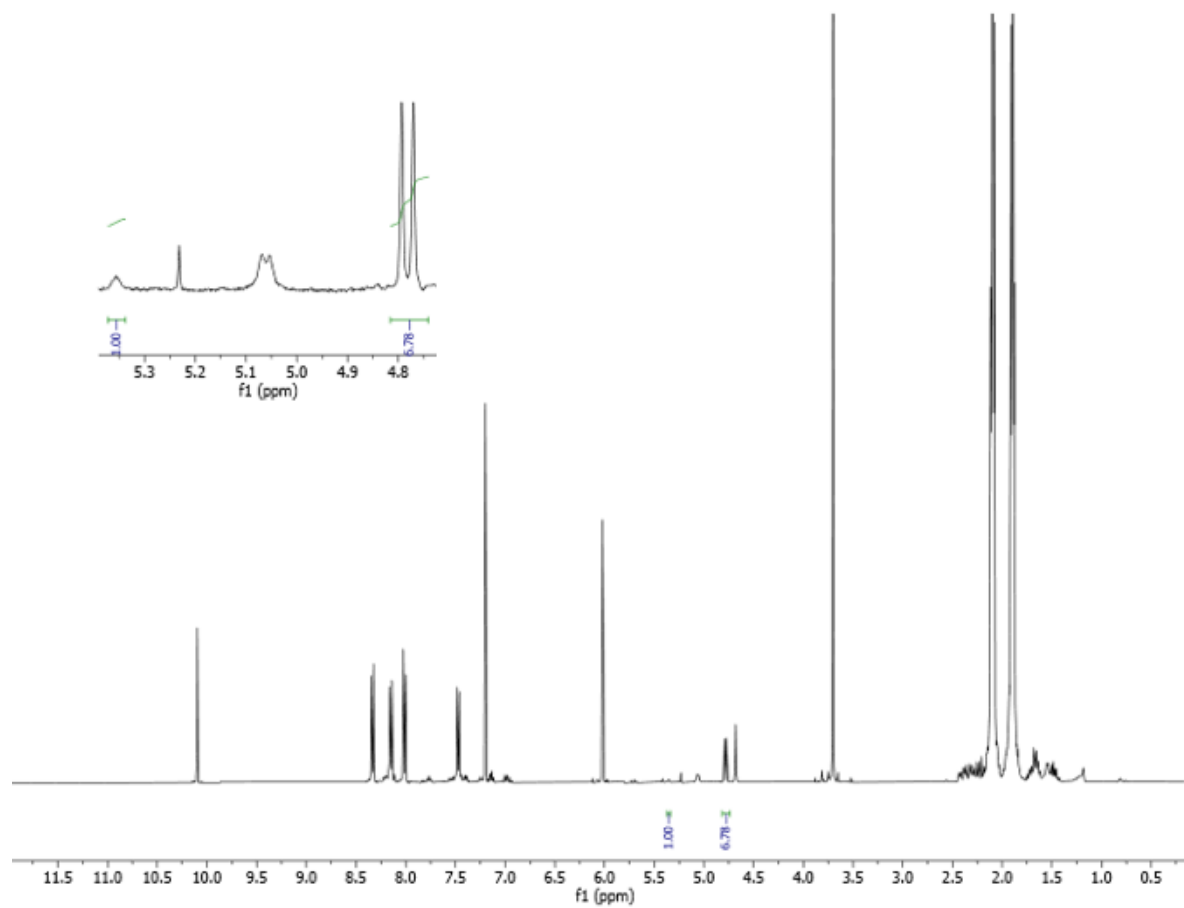

100 mol%

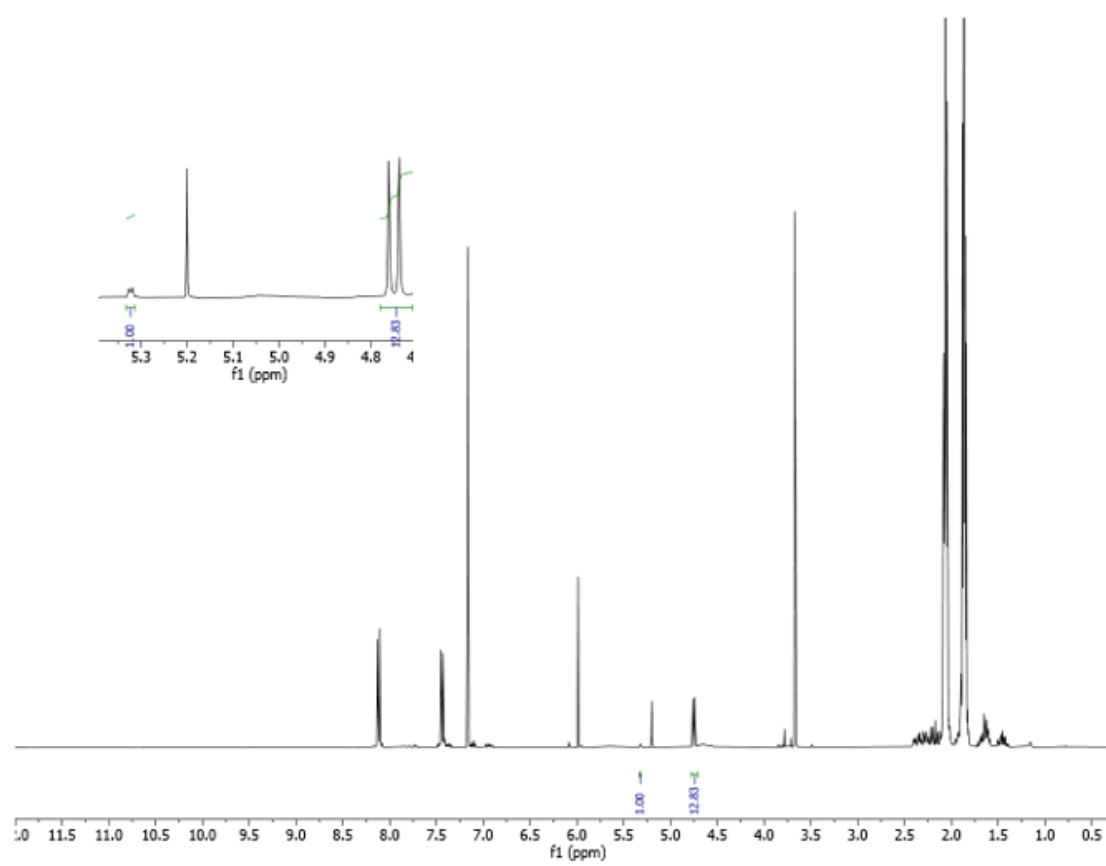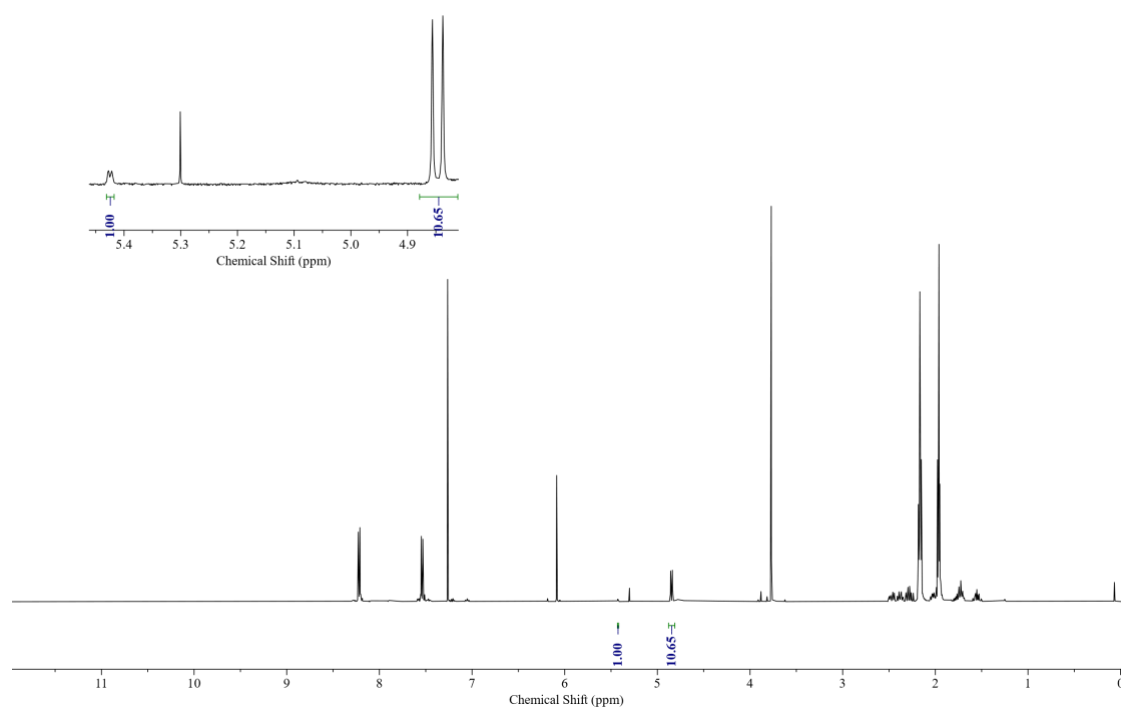

200 mol%

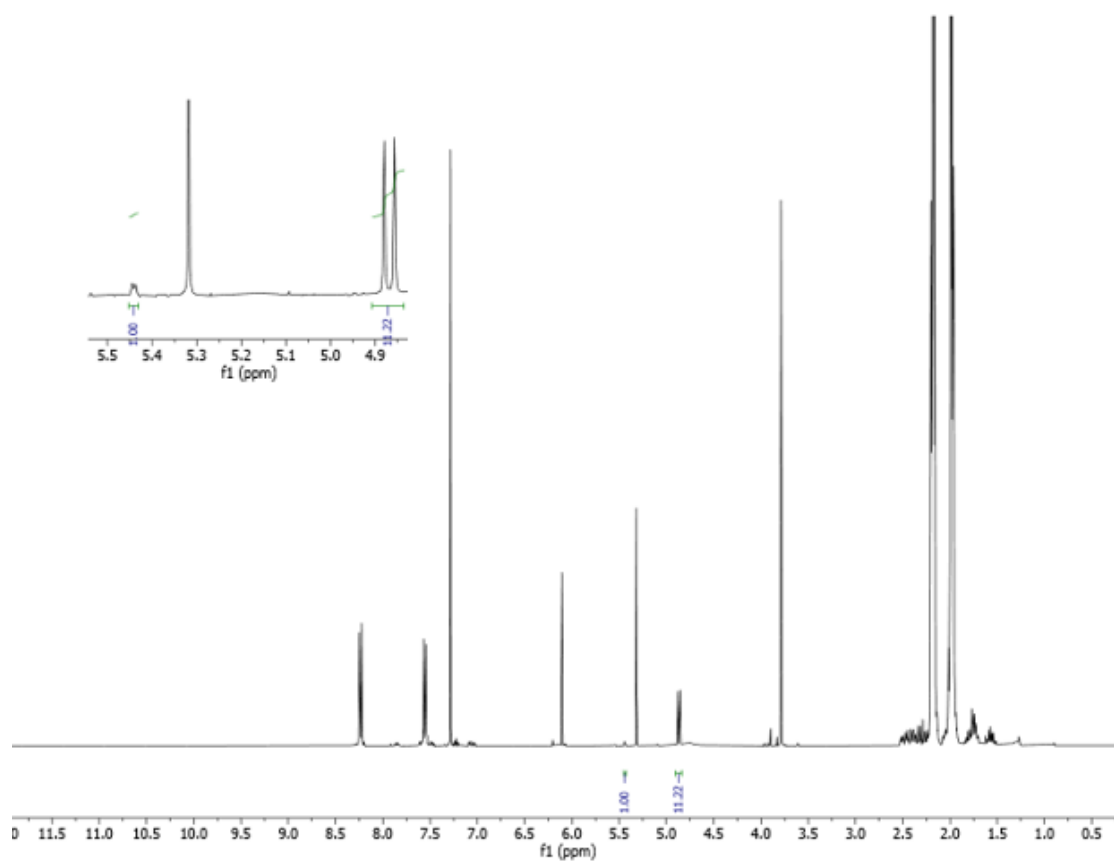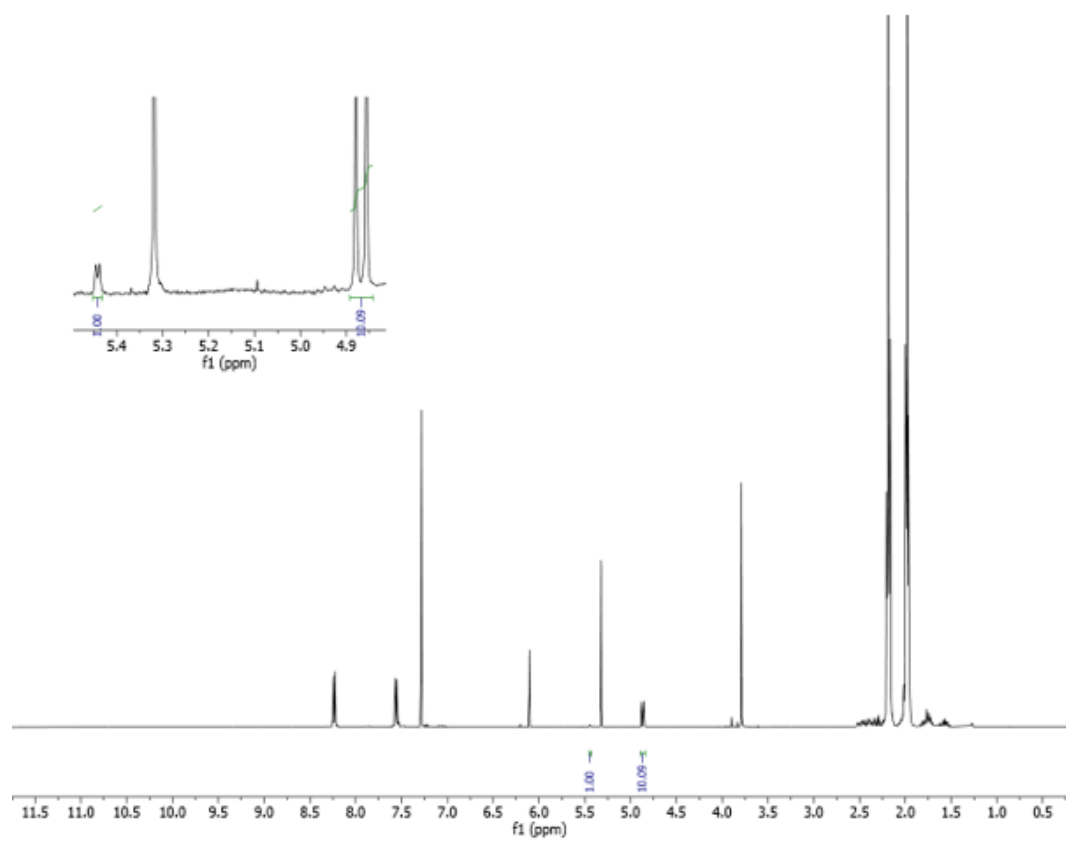



## 18.6 Water screening without molecular sieves (table S1)

22 mol%

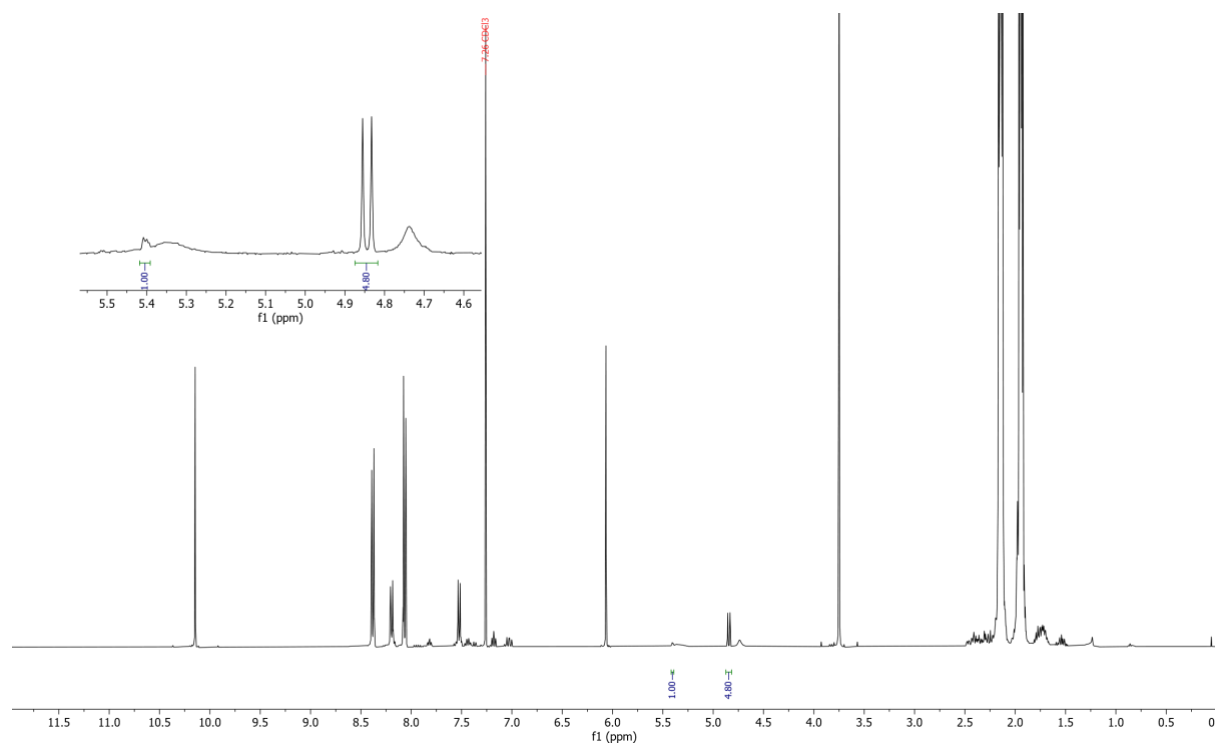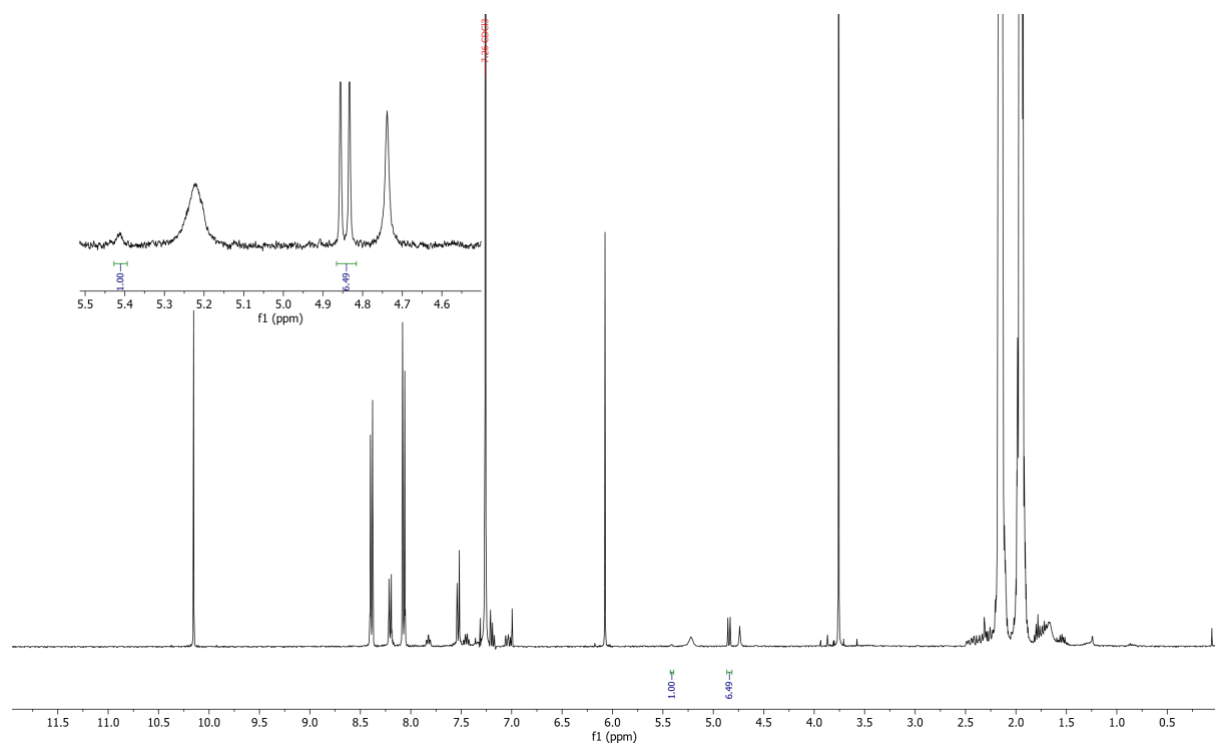

55 mol%

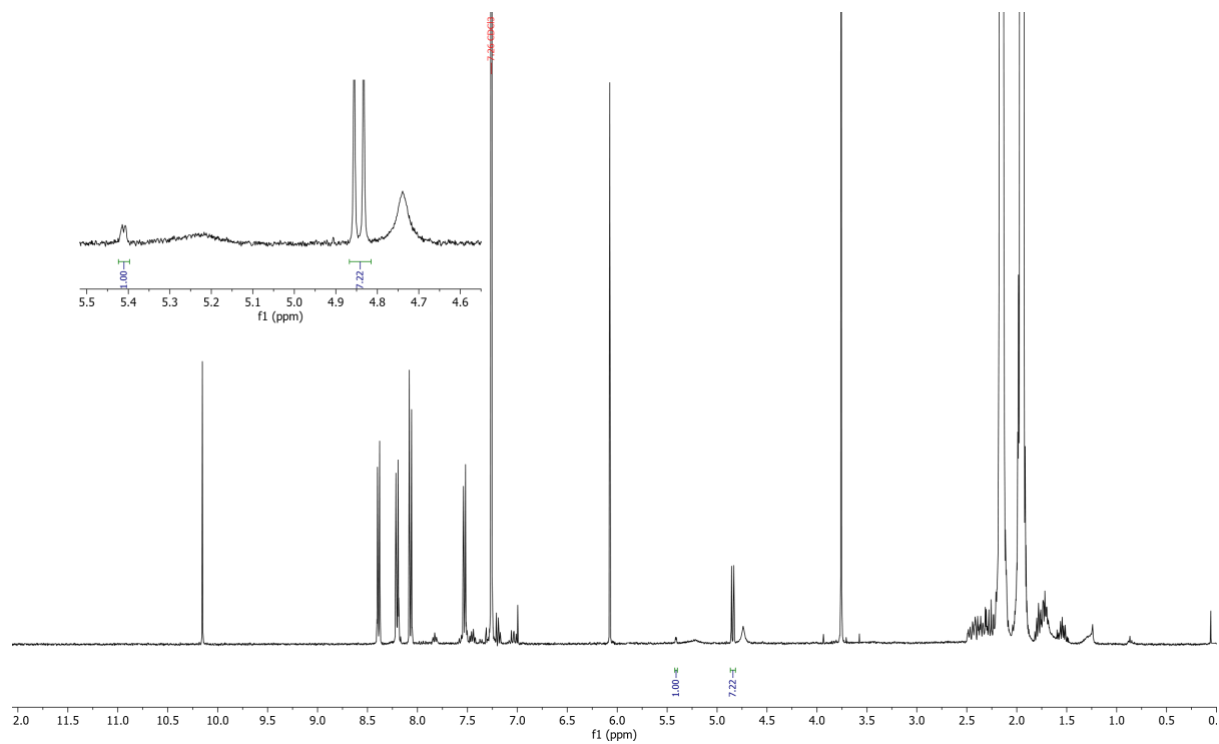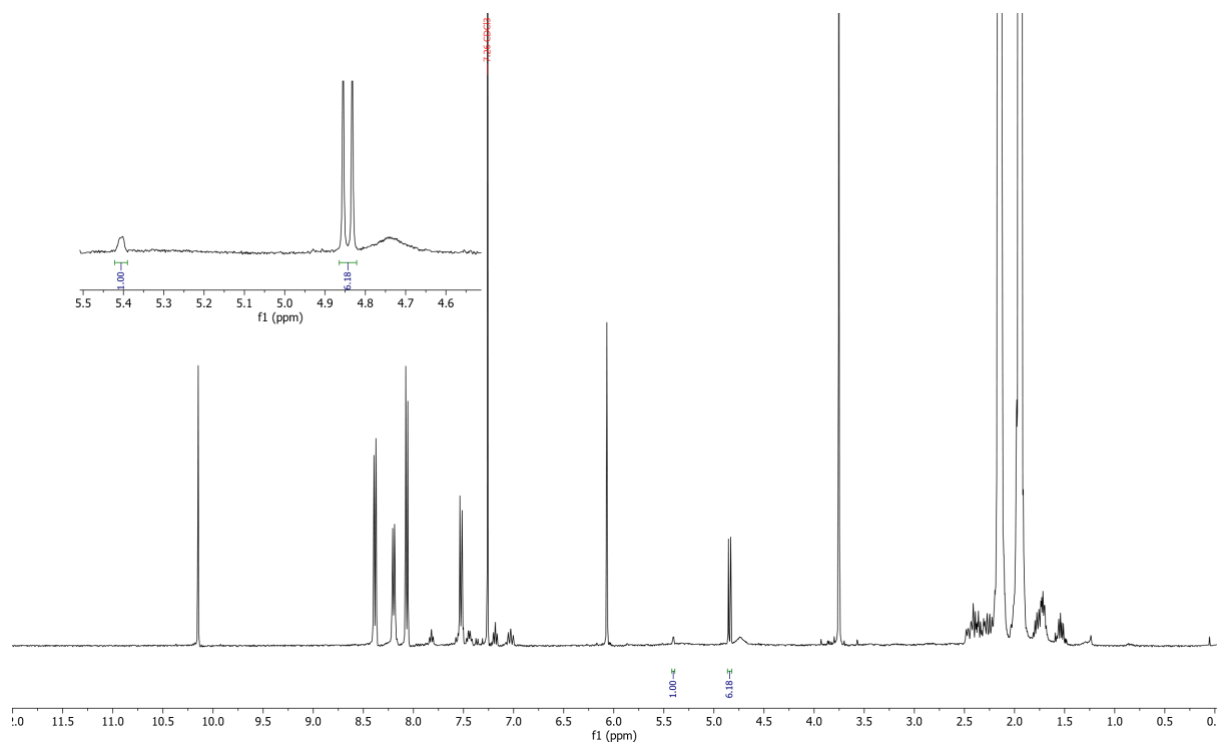

77 mol%

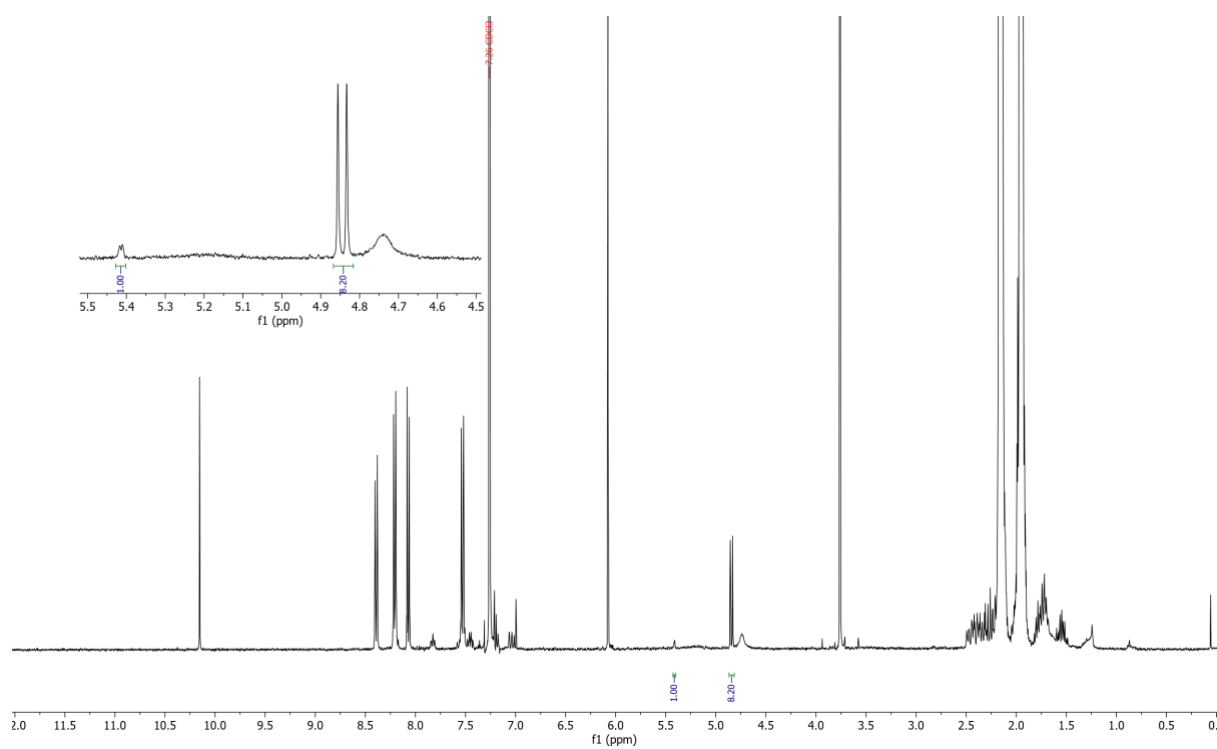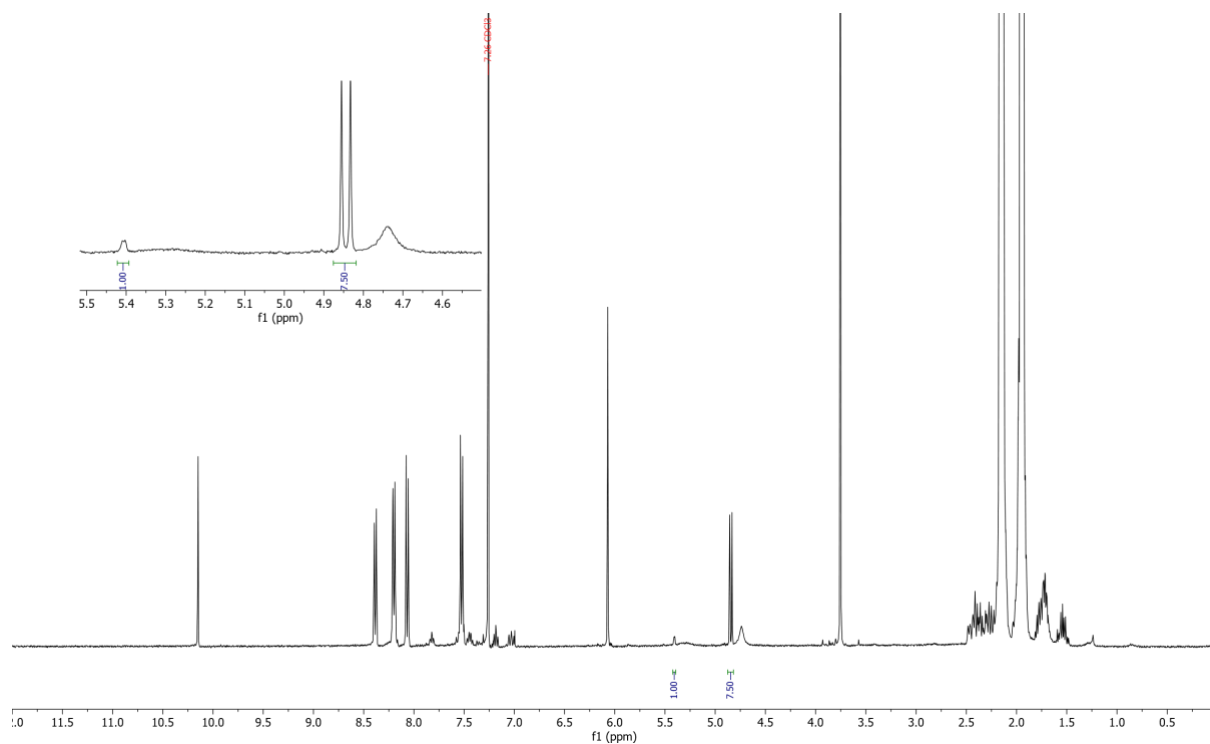

## 18.7 Screening molecular sieves size (table S1)

### 4 angstrom molecular sieves

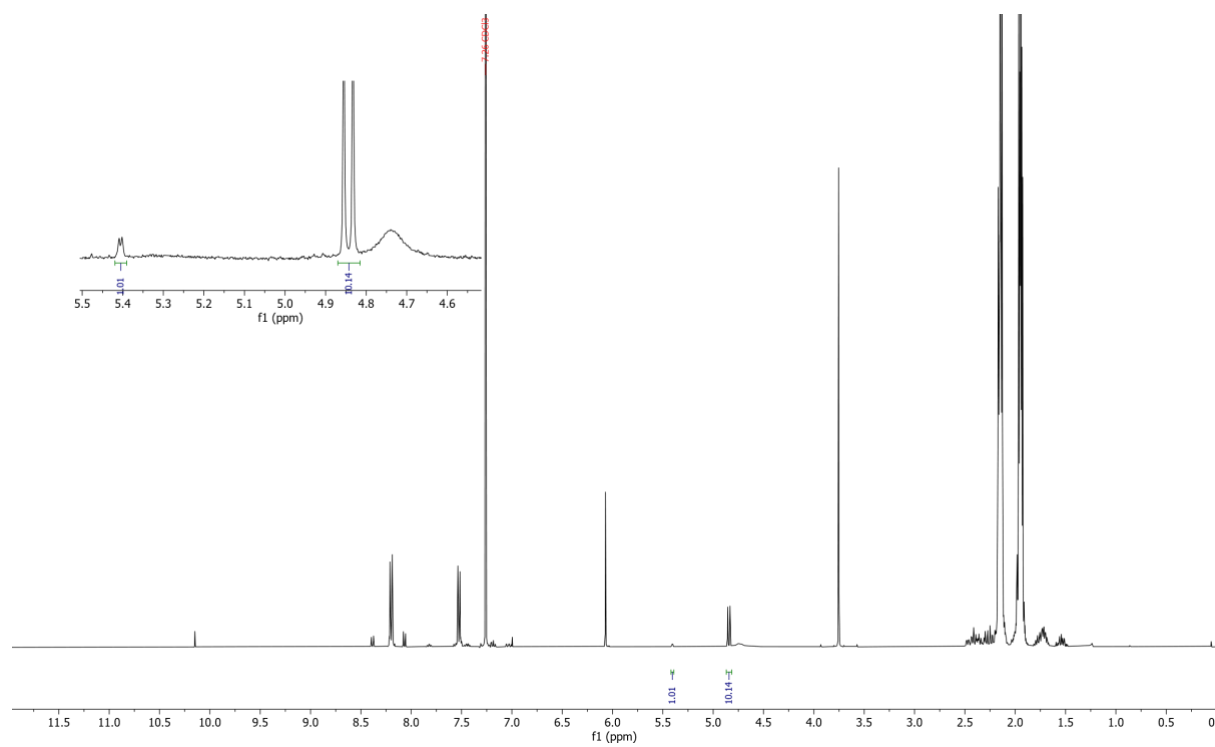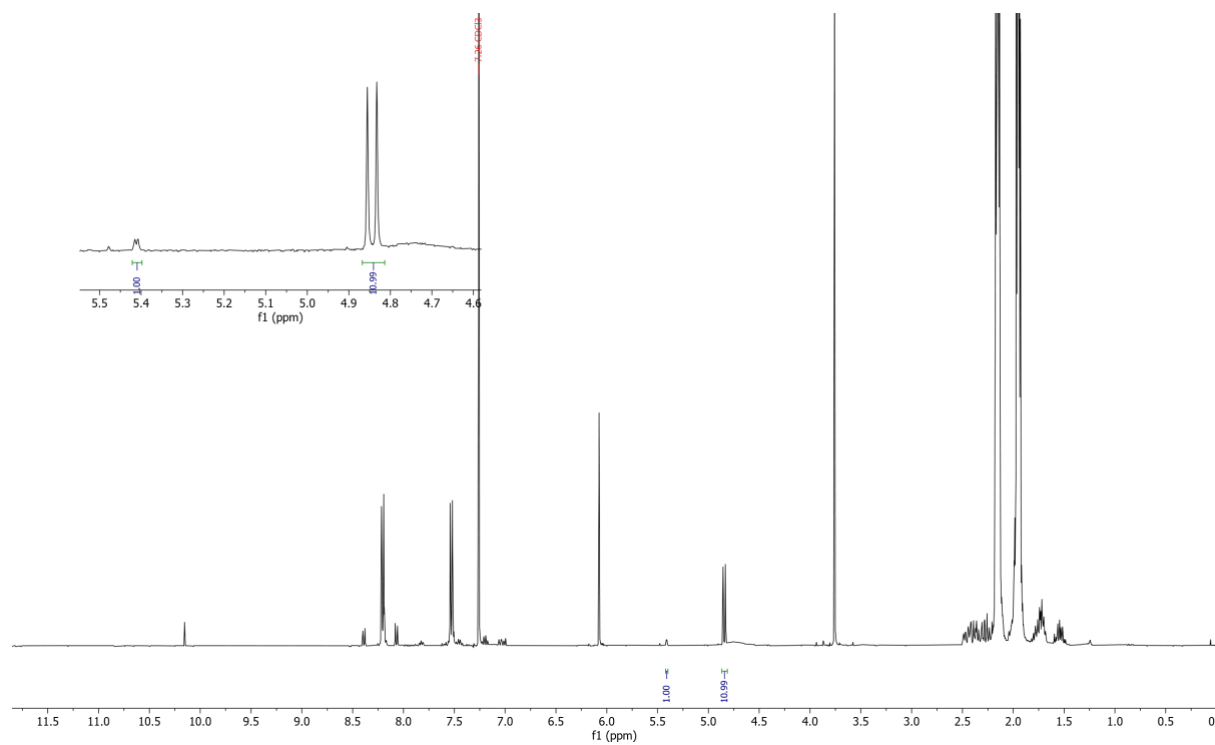

# 5 angstrom molecular sieves

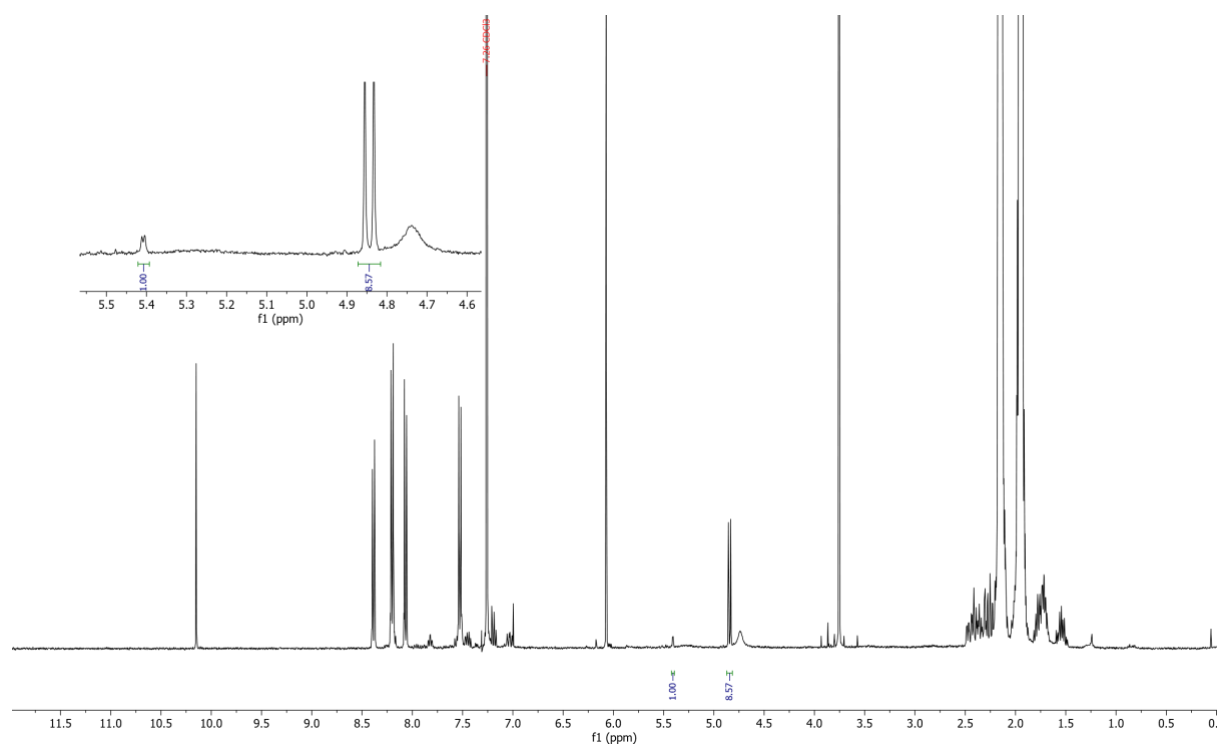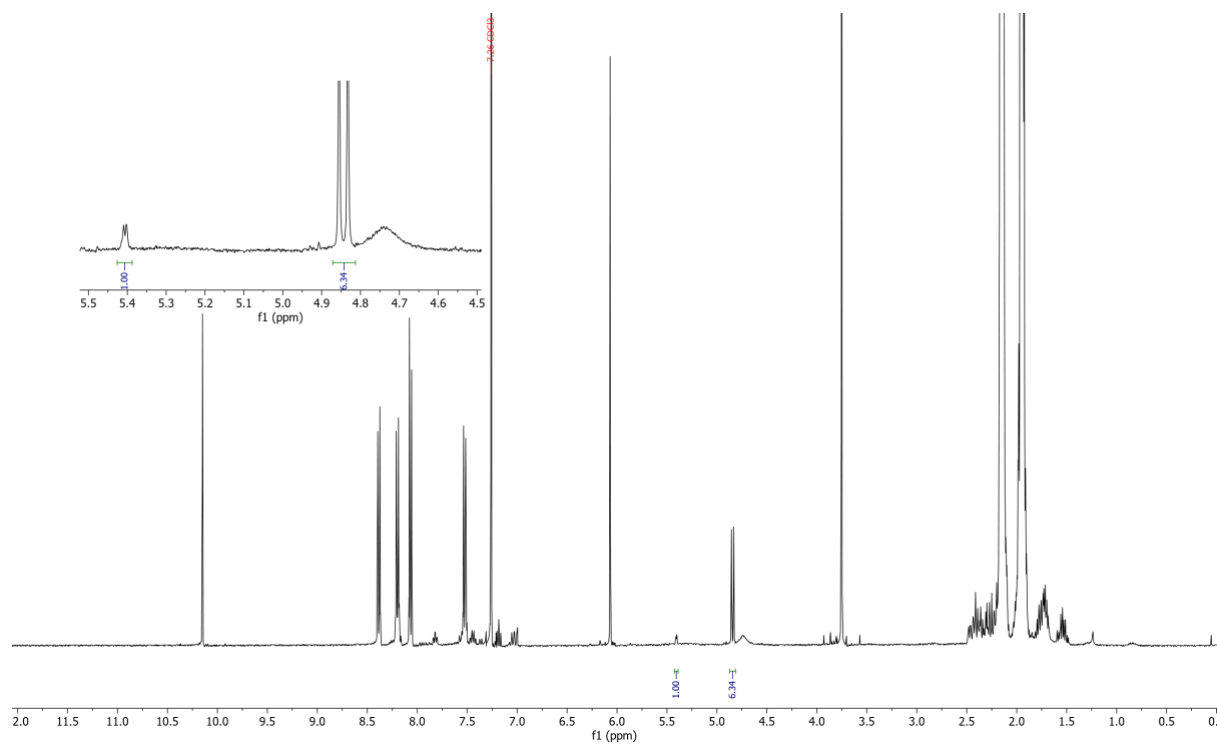

18.8 additional control experiments (table S1)

No molecular sieves, 100 mol% H<sub>2</sub>O, 100 mol% KCl<sub>(S)</sub>

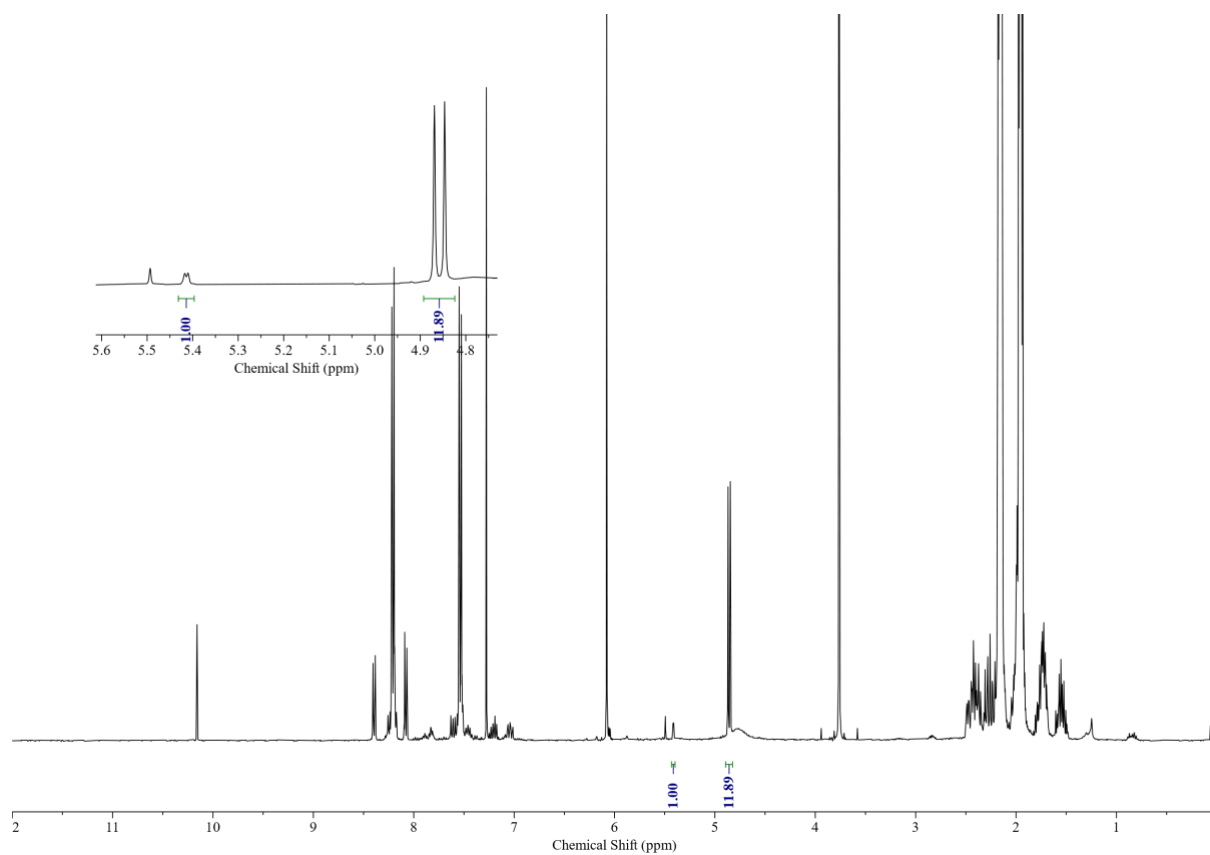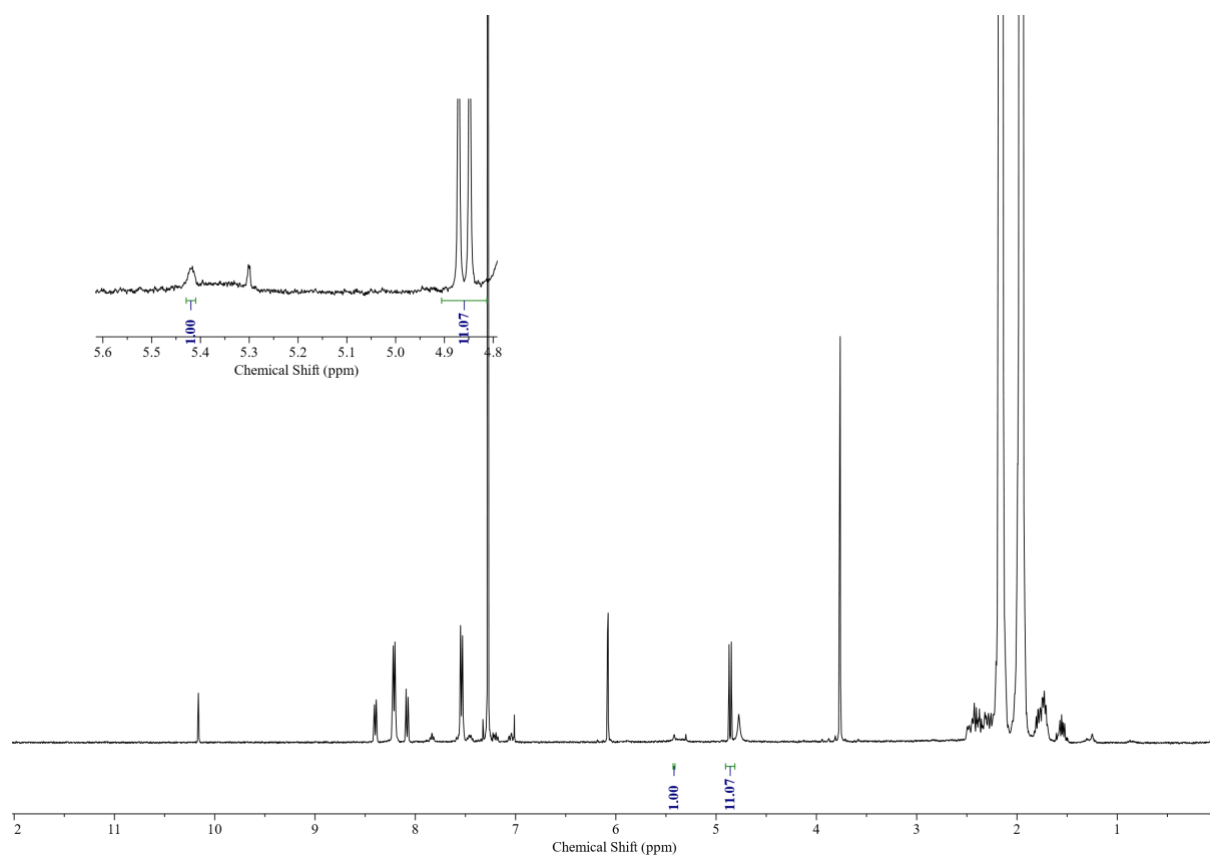

No molecular sieves, 100 mol% H<sub>2</sub>O, 10 mol% 2,6-lutidine

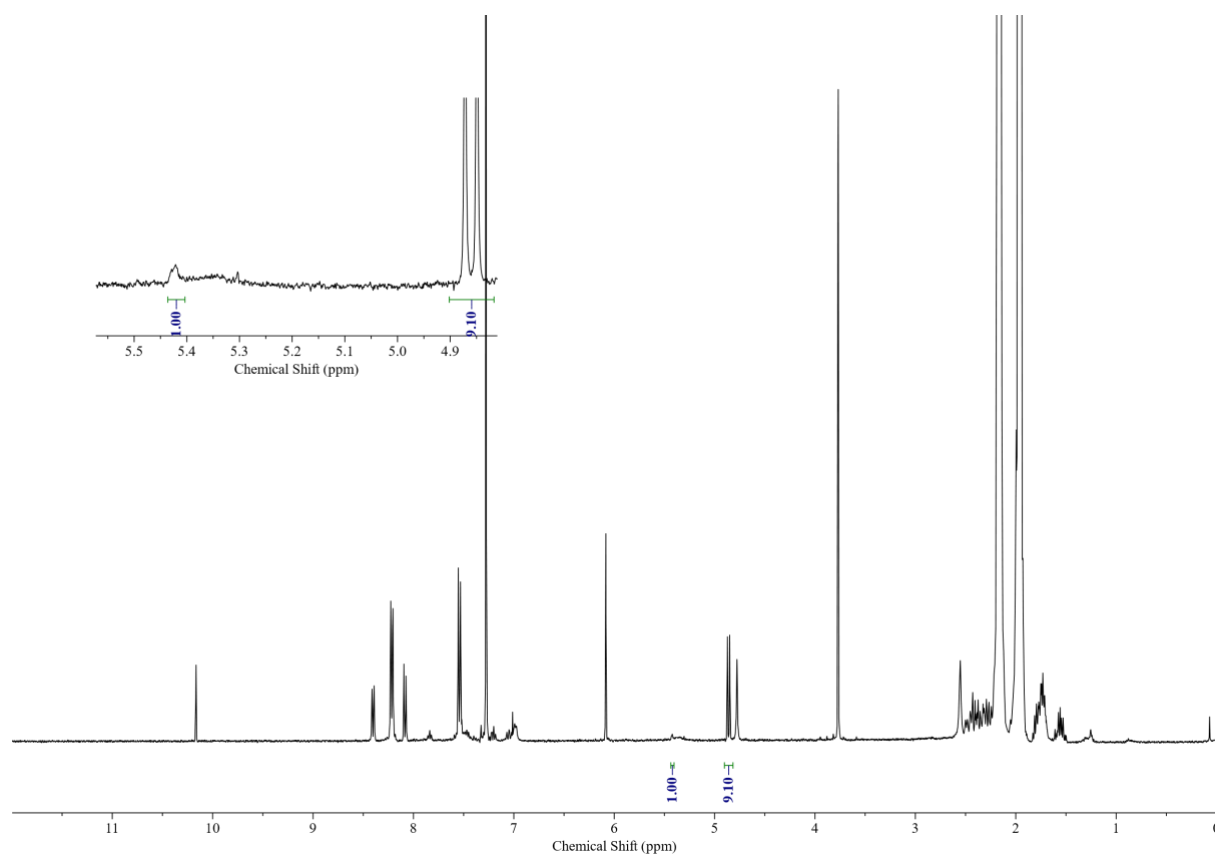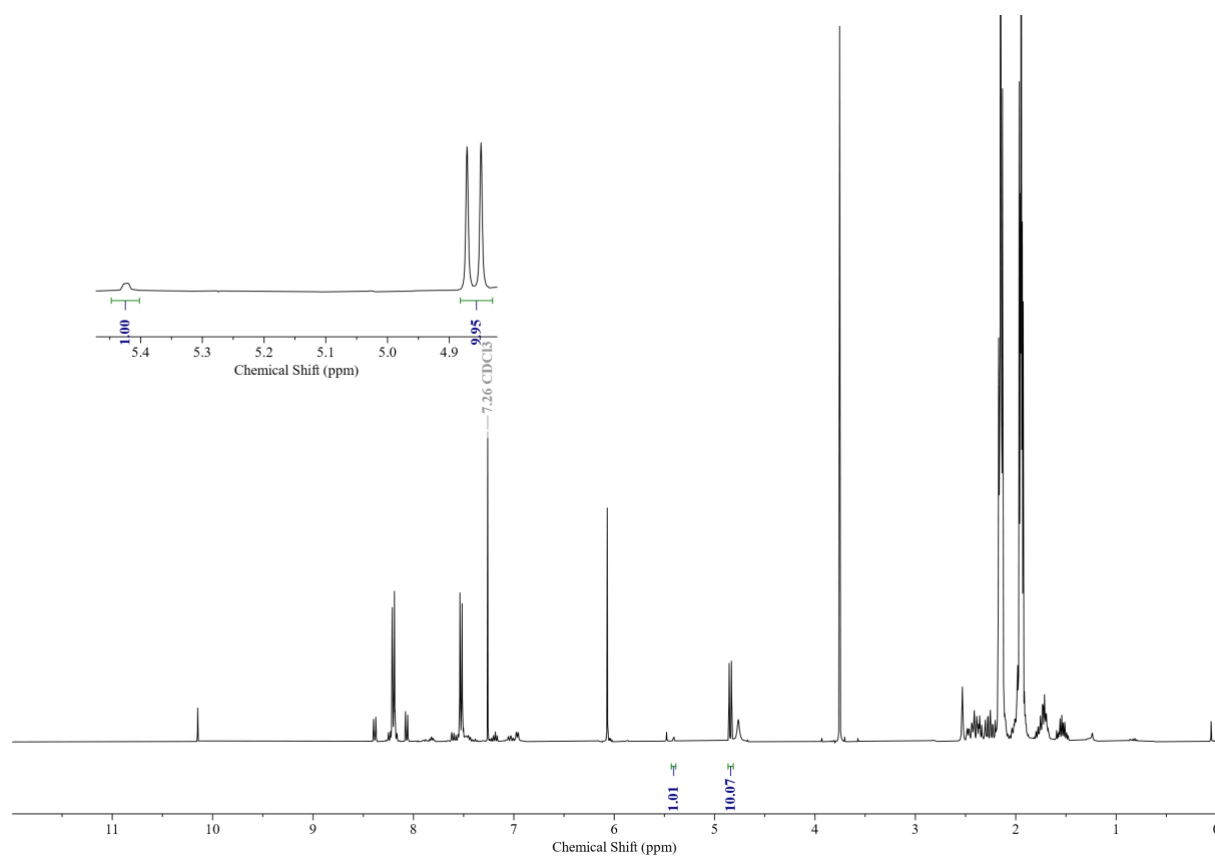

No molecular sieves, 100 mol% H<sub>2</sub>O, 10 mol% KHCO<sub>3(s)</sub>

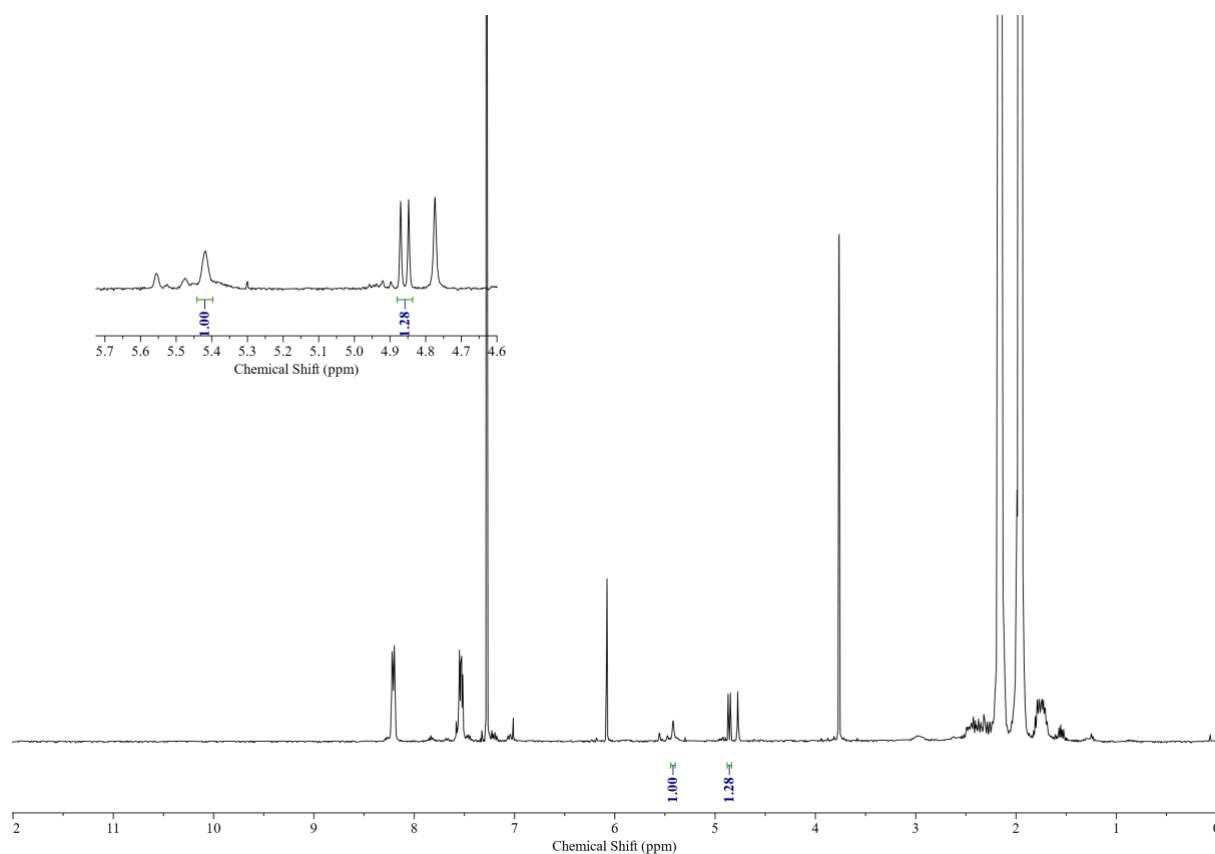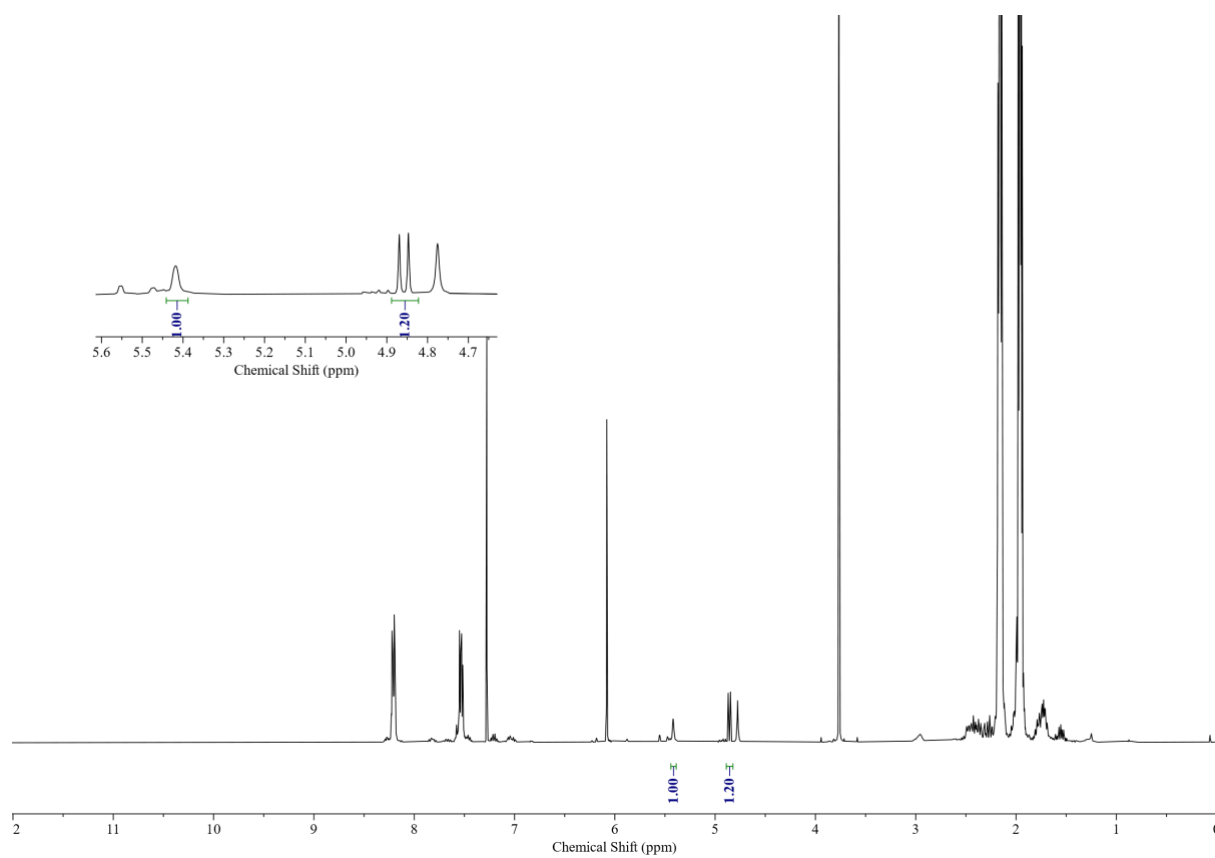



## 18.9 boronic acid screening (table S5)

### 3-F phenylboronic acid

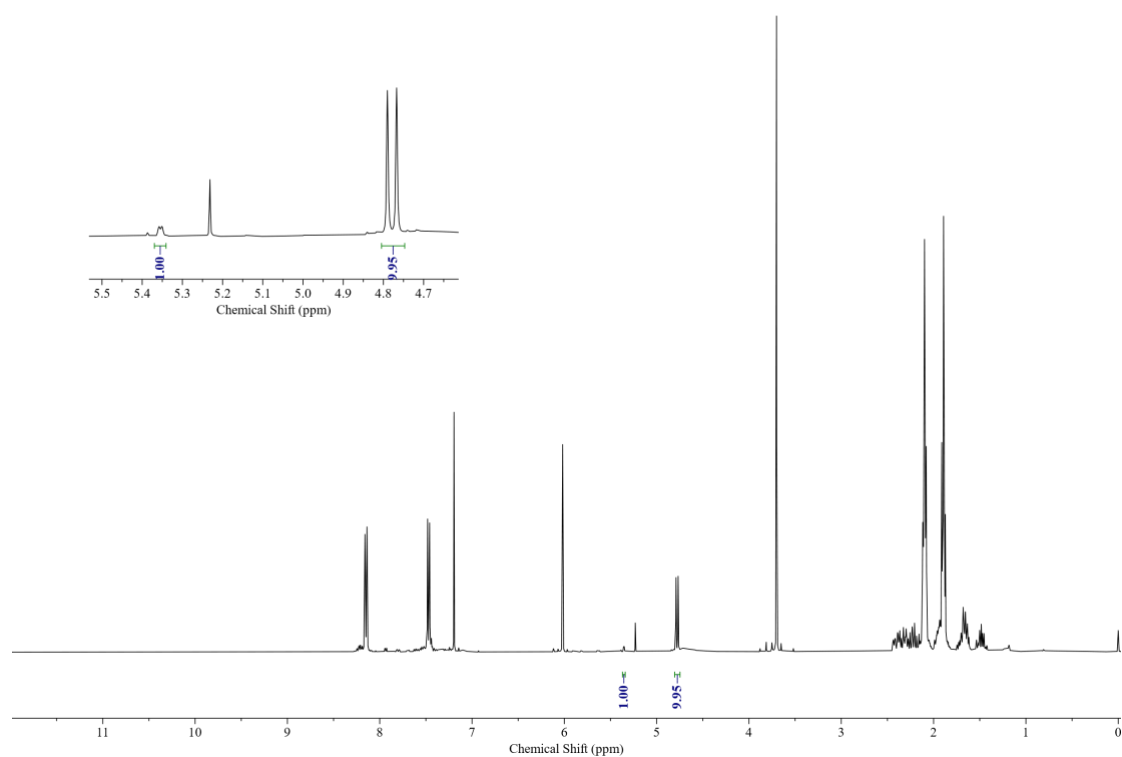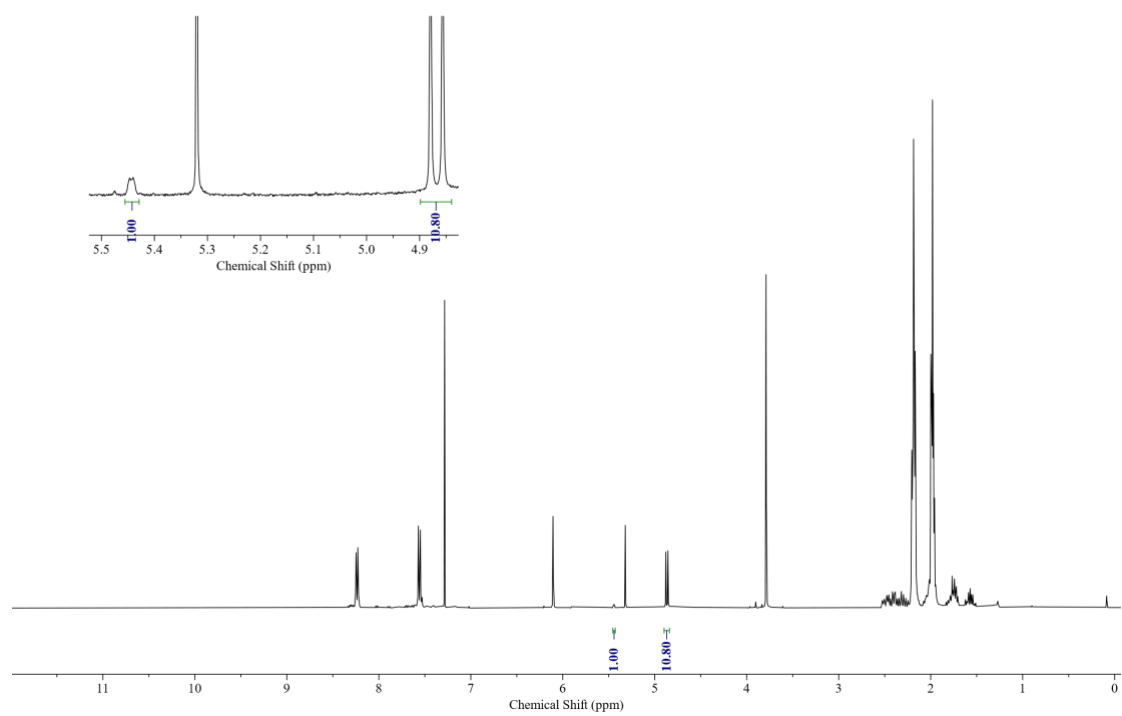

# 4-tBu phenylboronic acid

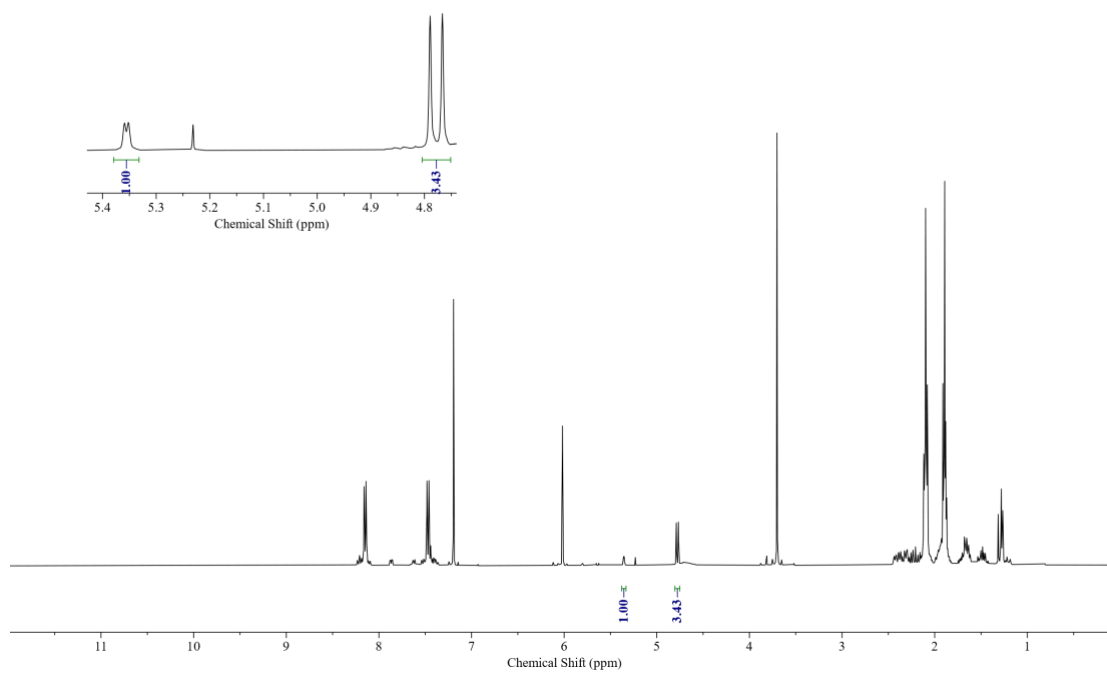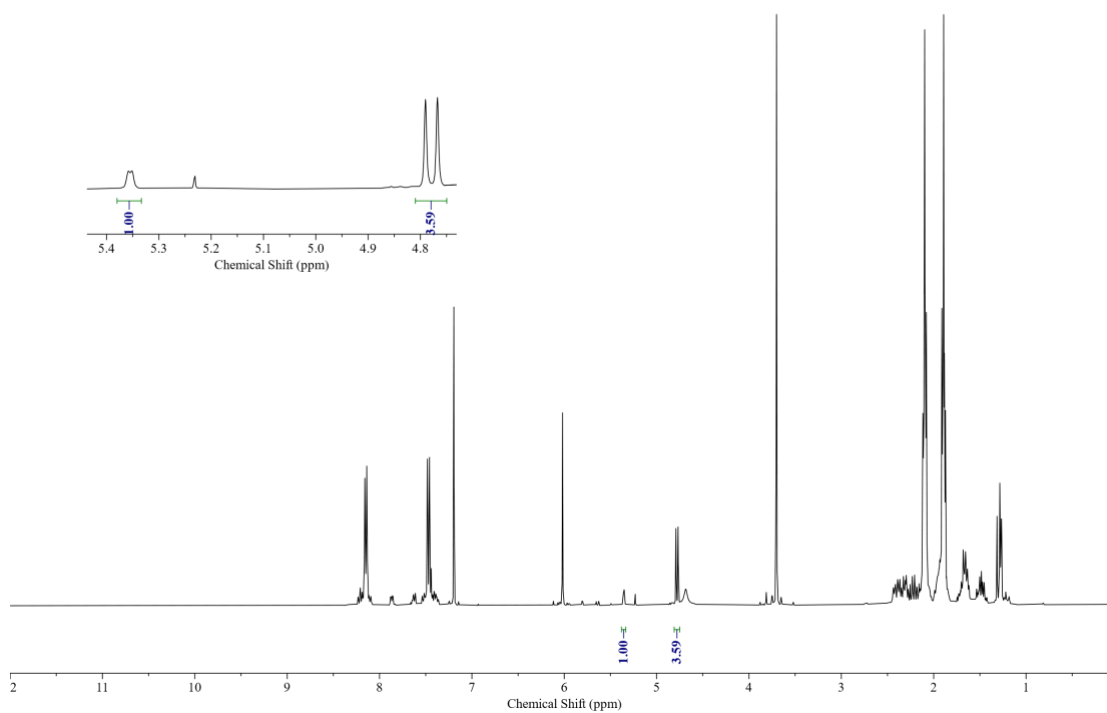

# 2,4-Me phenylboronic acid

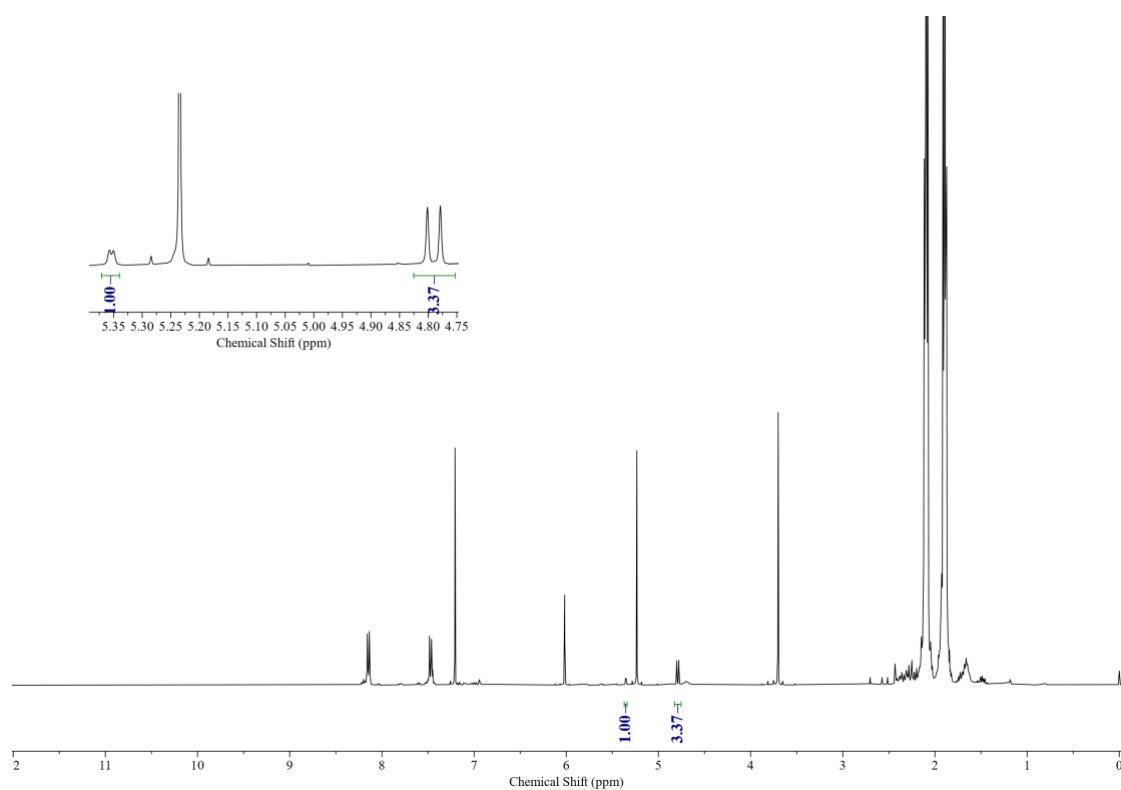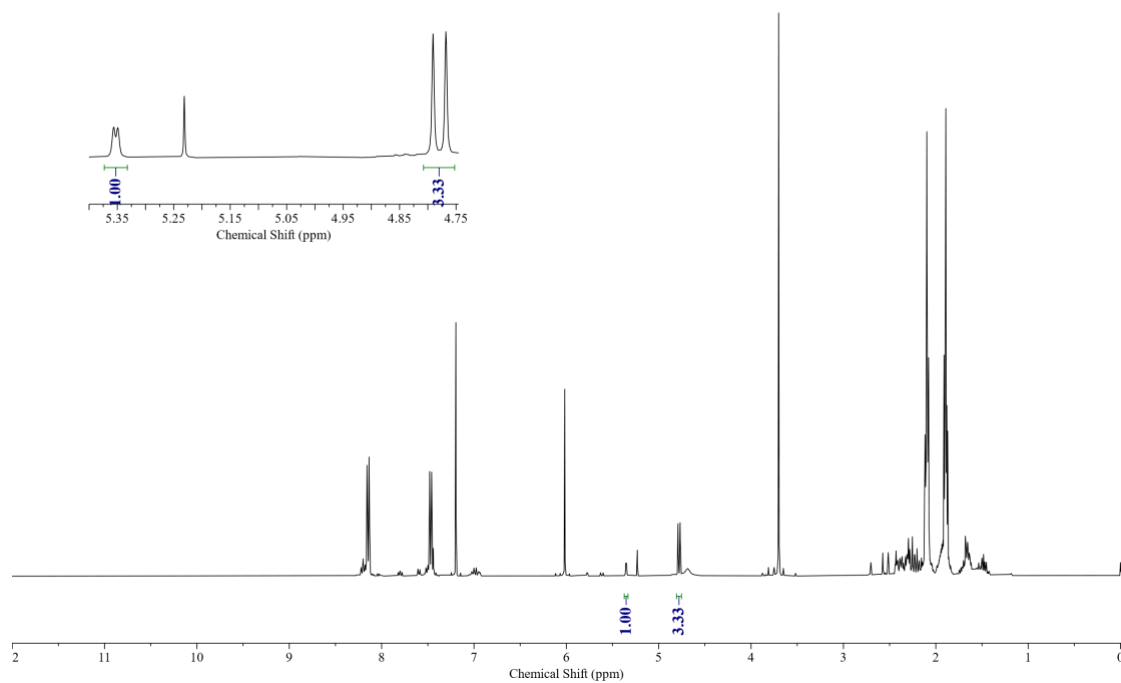

### 3,5-OMe phenylboronic acid

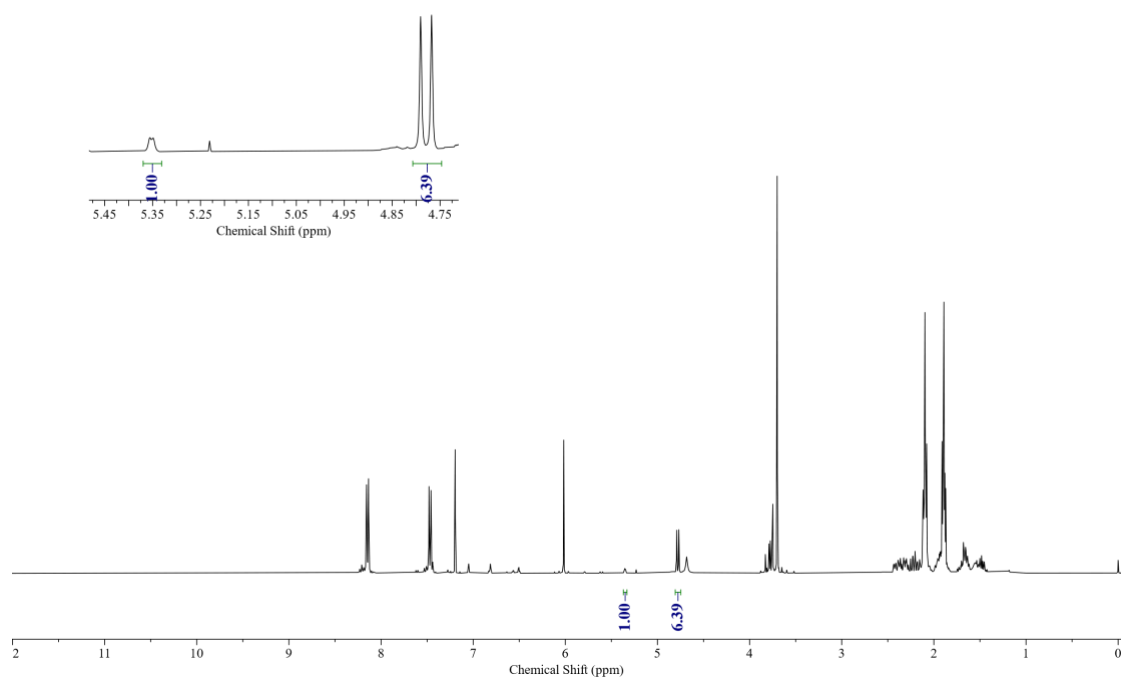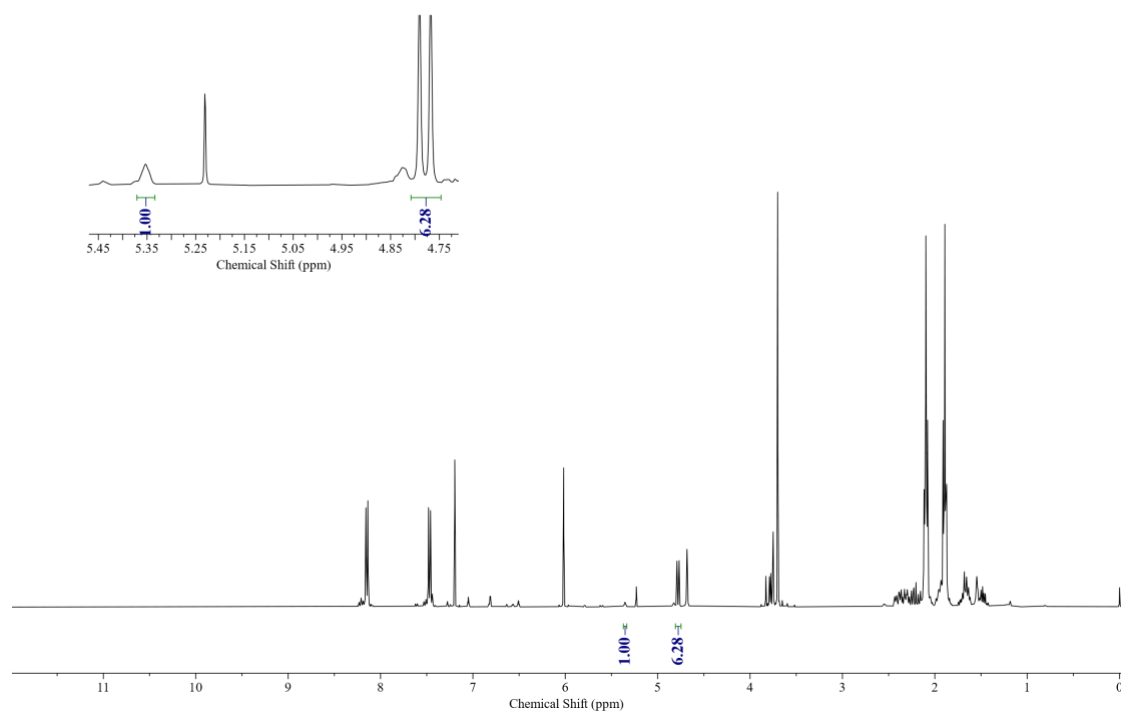

# 4-Me phenylboronic acid

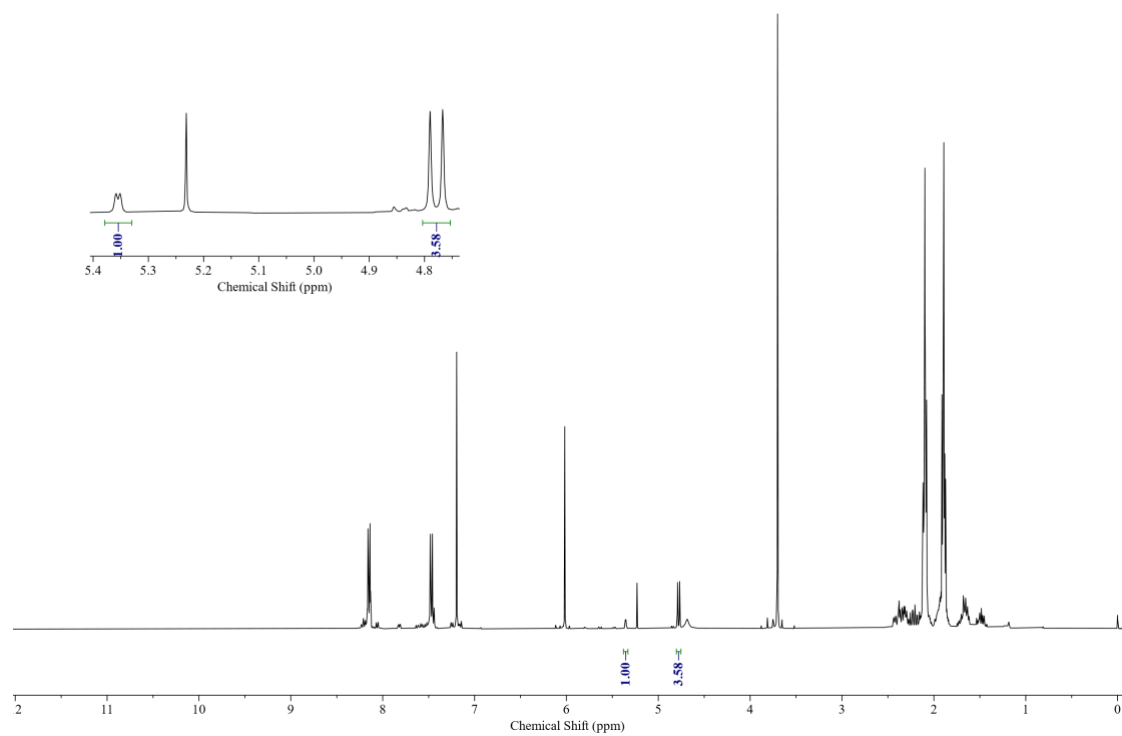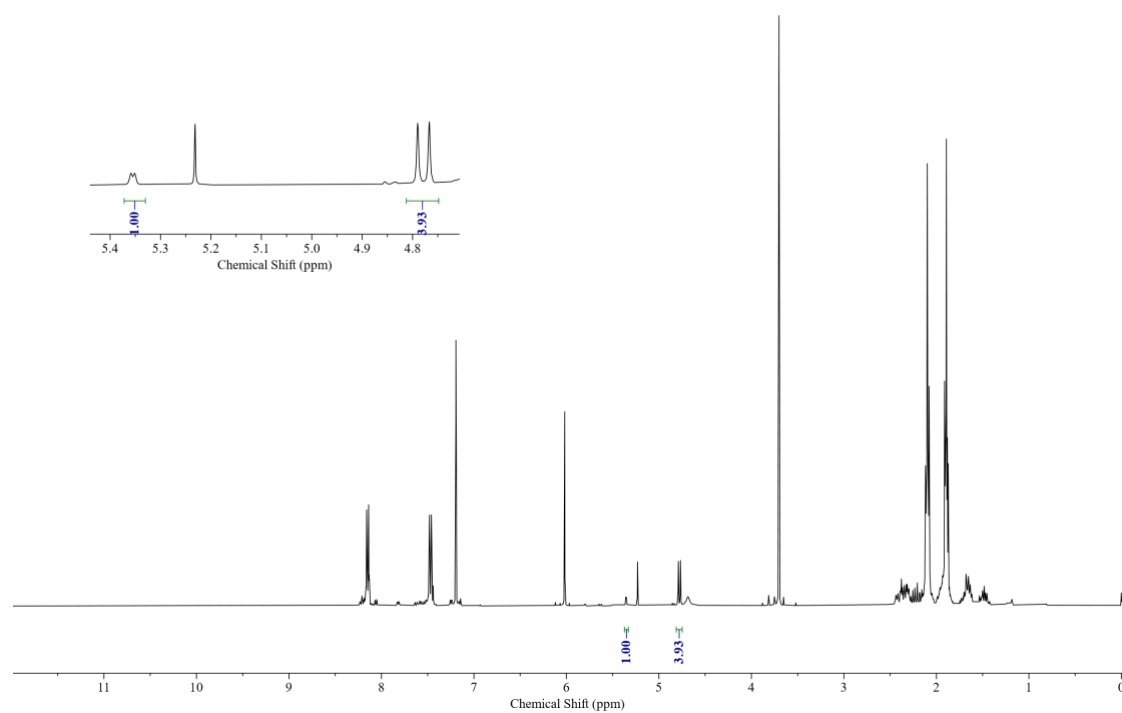

### 3-CF<sub>3</sub> phenylboronic acid

3-CF<sub>3</sub>

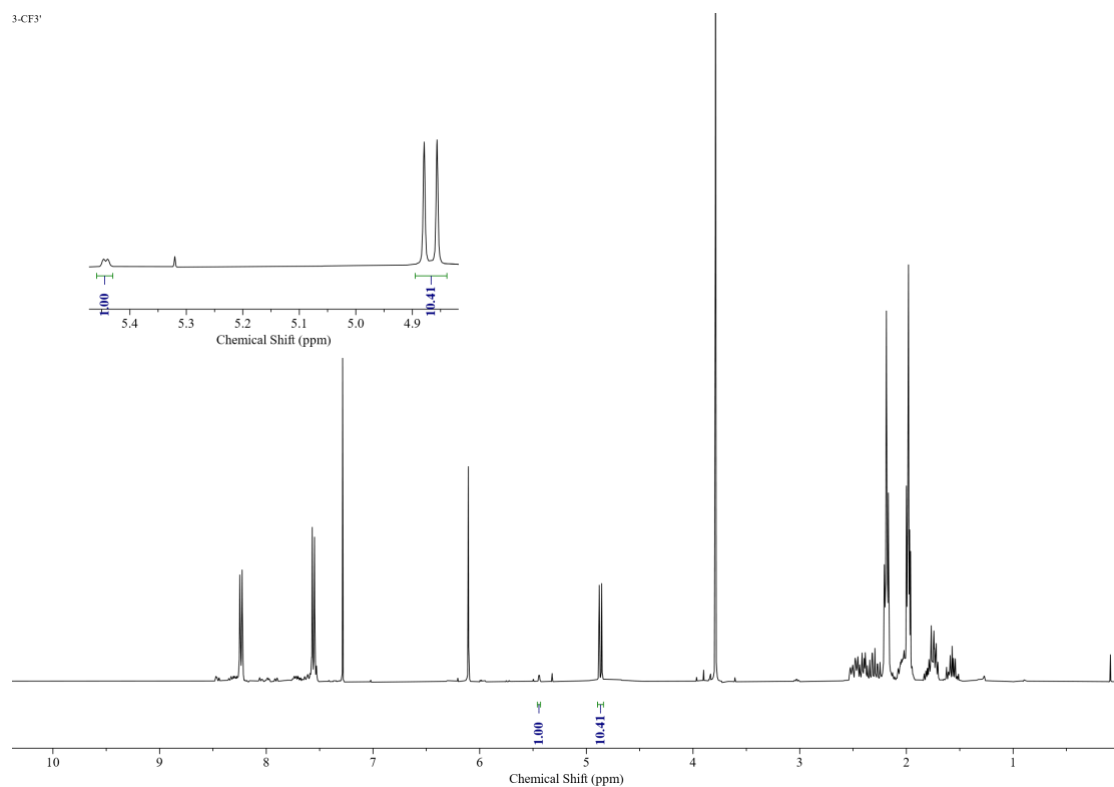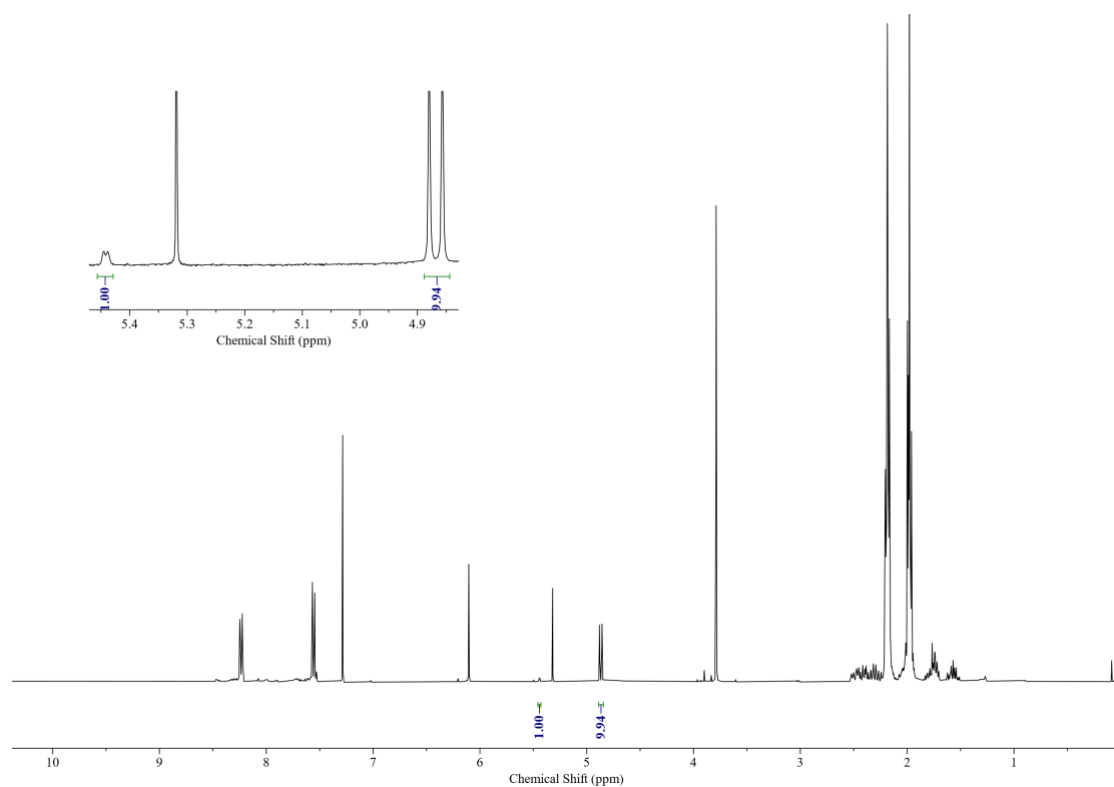

# Naphthalen boronic acid

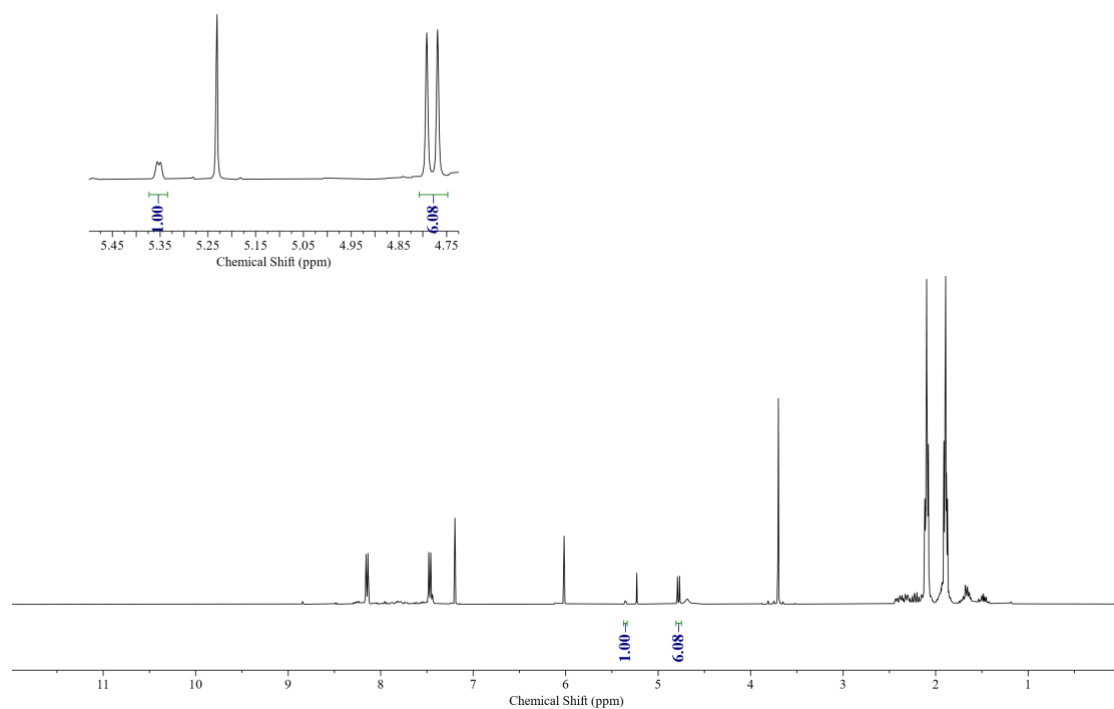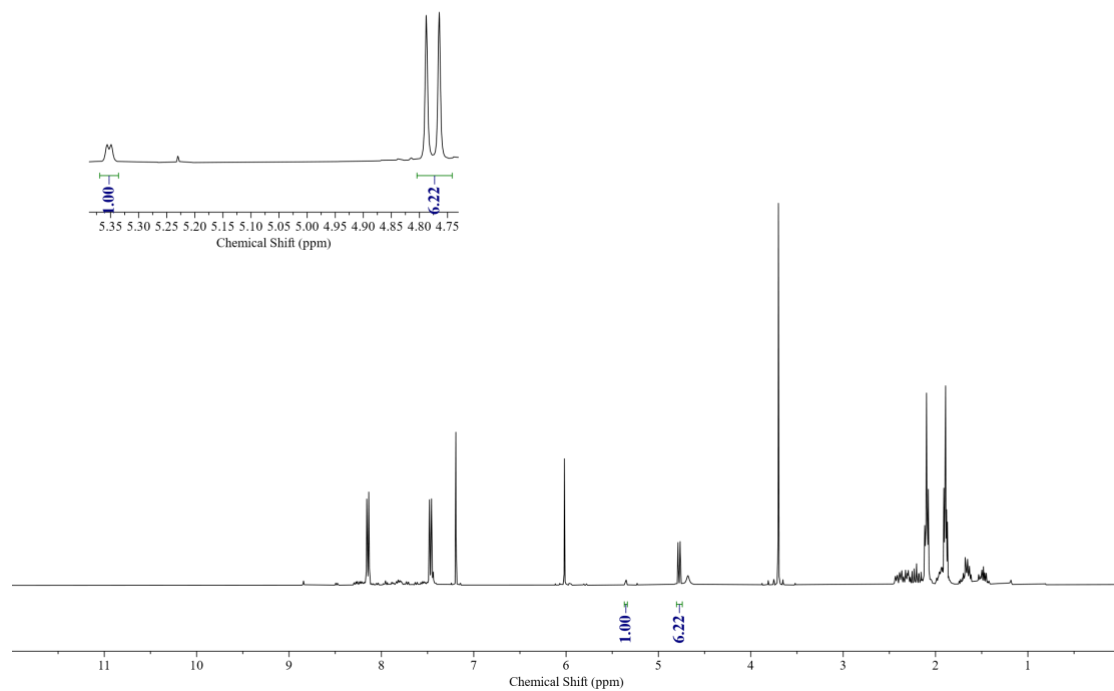

4-CF<sub>3</sub> phenylboronic acid

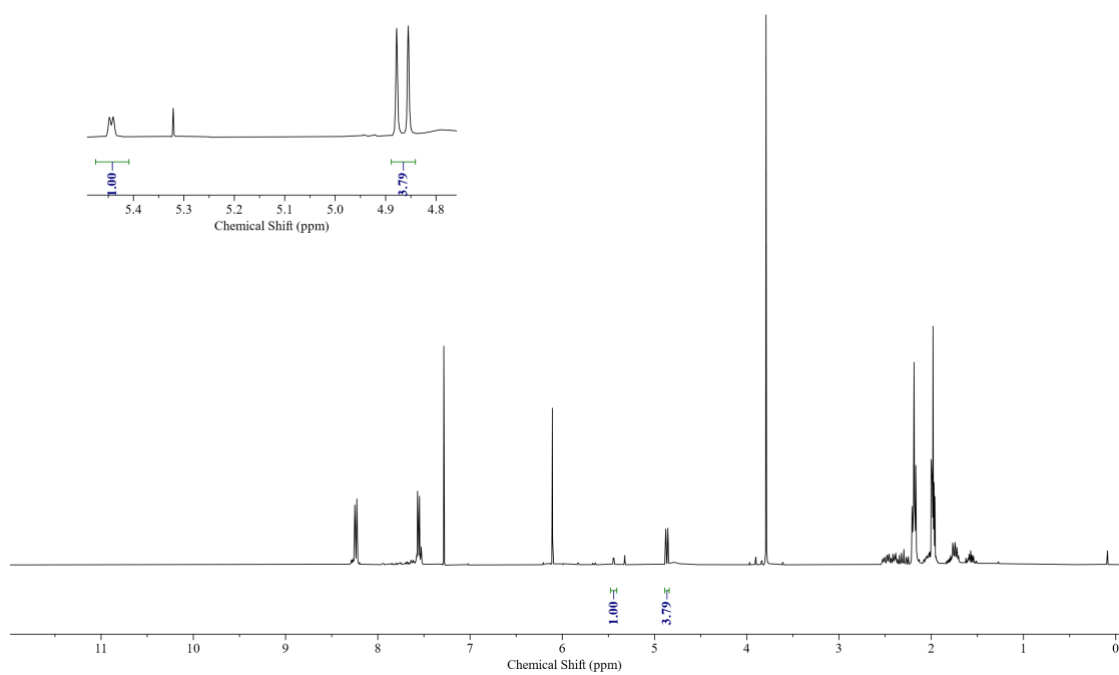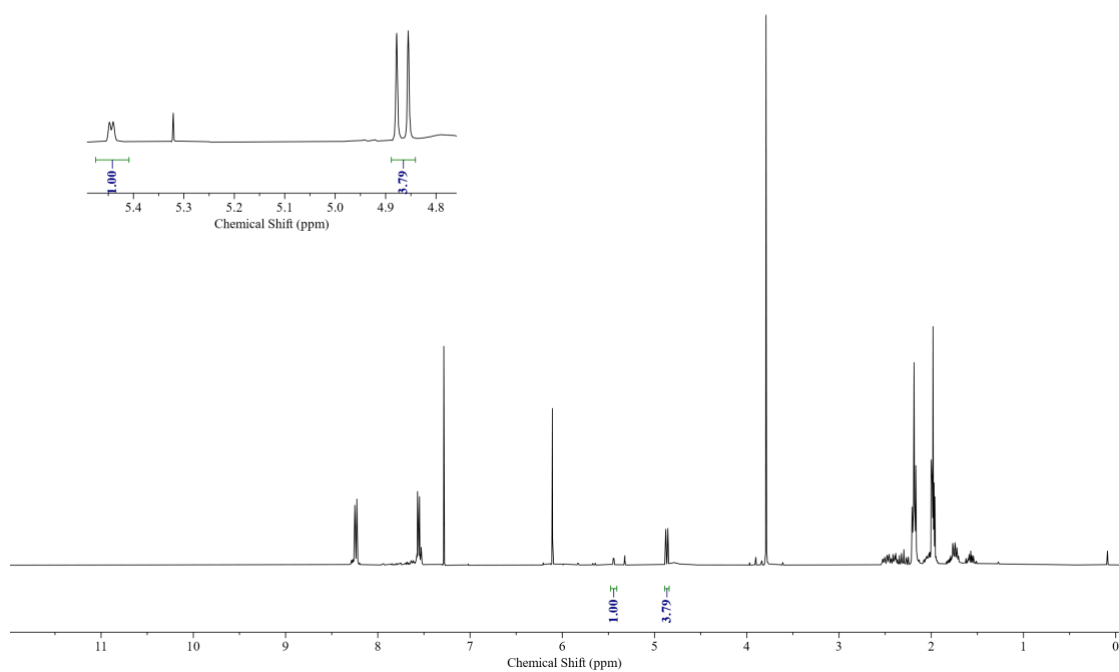



# 4-F phenylboronic acid

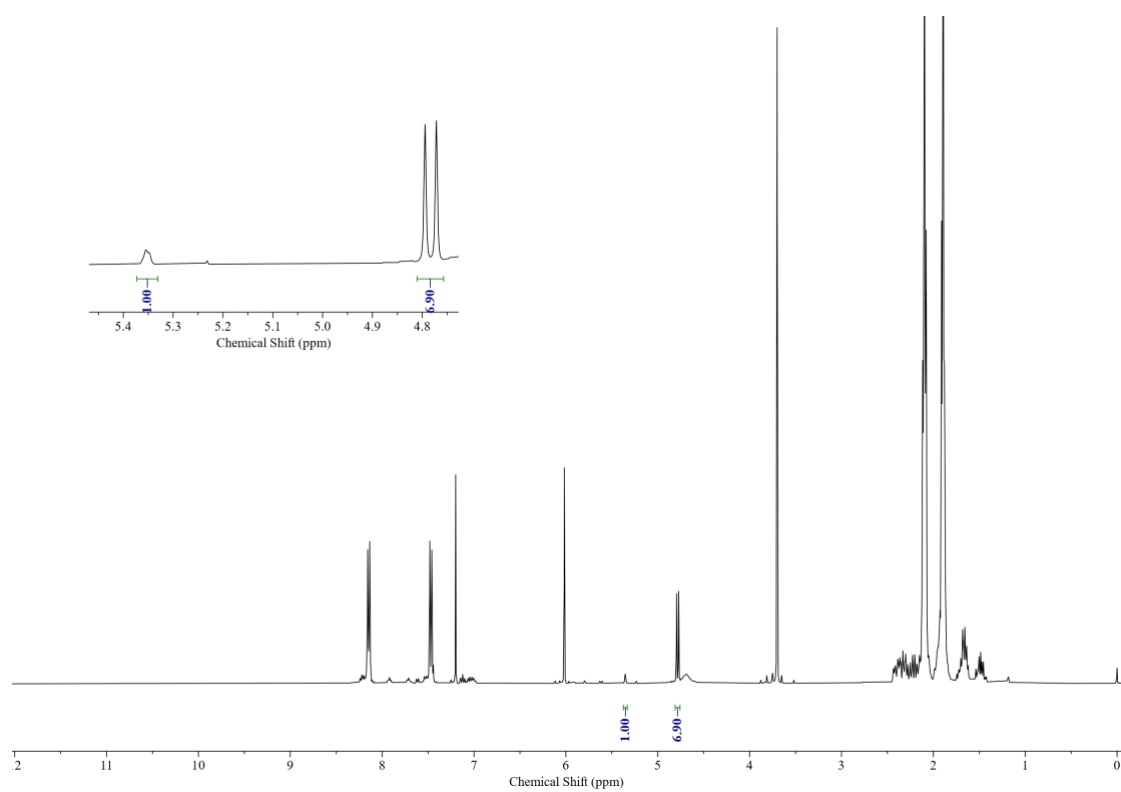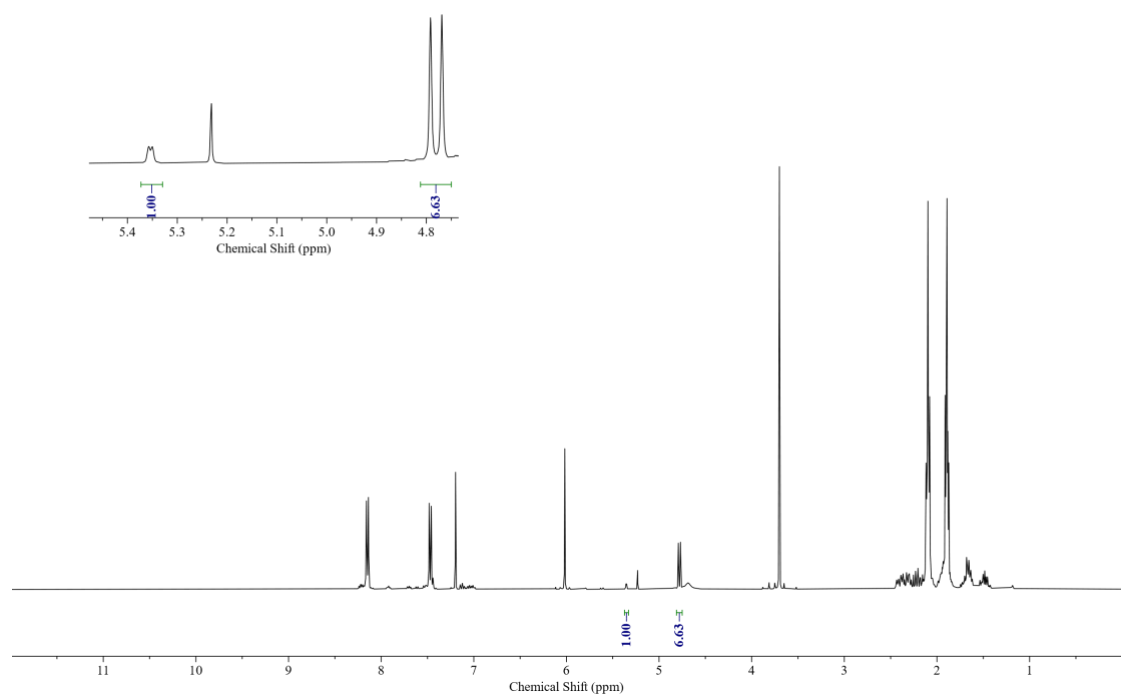

# 4-OMe phenylboronic acid

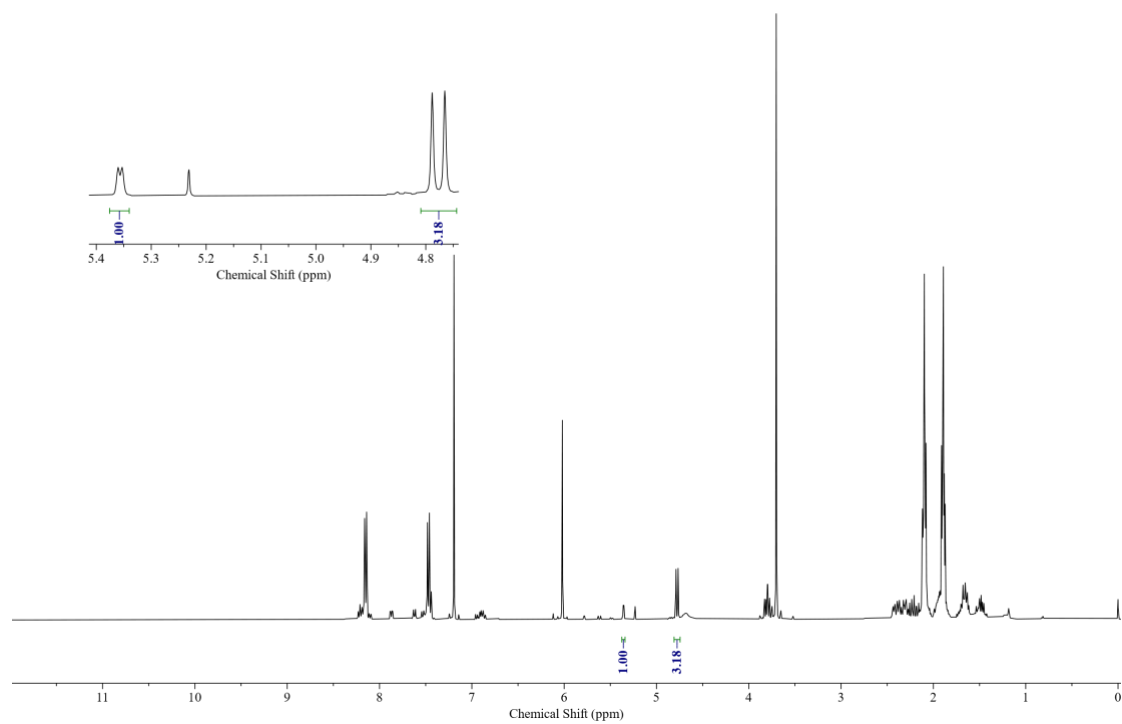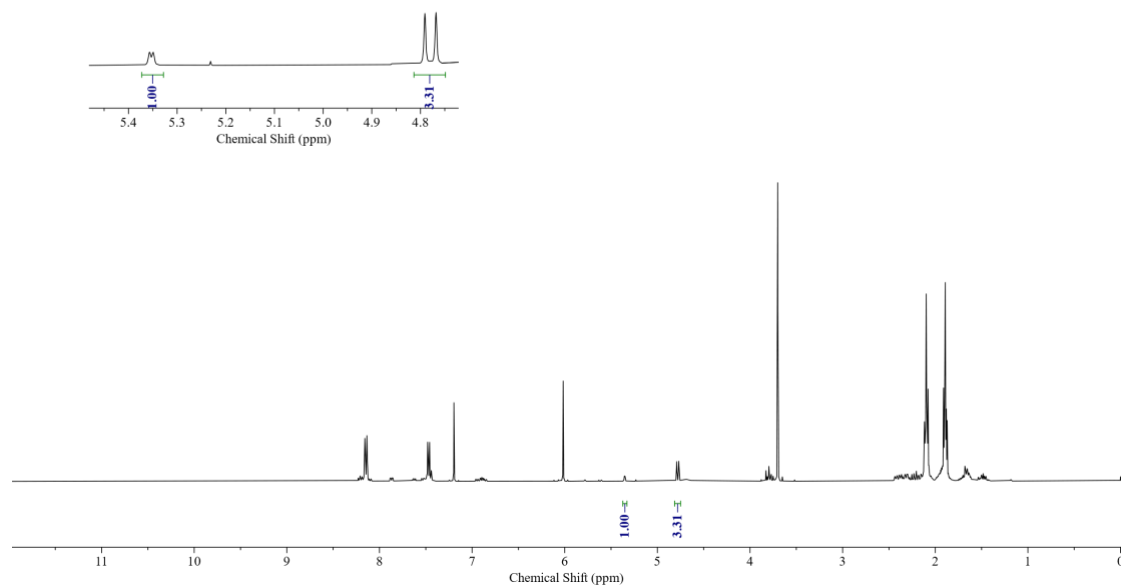

### 3-Me phenylboronic acid

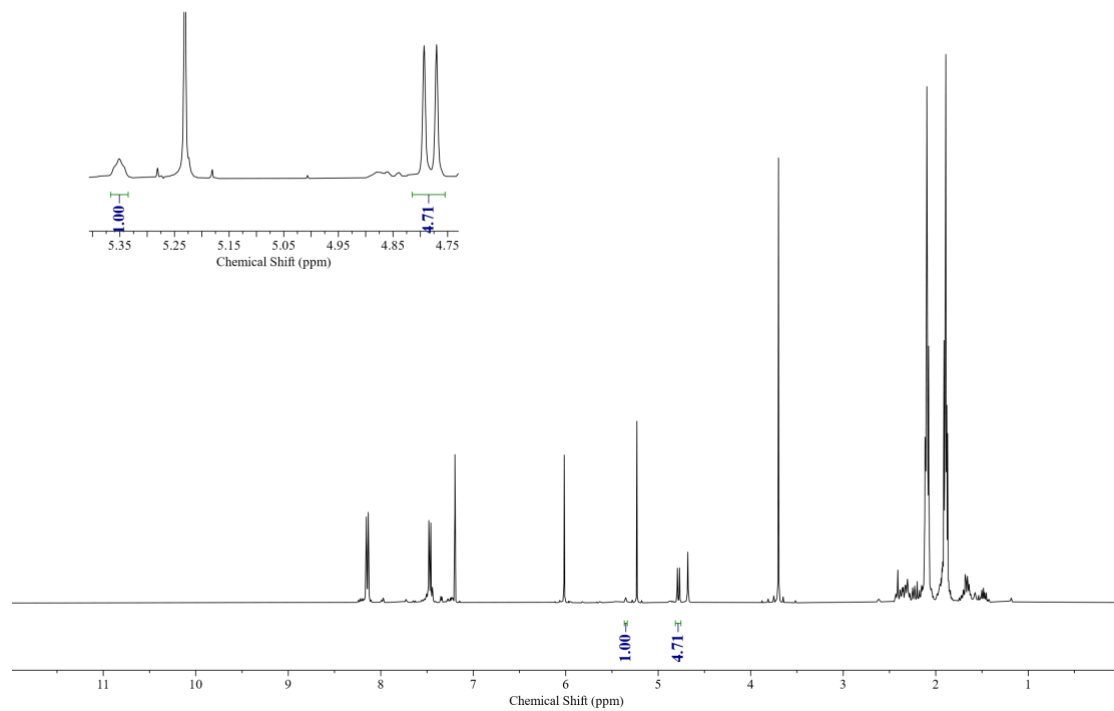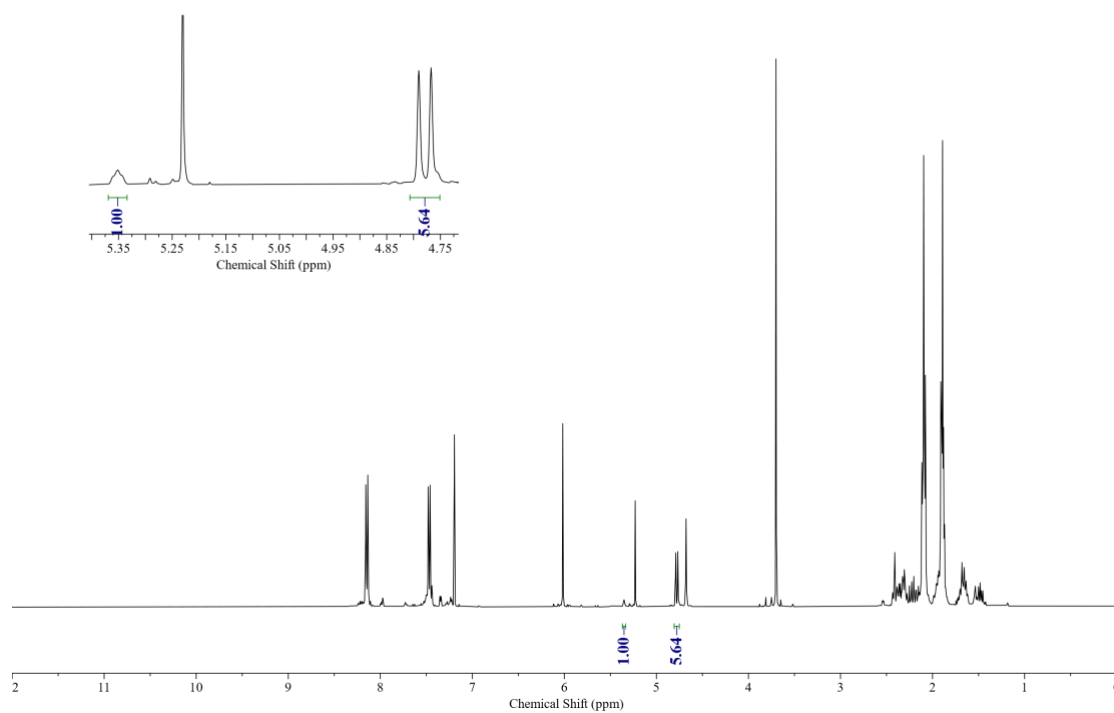

2-F phenylboronic acid

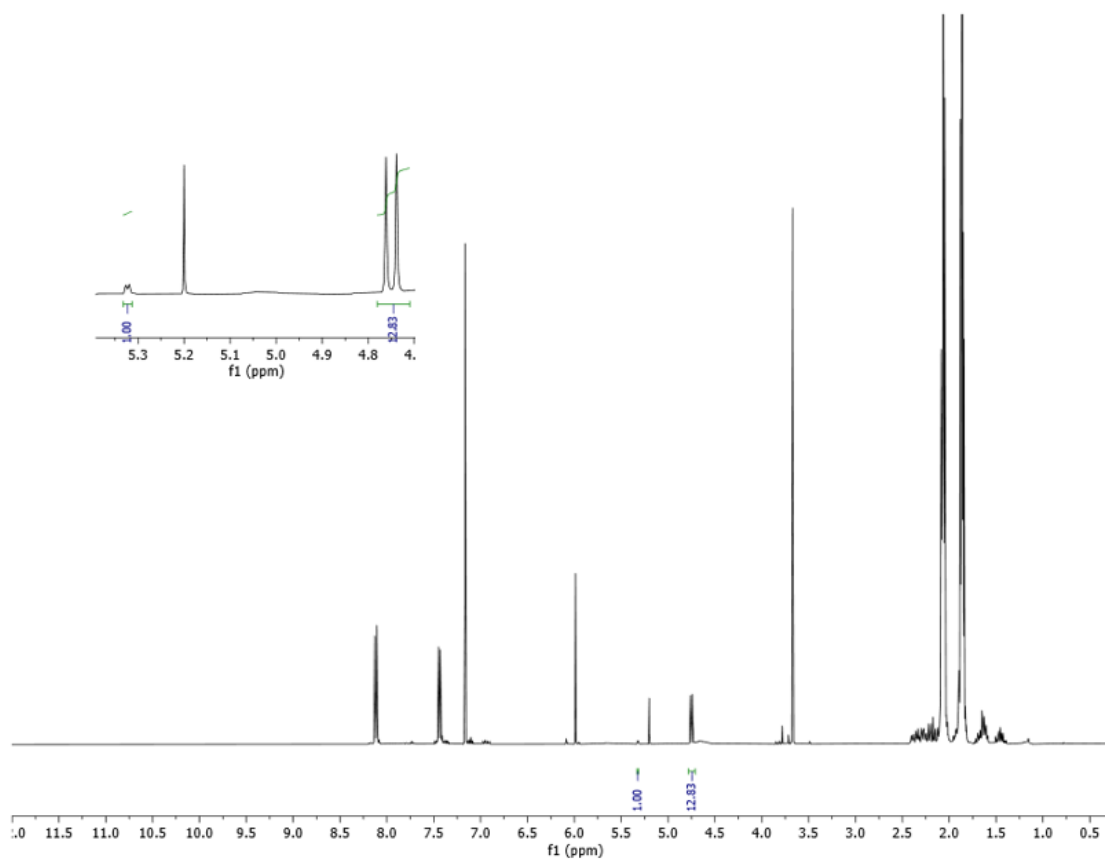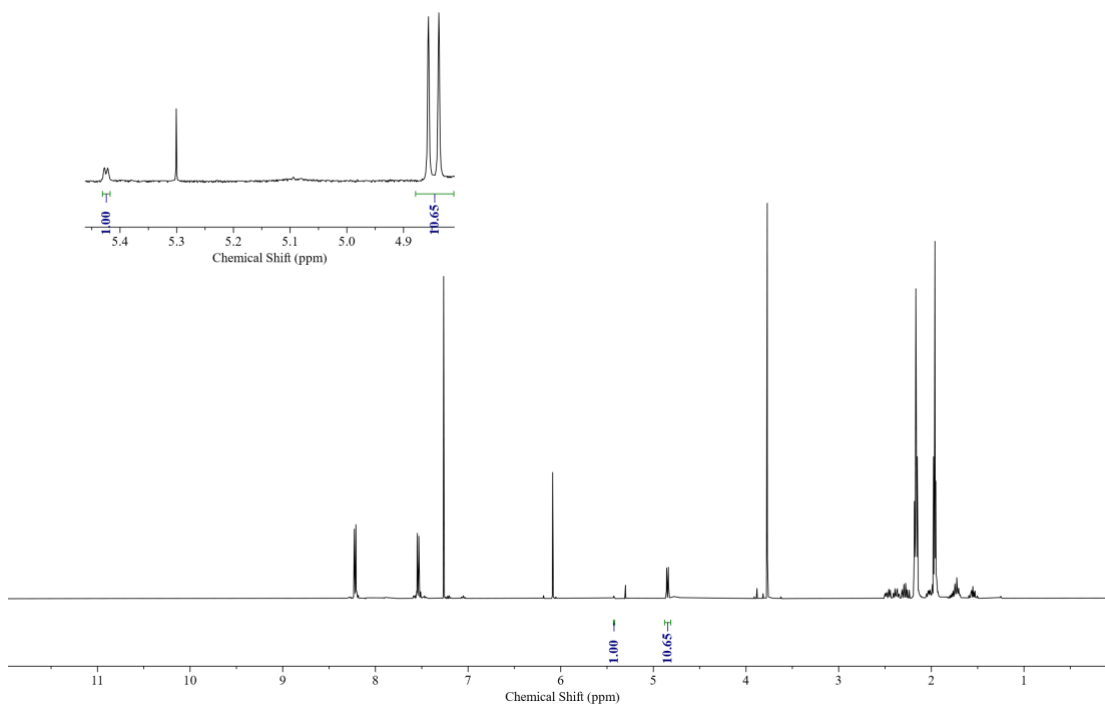

# Phenylboronic acid

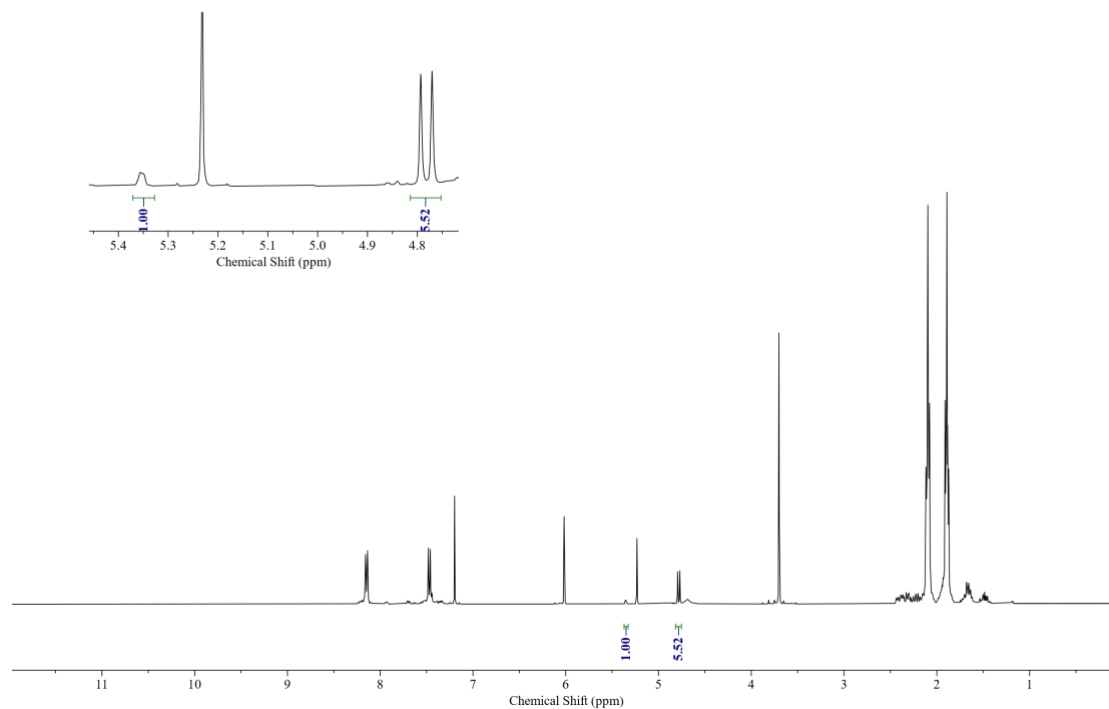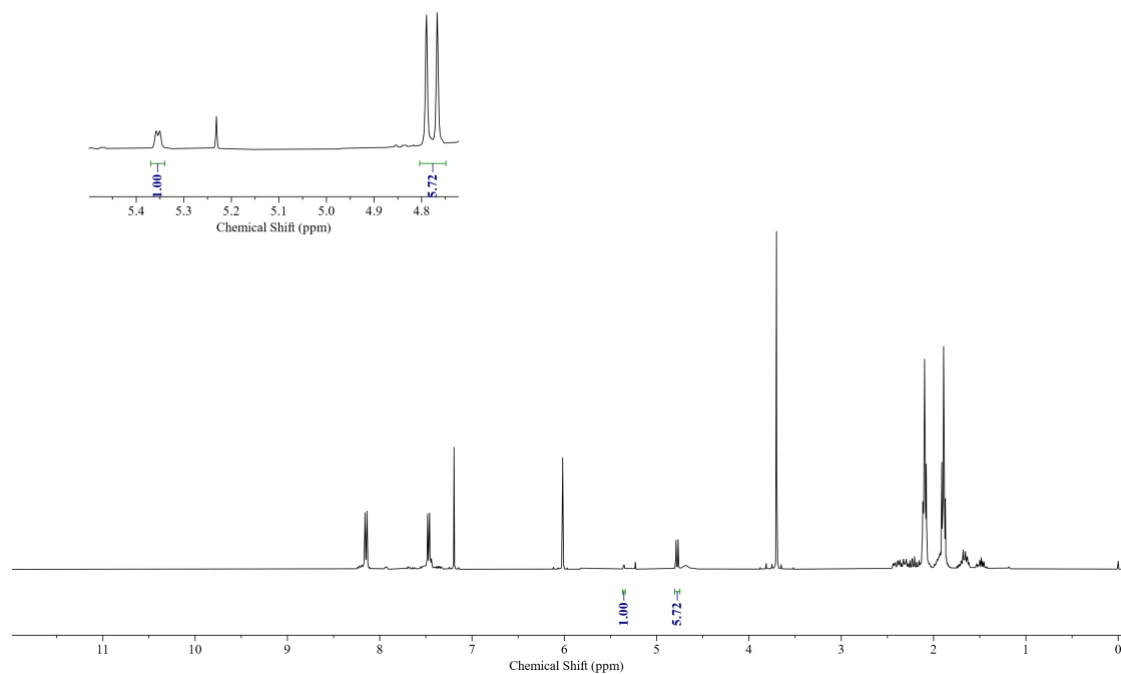

### 3,5-F phenylboronic acid

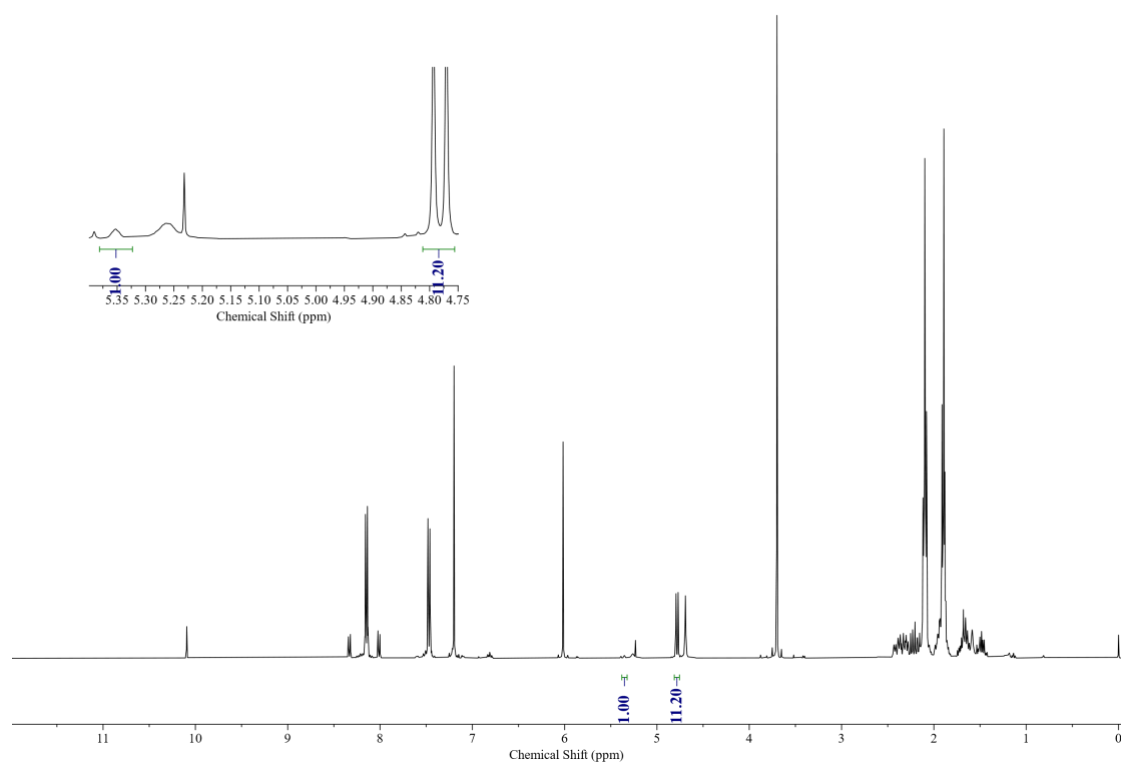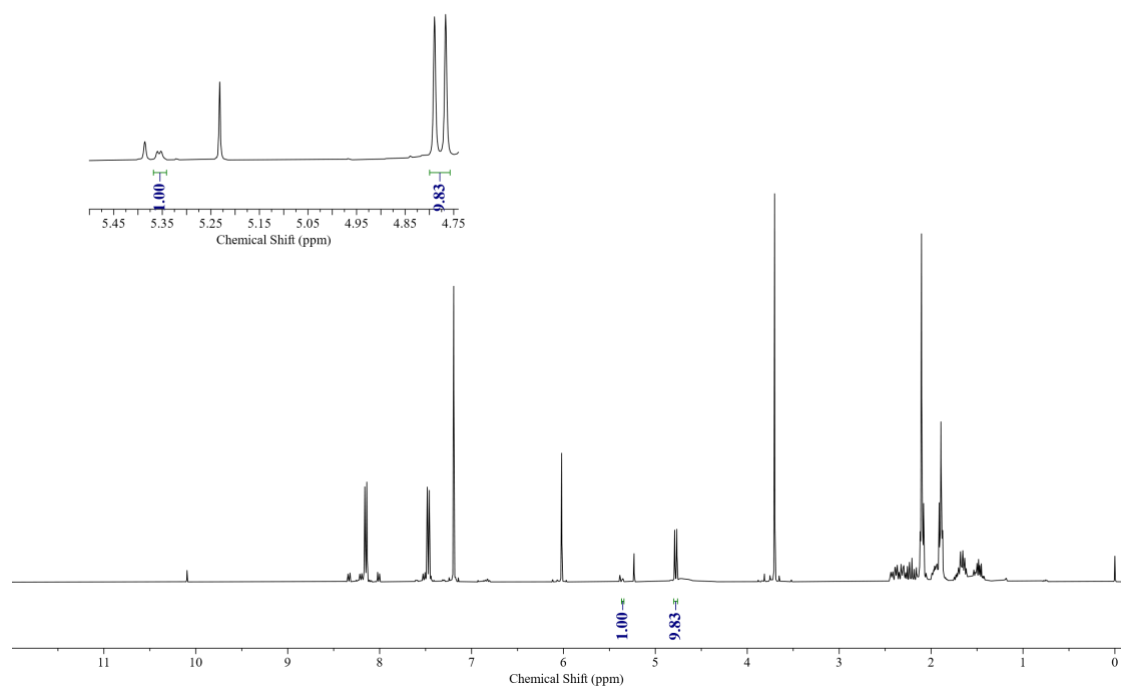

## 2-Me phenylboronic acid

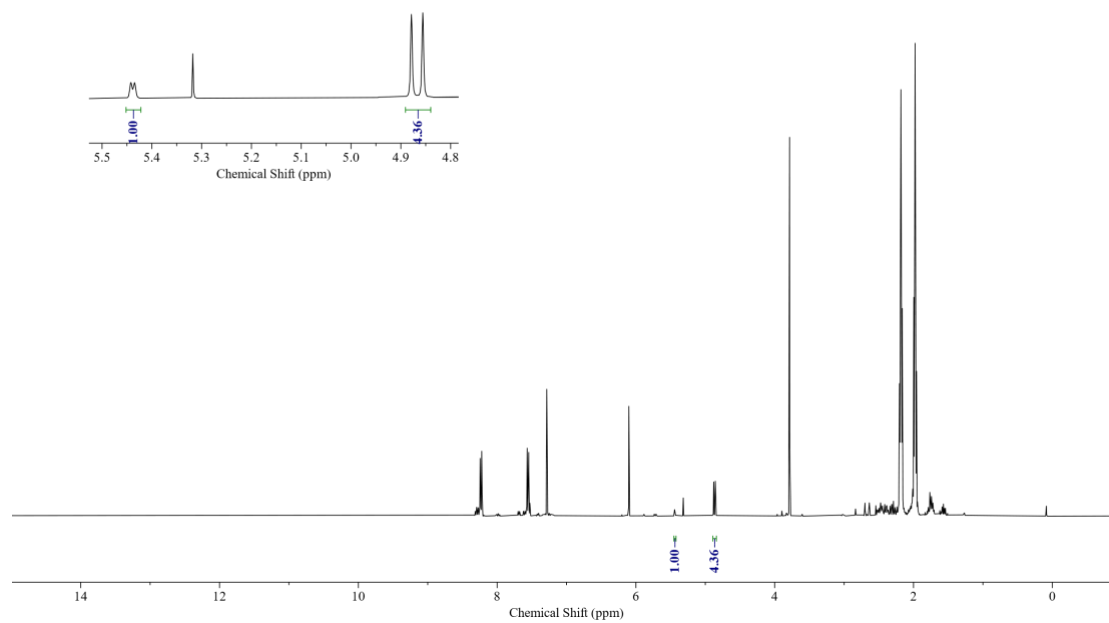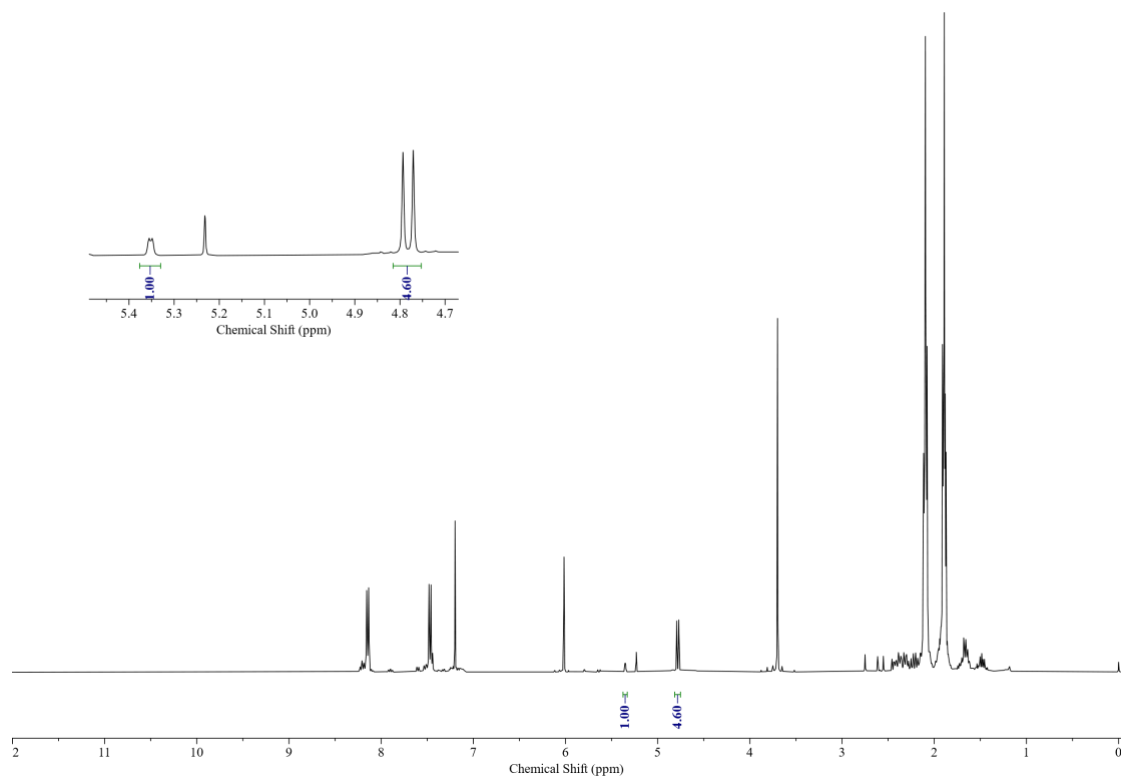

## 19. References

- (1) Gadekar, S. C.; Dhayalan, V.; Nandi, A.; Zak, I. L.; Mizrachi, M. S.; Kozuch, S.; Milo, A. Rerouting the Organocatalytic Benzoin Reaction toward Aldehyde Deuteration. *ACS Catal.* **2021**, 14561–14569. <https://doi.org/10.1021/acscatal.1c04583>.
- (2) Schmid, M. B.; Zeitler, K.; Gschwind, R. M. The Elusive Enamine Intermediate in Proline-Catalyzed Aldol Reactions: NMR Detection, Formation Pathway, and Stabilization Trends. *Angew. Chemie - Int. Ed.* **2010**, 49 (29), 4997–5003. <https://doi.org/10.1002/anie.200906629>.
- (3) Lokesh, N.; Seegerer, A.; Hioe, J.; Gschwind, R. M. Chemical Exchange Saturation Transfer in Chemical Reactions: A Mechanistic Tool for NMR Detection and Characterization of Transient Intermediates. *J. Am. Chem. Soc.* **2018**, 140 (5), 1855–1862. <https://doi.org/10.1021/jacs.7b12343>.
- (4) Zotova, N.; Franzke, A.; Armstrong, A.; Blackmond, D. G. Clarification of the Role of Water in Proline-Mediated Aldol Reactions. *J. Am. Chem. Soc.* **2007**, 129 (49), 15100–15101. <https://doi.org/10.1021/ja0738881>.
- (5) He, T.; Li, K.; Wu, M. Y.; Wu, M. B.; Wang, N.; Pu, L.; Yu, X. Q. Water Promoted Enantioselective Aldol Reaction by Proline-Cholesterol and -Diosgenin Based Amphiphilic Organocatalysts. *Tetrahedron* **2013**, 69 (25), 5136–5143. <https://doi.org/10.1016/j.tet.2013.04.078>.
- (6) Yadav, G. D.; Singh, S. Direct Asymmetric Aldol Reactions Catalysed by Trans-4-Hydroxy-(S)-Prolinamide in Solvent-Free Conditions. *Tetrahedron Asymmetry* **2015**, 26 (20), 1156–1166. <https://doi.org/10.1016/j.tetasy.2015.09.003>.
- (7) Sai, M.; Yamamoto, H. Chiral Brønsted Acid as a True Catalyst: Asymmetric Mukaiyama Aldol and Hosomi-Sakurai Allylation Reactions. *J. Am. Chem. Soc.* **2015**, 137 (22), 7091–7094. <https://doi.org/10.1021/jacs.5b04168>.
- (8) Wu, C.; Fu, X.; Li, S. New Simple and Recyclable O-Acylation Serine Derivatives as Highly Enantioselective Catalysts for the Large-Scale Asymmetric Direct Aldol Reactions in the Presence of Water. *Tetrahedron* **2011**, 67 (23), 4283–4290. <https://doi.org/10.1016/j.tet.2011.03.083>.
- (9) Firouzabadi, H.; Iranpoor, N.; Ghaderi, A.; Ghavami, M. Cerium(IV) Oxide as a Neutral Catalyst for Aldehyde-Induced Decarboxylative Coupling of L-Proline with Triethyl Phosphite and Nitromethane. *Tetrahedron Lett.* **2012**, 53 (41), 5515–5518. <https://doi.org/10.1016/j.tetlet.2012.08.012>.
